# Supplementary material for: Understanding the Heat Shock Response in the Sea Cucumber Apostichopus japonicus, Using iTRAQ-Based Proteomics
Source: MDPI journal article supplement (doi:10.3390/ijms17020150), 2016-02-04
Supplement: s1 [file s1]

# Supplementary Materials: Understanding the Heat Shock Response in the Sea Cucumber *Apostichopus Japonicus*, Using iTRAQ-Based Proteomics

Dongxue Xu, Lina Sun, Shilin Liu, Libin Zhang and Hongsheng Yang

Table S2. Go enriched analysis of different expressed proteins (HS *vs.* Control).

| Gene Ontology Terms                | Reference (N/M) | Cluster (n/m) | p-Value               | Gene Ontology Terms                                      | Reference (N/M) | Cluster (n/m) | p-Value               |
|------------------------------------|-----------------|---------------|-----------------------|----------------------------------------------------------|-----------------|---------------|-----------------------|
| Cellular Component (15 Categories) |                 |               |                       | Biology Progress (59 Categories) (Continued)             |                 |               |                       |
| Z disc                             | 12/1590, 0.8%   | 3/55, 5.5%    | $6.91 \times 10^{-3}$ | organ development                                        | 210/1793, 11.7% | 14/60, 23.3%  | $7.39 \times 10^{-3}$ |
| I band                             | 14/1590, 0.9%   | 3/55, 5.5%    | $1.09 \times 10^{-2}$ | response to estrogen stimulus                            | 14/1793, 0.8%   | 3/60, 5.0%    | $9.97 \times 10^{-3}$ |
| postsynaptic membrane              | 6/1590, 0.4%    | 2/55, 3.6%    | $1.61 \times 10^{-2}$ | reproductive structure development                       | 14/1793, 0.8%   | 3/60, 5.0%    | $9.97 \times 10^{-3}$ |
| extracellular region               | 46/1590, 2.9%   | 5/55, 9.1%    | $1.91 \times 10^{-2}$ | reproductive system development                          | 14/1793, 0.8%   | 3/60, 5.0%    | $9.97 \times 10^{-3}$ |
| brush border                       | 7/1590, 0.4%    | 2/55, 3.6%    | $2.21 \times 10^{-2}$ | L-phenylalanine metabolic process                        | 5/1793, 0.3%    | 2/60, 3.3%    | $1.03 \times 10^{-2}$ |
| extracellular matrix               | 18/1590, 1.1%   | 3/55, 5.5%    | $2.21 \times 10^{-2}$ | L-phenylalanine catabolic process                        | 5/1793, 0.3%    | 2/60, 3.3%    | $1.03 \times 10^{-2}$ |
| sarcomere                          | 21/1590, 1.3%   | 3/55, 5.5%    | $3.35 \times 10^{-2}$ | regulation of striated muscle contraction                | 5/1793, 0.3%    | 2/60, 3.3%    | $1.03 \times 10^{-2}$ |
| extracellular matrix part          | 9/1590, 0.6%    | 2/55, 3.6%    | $3.62 \times 10^{-2}$ | intracellular steroid hormone receptor signaling pathway | 5/1793, 0.3%    | 2/60, 3.3%    | $1.03 \times 10^{-2}$ |
| synaptic membrane                  | 9/1590, 0.6%    | 2/55, 3.6%    | $3.62 \times 10^{-2}$ | peptide catabolic process                                | 5/1793, 0.3%    | 2/60, 3.3%    | $1.03 \times 10^{-2}$ |
| myofibril                          | 22/1590, 1.4%   | 3/55, 5.5%    | $3.79 \times 10^{-2}$ | female sex differentiation                               | 5/1793, 0.3%    | 2/60, 3.3%    | $1.03 \times 10^{-2}$ |
| contractile fiber part             | 22/1590, 1.4%   | 3/55, 5.5%    | $3.79 \times 10^{-2}$ | organic acid catabolic process                           | 75/1793, 4.2%   | 7/60, 11.7%   | $1.10 \times 10^{-2}$ |
| peroxisome                         | 39/1590, 2.5%   | 4/55, 7.3%    | $4.29 \times 10^{-2}$ | carboxylic acid catabolic process                        | 75/1793, 4.2%   | 7/60, 11.7%   | $1.10 \times 10^{-2}$ |
| microbody                          | 39/1590, 2.5%   | 4/55, 7.3%    | $4.29 \times 10^{-2}$ | sex differentiation                                      | 15/1793, 0.8%   | 3/60, 5.0%    | $1.22 \times 10^{-2}$ |
| proteinaceous extracellular matrix | 10/1590, 0.6%   | 2/55, 3.6%    | $4.43 \times 10^{-2}$ | kidney development                                       | 6/1793, 0.3%    | 2/60, 3.3%    | $1.51 \times 10^{-2}$ |
| contractile fiber                  | 24/1590, 1.5%   | 3/55, 5.5%    | $4.74 \times 10^{-2}$ | cellular iron ion homeostasis                            | 6/1793, 0.3%    | 2/60, 3.3%    | $1.51 \times 10^{-2}$ |
| Molecular Function (12 Categories) |                 |               |                       | regulation of muscle contraction                         | 6/1793, 0.3%    | 2/60, 3.3%    | $1.51 \times 10^{-2}$ |
| identical protein binding          | 92/1888, 4.9%   | 10/70, 14.3%  | $1.62 \times 10^{-3}$ | response to organic cyclic compound                      | 48/1793, 2.7%   | 5/60, 8.3%    | $2.01 \times 10^{-2}$ |
| protein dimerization activity      | 90/1888, 4.8%   | 9/70, 12.9%   | $4.99 \times 10^{-3}$ | regulation of system process                             | 32/1793, 1.8%   | 4/60, 6.7%    | $2.02 \times 10^{-2}$ |
| protein homodimerization activity  | 62/1888, 3.3%   | 7/70, 10.0%   | $6.87 \times 10^{-3}$ | regulation of receptor-mediated endocytosis              | 7/1793, 0.4%    | 2/60, 3.3%    | $2.08 \times 10^{-2}$ |

Table S2. *Cont.*

| Gene Ontology Terms                                  | Reference (N/M) | Cluster (n/m) | p-Value               | Gene Ontology Terms                   | Reference (N/M) | Cluster (n/m) | p-Value               |
|------------------------------------------------------|-----------------|---------------|-----------------------|---------------------------------------|-----------------|---------------|-----------------------|
| steroid dehydrogenase activity                       | 4/1888, 0.2%    | 2/70, 2.9%    | $7.75 \times 10^{-3}$ | small molecule catabolic process      | 87/1793, 4.9%   | 7/60, 11.7%   | $2.36 \times 10^{-2}$ |
| oxidoreductase activity                              | 275/1888, 14.6% | 18/70, 25.7%  | $8.87 \times 10^{-3}$ | single-organism catabolic process     | 87/1793, 4.9%   | 7/60, 11.7%   | $2.36 \times 10^{-2}$ |
| flavin adenine dinucleotide binding                  | 36/1888, 1.9%   | 5/70, 7.1%    | $9.34 \times 10^{-3}$ | cellular metal ion homeostasis        | 19/1793, 1.1%   | 3/60, 5.0%    | $2.36 \times 10^{-2}$ |
| 3-hydroxyacyl-CoA dehydrogenase activity             | 6/1888, 0.3%    | 2/70, 2.9%    | $1.85 \times 10^{-2}$ | metal ion homeostasis                 | 19/1793, 1.1%   | 3/60, 5.0%    | $2.36 \times 10^{-2}$ |
| peroxiredoxin activity                               | 6/1888, 0.3%    | 2/70, 2.9%    | $1.85 \times 10^{-2}$ | regulation of biological quality      | 220/1793, 12.3% | 13/60, 21.7%  | $2.60 \times 10^{-2}$ |
| receptor binding                                     | 76/1888, 4.0%   | 7/70, 10.0%   | $2.02 \times 10^{-2}$ | hormone metabolic process             | 20/1793, 1.1%   | 3/60, 5.0%    | $2.71 \times 10^{-2}$ |
| hydrolase activity, acting on glycosyl bonds         | 33/1888, 1.7%   | 4/70, 5.7%    | $3.15 \times 10^{-2}$ | sarcomere organization                | 8/1793, 0.4%    | 2/60, 3.3%    | $2.71 \times 10^{-2}$ |
| coenzyme binding                                     | 86/1888, 4.6%   | 7/70, 10.0%   | $3.70 \times 10^{-2}$ | renal system development              | 8/1793, 0.4%    | 2/60, 3.3%    | $2.71 \times 10^{-2}$ |
| actin binding                                        | 36/1888, 1.9%   | 4/70, 5.7%    | $4.17 \times 10^{-2}$ | single-organism developmental process | 319/1793, 17.8% | 17/60, 28.3%  | $2.74 \times 10^{-2}$ |
| <b>Biology Progress (59 Categories)</b>              |                 |               |                       | response to organic substance         | 158/1793, 8.8%  | 10/60, 16.7%  | $3.34 \times 10^{-2}$ |
| response to hormone stimulus                         | 64/1793, 3.6%   | 9/60, 15.0%   | $1.86 \times 10^{-4}$ | regulation of muscle system process   | 9/1793, 0.5%    | 2/60, 3.3%    | $3.41 \times 10^{-2}$ |
| response to metal ion                                | 34/1793, 1.9%   | 6/60, 10.0%   | $7.06 \times 10^{-4}$ | peptide metabolic process             | 22/1793, 1.2%   | 3/60, 5.0%    | $3.49 \times 10^{-2}$ |
| response to lipid                                    | 48/1793, 2.7%   | 7/60, 11.7%   | $8.27 \times 10^{-4}$ | cellular amino acid catabolic process | 38/1793, 2.1%   | 4/60, 6.7%    | $3.58 \times 10^{-2}$ |
| aromatic amino acid family catabolic process         | 8/1793, 0.4%    | 3/60, 5.0%    | $1.77 \times 10^{-3}$ | regulation of growth                  | 38/1793, 2.1%   | 4/60, 6.7%    | $3.58 \times 10^{-2}$ |
| gonad development                                    | 9/1793, 0.5%    | 3/60, 5.0%    | $2.59 \times 10^{-3}$ | muscle structure development          | 39/1793, 2.2%   | 4/60, 6.7%    | $3.89 \times 10^{-2}$ |
| response to lead ion                                 | 3/1793, 0.2%    | 2/60, 3.3%    | $3.23 \times 10^{-3}$ | 2-oxoglutarate metabolic process      | 10/1793, 0.6%   | 2/60, 3.3%    | $4.17 \times 10^{-2}$ |
| response to endogenous stimulus                      | 95/1793, 5.3%   | 9/60, 15.0%   | $3.50 \times 10^{-3}$ | regulation of heart contraction       | 10/1793, 0.6%   | 2/60, 3.3%    | $4.17 \times 10^{-2}$ |
| response to steroid hormone stimulus                 | 32/1793, 1.8%   | 5/60, 8.3%    | $3.56 \times 10^{-3}$ | response to temperature stimulus      | 10/1793, 0.6%   | 2/60, 3.3%    | $4.17 \times 10^{-2}$ |
| aromatic amino acid family metabolic process         | 10/1793, 0.6%   | 3/60, 5.0%    | $3.62 \times 10^{-3}$ | regulation of hormone levels          | 24/1793, 1.3%   | 3/60, 5.0%    | $4.38 \times 10^{-2}$ |
| development of primary sexual characteristics        | 10/1793, 0.6%   | 3/60, 5.0%    | $3.62 \times 10^{-3}$ | cellular cation homeostasis           | 24/1793, 1.3%   | 3/60, 5.0%    | $4.38 \times 10^{-2}$ |
| tyrosine metabolic process                           | 4/1793, 0.2%    | 2/60, 3.3%    | $6.33 \times 10^{-3}$ | anatomical structure morphogenesis    | 190/1793, 10.6% | 11/60, 18.3%  | $4.60 \times 10^{-2}$ |
| female gonad development                             | 4/1793, 0.2%    | 2/60, 3.3%    | $6.33 \times 10^{-3}$ | response to abiotic stimulus          | 80/1793, 4.5%   | 6/60, 10.0%   | $4.77 \times 10^{-2}$ |
| response to aluminum ion                             | 4/1793, 0.2%    | 2/60, 3.3%    | $6.33 \times 10^{-3}$ | urogenital system development         | 11/1793, 0.6%   | 2/60, 3.3%    | $4.99 \times 10^{-2}$ |
| development of primary female sexual characteristics | 4/1793, 0.2%    | 2/60, 3.3%    | $6.33 \times 10^{-3}$ | amino-acid betaine metabolic process  | 11/1793, 0.6%   | 2/60, 3.3%    | $4.99 \times 10^{-2}$ |
| response to inorganic substance                      | 52/1793, 2.9%   | 6/60, 10.0%   | $6.68 \times 10^{-3}$ | iron ion homeostasis                  | 11/1793, 0.6%   | 2/60, 3.3%    | $4.99 \times 10^{-2}$ |

M is the number of all proteins with GO annotation; m is the number of differential expressed proteins in M; N is the number of all proteins that are annotated to the certain GO terms; n is the number of differential expressed proteins in N.
