# Supplementary material for: Understanding the Heat Shock Response in the Sea Cucumber Apostichopus japonicus, Using iTRAQ-Based Proteomics
Source: Int J Mol Sci. 2016 Feb 4;17(2):150. doi: 10.3390/ijms17020150 (PMC4783884; doi:10.3390/ijms17020150)
Supplement: Supplementary file 1 [file ijms-17-00150-s001.zip › ijms-109999-Supplementary Materials/TableS1 All proteins annotated.xlsx]

## Sheet: Sheet1
Protein ID	Accession	Desription	Mass	Seq	Score	Cov	SameSets	Spectrum	Unique Spectrum	Peptide	Unique Peptide	C-VS-HS@Ratio@set,C1_113-VS-HS1_118	C-VS-HS@Ratio@set,C2_114-VS-HS2_119	C-VS-HS@Ratio@set,C3_116-VS-HS3_121	C-VS-HS@QuantNumber@set,C1_113-VS-HS1_118	C-VS-HS@QuantNumber@set,C2_114-VS-HS2_119	C-VS-HS@QuantNumber@set,C3_116-VS-HS3_121	C-VS-HS@Sig@set,C1_113-VS-HS1_118	C-VS-HS@Sig@set,C2_114-VS-HS2_119	C-VS-HS@Sig@set,C3_116-VS-HS3_121	Accession	NCBInr Identity	NCBInr E_Value	NCBInr Accession	NCBInr Description	Uniprot_Swissprot Identity	Uniprot_Swissprot E_Value	Uniprot_Swissprot Accession	Uniprot_Swissprot Description	Uniprot_Tremble Identity	Uniprot_Tremble E_Value	Uniprot_Tremble Accession	Uniprot_Tremble Description	Protein_or_Domain	COG Identity	COG E-Value	COG_ID	COG Function-Description	COG Code	COG Functional-Categories	KEGG(ko_id|rank|evalue|score|identity|ko_definition)	GO Biological_Process	GO Molecular_Function	GO Cellular_Component
1	CL7206.Contig1_All	33 227 hypothetical protein SELMODRAFT_170205 [Selaginella moellendorffii] >gi|302817967|ref|XP_002990658.1| hypothetical protein SELMODRAFT_185434 [Selaginella moellendorffii] >gi|300141580|gb|EFJ08290.1| hypothetical protein SELMODRAFT_185434 [	9270	MEKPVKLAKVTKVLGRTGSQGQCTQVRVEFIDDTNRSIIRNVKGPVREGDILTLLESEREARRLR	41	18.5	1	4	4	1	1	0.768	1.543	0.687	3	3	3	-	-	-	CL7206.Contig1_All	96.08	3e-19	gi|157690778|tpe|CAL69116.1|	TPA: putative 40S ribosomal protein S28 isoform 1 [Spadella cephaloptera]	87.76	2e-19	sp|Q56JX6|RS28_BOVIN	40S ribosomal protein S28 OS=Bos taurus GN=RPS28 PE=3 SV=1	96.08	1e-18	A8E6C9	A8E6C9_9BILA Putative 40S ribosomal protein S28 isoform 1 OS=Spadella cephaloptera GN=rps28.1 PE=4 SV=1	SPCC285.15c	106	1e-23	COG2053	Ribosomal protein S28E/S33	J	Translation, ribosomal structure and biogenesis ;	K02979|1|1e-21|101|spu:760937|small subunit ribosomal protein S28e	GO:0006413//translational initiation;GO:0019083//viral transcription;GO:0006407//rRNA export from nucleus;GO:0006364//rRNA processing;GO:0006414//translational elongation;GO:0042274//ribosomal small subunit biogenesis;GO:0006415//translational termination;GO:0006614//SRP-dependent cotranslational protein targeting to membrane;GO:0000184//nuclear-transcribed mRNA catabolic process, nonsense-mediat…	GO:0003723//RNA binding;GO:0003735//structural constituent of ribosome;GO:0016787//hydrolase activity	GO:0022627//cytosolic small ribosomal subunit
2	CL2629.Contig3_All	852 1796 minus strand hypothetical protein CHLNCDRAFT_56437 [Chlorella variabilis]	39709	ILKDVATVAFCDAQSTQEIHEKVLNEAVGAMLYHSITLAKEDLEKFKALRVIVRIGSGYDNVDVKAAGELGIAVCNVPGHGVEETADSTMSLILNVYRRTHWMAEMVKTGKKLVGAEQIREAGQGAMRIRGETLGIIGLGRVGTAVALRAKAFGFKIIFYDPYLSDGMEKSLGLTRVYTLQDLLFQSDCVTLHCSLNDHNHHLINEFTIKQMRQGAFLINTARGGLIDENALAQALKEGRIRAAALDVHENEPYSPSNSTLAEAPNLICTPHSAWYSDQSSSEVRESAAGEIRRAITGRIPQILRNCVNKEYLAP	193	10.2	-	4	4	2	2	0.754	0.841	1.165	4	3	4	*	-	-	CL2629.Contig3_All	87.23	2e-16	gi|410913988|ref|XP_003970470.1|	PREDICTED: C-terminal-binding protein 2-like [Takifugu rubripes]	77.32	3e-149	sp|O46036|CTBP_DROME	C-terminal-binding protein OS=Drosophila melanogaster GN=CtBP PE=1 SV=3	83.16	2e-148	H3IWE4	H3IWE4_STRPU Uncharacterized protein OS=Strongylocentrotus purpuratus GN=SPU_018530gn PE=3 SV=1	MJ1018	190	3e-48	COG0111	Phosphoglycerate dehydrogenase and related dehydrogenases	HE	Coenzyme transport and metabolism ; Amino acid transport and metabolism ;	K04496|1|2e-161|568|spu:575207|C-terminal binding protein	GO:0022416//chaeta development;GO:0035220//wing disc development;GO:0055114//oxidation-reduction process;GO:0046427//positive regulation of JAK-STAT cascade;GO:0000122//negative regulation of transcription from RNA polymerase II promoter;GO:0001700//embryonic development via the syncytial blastoderm;GO:0030111//regulation of Wnt receptor signaling pathway	GO:0051287//NAD binding;GO:0008022//protein C-terminus binding;GO:0004617//phosphoglycerate dehydrogenase activity;GO:0003714//transcription corepressor activity;GO:0070491//repressing transcription factor binding;GO:0003713//transcription coactivator activity;GO:0042803//protein homodimerization activity	GO:0005634//nucleus
3	CL2803.Contig1_All	30 410 minus strand ---	18967	LNLEVKKFEPLDEEKFNCNDALWLMQYDKELECFRKKLFEFERHFPPSYPYSEAIENGSKYMKTRVPAWCDRIFLSLPAKTILSEDPTKVPTYDVIGEDVCMGDHKPVFLHFHLKVAPSNGQSSSNS	38	6.3	-	3	3	1	1	---	---	---	1	1	1	-	-	-	CL2803.Contig1_All	55	9e-32	gi|390349355|ref|XP_782162.2|	PREDICTED: type I inositol 1,4,5-trisphosphate 5-phosphatase-like isoform 2 [Strongylocentrotus purpuratus]	50.81	4e-29	sp|Q14642|I5P1_HUMAN	Type I inositol 1,4,5-trisphosphate 5-phosphatase OS=Homo sapiens GN=INPP5A PE=2 SV=1	58.75	6e-18	B1AP38	B1AP38_HUMAN Inositol polyphosphate-5-phosphatase, 40kDa (Fragment) OS=Homo sapiens GN=INPP5A PE=4 SV=1	SPAC9G1.10c	50.1	8e-07	COG5411	Phosphatidylinositol 5-phosphate phosphatase	T	Signal transduction mechanisms ;	K01106|1|2e-30|130|rno:365382|inositol-1,4,5-trisphosphate 5-phosphatase [EC:3.1.3.56]	GO:0006796//phosphate-containing compound metabolic process;GO:0019637//organophosphate metabolic process;GO:0044238//primary metabolic process	-	-
4	Unigene16765_All	2 427 minus strand PREDICTED: protein misato homolog 1-like [Cucumis sativus] >gi|449528485|ref|XP_004171235.1| PREDICTED: protein misato homolog 1-like [Cucumis sativus]	17757	LEDKLHFFAEECDHLQGFQVLTNFDDGFSGMSSGLVELLDDEYHGKGILTWGVIPAVPSVKSTLMDNYRVINSALAFEQLSQYSSFFVPLSLNSSLWRKQGPALTSPYLSYNPNLNYHTSAILASCIDTATLPFRLEKEALT	82	10.6	-	2	2	1	1	---	0.96	1.375	1	2	2	-	-	-	Unigene16765_All	59.65	2e-16	gi|465958634|gb|EMP28002.1|	28S ribosomal protein S29 [Chelonia mydas]	47.79	5e-34	sp|Q9BUK6|MSTO1_HUMAN	Protein misato homolog 1 OS=Homo sapiens GN=MSTO1 PE=1 SV=1	58.93	5e-15	F7IQH7	F7IQH7_CALJA Uncharacterized protein OS=Callithrix jacchus GN=MSTO1 PE=4 SV=1	-	-	-	-	-	-	-	-	GO:0007005//mitochondrion organization	-	GO:0016020//membrane;GO:0005739//mitochondrion
5	Unigene33244_All	114 719 minus strand hypothetical protein SELMODRAFT_448446 [Selaginella moellendorffii] >gi|300140720|gb|EFJ07440.1| hypothetical protein SELMODRAFT_448446 [Selaginella moellendorffii]	29365	RDTTKAEAEHIIKDEALAEEELLAELENGDIPPHIREARLDQLKQEAQQFEQRSEKGYGTYSEIEKEPEVFDITRSEEKVVIHFFHPDFRRCNIIDKHLKVLAEKLFNAKFAKMNVEKCDFLVKKLKIQVLPAILCFKEGINVDRVVGFEELGNTDNFDISVLERRLAKSGVLNLPDVRAEGKTIFGFTKTRNGSSSSSDED	61	10.9	-	2	2	2	2	1.457	0.784	0.845	2	2	2	-	*	-	Unigene33244_All	57.45	7e-51	gi|405969883|gb|EKC34828.1|	Thioredoxin domain-containing protein C2F3.12c [Crassostrea gigas]	43.37	1e-31	sp|O14096|TGTL_SCHPO	Queuine tRNA-ribosyltransferase-like protein OS=Schizosaccharomyces pombe (strain 972 / ATCC 24843) GN=SPAC2F3.13c PE=2 SV=4	51.14	3e-41	H3I925	H3I925_STRPU Uncharacterized protein OS=Strongylocentrotus purpuratus GN=SPU_010551gn PE=4 SV=1	SPAC2F3.13c_2	139	4e-33	COG0526	Thiol-disulfide isomerase and thioredoxins	OC	Posttranslational modification, protein turnover, chaperones ; Energy production and conversion ;	-	-	-
6	Unigene15262_All	192 932 hypothetical protein THAOC_27572, partial [Thalassiosira oceanica]	33429	KADKEYELLVVTVATEETDGFKRFLRSTDKYDVNVKVVGMGEEWTGGDIVNWPGGGQKINLLKTALEEYKDRDDLILLFSDSYDVIFTTGAEEIIRKFQEMDANLVISAESSIWPDPTLASQYPEPEVGYPFVCSGLYMGYAPYFWSALTYRDIADKDDDQLFYTQLYLDSSRREEWKIKLDHVASLFMNLNGARDDVKLLFEGANSMLQNTKYRTVPAIIHGNGPSKLYLNQLGNYLANYWTQDKG	37	14.6	-	3	3	2	2	---	---	---	1	1	1	-	-	-	Unigene15262_All	54.92	1e-65	gi|380020387|ref|XP_003694068.1|	PREDICTED: procollagen-lysine,2-oxoglutarate 5-dioxygenase 3-like [Apis florea]	48.55	1e-66	sp|Q811A3|PLOD2_RAT	Procollagen-lysine,2-oxoglutarate 5-dioxygenase 2 OS=Rattus norvegicus GN=Plod2 PE=2 SV=1	56.31	8e-25	E1G426	E1G426_LOALO Procollagen-lysine,2-oxoglutarate 5-dioxygenase 2 OS=Loa loa GN=LOAG_07908 PE=4 SV=1	-	-	-	-	-	-	-	K13647|1|1e-73|276|nve:NEMVE_v1g234891|procollagen-lysine,2-oxoglutarate 5-dioxygenase, invertebrate [EC:1.14.11.4]!K13646|2|1e-72|272|cin:100178986|lysyl hydroxylase/galactosyltransferase/glucosyltransferase [EC:1.14.11.4 2.4.1.50 2.4.1.66]!K13645|5|1e-67|256|dre:100036767|procollagen-lysine,2-oxoglutarate 5-dioxygenase 2 [EC:1.14.11.4]	-	GO:0016705//oxidoreductase activity, acting on paired donors, with incorporation or reduction of molecular oxygen;GO:0051213//dioxygenase activity	-
7	Unigene5459_All	129 692 minus strand predicted protein [Populus trichocarpa]	23781	KTVVVTGFGPFAEHRVNASWAAVQEMSKLDLPDYLSVIPVEMPVEYKAVDEIVPLIWARYKPDLVIHIGVSSIAAELTLEQQGHNNGYDKLDISSMLPKAPVCKENGPDCILSRIDMSRVCRDINSSDCNVKAVVSYCAGRYLCGYAYYTSLYQNPTCSAFIHVPPLGGPYSAQQLALGIREALLSML	177	19.1	-	9	9	3	3	0.995	0.987	0.961	6	7	7	-	-	-	Unigene5459_All	57.07	9e-57	gi|115638531|ref|XP_786904.2|	PREDICTED: pyroglutamyl-peptidase 1-like [Strongylocentrotus purpuratus]	50.53	3e-51	sp|Q9NXJ5|PGPI_HUMAN	Pyroglutamyl-peptidase 1 OS=Homo sapiens GN=PGPEP1 PE=1 SV=1	56.45	6e-13	H9F1L3	H9F1L3_MACMU Pyroglutamyl-peptidase 1 (Fragment) OS=Macaca mulatta GN=PGPEP1 PE=2 SV=1	YPO2703	67.8	1e-11	COG2039	Pyrrolidone-carboxylate peptidase (N-terminal pyroglutamyl peptidase)	O	Posttranslational modification, protein turnover, chaperones ;	K01304|1|1e-57|222|spu:581828|pyroglutamyl-peptidase [EC:3.4.19.3]	GO:0006508//proteolysis	GO:0008233//peptidase activity	GO:0005829//cytosol
8	CL10326.Contig1_All	1 484 LEN=484; translated	22051	XGLGCTGSKTTSQDALKRAEEAEKEFERKLKESENTLTDVKDLQVNTEEALAIAQEAYDASLQAKMDAEGAKTNLTDLIEDIMDFLLTNRAHPDSIRDIAEMALGTQMSRTPEEIKELAEQIEDTVAGLKNIDDILNETRDDLRLVQELKARADKARDFAEX	24	6.2	-	1	1	1	1	---	---	---	1	1	1	-	-	-	CL10326.Contig1_All	54.63	1e-24	gi|291244980|ref|XP_002742373.1|	PREDICTED: laminin, beta 2-like [Saccoglossus kowalevskii]	36.25	6e-16	sp|Q61292|LAMB2_MOUSE	Laminin subunit beta-2 OS=Mus musculus GN=Lamb2 PE=2 SV=2	53.04	5e-24	H3HQ71	H3HQ71_STRPU Uncharacterized protein OS=Strongylocentrotus purpuratus GN=SPU_003822gn PE=4 SV=1	-	-	-	-	-	-	-	K05636|1|3e-27|120|spu:582206|laminin, beta 1!K06243|3|5e-16|83.6|rno:25473|laminin, beta 2	GO:0031175//neuron projection development;GO:0048513//organ development;GO:0000904//cell morphogenesis involved in differentiation	GO:0005488//binding	GO:0043256//laminin complex
9	Unigene27529_All	234 1694 minus strand hypothetical protein PHYSODRAFT_259933 [Phytophthora sojae]	61169	GSVQLNKTVDTFLGIPYAEPPIGDLRFRKPVPKSPWTDSLNATMDRPMCWQAPVELPGLPPQDEDCLYLNIWSPDVQLEGLPVMVWIHGGAFVFGSGSGPYYEGLPLAAFHDVVVVTLNYRLSVFGFLFANEASPGNYGIFDQNMAMRWVKDNIEAFGGDPNQITIFGQSAGGASVGIHLLAEQSQDLYNRAILMSGSMIHPWGVELDKAKALSDTDRLRQNVLQCRNVMVDQDFVECLRKRSAPTLILAALTTLAQVISINIPFVPLVDGDIIKENPFKLLDQGKFKQCDIMTGATKDDGSLVALLPFLLQIASDDPYANFTEFQSFLGESTYVYDTPQVNKAIEQEYVDWSMVDEPSTNYFETYVKLATDEAFYCPCDEVSRQFTKRGNAVYKYLFN…	24	3.7	-	1	1	1	1	---	---	---	1	1	1	-	-	-	Unigene27529_All	45.33	1e-110	gi|72064533|ref|XP_780403.1|	PREDICTED: acetylcholinesterase-like [Strongylocentrotus purpuratus]	50.83	2e-29	sp|P32750|CHLE_CANFA	Cholinesterase (Fragment) OS=Canis familiaris GN=BCHE PE=2 SV=1	45.33	4e-110	H3HR75	H3HR75_STRPU Uncharacterized protein OS=Strongylocentrotus purpuratus GN=SPU_004181gn PE=4 SV=1	BS_pnbA	217	3e-56	COG2272	Carboxylesterase type B	I	Lipid transport and metabolism ;	K01050|1|2e-82|306|xtr:100495889|cholinesterase [EC:3.1.1.8]!K01049|2|2e-82|306|aga:AgaP_AGAP001356|acetylcholinesterase [EC:3.1.1.7]	-	GO:0016787//hydrolase activity	-
10	CL7508.Contig1_All	328 819 hypothetical protein SELMODRAFT_115600 [Selaginella moellendorffii] >gi|302802335|ref|XP_002982923.1| hypothetical protein SELMODRAFT_117176 [Selaginella moellendorffii] >gi|300149513|gb|EFJ16168.1| hypothetical protein SELMODRAFT_117176	22714	ATFALSUFWFPEAQFGCAPGVVRTRVGYTGGDKKLPTYYSMGDHTETVDLEFDPSETSYEDLLTMFWNNHDSTSCHNRQYMSAIFFHGEEQKALAEKTRDEHQKTLKRKIQTVIKPAETFYDAEDYHQKYMLRQHRSLLQSLNFAPKELIKSHSAARLNGYVAG	178	15.2	-	5	5	2	2	1.002	1.037	0.523	5	5	5	-	-	*	CL7508.Contig1_All	68	3e-50	gi|291222741|ref|XP_002731373.1|	PREDICTED: methionine sulfoxide reductase A-like [Saccoglossus kowalevskii]	47.31	2e-32	sp|P08761|MSRA_DROME	Peptide methionine sulfoxide reductase OS=Drosophila melanogaster GN=Eip71CD PE=2 SV=2	64.97	2e-49	A7RPZ4	A7RPZ4_NEMVE Predicted protein (Fragment) OS=Nematostella vectensis GN=v1g89574 PE=4 SV=1	MTH535	111	5e-25	COG0225	Peptide methionine sulfoxide reductase	O	Posttranslational modification, protein turnover, chaperones ;	K07304|1|6e-51|199|nve:NEMVE_v1g89574|peptide-methionine (S)-S-oxide reductase [EC:1.8.4.11]	GO:0008152//metabolic process	GO:0016491//oxidoreductase activity	-
11	CL1609.Contig2_All	189 3692 minus strand hypothetical protein AURANDRAFT_55296 [Aureococcus anophagefferens]	161180	LEELPLPDQQPCIEAAALSITYQPNFDTNFEDRTAFVTGIAKYTEEATVHSELNKLLDEGETYAVTLYTWRSCSRAMPAIKSNQQPNRVEIYQKFVEVMEPEVAKLVNFMYFQQRAIDVFCRDIKRLCHSERRKDFVSEAYLLTLGKLINMFAVLDALKNIKSSIRNDYAAYRRAAQFLRVMADPKTLKESQEVVMFLANNDQITNTLKQNIIKIECYEDLLCEIVNLCIDHFEGMHYVLPAEKHMLVKVIAFGLFLMDGKDLSIYKMDQKKKISLSRVDKVFKQLAVVPLYGDIQIPVFTYITKSENYANNKSVWTCDHAATPQYNIIERLPSLREEHAKYISALARHSNKEVTTAQKDTARSEKENVALYNLALQGLRLLSRWTSVLTELFSWKLIH…	202	7.3	-	15	15	7	7	0.732	0.808	0.861	13	13	13	*	-	-	CL1609.Contig2_All	78.79	3e-06	gi|241634358|ref|XP_002410511.1|	hypothetical protein IscW_ISCW009439 [Ixodes scapularis] >gi|215503440|gb|EEC12934.1| hypothetical protein IscW_ISCW009439 [Ixodes scapularis]	64.7	0	sp|Q5SQX6|CYFP2_MOUSE	Cytoplasmic FMR1-interacting protein 2 OS=Mus musculus GN=Cyfip2 PE=1 SV=2	77.78	1e-14	H3J7D2	H3J7D2_STRPU Uncharacterized protein OS=Strongylocentrotus purpuratus GN=SPU_022438gn PE=4 SV=1	-	-	-	-	-	-	-	K05749|1|0.0|1612|bta:518833|cytoplasmic FMR1 interacting protein	GO:0016337//cell-cell adhesion;GO:0006915//apoptotic process;GO:0010842//retina layer formation;GO:0031290//retinal ganglion cell axon guidance	GO:0005515//protein binding	GO:0030054//cell junction;GO:0043005//neuron projection;GO:0045202//synapse;GO:0048471//perinuclear region of cytoplasm
12	Unigene4280_All	143 1879 acetolactate synthase large subunit [Galdieria sulphuraria]	73414	NGGDIVAEVLKAHGVKFLFTLCGGHISPINVAAEREGIRVIDTRHEVTAVFAADAVARMTGAIGAAVVTAGPGLTNTITAVKNAQMAETPVLLMGGAAVTLLKGRGALQDIDQMSLFKPLCKFCAAVQTVRDIAPVLREAIRVAQSDTPGPVFVEFPIDVLYDYQNVLMGVGLNSPKGDLMSKIVNMYTMSHVGNIFAGGFELREYGPLPVDRPIASSGQVQQAVELVSRAKKPLIILGSQATLPPTPVDELRKALEAMGIPCFLGGMTRGMLGRNSPLHIRQRRRDALKEADVVILAGAVPDFRLNYGRVLSKRSKIIAVNRNKSQLLLNAGVMWRPALAVQADVGSFLLEVSKGLTGFNCSSEWIQSLKARDEEKETSNLKKAEDKVNHFLNPLKVL…	107	11.6	-	4	4	4	4	0.965	1.34	1.103	4	4	4	-	-	-	Unigene4280_All	74.85	5e-61	gi|459183602|ref|XP_004227082.1|	PREDICTED: acetolactate synthase-like protein-like [Ciona intestinalis]	67.59	0	sp|Q6NV04|ILVBL_DANRE	Acetolactate synthase-like protein OS=Danio rerio GN=ilvbl PE=2 SV=1	74.85	3e-60	F6SE92	F6SE92_CIOIN Uncharacterized protein OS=Ciona intestinalis GN=CIN.40773 PE=4 SV=2	ML2083	268	2e-71	COG0028	Thiamine pyrophosphate-requiring enzymes [acetolactate synthase, pyruvate dehydrogenase (cytochrome), glyoxylate carboligase, phosphonopyruvate decarboxylase]	EH	Amino acid transport and metabolism ; Coenzyme transport and metabolism ;	K11259|1|0.0|776|bfo:BRAFLDRAFT_279682|acetolactate synthase-like protein [EC:2.2.1.-]	-	GO:0046872//metal ion binding;GO:0003824//catalytic activity	GO:0016020//membrane
13	Unigene8588_All	441 707 flowering locus T-like 2 [Oxybasis rubra]	11584	GNVITPTEALTPPTVHYDCDAGNLWTLLMVNPDGHLIYNDAEYVHWMIGNIPDEKLSEGDTIFDYLPVFPAKGTGYQRIVFLLFKQDGK	41	7.9	-	2	2	1	1	2.026	0.851	0.81	2	2	2	*	-	-	Unigene8588_All	60.23	5e-28	gi|260798174|ref|XP_002594075.1|	hypothetical protein BRAFLDRAFT_118800 [Branchiostoma floridae] >gi|229279308|gb|EEN50086.1| hypothetical protein BRAFLDRAFT_118800 [Branchiostoma floridae]	57.47	3e-26	sp|Q3ZBF3|RM38_BOVIN	39S ribosomal protein L38, mitochondrial OS=Bos taurus GN=MRPL38 PE=1 SV=2	60.23	2e-27	C3ZB49	C3ZB49_BRAFL Putative uncharacterized protein OS=Branchiostoma floridae GN=BRAFLDRAFT_118800 PE=4 SV=1	-	-	-	-	-	-	-	-	-	-	GO:0044444//cytoplasmic part;GO:0043232//intracellular non-membrane-bounded organelle
14	Unigene15636_All	10 708 minus strand hypothetical protein GUITHDRAFT_68941 [Guillardia theta CCMP2712]	32436	IMMDKNGKLIQSFENKDWYFYPYSIAMHKQCYYVTAMKGQVVIMYQANGKEVRRFGGDVLKRPTGIALDKEGNIYVADNQLSKILLFGPDGKFKEYVISTEPSRQTMSLNNPWFIKFNSKGQLIIADFENQRIQVINVQTGREIMSIMVMHEGQKMYCRGVDVDRHDNIYVGARADKSGNPAEGIFVYGPDGTYLGSLPAKDLHWSRGIHIAKDGQHDVLYVVDSSHKSVRTF	51	3.9	-	4	4	1	1	1.321	0.961	1.214	2	2	2	-	-	-	Unigene15636_All	36.68	8e-31	gi|390338474|ref|XP_001199500.2|	PREDICTED: tripartite motif-containing protein 3-like [Strongylocentrotus purpuratus]	28.32	2e-06	sp|A4IF63|TRIM2_BOVIN	Tripartite motif-containing protein 2 OS=Bos taurus GN=TRIM2 PE=2 SV=1	37.2	8e-28	H3HP19	H3HP19_STRPU Uncharacterized protein OS=Strongylocentrotus purpuratus GN=SPU_003417gn PE=4 SV=1	-	-	-	-	-	-	-	K11997|1|2e-13|76.3|spu:583781|tripartite motif-containing protein 2/3	-	-
15	Unigene18610_All	96 1616 minus strand PREDICTED: centromere/kinetochore protein zw10 homolog [Fragaria vesca subsp. vesca]	70221	QLLNMLEAMQVMDVLGWRLKSFAKLFKETLIDAIILDPSSDVTVSQAKQEVSLRVTSTDGKNLVKPPQEMFAQLQKALECIQKLFSRCRFDEDGESQSLMKMLGNLLWGELSKSLINHCLMPSIPTLAADLEDYKTTISATQQFEESLRKLDFIGHEKPLLEYAENVNIHFATKKCQEILVMARDLMKQDLYTSVEVGKRKTEKKKISEFFPACKISKSTQDLLELAEETLRQASSKGAAPLFCTVRNLFGMYVDIVPTYHKETLRDLPQVTALFHNNCMYLAHHLKTLGHRCRHTLPTPFRDSIITFVDLVPTFTRMAADVFLSQMRNQRDQLKESLAMARGFQDVSSDDVYPDAEKSVKQVLHQLNLLHTVWSDVLPSSTFIKAMATLIGAVLQDVI…	34	2.6	-	2	2	1	1	0.92	0.926	0.688	2	2	2	-	-	-	Unigene18610_All	47.88	4e-66	gi|2661220|gb|AAB88256.1|	MmZW10 [Mus musculus]	39.75	2e-107	sp|Q5RFM4|ZW10_PONAB	Centromere/kinetochore protein zw10 homolog OS=Pongo abelii GN=ZW10 PE=2 SV=3	47.3	3e-32	G5ATK8	G5ATK8_HETGA Ras GTPase-activating-like protein IQGAP2 OS=Heterocephalus glaber GN=GW7_20437 PE=4 SV=1	-	-	-	-	-	-	-	K11578|1|2e-124|446|spu:584335|centromere/kinetochore protein ZW10	GO:0007080//mitotic metaphase plate congression;GO:0006461//protein complex assembly;GO:0034501//protein localization to kinetochore;GO:0006888//ER to Golgi vesicle-mediated transport;GO:0007096//regulation of exit from mitosis;GO:0007093//mitotic cell cycle checkpoint;GO:0000132//establishment of mitotic spindle orientation	GO:0005515//protein binding	GO:0000922//spindle pole;GO:0000776//kinetochore;GO:0005828//kinetochore microtubule;GO:0005783//endoplasmic reticulum;GO:0005634//nucleus
16	CL11379.Contig1_All	264 989 PREDICTED: zinc-binding alcohol dehydrogenase domain-containing protein 2 [Vitis vinifera] >gi|297741296|emb|CBI32427.3| unnamed protein product [Vitis vinifera] >CL11379.Contig2_All 680 1405 PREDICTED: zinc-binding alcohol dehydrogena	31067	GAVALVTGGAMGIGKEVVETLLQKGVKLCNILDFNEEVGAAVAGEFQKSYGADKVNFIKCDVSSREQLQDAFKKTQASHGRLDIVCNNAGVQTEDEGNFEKSIQINLIGSMYGTLLAKDIMMKENNPPGGVIVNTASMAGILPAFYSPFYAASKHGVVGFTRSLAQHPFIKKANVRLNLICPSFVETAMVTRAREGAPILQAVVSKANIVPMSDVMKAFLMAIEDDSLTGQAIRVTPGGGVD	42	8.3	-	2	2	2	2	0.787	0.948	0.822	2	2	2	-	-	-	CL11379.Contig1_All	47.88	1e-36	gi|197101813|ref|NP_001125858.1|	15-hydroxyprostaglandin dehydrogenase [Pongo abelii] >gi|224922801|ref|NP_001139288.1| 15-hydroxyprostaglandin dehydrogenase [NAD(+)] isoform 2 [Homo sapiens] >gi|119625142|gb|EAX04737.1| hydroxyprostaglandin dehydrogenase 15-(NAD), isoform CRA_c [Homo sapiens]	40.8	8e-47	sp|Q8MJY8|PGDH_MACFA	15-hydroxyprostaglandin dehydrogenase [NAD(+)] OS=Macaca fascicularis GN=HPGD PE=2 SV=1	47.88	4e-36	F6U1R1	F6U1R1_MACMU Uncharacterized protein OS=Macaca mulatta GN=Mmu.1216 PE=3 SV=1	PAB1085	110	2e-24	COG1028	Dehydrogenases with different specificities (related to short-chain alcohol dehydrogenases)	IQR	Lipid transport and metabolism ; Secondary metabolites biosynthesis, transport and catabolism ; General function prediction only ;	K00069|1|7e-56|217|spu:591898|15-hydroxyprostaglandin dehydrogenase (NAD) [EC:1.1.1.141]	GO:0006693//prostaglandin metabolic process;GO:0007567//parturition;GO:0007565//female pregnancy;GO:0007179//transforming growth factor beta receptor signaling pathway;GO:0060206//estrous cycle phase;GO:0045786//negative regulation of cell cycle	GO:0004957//prostaglandin E receptor activity;GO:0016404//15-hydroxyprostaglandin dehydrogenase (NAD+) activity;GO:0070403//NAD+ binding	GO:0005730//nucleolus;GO:0005737//cytoplasm
17	Unigene4704_All	398 1678 minus strand [ribulose-bisphosphate carboxylase]-lysine N-methyltransferase [Arabidopsis thaliana] >gi|17369870|sp|Q9XI84.1|RBCMT_ARATH RecName: Full=[Fructose-bisphosphate aldolase]-lysine N-methyltransferase, chloroplastic; AltName: F	57748	DHVEAFTTWVKENGVSMDKVKVAEYGEEGFGLQATDDIKADEVFLCIPRKMMITDENVKASNLGPLVKSDRILSTMPHVALALFLLGGKVTEESFWKPYIDLLPRHYSMPLYFSPEELQLLKGSHTFGEALKQHKNIARQYAYFYKLFQTNSGASKLPIRDRFTYNSYRWAVCTIMSRQNQIPDSSGSRLLTALIPKWDMCNHANGTITTGYNFQNSTSESVSERDFANGEQLYIFYGARPNAHFLLYSGFVYPENEHDTIAIQLGVSKNDRLYAMKSQILAMLRMSEPSHTFYIQKSIEPISVELWAFLRVFSMDEEQLKALLLGPRSQELMANLIRPNRLVSKENERKVWSFLDVRLRLLHQQYQSTEESIQEGPESEKLSYNSKLCMKLRQCEREV…	40	1.9	-	3	3	1	1	0.938	1.084	0.712	3	3	3	-	-	-	Unigene4704_All	52.56	3e-44	gi|26325362|dbj|BAC26435.1|	unnamed protein product [Mus musculus]	48.64	6e-111	sp|B1MTJ4|SETD3_CALMO	Histone-lysine N-methyltransferase setd3 OS=Callicebus moloch GN=SETD3 PE=3 SV=2	53.59	5e-62	H3AYZ7	H3AYZ7_LATCH Uncharacterized protein OS=Latimeria chalumnae PE=4 SV=1	-	-	-	-	-	-	-	K05662|1|2e-12|73.9|nvi:100122061|ATP-binding cassette, subfamily B (MDR/TAP), member 7!K05302|2|3e-12|73.6|xtr:100125156|SET domain-containing protein 6	GO:0016568//chromatin modification;GO:0006355//regulation of transcription, DNA-dependent;GO:0018022//peptidyl-lysine methylation	GO:0018024//histone-lysine N-methyltransferase activity	-
18	CL920.Contig1_All	210 638 hypothetical protein VOLCADRAFT_107661 [Volvox carteri f. nagariensis] >gi|300257249|gb|EFJ41500.1| hypothetical protein VOLCADRAFT_107661 [Volvox carteri f. nagariensis]	18840	FYDPSFDTFQKSKIMASRVVRTIINTAKAPKAIGPYNQAVAVGSTVYLSGQVGIDPGTGNMVEGGIEPEAHQVFKNISEVLTAAGLTFKDVVKCTVLLASMDDYATINKIYGTYFTDKFPARAAYQTAGLPKNARVEIECIAV	728	25.9	2	25	25	3	3	0.874	0.967	1.022	23	22	23	-	-	-	CL920.Contig1_All	60.87	2e-08	gi|327269577|ref|XP_003219570.1|	PREDICTED: ribonuclease UK114-like [Anolis carolinensis]	59.84	2e-39	sp|Q3T114|UK114_BOVIN	Ribonuclease UK114 OS=Bos taurus GN=HRSP12 PE=2 SV=3	65.89	5e-41	H3FQS8	H3FQS8_PRIPA Uncharacterized protein OS=Pristionchus pacificus GN=PPA24646 PE=4 SV=1	HP0944	132	2e-31	COG0251	Putative translation initiation inhibitor, yjgF family	J	Translation, ribosomal structure and biogenesis ;	-	GO:0006449//regulation of translational termination	GO:0004518//nuclease activity	GO:0005739//mitochondrion;GO:0005730//nucleolus
19	Unigene29593_All	6 1112 hypothetical protein THAOC_15837, partial [Thalassiosira oceanica]	48982	EPALLSRYPLEDYPEFSLPDSVSKFCMPLGATIECWPKGHTHPLPLFSTFVLTDQGGAKVYGAGVTFYESYPENNLTDQQRESFHMKESQSYSIHTNKCICILSRWPFFDAFKKFLTFIYRLSLSGPLTVPIERYIAHFMHEVPFPTPQRPRIFMQLGHSSLVLAQPQTSPLPLSGASYCALLQNLGPETCLNLLTYVLLENKILLHSLRPALLTAVAEAVSSMIFPFVWQCPYVPLCPLFLAMTLNAPFPVIFGIDSRYFDKYDPPTDATCVDIDTNTILLPDDKKGMSWKILPKKPAKKLLSMLASLHREVLRTGIGDSVSDDLAIEMAPLDDDFNKKRNQIILELKIQDAFLIFMASIMKDYNKYL	80	2.7	-	2	2	1	1	0.428	1.085	0.906	2	2	2	-	-	-	Unigene29593_All	66.67	2e-14	gi|390340596|ref|XP_795361.3|	PREDICTED: C-myc promoter-binding protein [Strongylocentrotus purpuratus]	58.13	2e-118	sp|Q7Z401|MYCPP_HUMAN	C-myc promoter-binding protein OS=Homo sapiens GN=DENND4A PE=1 SV=2	61.54	7e-61	Q3TZ11	Q3TZ11_MOUSE Putative uncharacterized protein (Fragment) OS=Mus musculus GN=Dennd4a PE=2 SV=1	-	-	-	-	-	-	-	K12861|1|1e-07|57.8|gga:419884|pre-mRNA-splicing factor SPF27	GO:0006355//regulation of transcription, DNA-dependent	GO:0003677//DNA binding	GO:0005634//nucleus
20	Unigene3831_All	257 1066 LEN=2151; minus strand; translated	34617	VDLSAFLVQRETINGHGKHLFIEQISPGGILYHGGIRHSDRLISVNKVPVEQFSFDLILESIRSLSVIALAVERKVNGKVVPIVVILEIGFKSDGNPYLEFGGFYWNSDYADIEPFIPLEVPSLNTYQYSGKQENVRFVVTEGNKQLWLEVDGDDIEFTESNGSLTSFTMYKYDPTRSPTNSQVVILVPTDQPCFCLAAKKDNDLVLWPFDETVYTGGEPIPDNASFLELVPQDGNEYKIESTVNNGWYITNDDMKAVMTTTGSLFKIES	74	15.6	-	4	2	3	1	---	---	---	-	-	-	-	-	-	Unigene3831_All	-	-	-	-	-	-	-	-	-	-	-	-	-	-	-	-	-	-	-	-	-	-
21	Unigene4417_All	1 779 LEN=1541; minus strand; translated	32954	XLDYIQFRYKCFQISNLQPFARKHXLRMATSPDSKTDMADTTQQHVNMQQVGYPNYGSQQPTVIVTNPPPPAYNHPVPNNVQYGYQTPEQSCCQPSQETAVDIESAATGQLEDFFEMKPHLKVDFNGVFQEPKDAGGVSFVTTYNTTIYYWTKRCLYIFLVCILGPIMAFSFGLVFALMDFLSIWCVNPSVRLLHVMLRFTSNAYRPLTRILLDPIFESFGQVYRVRNSGVFTERKYKLDVTGITLGGGGESEHQHTSXQ	60	8.5	-	3	3	2	2	---	---	---	-	-	-	-	-	-	Unigene4417_All	41.59	7e-19	gi|390354960|ref|XP_001180082.2|	PREDICTED: caveolin-2-like [Strongylocentrotus purpuratus]	32.46	5e-08	sp|Q9YGM8|CAV1_TAKRU	Caveolin-1 OS=Takifugu rubripes GN=cav1 PE=3 SV=1	41.59	3e-18	H3J359	H3J359_STRPU Caveolin OS=Strongylocentrotus purpuratus GN=SPU_020949gn PE=3 SV=1	-	-	-	-	-	-	-	K06278|1|4e-11|68.9|cin:100177697|caveolin 1	-	-
22	Unigene55589_All	1 268 LEN=268; translated	13523	XFRLQHNILIGEMRTDLTEWELKNSNNLSSATKDEFFRKVNIEIKSKCETVNEKIDEYVKAHNDEAEVNRRQQSVKRDTFDIDRDIQRAX	16	6.7	-	1	1	1	1	---	---	---	-	-	-	-	-	-	Unigene55589_All	-	-	-	-	-	-	-	-	-	-	-	-	-	-	-	-	-	-	-	-	-	-
23	Unigene26008_All	238 1188 minus strand putative GDP-L-fucose synthetase [Coccomyxa subellipsoidea C-169]	43700	PRQGKVILVTGSSGLVGKAIQKVAEEDPRPDERFVFISSKDADLTSAAETAALFEKHHPTHVIHLAAMVGGLFRNLKYNLDFWRNNSLMNDNVLHNAHLHDVEKVVSCLSTCIFPDKTTYPIDETMIHNGPPHDSNFGYAYAKRMIDVQNKGYFVQHKRRYTSVIPTNVFGPHDNFNLEDGHVIPGLMNKVYNAKKDGTPFTIWGTGAPLRQFIYSIDLARLFLWVLREYDEVDPIILSVGEEDEVSIKEVAENIIKAFNFTGEVIYDTSKSDGQFKKTASNAKLRKYLPDFKFTPLETAVKETVDWFTENYETARK	359	22.4	-	18	18	7	7	1.155	0.875	1.259	16	15	15	-	-	*	Unigene26008_All	78.18	1e-17	gi|913089|gb|AAB32949.1|	nicotinamide adenine dinucleotide phosphate (NADP[H])-binding protein FX [human, erythrocytes, Peptide Partial, 54 aa, segment 2 of 3]	73.58	2e-138	sp|Q13630|FCL_HUMAN	GDP-L-fucose synthase OS=Homo sapiens GN=TSTA3 PE=1 SV=1	77.78	1e-106	H3IKZ0	H3IKZ0_STRPU Uncharacterized protein (Fragment) OS=Strongylocentrotus purpuratus GN=SPU_014789gn PE=4 SV=1	sll1213	185	7e-47	COG0451	Nucleoside-diphosphate-sugar epimerases	MG	Cell wall/membrane/envelope biogenesis ; Carbohydrate transport and metabolism ;	K02377|1|3e-146|518|xtr:394680|GDP-L-fucose synthase [EC:1.1.1.271]	GO:0042351//'de novo' GDP-L-fucose biosynthetic process;GO:0019835//cytolysis;GO:0055114//oxidation-reduction process	GO:0050577//GDP-L-fucose synthase activity;GO:0016853//isomerase activity;GO:0050662//coenzyme binding;GO:0000166//nucleotide binding	-
24	Unigene22539_All	1 2553 minus strand hypothetical protein COCSUDRAFT_58179 [Coccomyxa subellipsoidea C-169]	108222	LTQKQWEELLVNSGFELLSVFADNVASSLFLCRKKYTAPLSKDRFIKVSSEKYDWVEEVKDSLVKSEDPATETGRIWLVADGQHYNGIVGMVNCLRQEDGGKNIRCIFNASSGCMPDISIGSITMETLSSKDLVMNVYQKGGVWGSYRHQFLQEAEQFVETSDAYVNVLTRGDLSSLRWIKSPQTTSSDQQDCSHSRCSVYFSSLNFRDIMLATGKLPPDALPAELAQKECILGLEFSGRDPEGKRIMGLVPSNGLATSVLAESHLLFEIPDSWSLEDAATVPVVYCTAYYALVVRGQLRRGESVLIHSGSGGVGQAAIAIALSYDCRVFTTVGTKEKREFLKKKFPALTEDAFANSRDLSFEEHVMRQTKGSGVNLVLNSLAGEKLEASLRCLSMHGR…	165	4.7	-	8	8	3	3	1.039	0.917	0.502	8	8	8	-	-	*	Unigene22539_All	68.22	8e-93	gi|257412309|gb|ACV53190.1|	fatty acid synthase [Cyprinus carpio]	55.69	0	sp|P12276|FAS_CHICK	Fatty acid synthase OS=Gallus gallus GN=FASN PE=1 SV=5	68.22	3e-92	C9E7A1	C9E7A1_CYPCA Fatty acid synthase (Fragment) OS=Cyprinus carpio PE=2 SV=1	SMc02273	282	2e-75	COG3321	Polyketide synthase modules and related proteins	Q	Secondary metabolites biosynthesis, transport and catabolism ;	K00665|1|0.0|921|acs:100563002|fatty acid synthase, animal type [EC:2.3.1.85]	-	-
25	CL8790.Contig2_All	108 1088 unknown [Picea sitchensis]	44885	MARKTWDVSNNIETVQSIDEIYKYDKQQQQEVLAAKPWSKDNHYFKHIKISALALLKMVMHARSGGTLEVMGLLMGKVDGATMIVMDCFALPVEGTETRVNAQAAAYEYMAAYMESSKQVGRLENAIGWYHSHPGYGCWLSGIDVGTQMLNQQFQEPFVAIVIDPVRTISAGKVNLGAFRTYPKGYKPPDEGPSEYQTIPLNKIEDFGVHCKQYYSLEVSYFKSALDRKLLESLWNKYWVNTLSSSTLVTNAYYTTGQISDLSEKLENSESQLGRGAFMLASDHDKKAEDKLSKATRDSCKTTIEVIHGQIAQVIKNRLFNQVNVSS	143	9.5	-	6	6	3	3	0.934	1.153	0.846	4	4	4	-	-	-	CL8790.Contig2_All	90.76	2e-90	gi|291228208|ref|XP_002734071.1|	PREDICTED: COP9 signalosome subunit 5-like, partial [Saccoglossus kowalevskii]	84.1	4e-161	sp|Q92905|CSN5_HUMAN	COP9 signalosome complex subunit 5 OS=Homo sapiens GN=COPS5 PE=1 SV=4	92.05	5e-71	E5RHF2	E5RHF2_HUMAN COP9 signalosome complex subunit 5 (Fragment) OS=Homo sapiens GN=COPS5 PE=4 SV=1	SPAC1687.13c	249	4e-66	COG1310	Predicted metal-dependent protease of the PAD1/JAB1 superfamily	R	General function prediction only ;	K09613|1|3e-161|568|cfa:477901|COP9 signalosome complex subunit 5 [EC:3.4.-.-]	GO:0006413//translational initiation;GO:0010388//cullin deneddylation;GO:0051726//regulation of cell cycle;GO:0045944//positive regulation of transcription from RNA polymerase II promoter;GO:0006508//proteolysis;GO:0046328//regulation of JNK cascade	GO:0005515//protein binding;GO:0003743//translation initiation factor activity;GO:0046872//metal ion binding;GO:0003713//transcription coactivator activity;GO:0008237//metallopeptidase activity	GO:0005852//eukaryotic translation initiation factor 3 complex;GO:0005730//nucleolus;GO:0005667//transcription factor complex;GO:0008180//signalosome
26	Unigene15108_All	203 1561 minus strand hypothetical protein AURANDRAFT_22237 [Aureococcus anophagefferens]	58966	PNIIFMLMDDMGWGDLGVYGHPAKETPNLDRMAAEGTLLPDFYAGNPLCSPSRASFLTGRLPIRNGFYSDNAHARNAYTPQNIVGGIPDCEILLPEILNKAGYRSKIIGKWHLGHQDQFLPLKHGFDEFFGSTNCHFGPYDDKGTPNIPVFQDSEMIGRYYEEFEINLKTGESNMTQMFLQEGLNFILNQASSQRPFFLYWTPDATHDPPYASKDFLGKSQRGLYGDAVMELDDSVGKILALLKDLKIDSNTFVFFMSDNGAATYAKEKGGSNGPFLCGKETTFEGGMREPSIAWWPAHIQPGMISHQIGSIMDIFTTSVELAGLKIPQDRIIDGKSLLPSLVKQEMDLNKTMFYYRGNEMMAVRQGLYKAHYWTWTNSIQEFHQAHVDFCPGENVTGI…	127	5.5	-	22	10	3	2	47.875	1.724	37.03	9	9	9	-	-	-	Unigene15108_All	78.12	3e-74	gi|296231792|ref|XP_002761310.1|	PREDICTED: N-acetylgalactosamine-6-sulfatase [Callithrix jacchus]	67.99	0	sp|Q571E4|GALNS_MOUSE	N-acetylgalactosamine-6-sulfatase OS=Mus musculus GN=Galns PE=2 SV=2	80.18	2e-48	H2QBQ8	H2QBQ8_PANTR Uncharacterized protein OS=Pan troglodytes GN=GALNS PE=4 SV=1	SMa1683	190	4e-48	COG3119	Arylsulfatase A and related enzymes	P	Inorganic ion transport and metabolism ;	K01132|1|0.0|650|gga:415848|N-acetylgalactosamine-6-sulfatase [EC:3.1.6.4]	GO:0042340//keratan sulfate catabolic process;GO:0005975//carbohydrate metabolic process;GO:0044281//small molecule metabolic process	GO:0046872//metal ion binding;GO:0043890//N-acetylgalactosamine-6-sulfatase activity;GO:0003943//N-acetylgalactosamine-4-sulfatase activity	GO:0043202//lysosomal lumen
27	Unigene28843_All	1 307 LEN=307; translated	14080	IAYYLIIDNKRMMSEAEKSQMKEFYLASSPPPRDSFLEMPPENFPTVVKLHPERVNALTLNSLDNINPTAHDVQRRMATPVKRSKWHLGIRSQSRPHDIMSEX	45	9.7	-	2	2	1	1	1.151	1.104	0.858	2	2	2	-	-	-	Unigene28843_All	70.45	2e-10	gi|72172570|ref|XP_797954.1|	PREDICTED: 5'-AMP-activated protein kinase catalytic subunit alpha-1-like [Strongylocentrotus purpuratus]	48.15	2e-16	sp|P54645|AAPK1_RAT	5'-AMP-activated protein kinase catalytic subunit alpha-1 OS=Rattus norvegicus GN=Prkaa1 PE=1 SV=2	79.49	1e-10	H3J1G5	H3J1G5_STRPU Uncharacterized protein OS=Strongylocentrotus purpuratus GN=SPU_020338gn PE=4 SV=1	-	-	-	-	-	-	-	K07198|1|2e-19|94.4|dre:100001198|5'-AMP-activated protein kinase, catalytic alpha subunit [EC:2.7.11.11]	-	GO:0004672//protein kinase activity	-
28	CL12581.Contig1_All	5 397 hypothetical protein SELMODRAFT_447032 [Selaginella moellendorffii] >gi|300144693|gb|EFJ11375.1| hypothetical protein SELMODRAFT_447032 [Selaginella moellendorffii]	19283	KKVDTVKRMCVKKCPKILAIQLKRFDYDWERECAMKFNDYFEFPREFDLEPYTVEGLAKLEADHNTIPFPGEEIQADERETSDLEEDLEDPNRCTKYRLIGVVVHSGQASGGHYYSYILQRQSVNDVEAKW	29	5.3	1	2	2	1	1	1.081	1.35	1.297	2	2	2	-	-	-	CL12581.Contig1_All	73.68	9e-11	gi|390333473|ref|XP_003723719.1|	PREDICTED: probable ubiquitin carboxyl-terminal hydrolase FAF-X [Strongylocentrotus purpuratus]	62.6	2e-40	sp|Q93008|USP9X_HUMAN	Probable ubiquitin carboxyl-terminal hydrolase FAF-X OS=Homo sapiens GN=USP9X PE=1 SV=3	82.98	1e-16	H9F0E9	H9F0E9_MACMU Putative ubiquitin carboxyl-terminal hydrolase FAF-X isoform 3 (Fragment) OS=Macaca mulatta GN=USP9X PE=2 SV=1	SPBC713.02c	68.6	3e-12	COG5077	Ubiquitin carboxyl-terminal hydrolase	O	Posttranslational modification, protein turnover, chaperones ;	K11840|1|9e-44|174|bfo:BRAFLDRAFT_275724|ubiquitin carboxyl-terminal hydrolase 9/24 [EC:3.1.2.15]	GO:0006511//ubiquitin-dependent protein catabolic process	GO:0008234//cysteine-type peptidase activity;GO:0004221//ubiquitin thiolesterase activity	-
29	CL3171.Contig3_All	236 1453 predicted protein [Physcomitrella patens subsp. patens] >gi|162663144|gb|EDQ49926.1| predicted protein [Physcomitrella patens subsp. patens]	56357	LIGCDDIGDPEDFINETQKEKVKPATQVKAKKQDSQPKKQEPDSKSRKEDVKDSKTDSRRGGRGRGNNADNRPPRKPRDGNRRQEYTESVENQENQAPSELQNDRNDRPPRSSRPPRDRDGDRAPRTFGDRYGERPRDGDTGDRPQRGRGGRGRGGGRGRGGGRDFRGKREFDRHSGNDKSSFKPQDKREGGGTHNWGNFKDDVKEADSTNAVETFTTEEWDAGEAKEVKAVPDKKEEGGEETATKEEEKVEEEGEKEPEVQEMTLDEYKALQATSRRKQDFNLRRPGEGEDNAQWKKTYVLKKTAAQMDEEDREDEHGLREKPKSKDQLDIKFNFYDQPSRGGRGGRRGMGGRGGPGGRGRGRGSGGGGGGGGGGGGGRGGGGGRSRADEAHLSLGDD…	58	4.2	-	1	1	1	1	---	---	---	1	1	1	-	-	-	CL3171.Contig3_All	46.71	2e-16	gi|291242161|ref|XP_002740974.1|	PREDICTED: vasa intronic gene-like [Saccoglossus kowalevskii]	36.46	3e-12	sp|Q8NC51|PAIRB_HUMAN	Plasminogen activator inhibitor 1 RNA-binding protein OS=Homo sapiens GN=SERBP1 PE=1 SV=2	48.28	1e-18	H3I7D1	H3I7D1_STRPU Uncharacterized protein OS=Strongylocentrotus purpuratus GN=SPU_009949gn PE=4 SV=1	-	-	-	-	-	-	-	K13199|1|4e-20|99.8|spu:592065|plasminogen activator inhibitor 1 RNA-binding protein	-	GO:0005488//binding	GO:0044424//intracellular part
30	Unigene8797_All	218 586 minus strand unknown [Picea sitchensis] >gi|294462550|gb|ADE76821.1| unknown [Picea sitchensis]	17032	VNPKAYPLATQELSAKIMDLVKMASTEKQLRKGANEATKTLNRGLAEFIVLAADAEPLEILLHLPLLCEDKNIPYVFVRSKQALGRACGVTRAVIACSVTINEGSQLKPQILRVQQEIEKLLI	186	26.8	-	8	8	2	2	0.889	0.934	1.239	6	6	6	-	-	-	Unigene8797_All	83.56	7e-22	gi|242004735|ref|XP_002423234.1|	ribosomal protein l7ae, putative [Pediculus humanus corporis] >gi|212506213|gb|EEB10496.1| ribosomal protein l7ae, putative [Pediculus humanus corporis]	78.86	2e-44	sp|Q5XH16|NH2L1_XENLA	NHP2-like protein 1 OS=Xenopus laevis GN=nhp2l1 PE=2 SV=1	81.48	5e-38	G1K092	G1K092_RHOPR Nhp2 non-histone chromosome protein 2-like 1 (Fragment) OS=Rhodnius prolixus PE=2 SV=1	SPAC607.03c	182	1e-46	COG1358	Ribosomal protein HS6-type (S12/L30/L7a)	J	Translation, ribosomal structure and biogenesis ;	K12845|1|1e-45|181|cqu:CpipJ_CPIJ005818|U4/U6 small nuclear ribonucleoprotein SNU13	GO:0042254//ribosome biogenesis	GO:0003723//RNA binding;GO:0008270//zinc ion binding	GO:0005730//nucleolus;GO:0005840//ribosome
31	Unigene3721_All	1 450 LEN=1012; translated	19621	XHGILQTDFPIHFAQRSTQDFIIKLFPETMGQNSTTHMANAYKETIFVKVDSERFHVTNFSSSANLGVNGKFQASGSLSMDMVWNKFIEAGFAKIPPGAFAPFSPIANRVYVTVWSPSNGFIWDNLPQIEDISFKVTAASNGEATVVKVK	107	15.3	-	4	4	2	2	1.272	1.497	0.515	4	4	4	-	-	*	Unigene3721_All	-	-	-	-	-	-	-	-	-	-	-	-	-	-	-	-	-	-	-	-	-	-
32	Unigene15088_All	247 1197 minus strand hypothetical protein CHLNCDRAFT_59390 [Chlorella variabilis]	40417	WCTISAPEQKKCESMKTAFADEGLSPAIMCVNRASREECMSAIANDVADLITLDGGDVYSGGQKYDVKPIMEEIYANGKKGYYALAVVRKSNTGVTINNLEGKKTCHTGYGRTAGWNIPVGYLLEENIMPSLACKSSLRSASSYFNESCVPGALDAAPAGVNVSNLCALCESPASCSRSDDGYASYVGALRCLVETDADVAFIKKETVLENTDGNNRDSWASGLKSEDFEILCKDGTRRAITEDADCHLAPSPSHAVVTSSSKSDEDITSYVSLLERAVELFGVDGNSKGFSLFDSATWSEADLLFKDTTETLGALN	662	44.5	-	43	43	11	11	0.955	0.649	1.469	32	34	33	-	*	*	Unigene15088_All	48.58	7e-80	gi|309385780|gb|ADO66732.1|	melanotransferrin [Apostichopus japonicus]	45.45	2e-71	sp|O97490|TRFM_RABIT	Melanotransferrin OS=Oryctolagus cuniculus GN=Mfi2 PE=2 SV=1	48.58	2e-79	E3VVT7	E3VVT7_STIJA Melanotransferrin OS=Stichopus japonicus PE=2 SV=1	-	-	-	-	-	-	-	K06569|1|3e-83|308|spu:581063|melanoma-associated antigen p97	-	-
33	CL1927.Contig1_All	244 3252 minus strand P-ATPase family transporter: sodium/potassium ion [Ostreococcus lucimarinus CCE9901] >gi|144575631|gb|ABO93700.1| P-ATPase family transporter: sodium/potassium ion [Ostreococcus lucimarinus CCE9901]	127521	LKKEMELDEHIISLEELYARLETNFEQGLTKAKAAEILERDGPNALSPPPTTPEWIKFCQQLFGGFATLLWIGSVLCFIAVIVEFSSSENPQKDNLYLGIVLAAVVIITGCFSYYQEAKSSRIMESFKHMVPQEALVLRDGEWMTINAESVVIGDMVEVKGGDRIPADIRVVEARSFKVDNSSLTGESEPQSRSPECTNDNPLETRNIGFFSTNAVEGTARGVVIQCGDNTVMGRIANLASGLSVRDTPIAKEIEHFIHIITSVAVFLGVSFFILSWLLDYTLLESVIFLIGIIVANVPEGLLATVTVCLTLTAKRMARKNCLVKNLEAVETLGSTSTICSDKTGTLTQNRMTVAHMWYDNNIMEADTTEDQSGRNTKEGSGFNEMEVAGGQLDKSSET…	3039	26.7	1	127	127	24	24	0.794	1.009	0.771	112	111	111	*	-	-	CL1927.Contig1_All	81.66	0	gi|184186119|ref|NP_001116982.1|	sodium/potassium ATPase alpha subunit [Strongylocentrotus purpuratus]	75.92	0	sp|P24798|AT1A3_CHICK	Sodium/potassium-transporting ATPase subunit alpha-3 OS=Gallus gallus GN=ATP1A3 PE=2 SV=1	90.38	3e-06	G3H7Y5	G3H7Y5_CRIGR Sodium/potassium-transporting ATPase subunit alpha-2 OS=Cricetulus griseus GN=I79_006481 PE=3 SV=1	MA4378	690	0	COG0474	Cation transport ATPase	P	Inorganic ion transport and metabolism ;	K01539|1|0.0|1592|spu:404637|sodium/potassium-transporting ATPase subunit alpha [EC:3.6.3.9]	GO:0015672//monovalent inorganic cation transport;GO:0007613//memory;GO:0008542//visual learning;GO:0006754//ATP biosynthetic process;GO:0042493//response to drug;GO:0035235//ionotropic glutamate receptor signaling pathway;GO:0008344//adult locomotory behavior	GO:0046872//metal ion binding;GO:0005391//sodium:potassium-exchanging ATPase activity;GO:0005524//ATP binding	GO:0016021//integral to membrane;GO:0005794//Golgi apparatus;GO:0005783//endoplasmic reticulum;GO:0005886//plasma membrane;GO:0005634//nucleus
34	CL262.Contig1_All	1555 3204 unnamed protein product [Blastocystis hominis]	78302	GLGDEEREGLSKVQGGESESQEAVEKINDRPESEKEVDIEKEVDIEKEERGIGKGNQVGAVEEVEPDVSKEAPLADEKKGRKMLGRRGRKKKNQVTEVIDLCDTQSQETGGNAEGNLTSDQGVEDNGNEGQRSEDLADGEMKEQPVTDKAEMKKQDSGNSGKKISKQGTKQGLGNKKKRGHKPKQEAGRLEKEMNVEDGETNTSKSVKEVVDEKEVESLPKNNNDSVIRKVEMVAEERSSDSEDDIPLTHLRKNAVDDDTEQEIISKEASIDSESKSRSQESLATVQTQVSTSRSVDRNSQKESNSRRRRRLNRSVSPKIRRNLCEKFLKAKQVSPKSTSFHGFVTRRRSPKRSPKLLRSKGLLGPIHTRLRSKAGHLKRISPKQRKSIRRKNSSQNKS…	14	2	-	1	1	1	1	---	---	---	-	-	-	-	-	-	CL262.Contig1_All	-	-	-	-	-	-	-	-	-	-	-	-	-	-	-	-	-	-	-	-	-	-
35	Unigene5209_All	40 909 conserved hypothetical protein [Phytophthora infestans T30-4] >gi|262101372|gb|EEY59424.1| conserved hypothetical protein [Phytophthora infestans T30-4]	37075	EKDDVHLIMEYKTGEVWGKYKTPRANRFIVHSDSSNPMLESLDEFREELGAFKPQAVVIGGLQMMDNFPFREEERQSRLLELQKLMVGLSPDIKTHFEFASFAEEQMLRDLLQYIIPYSNSIGMNEQELPNLYSLLNYGNVSLLADPYPRTATILDQMRFVFNSLRNDPNAEGEKRLSRLHVHTLAFQAIMTAKDSGWKNTMSATAKAALTANRYVCGTSKVDVTKSRIIMDESFSISEEAGSERMPFRNDRPVSCWDEGEVAICVAPVLVCTDINMTAGGGDNVSSAGL	36	3.4	-	1	1	1	1	---	---	---	1	1	1	-	-	-	Unigene5209_All	64.83	4e-111	gi|115631735|ref|XP_798720.2|	PREDICTED: ADP-dependent glucokinase-like [Strongylocentrotus purpuratus]	32.53	1e-31	sp|Q8VDL4|ADPGK_MOUSE	ADP-dependent glucokinase OS=Mus musculus GN=Adpgk PE=1 SV=2	64.83	7e-111	H3JJE1	H3JJE1_STRPU Uncharacterized protein OS=Strongylocentrotus purpuratus GN=SPU_026714gn PE=4 SV=1	PAB0967	71.6	1e-12	COG4809	Archaeal ADP-dependent phosphofructokinase/glucokinase	G	Carbohydrate transport and metabolism ;	K08074|1|8e-81|300|nve:NEMVE_v1g230488|ADP-dependent glucokinase [EC:2.7.1.147]	-	-
36	CL8386.Contig1_All	72 1604 PREDICTED: methylmalonate-semialdehyde dehydrogenase [acylating], mitochondrial-like [Solanum lycopersicum] >CL8386.Contig2_All 48 1580 minus strand PREDICTED: methylmalonate-semialdehyde dehydrogenase [acylating], mitochondrial-like	64996	RMNSLLRLTSSICKVQTSLLSARALCHHHAPTTKNFINGEFLESKTSEWIDVNNPATNEIVTRVPKSTPDEMQAAVDAASAAYETWSRETVMARQQIMFKYQALIKENLKEIAKNITLEQGKTLIDAEGDVIRGLQVVEHLCSITSLQLGETLPGIAKDMETYTMRVPIGVCAGITPFNFPAMIPLWMFPVAAVCGNTYILKPSERDPGASMMLVELAQQAGIPPGVINVIHGQHDAVNFICENPAIRAVSFVGSDIAGSYIHEKASKNGKRVQCNMGAKNHGVVMPDANKENTLNQLVGAAFGAAGQRCMALSTAIFVGDAKEWIPDLVERSKNLKVNAGDQPGTDVGPLISPEAKKRVLSLVQSGVDEGASLVLDGRDVVVQGYEKGNFVGPTILSD…	706	15.1	-	25	25	6	6	1.518	0.842	1.024	23	23	23	*	-	-	CL8386.Contig1_All	81.28	5e-114	gi|260818733|ref|XP_002604537.1|	hypothetical protein BRAFLDRAFT_79383 [Branchiostoma floridae] >gi|229289864|gb|EEN60548.1| hypothetical protein BRAFLDRAFT_79383 [Branchiostoma floridae]	70.89	0	sp|Q02252|MMSA_HUMAN	Methylmalonate-semialdehyde dehydrogenase [acylating], mitochondrial OS=Homo sapiens GN=ALDH6A1 PE=1 SV=2	77.76	0	H3JIS7	H3JIS7_STRPU Uncharacterized protein OS=Strongylocentrotus purpuratus GN=SPU_026493gn PE=3 SV=1	PA0747	522	6e-148	COG1012	NAD-dependent aldehyde dehydrogenases	C	Energy production and conversion ;	K00140|1|0.0|830|spu:578337|malonate-semialdehyde dehydrogenase (acetylating) / methylmalonate-semialdehyde dehydrogenase [EC:1.2.1.18 1.2.1.27]	GO:0055114//oxidation-reduction process	GO:0004491//methylmalonate-semialdehyde dehydrogenase (acylating) activity	-
37	Unigene9159_All	1 423 hypothetical protein SELMODRAFT_447032 [Selaginella moellendorffii] >gi|300144693|gb|EFJ11375.1| hypothetical protein SELMODRAFT_447032 [Selaginella moellendorffii]	20143	DGKYTHTEHVDTHLQFLAFILEQGQLYLPWHQAKEIWDCLIGNPEACNSDKETCYQWFTRGLNDLEGDTQQQLFREKILKTNPANLSVIGFDCIKAFFESINIKNLKLKKSGTLLIVEKLDLMGLEFLWQIALESPSEEIA	34	10.6	-	1	1	1	1	---	---	---	1	1	1	-	-	-	Unigene9159_All	62.41	2e-51	gi|390341500|ref|XP_796637.3|	PREDICTED: LOW QUALITY PROTEIN: ubiquitin carboxyl-terminal hydrolase 24-like [Strongylocentrotus purpuratus]	51.77	2e-42	sp|Q9UPU5|UBP24_HUMAN	Ubiquitin carboxyl-terminal hydrolase 24 OS=Homo sapiens GN=USP24 PE=1 SV=3	55.68	2e-24	H2L8C6	H2L8C6_ORYLA Ubiquitin carboxyl-terminal hydrolase OS=Oryzias latipes GN=USP24 PE=3 SV=1	-	-	-	-	-	-	-	K11840|1|2e-51|200|spu:592001|ubiquitin carboxyl-terminal hydrolase 9/24 [EC:3.1.2.15]	GO:0006508//proteolysis	GO:0008233//peptidase activity	-
38	Unigene47273_All	110 295 predicted protein [Physcomitrella patens subsp. patens] >gi|162669267|gb|EDQ55858.1| predicted protein [Physcomitrella patens subsp. patens]	7921	RAKLPPGLTPWPLLGNLPSLIGTEPHLFITKVGNQFGGISTFFKGTSPVVVFNRLDQAVEAY	38	21	-	1	1	1	1	---	---	---	1	1	1	-	-	-	Unigene47273_All	-	-	-	-	-	-	-	-	-	-	-	-	-	-	-	-	-	-	-	-	-	-
39	Unigene51576_All	33 224 minus strand hypothetical protein OsI_11235 [Oryza sativa Indica Group]	10112	QNVLAELDIEKRLALVLEIAKRDLEFARLQTQVKTQVEEKLTKEQRRVMLLEQLKFIKRELGYE	22	14.1	-	2	2	1	1	1.687	---	---	2	1	1	-	-	-	Unigene51576_All	74.19	2e-16	gi|221481063|gb|EEE19471.1|	lon protease, putative [Toxoplasma gondii GT1]	51.56	2e-10	sp|A2YQ56|LONM_ORYSI	Lon protease homolog, mitochondrial OS=Oryza sativa subsp. indica GN=OsI_27415 PE=2 SV=1	74.19	1e-15	B9Q2F7	B9Q2F7_TOXGO Lon protease homolog OS=Toxoplasma gondii GN=TGGT1_055620 PE=3 SV=1	YBL022c	52.8	1e-07	COG0466	ATP-dependent Lon protease, bacterial type	O	Posttranslational modification, protein turnover, chaperones ;	K08675|1|2e-11|67.8|smm:Smp_126490|Lon-like ATP-dependent protease [EC:3.4.21.-]	GO:0006508//proteolysis	GO:0004252//serine-type endopeptidase activity;GO:0005524//ATP binding;GO:0004176//ATP-dependent peptidase activity	-
40	CL387.Contig1_All	132 830 LEN=2069; minus strand; translated	35648	VVLALEWPPDAEICQDVVCKKPKGSWCTPGEKNGKLKAVCECPENCPDVYQPVCSVYGRQYENLCKLHEYTCKKGKNIPMAYNGICIASQKKCKDDEFQQFPVRLLDWFLHLHEIDQFGRLDPNTNIKQKTPQERSMYATWKFNQLDDDGDGKLDKKDLLNFRYSLMPLEHCASDFFKTCANKKAKKITLEGWLQCLKVYDTLEYPQPEEGVTEEVDEDLDDDIDDFFGDDDD	53	4.7	-	1	1	1	1	---	---	---	1	1	1	-	-	-	CL387.Contig1_All	53.89	2e-48	gi|72012177|ref|XP_786595.1|	PREDICTED: SPARC-like protein 1-like [Strongylocentrotus purpuratus]	39.44	3e-07	sp|Q6MZW2|FSTL4_HUMAN	Follistatin-related protein 4 OS=Homo sapiens GN=FSTL4 PE=2 SV=3	53.89	5e-48	H3IEN2	H3IEN2_STRPU Uncharacterized protein OS=Strongylocentrotus purpuratus GN=SPU_012548gn PE=4 SV=1	-	-	-	-	-	-	-	K08136|1|3e-08|58.5|acs:100567738|sparc/osteonectin, cwcv and kazal-like domains proteoglycan (testican)	-	-
41	CL3968.Contig2_All	176 2196 LEN=2196; minus strand; translated	95638	TVLPCDEKVYAELGERASIDCYLSVIGNVFWYSGKTAFDIPIVKLENGRKTISDGDRSRYDISETGALIINEVTKNDFDQYKIIHVLIGRPIEEAVVTLQRPIAPKRSCPQIGECFDCRKCVIKNTDTITCSVSGSRPLVNFTFDAIKKTHGTHTTTKIQYDNSSDTWTTSSTINIHSQSCNMSLNLGCNVEGNYPFVLSDSYANVQFDTCSRTQRKEPREEPSSDPANHTAITIVIPIILVLFFVLLVVACFIVKRRCQRNTHDRLPTDIPLMENSQIEDKKGLLINHLENIYKGMRYITPLPWGKPIDIEQLYIPTTFEFNKKQGKETKASNVFLKSSDFDSTKRALFTAELGNGKTTLQKYLAWQWSLKTDMQKQQKLLFFLEVKDINMGLAEALS…	44	1.3	1	2	2	1	1	0.737	1.244	1.035	2	2	2	-	-	-	CL3968.Contig2_All	31.45	8e-07	gi|443714029|gb|ELU06598.1|	hypothetical protein CAPTEDRAFT_213051 [Capitella teleta]	-	-	-	-	-	-	-	-	-	-	-	-	-	-	-	-	-	-
42	Unigene28963_All	8 1978 minus strand predicted protein [Populus trichocarpa] >gi|222847561|gb|EEE85108.1| predicted protein [Populus trichocarpa]	99659	EFFIKIIPNPEEKTITIQDSGIGMTKAHLINNLGTIAKSGTKAFMEALQAGADISMIGQFGVGFYSAYLVAEKVSVISKHNDDECYRWESAAGGSFTVQPIPTPEDFGRGTQIVLTLKEDMVEYTEEKRIKDIVKKHSQFIGYPIKLQLEKEREKEVSDDEEEEKEEEKEEKEEKEGEEKKDEDTPEIEDVEDDEDGKKKEKKTKKIKEKYIDEEELNKTKPIWTRNADDITSEEYGEFYKSLTNDWEEHLAVKHFSVEGQLEFRALLFVPKRAPFDLFENKKKKNNIKLYVRRVFIMDNCEDLIPEYLNFVKGVVDSEDLPLNISRETLQQSKILKVIRKNIVKKCMELIVELSEDNDNYKKFYEQFSKNLKLGIHEDSQNRSKLASFLRYHSSSSGD…	2046	37.6	-	112	4	23	2	1.548	9.952	6.805	2	2	2	-	*	*	Unigene28963_All	100	0	gi|336455798|gb|AEI59388.1|	heat shock protein 90 [Apostichopus japonicus]	85.47	0	sp|O57521|HS90B_DANRE	Heat shock protein HSP 90-beta OS=Danio rerio GN=hsp90ab1 PE=1 SV=2	100	0	G4XU66	G4XU66_STIJA Heat shock protein 90 OS=Stichopus japonicus GN=hsp90 PE=2 SV=1	SPAC926.04c	744	0	COG0326	Molecular chaperone, HSP90 family	O	Posttranslational modification, protein turnover, chaperones ;	K04079|1|0.0|709|ssc:397028|molecular chaperone HtpG	GO:0051131//chaperone-mediated protein complex assembly;GO:0042026//protein refolding;GO:0003009//skeletal muscle contraction;GO:0007411//axon guidance;GO:0045429//positive regulation of nitric oxide biosynthetic process;GO:0009651//response to salt stress;GO:0006200//ATP catabolic process;GO:0006986//response to unfolded protein;GO:0045040//protein import into mitochondrial outer membrane;GO:000…	GO:0005525//GTP binding;GO:0002135//CTP binding;GO:0042803//protein homodimerization activity;GO:0002134//UTP binding;GO:0051082//unfolded protein binding;GO:0017098//sulfonylurea receptor binding;GO:0032564//dATP binding;GO:0003729//mRNA binding;GO:0044325//ion channel binding;GO:0005524//ATP binding;GO:0016887//ATPase activity;GO:0030911//TPR domain binding;GO:0019901//protein kinase binding;GO…	GO:0009986//cell surface;GO:0031526//brush border membrane;GO:0043005//neuron projection;GO:0016324//apical plasma membrane;GO:0043234//protein complex;GO:0005829//cytosol;GO:0016323//basolateral plasma membrane;GO:0048471//perinuclear region of cytoplasm;GO:0042470//melanosome;GO:0043025//neuronal cell body;GO:0031012//extracellular matrix
43	Unigene15166_All	109 834 hypothetical protein SORBIDRAFT_09g003820 [Sorghum bicolor] >gi|241945883|gb|EES19028.1| hypothetical protein SORBIDRAFT_09g003820 [Sorghum bicolor]	36667	KEKQDINFDAEWVDMKPTVLKLLRQENVSRAEWQDLFWKVYNVCMWDEKCLPKVLGALQQEIKSFVLQVKEKVVHDQDENALLRAYIREWSKYFTQSTYLPMPFNALEKMLVSSKDSTNNQQKKTSKVEEDSEVRKNMLDFWNLYIFDTIKQPLKDRAMALLYKERNSETFDKQLISGVRESFVNLCSNSEDRLQIYRESFEAAYLETTESFYKTQAPEYLAENGVQNYMRYADEKLKEEEE	60	7	-	4	4	2	2	0.601	1.221	1.143	3	3	3	-	-	-	Unigene15166_All	67.03	8e-30	gi|322798755|gb|EFZ20337.1|	hypothetical protein SINV_06390 [Solenopsis invicta]	55.37	7e-69	sp|Q9JJ31|CUL5_RAT	Cullin-5 OS=Rattus norvegicus GN=Cul5 PE=1 SV=3	67.26	5e-37	E9Q6Z0	E9Q6Z0_MOUSE Cullin-5 OS=Mus musculus GN=Cul5 PE=3 SV=1	SPAC17G6.12	62.8	6e-10	COG5647	Cullin, a subunit of E3 ubiquitin ligase	O	Posttranslational modification, protein turnover, chaperones ;	K10612|1|2e-84|311|spu:582593|cullin 5	-	-
44	Unigene423_All	3 803 Cysteine synthase [Ectocarpus siliculosus]	32838	KAGGTVVEGTAGNTGIGISHICNAMGFKCVIFMPDNQSQEKVNALTTLGATVYQVPVVPFDNPDNYNHQARRYAEERENTVWTNQFDNTANRQAHIEMTGPEIWRETDGKIDAVVFGTGTGGTLAGVGMYLKEKNPNVQVFLADPQGSVLYNYFKHGKFERTEGSSVTEGIGQGRLTDNLKGAPIDDALAIKDVDAVNMTFRLLEEEGFFVGASTGLNVTAAVQVARIMGPGHTIATCLCDNGQRYYNRLFSRSWLETKGLLGALSE	118	9	-	4	4	2	2	0.631	1.117	0.951	3	3	3	-	-	-	Unigene423_All	78.38	1e-10	gi|260836323|ref|XP_002613155.1|	hypothetical protein BRAFLDRAFT_120249 [Branchiostoma floridae] >gi|229298540|gb|EEN69164.1| hypothetical protein BRAFLDRAFT_120249 [Branchiostoma floridae]	58.74	8e-82	sp|P50867|CYSK_EMENI	Cysteine synthase OS=Emericella nidulans (strain FGSC A4 / ATCC 38163 / CBS 112.46 / NRRL 194 / M139) GN=cysB PE=3 SV=2	75.28	9e-104	H3JIQ4	H3JIQ4_STRPU Uncharacterized protein OS=Strongylocentrotus purpuratus GN=SPU_026470gn PE=4 SV=1	RSp0276	336	3e-92	COG0031	Cysteine synthase	E	Amino acid transport and metabolism ;	K01738|1|6e-107|387|cin:100179446|cysteine synthase A [EC:2.5.1.47]	GO:0019344//cysteine biosynthetic process	GO:0003824//catalytic activity	-
45	CL4450.Contig4_All	214 1614 predicted protein [Physcomitrella patens subsp. patens] >gi|162683915|gb|EDQ70321.1| predicted protein [Physcomitrella patens subsp. patens]	62818	LTISVELHAENRKRLCSKLKKIKEVPEGAIIFLKGGEEELRNDTDVGPVFRQESYFHWAFGVEESGFFGAIAVDSGNAVLFCPELPKEYAVWLGKILPREHFQQRYAVDDVCFINKIADWFAGQKPSVILTLKGKNTDSGNYAEEATFTGIDKFTVNNSLLFPEIVECRVFKTAKELEILRYVCRISSEAHIEVMRKIKPGMKEFQIESMFQHYCYYNGGCRHTSYTCICASGANAAILHYGHAGEPNSRTMEAGDICNFDMGGEYYCYASDITCAYPVNGKFTDQQKKIYNTVLKANQAVFNAVKPGVLWTDMHLLAEKVILEELTSHGLLKGDISEMQKVNVGALFFPHGLGHLMGIDVHDVGGYPEGGNERSTLPGLKYLRTARVLEADMVLTIEP…	756	20.1	-	43	43	10	10	0.817	1.282	1.077	30	30	30	-	*	-	CL4450.Contig4_All	65.85	7e-68	gi|405945534|gb|EKC17375.1|	Xaa-Pro dipeptidase [Crassostrea gigas]	60.39	9e-171	sp|Q5I0D7|PEPD_RAT	Xaa-Pro dipeptidase OS=Rattus norvegicus GN=Pepd PE=2 SV=1	64.34	3e-96	F1NIR0	F1NIR0_CHICK Uncharacterized protein (Fragment) OS=Gallus gallus GN=PEPD PE=3 SV=1	YFR006w	235	1e-61	COG0006	Xaa-Pro aminopeptidase	E	Amino acid transport and metabolism ;	K14213|1|2e-175|615|gga:415776|Xaa-Pro dipeptidase [EC:3.4.13.9]	GO:0006520//cellular amino acid metabolic process;GO:0043170//macromolecule metabolic process	GO:0046872//metal ion binding;GO:0004181//metallocarboxypeptidase activity	-
46	Unigene14909_All	209 859 minus strand oxidoreductase htatip2 [Nannochloropsis gaditana CCMP526]	31183	SAFIVGYTGEVGKELVRQLAKTNTFGKVLLIGRRKVEYKDEDIANNPAIEQVLVNFDELEKSKDSFEGVDVGFCCLGTTKGRAGKEGQWKVDHDYAVKSAELAKEGGCKQFHLVSSMGANSKSMVFYNKLKGQTEDDVKAVGIARTSIYRPGGLMCDREDFRLVEWIGRKTLTPMDYFFPGVITNATSIVAKAMINNVTKTTDSPSETFEPKGIHKL	30	5.5	-	1	1	1	1	---	---	---	1	1	1	-	-	-	Unigene14909_All	51.83	7e-59	gi|291245044|ref|XP_002742403.1|	PREDICTED: TIP30-like [Saccoglossus kowalevskii]	43.32	7e-47	sp|A1YER2|HTAI2_GORGO	Oxidoreductase HTATIP2 OS=Gorilla gorilla gorilla GN=HTATIP2 PE=3 SV=1	49.31	5e-54	A1YS47	A1YS47_BRABE TIP30 OS=Branchiostoma belcheri tsingtauense GN=TIP30 PE=2 SV=1	PA4017	97.1	2e-20	COG0702	Predicted nucleoside-diphosphate-sugar epimerases	MG	Cell wall/membrane/envelope biogenesis ; Carbohydrate transport and metabolism ;	-	-	-
47	CL12816.Contig3_All	1 979 LEN=1378; minus strand; translated	48905	EKTKWLNTPNTYSKVEVAQEYANWGEEGEDEGYKTKIHLSSSDXVIGGRHIIRLTESPDTILNFGQFGDFDIQDIEEALAKWVGDKDPKSGDAVAITDPQQFARQGQDPKEYKKKAKTVRQERFGDKTHPGPISEVLAGITYGDARRTQPIDPNAQVYAKSKGIIQREYQDEAVLYTAYAPNPFTSMSEREILDYKKEIADKTGQDVKIPLQDVKEIELIVQAEETEIKETKEESEDGEKVKTQKITTKTVTIHGDEPGTVETTTVSIVNGEKEDDDDRAPSPTPEGSQSVEGSPSKDSSLSPTKKKKKFRTPSFLSKKKKDKKAE	115	9.8	-	4	4	2	2	1.265	1.343	0.808	4	3	3	-	*	-	CL12816.Contig3_All	42.64	7e-19	gi|443692354|gb|ELT93964.1|	hypothetical protein CAPTEDRAFT_100987 [Capitella teleta]	31.73	2e-08	sp|Q5RA10|ADDA_PONAB	Alpha-adducin OS=Pongo abelii GN=ADD1 PE=2 SV=1	43.39	1e-19	H3HXC5	H3HXC5_STRPU Uncharacterized protein OS=Strongylocentrotus purpuratus GN=SPU_006366gn PE=4 SV=1	-	-	-	-	-	-	-	-	GO:0007010//cytoskeleton organization;GO:0003006//developmental process involved in reproduction;GO:0048468//cell development;GO:0048477//oogenesis;GO:0048646//anatomical structure formation involved in morphogenesis;GO:0048610//cellular process involved in reproduction	-	GO:0005737//cytoplasm
48	Unigene19462_All	1 635 LEN=635; translated	26587	XFPAGDQPDDDVDSSDPEEFVQALERQSILFDRIRKGYPTEASLVAEVLPTFLEDFFSPQDVMNKVIGEFLSNQQPHPQLMATIVYRVFAGLHRQGQSELVQDWVLLSLSNFTQRTPVAMAIWSLSVFFMCASTNKWVQNLLPLVLSRMGKLDTLDRELFVLFAKDFYHSQITESSARRAFVSTFQTVCASEIAYSALLNQLXSCEEHRYIKX	38	3.8	-	2	2	1	1	---	---	---	1	1	1	-	-	-	Unigene19462_All	75.93	2e-44	gi|168479232|emb|CAL41417.1|	huntingtin [Strongylocentrotus purpuratus]	64.29	3e-64	sp|P42859|HD_MOUSE	Huntingtin OS=Mus musculus GN=Htt PE=1 SV=2	75.93	5e-44	B0R202	B0R202_STRPU Huntingtin (Fragment) OS=Strongylocentrotus purpuratus GN=hd PE=2 SV=1	-	-	-	-	-	-	-	K04533|1|6e-65|246|cfa:479074|huntingtin	-	-	GO:0005634//nucleus;GO:0005737//cytoplasm
49	Unigene19511_All	1 1005 LEN=1005; minus strand; translated	42663	XSYQRELILRYKGHEYVIRRHRVSVDGVKVTPPLLNHAGVTVHYDVPFTTVETEFGLKFRYNQRTDTEVYLSNEFASKVCGLCGNFDGNKKNDFTKPNGQRNGRARVFAQSWLVSGDPECENDEDDYIPTDDDLDFESDPCQFADSSQISEAEHLCQILSPDDDRLRSCHQVADSSFYYETCKYDLCATLPDQTVLCDSIEEFLIACREAGGEPGDWRSSVPQCPFHCPVGFEYSHCGSSCPNTCTERNRTATCEDNCQETCLCPEGQVLDGHHCVFENECGCLLESGRYISRGETWTSNNCTELCTCEGGHLECDYVYCDENAQCVIENGERKCR	31	3.6	-	1	1	1	1	---	---	---	1	1	1	-	-	-	Unigene19511_All	45.88	2e-35	gi|115822623|ref|XP_780608.2|	PREDICTED: IgGFc-binding protein-like, partial [Strongylocentrotus purpuratus]	43.66	3e-08	sp|O88799|ZAN_MOUSE	Zonadhesin OS=Mus musculus GN=Zan PE=2 SV=1	47.69	3e-27	H3JDW9	H3JDW9_STRPU Uncharacterized protein OS=Strongylocentrotus purpuratus GN=SPU_024758gn PE=4 SV=1	-	-	-	-	-	-	-	K13908|1|2e-30|133|ecb:100147340|mucin-5B!K03900|4|2e-29|130|dre:570643|von Willebrand factor	-	-
50	Unigene25829_All	28 1791 minus strand PREDICTED: putative phagocytic receptor 1b-like [Brachypodium distachyon]	75492	MATSTTILFVALLYIIQCFAADNHFKDGDQVHIYVNKVGPYYNPHETYHYYQLPVCRPETVETKSLTLGEILDGDRMAESMYDIKFKESTKEDKHLCTFKLTPEELSHLKEAIEDLYYFEFVVDDIPLRGFVGLFQEKSFFPHEHQVRLWTHHHFYLEYHGDQIIYANISVHNREGLLLSDSDSGLQVQFTYNVTWKETDVDYAHRAMRLIKDPLFFPHTLEVHWLSVINSMVLVFLLIGFVLIILMRVLKNDFARYNPYEEDTEDLDAEENGWKIINTDVFRVPQHKSLLSAILGVGSQFLALATAILLMAMTGMFNVHRHGSMNSAAVLIYALTSCIAGYVSSNFYKQLGGEKWVWNIVLTSCMFSVPFFVVWSFVNSVAWYQGSTQALPFTTILLL…	103	3.4	-	6	6	2	2	1.104	1.076	0.936	5	5	5	-	-	-	Unigene25829_All	83.67	6e-15	gi|260804433|ref|XP_002597092.1|	hypothetical protein BRAFLDRAFT_105034 [Branchiostoma floridae] >gi|229282355|gb|EEN53104.1| hypothetical protein BRAFLDRAFT_105034 [Branchiostoma floridae]	65.51	0	sp|Q9DBU0|TM9S1_MOUSE	Transmembrane 9 superfamily member 1 OS=Mus musculus GN=Tm9sf1 PE=2 SV=2	83.67	2e-14	C3Z253	C3Z253_BRAFL Putative uncharacterized protein OS=Branchiostoma floridae GN=BRAFLDRAFT_105034 PE=4 SV=1	-	-	-	-	-	-	-	-	-	-	GO:0016020//membrane;GO:0044444//cytoplasmic part;GO:0043229//intracellular organelle
51	Unigene26102_All	191 1306 Sarcosine oxidase [Medicago truncatula] >gi|355492598|gb|AES73801.1| Sarcosine oxidase [Medicago truncatula]	52460	QYDCIVIGAGIEGSATAYHLSKKKKKTLLLEQFGLPHSRGSSHGQSRITRFSYSQEHYMKMMEEAFPLWSQLEKETETTLFKNTKLLVIQKPPYDLLDNRKRELLKCGKPFKELTHEELRQNYPGMKLSKDFRAVLDHSAGTLRADKALRGFQVQFEKQGGILKDEEKVLNIIPGRYVVVYTNKAVHRANSVVITPGAWASKLLKPLGLNIPLQVWRINVCYWREKFGDFDKMPCVIDDSTGEKHVYLLPMHEYPGLVKIAYHSGIDCDPDRRDEHATTDDREVKIIQRFINNYLPGIDGNKPVITESCMYTVTPDWELVLDHHPSHPNIVIGCGFSGHGFKLAPVVGKILSELATGQEPSYDISALRISRF	138	12.1	-	8	8	4	4	1.6	0.868	0.788	7	7	7	-	-	-	Unigene26102_All	66.28	6e-20	gi|449480205|ref|XP_004177082.1|	PREDICTED: LOW QUALITY PROTEIN: peroxisomal sarcosine oxidase-like [Taeniopygia guttata]	48.68	5e-91	sp|Q29RU9|SOX_BOVIN	Peroxisomal sarcosine oxidase OS=Bos taurus GN=PIPOX PE=2 SV=2	56.52	7e-16	G3I7W6	G3I7W6_CRIGR Peroxisomal sarcosine oxidase OS=Cricetulus griseus GN=I79_019615 PE=4 SV=1	STM1160	148	1e-35	COG0665	Glycine/D-amino acid oxidases (deaminating)	E	Amino acid transport and metabolism ;	K00306|1|2e-102|373|xla:735186|sarcosine oxidase / L-pipecolate oxidase [EC:1.5.3.1 1.5.3.7]	-	-
52	CL709.Contig5_All	409 1233 LEN=1736; minus strand; translated	35225	PVPRFTVQDGYQALCMDVLDTGRLAVAGYSSKKKNSFIDLFMFHLNPYSQKQLTPEPYFSQEFTEFGSEWRSVCLLDDRLFLTCCKNTIALYDSTNGGLVNQGKLNGEARCMTTRGGRVYVGLDSSELIVLDARELRIMHTITLEKLEVGDYPFDITVSKEKLFICTVDRRALMYNSEGEVEQEYKNTQYRHARSITVSEEKGLIFILWSGSGSEGCQVVVYSLSGGHSSISGGHSSSSGGHIRDSFEVPDDSWRIRINNNINRLFLVTEITGKV	105	3.6	-	4	4	1	1	0.106	0.357	0.652	4	4	4	*	*	-	CL709.Contig5_All	-	-	-	-	-	-	-	-	-	-	-	-	-	-	-	-	-	-	-	-	-	-
53	Unigene26999_All	109 300 putative O-sialoglyco protein endopeptidase [Coccomyxa subellipsoidea C-169]	8580	MPTVIGFEGSANKLGIGIVRDGEVLANPRHTYITPPGQGFLPRDTAKHHQEHAIEVLKQCMKEA	37	21.9	-	1	1	1	1	---	---	---	1	1	1	-	-	-	Unigene26999_All	82.81	2e-26	gi|187470902|sp|A7SXZ6.1|OSGEP_NEMVE	RecName: Full=Probable tRNA threonylcarbamoyladenosine biosynthesis protein osgep; AltName: Full=t(6)A37 threonylcarbamoyladenosine biosynthesis protein osgep	82.81	2e-27	sp|A7SXZ6|OSGEP_NEMVE	Probable tRNA threonylcarbamoyladenosine biosynthesis protein osgep OS=Nematostella vectensis GN=osgep PE=3 SV=1	94.74	4e-13	H3JQP3	H3JQP3_STRPU Uncharacterized protein OS=Strongylocentrotus purpuratus GN=SPU_030036gn PE=4 SV=1	SPBC16D10.03	82	2e-16	COG0533	Metal-dependent proteases with possible chaperone activity	O	Posttranslational modification, protein turnover, chaperones ;	K15900|1|2e-27|120|nve:NEMVE_v1g194666|tRNA threonylcarbamoyladenosine biosynthesis protein	GO:0006508//proteolysis	GO:0004222//metalloendopeptidase activity	-
54	CL4412.Contig1_All	161 544 Rossmann-fold NAD(P)-binding domain-containing protein [Arabidopsis thaliana] >gi|9279666|dbj|BAB01223.1| alcohol dehydrogenase-like protein [Arabidopsis thaliana] >gi|23505869|gb|AAN28794.1| At3g26770/MDJ14_21 [Arabidopsis thaliana] >gi|	17848	KVEGTVALVTGAAQGIGRSLTERLLELGAKWVSIIDIDKKLGGTLAEELAEKYGKDRVGFMWCDIAYGDKLADVFEETYKKHNRLDIVVNNAAIQDETQWEATVQVNYLAVVRGIRLAKKYMSTENGG	148	35.2	-	7	7	4	4	1.41	0.701	1.712	7	7	7	-	*	*	CL4412.Contig1_All	50	5e-08	gi|328717841|ref|XP_003246317.1|	PREDICTED: 15-hydroxyprostaglandin dehydrogenase [NAD+]-like [Acyrthosiphon pisum]	44.88	3e-23	sp|Q8MJY8|PGDH_MACFA	15-hydroxyprostaglandin dehydrogenase [NAD(+)] OS=Macaca fascicularis GN=HPGD PE=2 SV=1	46.46	8e-23	H9K3G7	H9K3G7_APIME Uncharacterized protein OS=Apis mellifera GN=LOC409847 PE=4 SV=1	Rv0242c	59.3	2e-09	COG1028	Dehydrogenases with different specificities (related to short-chain alcohol dehydrogenases)	IQR	Lipid transport and metabolism ; Secondary metabolites biosynthesis, transport and catabolism ; General function prediction only ;	K00069|1|7e-28|122|spu:591898|15-hydroxyprostaglandin dehydrogenase (NAD) [EC:1.1.1.141]	GO:0044699//single-organism process;GO:0050794//regulation of cellular process;GO:0008152//metabolic process;GO:0022414//reproductive process	GO:0000166//nucleotide binding;GO:0003824//catalytic activity	-
55	CL2923.Contig2_All	1 700 LEN=700; translated	33415	LCGYWNCYRPRDASPHCLLFVSKRRYEYTDRNSGSIHVEMQKPPKQKKKSLEERKNTLVEGLMKYYEKFCFIKPLPWGEPIPIHALYTTCQCTVTNVNGDVSHHASDFLSTPEFNFDSNRVFIIADLGYGKTTYTQHLVSDWVSKMKPTKKSRKDEISEPILIYIYLREVAPSMTLSELVKKMMPAGIDLTEDDIVELFLNFEFQVLLDGLDELSMSTISTNTSPENPTNDKEX	48	14.5	-	5	5	3	3	1.117	1.058	1.618	3	3	3	-	-	-	CL2923.Contig2_All	-	-	-	-	-	-	-	-	25.44	6e-06	H3J7Q5	H3J7Q5_STRPU Uncharacterized protein OS=Strongylocentrotus purpuratus GN=SPU_022564gn PE=4 SV=1	-	-	-	-	-	-	-	-	-	-
56	CL11068.Contig2_All	137 6487 predicted protein [Populus trichocarpa] >gi|222852039|gb|EEE89586.1| predicted protein [Populus trichocarpa]	295213	KLEGLFNSKEDALTSLKTQLEKLKVNSEQRFQQLETEWVKTNTQLEKESSEAVELRTSKTKLEEQLKKSEDELTNLKERTEGSFGTHQELTRANEQLTAEKQEMVTIIDRKTKQIQRLNDEWKSMSEKLAAADMAKSEIQMKLDEVQHEDFSGKFREKRFEQEKEMLSSQIDWLEKSLKEKIEEVLSLRKEKSNQIVELQSDLSSREDDIKQLQDQVKRMEKTLEEQTKKMEETRDKLQENLDVISRNEEQFNGELQAQKKLTDIYKQTSDEHEGRVRELISAVEELQKLLKLATDAQEELEVNNKKMEATYTTEKEELVKKIDKMEQELDNANDLLAAARKKGLTPLSEEELTSLSPTAAAASSFIKSGMTLTQMYSEYIKASESLQSEKLENQRLNE…	162	2.6	-	11	11	5	5	1.41	1.085	1.679	10	10	10	-	-	*	CL11068.Contig2_All	60.64	3e-65	gi|115735734|ref|XP_784812.2|	PREDICTED: nucleoprotein TPR-like [Strongylocentrotus purpuratus]	37.84	0	sp|P12270|TPR_HUMAN	Nucleoprotein TPR OS=Homo sapiens GN=TPR PE=1 SV=3	60.76	4e-65	H3IWK0	H3IWK0_STRPU Uncharacterized protein OS=Strongylocentrotus purpuratus GN=SPU_018590gn PE=4 SV=1	-	-	-	-	-	-	-	K09291|1|0.0|745|mgp:100549783|nucleoprotein TPR	GO:0008645//hexose transport;GO:0050794//regulation of cellular process;GO:0008152//metabolic process	GO:0005488//binding	GO:0016020//membrane;GO:0000776//kinetochore;GO:0005635//nuclear envelope
57	Unigene58107_All	92 340 hypothetical protein OsI_20595 [Oryza sativa Indica Group]	11491	VKTMRDNLLCPICLDLLENAKTLPCQHVVCKTCLEQWVAMKGELRCPTCNTRQQEPVGGVNGLPSNFMLNTLAAEIRKLDTQD	14	12	-	1	1	1	1	---	---	---	-	-	-	-	-	-	Unigene58107_All	50	1e-12	gi|260809305|ref|XP_002599446.1|	hypothetical protein BRAFLDRAFT_223862 [Branchiostoma floridae] >gi|229284725|gb|EEN55458.1| hypothetical protein BRAFLDRAFT_223862 [Branchiostoma floridae]	49.33	2e-10	sp|Q69ZI1|SH3R1_MOUSE	E3 ubiquitin-protein ligase SH3RF1 OS=Mus musculus GN=Sh3rf1 PE=1 SV=2	50	5e-12	C3YW04	C3YW04_BRAFL Putative uncharacterized protein OS=Branchiostoma floridae GN=BRAFLDRAFT_223862 PE=4 SV=1	-	-	-	-	-	-	-	K11997|1|4e-13|73.2|spu:583781|tripartite motif-containing protein 2/3!K12028|2|3e-11|67.0|oaa:100079651|tripartite motif-containing protein 59!K12171|3|4e-11|66.6|dre:556523|E3 ubiquitin-protein ligase SH3RF [EC:6.3.2.19]	-	-
58	Unigene25938_All	56 583 large subunit ribosomal protein L19e, cytoplasmic [Guillardia theta CCMP2712]	29582	MSNLRLPKRLAASVLNCGRNKIWLDPNEINEIANANSRQNIRKLIKDGLIIKKPVAVHSRARVRKNTIARRKGRHSGYGKRKGTANARMPQKIIWIRRMRVLRRLLKKYREAKKIDRHLYHELYKKSKGNVFKNKRVLMEYIHKKKAEKSRSKMFAEQAEAMRNKSKEARRRREER	39	4.5	-	2	2	1	1	---	---	---	1	1	1	-	-	-	Unigene25938_All	86.96	1e-57	gi|70909755|emb|CAJ17303.1|	ribosomal protein L19e [Curculio glandium]	82.42	7e-70	sp|P36241|RL19_DROME	60S ribosomal protein L19 OS=Drosophila melanogaster GN=RpL19 PE=1 SV=2	86.96	4e-57	Q4GXF9	Q4GXF9_CURGL Ribosomal protein L19 (Fragment) OS=Curculio glandium GN=rpL19e PE=2 SV=1	SPCC1682.14	202	2e-52	COG2147	Ribosomal protein L19E	J	Translation, ribosomal structure and biogenesis ;	K02885|1|5e-73|273|spu:593861|large subunit ribosomal protein L19e	GO:0006412//translation	GO:0003735//structural constituent of ribosome	GO:0005840//ribosome
59	CL7821.Contig2_All	193 642 minus strand transcription factor BTF3-like protein [Phytophthora sojae]	21463	QKLRAQVKDVRIGGKGTARRKRKHLHKTAVGDDRKLQNALKRLAVNSIHGIEEVIMFKADGNVLHFNNPKVQASPAANTFAIMGHAETKKMNDVPGIINHLGMETANSLQKLVQGMTESQGKEFVPETIDEEDDDVPDLVENFDAPSKEE	319	23.3	-	7	7	2	2	1.197	0.878	0.934	7	7	5	-	-	*	CL7821.Contig2_All	64.04	6e-34	gi|318103837|ref|NP_001188219.1|	transcription factor btf3-like protein 4 [Ictalurus punctatus] >gi|308322405|gb|ADO28340.1| transcription factor btf3-like protein 4 [Ictalurus furcatus] >gi|308324337|gb|ADO29303.1| transcription factor btf3-like protein 4 [Ictalurus punctatus]	63.16	9e-34	sp|Q96K17|BT3L4_HUMAN	Transcription factor BTF3 homolog 4 OS=Homo sapiens GN=BTF3L4 PE=1 SV=1	68.82	9e-30	H2ZFN9	H2ZFN9_CIOSA Uncharacterized protein OS=Ciona savignyi GN=Csa.1484 PE=4 SV=1	-	-	-	-	-	-	-	K01527|1|4e-36|150|cin:613214|nascent polypeptide-associated complex subunit beta	-	-
60	Unigene361_All	441 1580 minus strand cytochrome P450 [Populus trichocarpa] >gi|222832209|gb|EEE70686.1| cytochrome P450 [Populus trichocarpa]	52016	HGPIASFWYGPKFTVSVASPDLLSDLKGVFDRPAELFSVYEPIVGPDGIRFTNGVEGRKRRALINPVLAHDNLDQFCITFSQLGQEVVKKLSSTPNDDHIPLCQYSLALTIKALAQAAFGNYFKDDRKCYELKRNYEICWHEMEARVGGELDQEGSENMKKVDEALKELKKMIKEAVKERQANPPKSNQKAFIDVILENSSTYSDATMISEAMSIMVEGFHTSGYLLAWTLYFIATHTDVEEKLYQEISKVIGNKESVSHEDISKLKYLQQVLNESMRLSALIPWAAKVQDLDIELGGHIIPKGTSVITALGVVFQDETVWPLPNQFNPDRFNAENVKGRSQFAFQPFGLPQRICPGNQFALYELSIFVSLLVRSFKWKL	344	17.4	-	12	12	5	5	1.194	0.975	1.171	12	12	12	-	-	-	Unigene361_All	47.77	4e-104	gi|260794078|ref|XP_002592037.1|	hypothetical protein BRAFLDRAFT_265292 [Branchiostoma floridae] >gi|229277250|gb|EEN48048.1| hypothetical protein BRAFLDRAFT_265292 [Branchiostoma floridae]	33.92	2e-21	sp|O64635|C76C4_ARATH	Cytochrome P450 76C4 OS=Arabidopsis thaliana GN=CYP76C4 PE=2 SV=1	51.3	3e-29	H3ILW1	H3ILW1_STRPU Uncharacterized protein (Fragment) OS=Strongylocentrotus purpuratus GN=SPU_015120gn PE=4 SV=1	AGc2890	123	7e-28	COG2124	Cytochrome P450	Q	Secondary metabolites biosynthesis, transport and catabolism ;	K07435|1|5e-105|381|bfo:BRAFLDRAFT_265292|cytochrome P450, family 20, subfamily A	-	-
61	CL1646.Contig1_All	3 275 peptidyl-prolyl cis-trans isomerase ppi1 [Phytophthora infestans T30-4] >gi|262112412|gb|EEY70464.1| peptidyl-prolyl cis-trans isomerase ppi1 [Phytophthora infestans T30-4]	11863	SIYGKTFEDEFHPELKHTGAGIISMANSGQNTNGSQFFFTLAPLQWLDGKHTVFGRLSAGAGVLKRMGMVETDNNDRPVEDIRILKAYPDS	49	12.1	-	1	1	1	1	---	---	---	1	1	1	-	-	-	CL1646.Contig1_All	74.16	4e-34	gi|260784005|ref|XP_002587060.1|	hypothetical protein BRAFLDRAFT_116129 [Branchiostoma floridae] >gi|229272196|gb|EEN43071.1| hypothetical protein BRAFLDRAFT_116129 [Branchiostoma floridae]	70.79	2e-34	sp|Q9D0W5|PPIL1_MOUSE	Peptidyl-prolyl cis-trans isomerase-like 1 OS=Mus musculus GN=Ppil1 PE=2 SV=1	74.71	9e-33	H3DB50	H3DB50_TETNG Uncharacterized protein OS=Tetraodon nigroviridis GN=PPIL1 PE=3 SV=1	SPAC57A10.03	129	1e-30	COG0652	Peptidyl-prolyl cis-trans isomerase (rotamase) - cyclophilin family	O	Posttranslational modification, protein turnover, chaperones ;	K12733|1|4e-35|145|bfo:BRAFLDRAFT_116129|peptidyl-prolyl cis-trans isomerase-like 1 [EC:5.2.1.8]	GO:0006457//protein folding;GO:0000398//mRNA splicing, via spliceosome;GO:0000413//protein peptidyl-prolyl isomerization	GO:0003755//peptidyl-prolyl cis-trans isomerase activity	GO:0071013//catalytic step 2 spliceosome
62	CL9384.Contig2_All	96 1013 minus strand putative glutathione S-transferase isoform 1 [Galdieria sulphuraria]	42670	ISKKGEFKRRDSAFRNFITADGSSGFKAEKDRYHLYVSLACPWAHRTLIVRKLKGLEEIFPYTVVDWMLGENGWNFTDKKPKCTLDPVNGATYVREIYFKADPEYAANFTVPVIWDKKTNTIVNNESAEIIRMMNTEFNEFSTTPEQKQLDLYPEHLRTQIEELNSWIYPQINNGVYRAGFARSQEAYDEAVKEVFEGLDKAEEILSKQRYLTGNTITEADVRLLTTLLRFDKVYVGHFKCNKKRIIDYPNIWGFVRDMYQLSGISGTVDFEHIEKHYQASHRSINPHGIVAIGPDLDFNAPHDRD	193	23.5	-	7	7	5	5	0.854	0.814	0.665	5	5	5	-	-	-	CL9384.Contig2_All	72.61	3e-135	gi|291239071|ref|XP_002739449.1|	PREDICTED: hypothetical protein [Saccoglossus kowalevskii]	58.52	3e-101	sp|P42620|YQJG_ECOLI	Uncharacterized protein yqjG OS=Escherichia coli (strain K12) GN=yqjG PE=1 SV=1	70.59	2e-134	C3XTJ2	C3XTJ2_BRAFL Putative uncharacterized protein OS=Branchiostoma floridae GN=BRAFLDRAFT_122160 PE=4 SV=1	yqjG	368	7e-102	COG0435	Predicted glutathione S-transferase	O	Posttranslational modification, protein turnover, chaperones ;	K07393|1|9e-136|483|bfo:BRAFLDRAFT_122160|putative glutathione S-transferase	-	-
63	Unigene25552_All	166 1974 minus strand putative cell division related protein; 50012-47994 [Arabidopsis thaliana]	94679	DGDQTKAFRQLHTALTVKVEPVGRWFEARFKRQHHRTSGSLRDSTQDVTGEDSESEEEEDLIEEEEDDIGLQGLDPSDWKSQDHYAVLGISKSRYRASDDDVKKAYKRRVLRYHPDKKKARGEDVGEDEHKFFSCITRAFEILGNVTKRRAYDSVDPEINDDIPEVDEDSKSNFFEVFTEVFERNERFSTKKSVPKLGDEKSTWEDVDRFYEFWYAFDSWREYSYLDEEEKEKGESREERKWIEKQNKVARQKRKKEEVIRIRTLVDNAHACDPRIKRFRDEEKKRKADEKRAKQDAIKAAALEREKERFAAEETIRLQKEKEEQEAKAKALVAKKEKEAHKKALRKVKKQLRETCKSNDYYAENEEQKLHNMQEVEMLCEKLSHTRLTALIENLQTNS…	69	1.7	-	2	2	1	1	1.039	0.706	1.041	2	2	2	-	-	-	Unigene25552_All	76.36	7e-17	gi|350596394|ref|XP_003361112.2|	PREDICTED: dnaJ homolog subfamily C member 2-like isoform 1 [Sus scrofa]	52.72	1e-141	sp|Q99543|DNJC2_HUMAN	DnaJ homolog subfamily C member 2 OS=Homo sapiens GN=DNAJC2 PE=1 SV=4	65.19	7e-51	H2MW69	H2MW69_ORYLA Uncharacterized protein OS=Oryzias latipes GN=DNAJC2 PE=4 SV=1	SPBC1778.01c	211	2e-54	COG5269	Ribosome-associated chaperone zuotin	JO	Translation, ribosomal structure and biogenesis ; Posttranslational modification, protein turnover, chaperones ;	K09522|1|8e-144|511|ecb:100058412|DnaJ homolog subfamily C member 2	GO:0051083//'de novo' cotranslational protein folding;GO:0030308//negative regulation of cell growth;GO:0045893//positive regulation of transcription, DNA-dependent	GO:0042393//histone binding;GO:0043130//ubiquitin binding;GO:0003682//chromatin binding;GO:0030544//Hsp70 protein binding	GO:0005829//cytosol;GO:0031965//nuclear membrane
64	Unigene4389_All	241 2178 predicted protein [Hordeum vulgare subsp. vulgare]	80567	MLRFANRVAVITGAGGGLGREYALLLASRGAAVIVNDLGGDTKGGGKSSAAADKVVQEIRDKGGRAVPNYDSVEDGEKIIETALKHFGRIDILVNNAGILRDRTIARTSDLDWDLVHRVHLRGSFLVSRAAWPHMKKQNFGRIIMTASAAGIYGNFGQTNYSAAKLGLAGMSNTLALEGRKYNIFCNTIAPVAISRMTEDIFPDEIKPLLKPVNVAPLVAYLCHEDSEETGGLFEVGAGWVGKLRWQRANGAVCLKSDQGITPESVRDNWEQITDFDESSNPSSVAESMTTILDSIRQAQSAPPPSGPPVTSDNPSDAVGHVLPTNNFEYTSRDVMLYNLGVGVSTQQSDYLKFLFELNQDFCVLPTFGVIPAFSALQSLLSGDVPGMNSINPARILHG…	1016	23.2	1	37	37	11	11	1.534	1.094	3.198	34	35	35	*	-	*	Unigene4389_All	77.06	6e-104	gi|115361554|gb|ABI95866.1|	17-beta-hydroxysteroid dehydrogenase type 4 [Acanthopagrus schlegelii]	60.28	0	sp|P97852|DHB4_RAT	Peroxisomal multifunctional enzyme type 2 OS=Rattus norvegicus GN=Hsd17b4 PE=1 SV=3	77.06	2e-103	Q06AS2	Q06AS2_ACASC 17-beta-hydroxysteroid dehydrogenase type 4 (Fragment) OS=Acanthopagrus schlegelii PE=2 SV=1	MT0156	285	2e-76	COG1028	Dehydrogenases with different specificities (related to short-chain alcohol dehydrogenases)	IQR	Lipid transport and metabolism ; Secondary metabolites biosynthesis, transport and catabolism ; General function prediction only ;	K12405|1|0.0|805|spu:581580|3-hydroxyacyl-CoA dehydrogenase / 3a,7a,12a-trihydroxy-5b-cholest-24-enoyl-CoA hydratase [EC:1.1.1.35 4.2.1.107]	GO:0008210//estrogen metabolic process;GO:0036109//alpha-linolenic acid metabolic process;GO:0006699//bile acid biosynthetic process;GO:0033540//fatty acid beta-oxidation using acyl-CoA oxidase;GO:0036112//medium-chain fatty-acyl-CoA metabolic process;GO:0036111//very long-chain fatty-acyl-CoA metabolic process;GO:0008209//androgen metabolic process	GO:0016508//long-chain-enoyl-CoA hydratase activity;GO:0044594//17-beta-hydroxysteroid dehydrogenase (NAD+) activity;GO:0033989//3alpha,7alpha,12alpha-trihydroxy-5beta-cholest-24-enoyl-CoA hydratase activity;GO:0005102//receptor binding;GO:0003857//3-hydroxyacyl-CoA dehydrogenase activity;GO:0042803//protein homodimerization activity	GO:0005778//peroxisomal membrane;GO:0005782//peroxisomal matrix
65	Unigene8586_All	4 774 minus strand hypothetical protein CHLNCDRAFT_33654 [Chlorella variabilis]	36231	TGKWGQKHVSLGALGDSYYEYLLKSFILTGGSDTQALEMYREAIEAMERKMKQTSNSGLVFFGDFRGAKVEKKMDHLSCFSGGMFALGSKYINNPEHYLELGAQITETCHKSYENSATKLGPEAFRFEGHGEAVAMRQNEKYYILRPETIESYFVMWRLTKDQKYRDWGWQAVEAIEKNCRVDAGFSGVKDVYASRVVHDDVQQSFFLAETLKYLYLLYSDEDFISLDEWVFNTEAHPLPIRKNLRUHQRNERRRKW	52	10.9	-	3	3	2	2	0.804	0.89	1.261	2	2	2	-	-	-	Unigene8586_All	71.43	5e-106	gi|390347136|ref|XP_786466.3|	PREDICTED: mannosyl-oligosaccharide alpha-1,2-mannosidase isoform B-like [Strongylocentrotus purpuratus]	61.89	2e-86	sp|P53624|MA121_DROME	Mannosyl-oligosaccharide alpha-1,2-mannosidase isoform A OS=Drosophila melanogaster GN=alpha-Man-I PE=1 SV=2	72	3e-85	H3I3K0	H3I3K0_STRPU Uncharacterized protein (Fragment) OS=Strongylocentrotus purpuratus GN=SPU_008585gn PE=4 SV=1	-	-	-	-	-	-	-	K01230|1|5e-106|384|spu:581367|mannosyl-oligosaccharide alpha-1,2-mannosidase [EC:3.2.1.113]	GO:0048286//lung alveolus development;GO:0007585//respiratory gaseous exchange;GO:0009100//glycoprotein metabolic process	GO:0004571//mannosyl-oligosaccharide 1,2-alpha-mannosidase activity;GO:0005509//calcium ion binding	GO:0000139//Golgi membrane;GO:0005730//nucleolus;GO:0016021//integral to membrane
66	CL3618.Contig3_All	282 2363 LEN=2676; minus strand; translated	88319	VTAAIREIAQDCFVDCTARYAPVCGSDGNSYNNECELEGFAGCRNTPDLVKVKDRPCDVGTVVLLDSFEWDMKVPKAKLDAKSAITLNVFAELAKGSDSVSGKNLWKVGIFGSEWEDGYGDKYGYVNQILTTKQASKRAKKGKMLKLKNLRARFDISQIGCGAVAFFCVELARDRDSPVNFELRAGIVFGSIVACRRFDCLRPNITMETESDLPPTCFESCPPPEILGGTVCGNNSVQYDSFCELTKAARCQRVAVRFETLGECPPEITISGVFWTALARPNPDNRRMPLLNNDLYLFNEGSDIVGTDLWQISLFGSANEFGVGIRHNHIPQVLTSELSSQPLTGGYPFNIQFTVPFDTYAVGCEDVPYLCMELKRNPNASIEFVMKKSSGAKVVLSCR…	336	8.9	-	14	14	5	5	1.419	0.704	0.567	13	14	14	*	*	*	CL3618.Contig3_All	33.54	4e-13	gi|390347048|ref|XP_780976.3|	PREDICTED: uncharacterized protein LOC575485 [Strongylocentrotus purpuratus]	-	-	-	-	37.24	8e-13	H3JHF2	H3JHF2_STRPU Uncharacterized protein OS=Strongylocentrotus purpuratus GN=SPU_026008gn PE=4 SV=1	-	-	-	-	-	-	-	-	-	-
67	Unigene18480_All	244 4113 predicted protein [Ostreococcus lucimarinus CCE9901] >gi|144580473|gb|ABO98532.1| predicted protein [Ostreococcus lucimarinus CCE9901]	183316	DSNTRSRSPIQHQINEIQEQWEDLKRQLDDREGQLDNVLKESEPFHETKQDLNDWLIDFSNRISSLPAISQNPELVKQQREHTKALQKEADRKKQQLASMGDHHQQLVKLNPELTAMSEVELKLESVQSPYDDWCRKLDERLGKLQAALVQSQDFEDALDNMARWLDSKDKEVSSPKPISARPDVLRRQVIEHEELPKEIVKQVYTYQRLADKMDSLVQESESGPERRALEQKRDDMKSRWTDLERRVAERKDRLVDCSEKAKEYTDECNQFLPWLRSVEDRINSLGPVLMKPNVVKRQYDILRQLQDDINRHKDNHRALNDNSERLVRCTDVDHPFIRDQVKDINTRWDKLNADVARNVETLEGLNDRLSTFQENVNQSSSLLASCEGRLANQDSGRD…	399	14.7	-	26	26	15	15	1.064	0.992	0.751	22	22	22	-	-	-	Unigene18480_All	57.12	0	gi|390356390|ref|XP_003728769.1|	PREDICTED: microtubule-actin cross-linking factor 1, isoforms 1/2/3/5 isoform 2 [Strongylocentrotus purpuratus]	29.1	1e-146	sp|Q9QXZ0|MACF1_MOUSE	Microtubule-actin cross-linking factor 1 OS=Mus musculus GN=Macf1 PE=1 SV=2	45.84	0	H3HNL6	H3HNL6_STRPU Uncharacterized protein OS=Strongylocentrotus purpuratus GN=SPU_003260gn PE=4 SV=1	-	-	-	-	-	-	-	K10382|1|0.0|1064|spu:756550|dystonin	-	-
68	Unigene29854_All	326 670 minus strand predicted protein [Phaeodactylum tricornutum CCAP 1055/1] >gi|217411390|gb|EEC51318.1| predicted protein [Phaeodactylum tricornutum CCAP 1055/1]	21115	MDVNDKKPYQDSADKDKIRYDKEMANYKPSKGDKKKGKKRKKKDPNAPKRNLSAFFLYSNDERAAVRAQHADWNVGMVAKKLSEQWKVLDPQRKAKYDRGAVKDKERYMKAMEAY	143	11.3	-	4	4	1	1	0.984	0.998	0.578	4	4	4	-	-	*	Unigene29854_All	53.57	9e-14	gi|270005614|gb|EFA02062.1|	hypothetical protein TcasGA2_TC007692 [Tribolium castaneum]	45.31	6e-10	sp|Q09390|HMG12_CAEEL	High mobility group protein 1.2 OS=Caenorhabditis elegans GN=hmg-1.2 PE=2 SV=2	57.45	5e-08	A4RYV5	A4RYV5_OSTLU Predicted protein OS=Ostreococcus lucimarinus (strain CCE9901) GN=HMGB3505 PE=4 SV=1	YBR089c-a	70.5	6e-13	COG5648	Chromatin-associated proteins containing the HMG domain	B	Chromatin structure and dynamics ;	K10802|1|4e-20|96.3|spu:759480|high mobility group protein B1	-	-
69	CL4350.Contig1_All	1 606 LEN=1700; translated >CL4350.Contig3_All 1 606 LEN=1725; translated	28484	RPFSCTTVGQQEHNKMPSSGGKKFTREEELLLQDFSRNISTKSSALFYGNALIVAALPIWLFWRIHQLDITQTQTIILFAVVTLLSTWLIAFAYRNVKFSLRHKIAQKREDAVSKEVLKKLTPVEAKKMSRKEKDERILWKKNEVADHEATTFSIFYNNTLFILIILVASFFLLYTFDASVNYALSILGGAGLLALLSTGTK	24	6.9	1	1	1	1	1	---	---	---	1	1	1	-	-	-	CL4350.Contig1_All	71.52	3e-64	gi|241647552|ref|XP_002411161.1|	translocon-associated protein, gamma subunit, putative [Ixodes scapularis] >gi|215503791|gb|EEC13285.1| translocon-associated protein, gamma subunit, putative [Ixodes scapularis]	66.84	3e-64	sp|Q3SZ87|SSRG_BOVIN	Translocon-associated protein subunit gamma OS=Bos taurus GN=SSR3 PE=2 SV=1	72.26	2e-60	G3NVK5	G3NVK5_GASAC Uncharacterized protein (Fragment) OS=Gasterosteus aculeatus GN=SSR3 PE=4 SV=1	-	-	-	-	-	-	-	K13251|1|7e-68|256|spu:581129|translocon-associated protein subunit gamma	GO:0006613//cotranslational protein targeting to membrane	-	GO:0030176//integral to endoplasmic reticulum membrane;GO:0005784//Sec61 translocon complex
70	CL11497.Contig2_All	131 1039 minus strand ADP/ATP translocase [Phytophthora infestans]	41854	RKMTTAFSKEGAISFAKDLAAGGVAAAISKTAVAPIERVKLLLQVQHASKQITKEMQYKGIVDCFSRVTKEQGFFSLWRGNLANVIRYFPTQALNFAFKDKYKQIFLSGVDKKQFWRYFAGNLASGGAAGATSLCFVYPLDFARTRLAADIGKSMAERQFKGLGHCLTSIYKSDGMSGLYRGFSVSVQGIIIYRAAYFGFYDTAKGMLPDNIRGNFFISWMVAQTVTTCSGIISYPFDTVRRRMMMQSGRKDILYKNTLDCWRKIAKTEGGSAFFKGAFSNVLRGTGGALVLVLYDEIKKFLV	3238	48.5	-	145	145	17	17	1.09	0.942	1.155	120	119	120	*	-	*	CL11497.Contig2_All	83.39	7e-129	gi|72014931|ref|XP_780735.1|	PREDICTED: ADP,ATP carrier protein-like [Strongylocentrotus purpuratus]	81.02	1e-126	sp|Q09073|ADT2_RAT	ADP/ATP translocase 2 OS=Rattus norvegicus GN=Slc25a5 PE=1 SV=3	83.39	2e-128	H3IKL2	H3IKL2_STRPU Uncharacterized protein OS=Strongylocentrotus purpuratus GN=SPU_014660gn PE=3 SV=1	-	-	-	-	-	-	-	K05863|1|9e-130|463|spu:575225|solute carrier family 25 (mitochondrial adenine nucleotide translocator), member 4/5/6/31	GO:0055085//transmembrane transport;GO:0050796//regulation of insulin secretion;GO:0007059//chromosome segregation;GO:0019048//virus-host interaction;GO:0006112//energy reserve metabolic process;GO:0044281//small molecule metabolic process;GO:0015853//adenine transport	GO:0015207//adenine transmembrane transporter activity;GO:0005515//protein binding	GO:0005743//mitochondrial inner membrane;GO:0042645//mitochondrial nucleoid;GO:0071817//MMXD complex;GO:0005887//integral to plasma membrane
71	CL685.Contig1_All	379 1002 LEN=1002; translated	24309	PDGSYGAYWYYSTDLSSNDRPFISLEEGIESGPGYESGEFDILPNGSLLINEVSTQHDNFFGLATLATIDDDPILEDVRVVVYDKPYEPYPTIDATGCDQKSLCFLELNAASSLSCNVLRVGAVLDDLSWKLRTNSGDEQISSQSKSVPTSVNELQSYHTVVNISLPTSLSLRLFVCAARSNVSEVGNNESTILVESGTLEASSEPLL	38	5.3	1	2	2	1	1	---	---	---	1	1	1	-	-	-	CL685.Contig1_All	-	-	-	-	-	-	-	-	34	2e-06	H3IUY9	H3IUY9_STRPU Uncharacterized protein OS=Strongylocentrotus purpuratus GN=SPU_018015gn PE=4 SV=1	-	-	-	-	-	-	-	-	-	-
72	Unigene33484_All	23 499 minus strand hypothetical protein AURANDRAFT_34507 [Aureococcus anophagefferens] >gi|323455673|gb|EGB11541.1| hypothetical protein AURANDRAFT_21483 [Aureococcus anophagefferens]	25154	FNMAEQNERAYQKQPTVFQNKKRILLGTGKVRDQRLVRNIGLGFKTPKEAKLGTYIDKKCPFTGNVHIRGRILNGIVVRMKMQRSIVIRRDYLHYIPKYKRFEKRHKNMSVHISPCFRDVNLGDSVTVGECRPLSKTIRFNVLKVNKAPGSEKKQFQKF	384	32.1	-	21	21	5	5	0.64	0.983	0.926	20	20	20	*	-	-	Unigene33484_All	84.11	2e-47	gi|449277332|gb|EMC85558.1|	40S ribosomal protein S11, partial [Columba livia]	79.87	2e-67	sp|Q3T0V4|RS11_BOVIN	40S ribosomal protein S11 OS=Bos taurus GN=RPS11 PE=2 SV=3	84.11	1e-46	H0YQN6	H0YQN6_TAEGU Uncharacterized protein (Fragment) OS=Taeniopygia guttata GN=Tgu.7169 PE=3 SV=1	YDR025w	199	2e-51	COG0186	Ribosomal protein S17	J	Translation, ribosomal structure and biogenesis ;	K02949|1|2e-67|254|ssc:100513660|small subunit ribosomal protein S11e	GO:0006413//translational initiation;GO:0019083//viral transcription;GO:0006414//translational elongation;GO:0006415//translational termination;GO:0006614//SRP-dependent cotranslational protein targeting to membrane;GO:0000184//nuclear-transcribed mRNA catabolic process, nonsense-mediated decay	GO:0019843//rRNA binding;GO:0003735//structural constituent of ribosome	GO:0022627//cytosolic small ribosomal subunit
73	Unigene8197_All	161 1237 predicted protein [Hordeum vulgare subsp. vulgare]	51040	QKDNEKEVKLSKKSVIERGLVTETPKAKEVIGEHANYCSINLEKKLFPGDVLGYVTPWNGHGYDVAKIFGGKFSAISPVWLQIIRKAPGVFAVNGGHDIDKGWVKDVKKNGKRKVEVAPRLLFDGWTGRDYVEVFESEKEIQALSIAAVNFYKKNNFDGVVVEIWNQLGGQRKLDLIHLLIDMSEEFHKETMTFYVVIPPPLQPGSSATGVFTADDFEMLSAVVDGFSLMTYDYSNSQRPGPNSPISWVKQCVEAIAPEAGPRRSKILLGLNFYGYDFSSHSGEAVIGSKYLELLKKHKLKWDSESKEHYFEYKTAAGSHKVYYPSLMSINARLELAKELGTGVSIWELGQGLDYFYDL	92	8.4	-	2	2	2	2	1.05	0.646	0.887	2	2	2	-	-	-	Unigene8197_All	69.49	7e-17	gi|31541939|ref|NP_080798.2|	chitinase domain-containing protein 1 isoform 2 precursor [Mus musculus]	53.72	6e-108	sp|Q68EX9|CHID1_XENLA	Chitinase domain-containing protein 1 OS=Xenopus laevis GN=chid1 PE=2 SV=1	69.49	5e-15	H2LQ71	H2LQ71_ORYLA Uncharacterized protein OS=Oryzias latipes GN=CHID1 PE=4 SV=1	CAC1556	80.9	3e-15	COG3858	Predicted glycosyl hydrolase	R	General function prediction only ;	K01183|1|4e-08|59.3|cqu:CpipJ_CPIJ004564|chitinase [EC:3.2.1.14]	-	GO:0003824//catalytic activity	-
74	Unigene6090_All	1 1020 LEN=1632; minus strand; translated	43390	XWQCXRKNNRRNSLTTLNNYHTTVETKGNFKHGVDEAAIALCTFLVLFDAAAAVIDCSGLNIPATTTCKDYVAYGAADVAVERIALNRFSDDDQEIFRVVLANISNKYYPSIKIEPQNVAIVELFENREGVLILSFFIMNPSGSEYFPILFRTKELHLLMELNMDAINDRLPYTIEARPPEDDYPLFFPVWAIVIIVYLVIVLIVFLIVLASRNWKDDKSGSMDVESQGTEPVNKTYTSYDDDDYSTVTRKVATDPNQNDYDIVKKNNTQDGAMQTPRTVAMQVRPSDIDKTTAVIETQPDAISKEPDATSSGSDTSKNEGVVNDAYESVDGGDQMTTET	17	1.8	-	1	1	1	1	---	---	---	-	-	-	-	-	-	Unigene6090_All	29.92	7e-11	gi|390357713|ref|XP_003729081.1|	PREDICTED: uncharacterized protein LOC100890370 [Strongylocentrotus purpuratus]	-	-	-	-	34.62	2e-07	H3JPZ8	H3JPZ8_STRPU Uncharacterized protein OS=Strongylocentrotus purpuratus GN=SPU_028704gn PE=4 SV=1	-	-	-	-	-	-	-	-	-	-
75	Unigene5913_All	3 614 minus strand predicted protein [Hordeum vulgare subsp. vulgare]	31059	TSVDIKLKQWAEQTLPKTSVEVGSEALMKEFDRLIEKSKANKDTDVLFDKLKSAVKTKGLERHKWQTNAVDSIKVIQLNALEDRSVHDRQQWDEAISFMEKTLHQRLKETEAKINELNGPGTTERWMHWKSLTPEQVNRRQTQEELEKLLQSEAKHQPQLSADEITTVKKNLQTKGVDVENNFIQQTWHPLYRKRFLLSSLSLA	82	25	-	6	6	4	4	0.827	0.966	0.89	3	5	5	*	-	-	Unigene5913_All	59.8	5e-69	gi|390345487|ref|XP_003726347.1|	PREDICTED: dynamin-like 120 kDa protein, mitochondrial-like [Strongylocentrotus purpuratus]	51.74	4e-54	sp|O93248|OPA1_ONCMA	Dynamin-like 120 kDa protein, mitochondrial OS=Oncorhynchus masou GN=opa1 PE=2 SV=1	58.47	2e-58	H3HYL4	H3HYL4_STRPU Uncharacterized protein (Fragment) OS=Strongylocentrotus purpuratus GN=SPU_006815gn PE=4 SV=1	-	-	-	-	-	-	-	-	GO:0008053//mitochondrial fusion;GO:0035073//pupariation	GO:0005525//GTP binding	-
76	CL10289.Contig1_All	320 844 minus strand myosin - like protein [Arabidopsis thaliana]	23919	IYQMLVRIIENKLQPMILPAMLESDMAGLAPTKSRSDGESRNISIDSLIKQLSTHLTTMNRHGMDPEVIRQVIKQSFYLITASTINNILLRKDMCHWSKGVQIRYNLSEMEEWLRSHRLYDRNMEHTLEPLVQVAQLLQVKKRTDDDIKLICDTCSELTTTQIVKILHLYTPDEY	77	16	-	2	2	2	2	1.165	1.041	1.127	2	2	2	-	-	-	CL10289.Contig1_All	72.28	1e-73	gi|47550963|ref|NP_999655.1|	myosin V [Strongylocentrotus purpuratus] >gi|8745416|gb|AAF78910.1|AF248863_1 myosin V [Strongylocentrotus purpuratus]	55	7e-54	sp|Q02440|MYO5A_CHICK	Unconventional myosin-Va OS=Gallus gallus GN=MYO5A PE=1 SV=1	72.28	4e-73	Q9NBH3	Q9NBH3_STRPU Myosin V OS=Strongylocentrotus purpuratus PE=2 SV=1	YOR326w	74.7	8e-14	COG5022	Myosin heavy chain	Z	Cytoskeleton ;	K10357|1|2e-74|277|spu:373234|myosin V	GO:0051648//vesicle localization;GO:0007267//cell-cell signaling;GO:0043473//pigmentation;GO:0030048//actin filament-based movement;GO:0065008//regulation of biological quality;GO:0050896//response to stimulus;GO:0048513//organ development;GO:0019226//transmission of nerve impulse;GO:0044249//cellular biosynthetic process;GO:0032940//secretion by cell	GO:0003779//actin binding;GO:0000146//microfilament motor activity;GO:0005524//ATP binding	GO:0016023//cytoplasmic membrane-bounded vesicle;GO:0030426//growth cone;GO:0001726//ruffle;GO:0016459//myosin complex
77	Unigene1110_All	4 759 PREDICTED: zinc-metallopeptidase, peroxisomal-like [Brachypodium distachyon]	34619	PSQRMRHREIQLPDGCYYVYQRHNEVHNVSGIEAYFQTTLQSTRNNMLLELFCQIISEPCFDMLRTKEQLGYIVFSGVRRSNGVQGLRFVIQSDKPPQYLDHRIEAFLVSMKSYINEMTDEDYQKNVAALAMKRSEKPKRLASEAIRHWTEISSRQYNFERDEIEVENLKSITKGDLMNFYEKLLDASSPGRHKIAVYVQPPMQARDGLKGASDQPDIAVKEEPKLIEAPQLKECVTITDITTFKSRLPLFP	66	3.6	-	2	2	1	1	1.25	1.384	1.449	2	2	2	-	-	-	Unigene1110_All	64.37	1e-88	gi|390364412|ref|XP_779964.3|	PREDICTED: insulin-degrading enzyme-like, partial [Strongylocentrotus purpuratus]	53.97	3e-76	sp|Q9JHR7|IDE_MOUSE	Insulin-degrading enzyme OS=Mus musculus GN=Ide PE=1 SV=1	64.61	4e-87	H3IDY6	H3IDY6_STRPU Uncharacterized protein OS=Strongylocentrotus purpuratus GN=SPU_012294gn PE=4 SV=1	SPACUNK4.12c	110	2e-24	COG1025	Secreted/periplasmic Zn-dependent peptidases, insulinase-like	O	Posttranslational modification, protein turnover, chaperones ;	K01408|1|9e-77|286|dre:561390|insulysin [EC:3.4.24.56]	GO:0051603//proteolysis involved in cellular protein catabolic process;GO:1901143//insulin catabolic process;GO:0008340//determination of adult lifespan;GO:0051291//protein heterooligomerization;GO:0010815//bradykinin catabolic process;GO:0051289//protein homotetramerization;GO:0045861//negative regulation of proteolysis;GO:0050435//beta-amyloid metabolic process;GO:0006200//ATP catabolic process…	GO:0031626//beta-endorphin binding;GO:0005102//receptor binding;GO:0008270//zinc ion binding;GO:0043559//insulin binding;GO:0043130//ubiquitin binding;GO:0001540//beta-amyloid binding;GO:0001948//glycoprotein binding;GO:0004222//metalloendopeptidase activity;GO:0016887//ATPase activity;GO:0042803//protein homodimerization activity;GO:0005524//ATP binding	GO:0031597//cytosolic proteasome complex;GO:0005615//extracellular space;GO:0009986//cell surface;GO:0005634//nucleus;GO:0005782//peroxisomal matrix;GO:0005739//mitochondrion
78	CL10129.Contig1_All	446 1138 reticulon-like protein B5 [Arabidopsis thaliana] >gi|75100637|sp|O82352.1|RTNLE_ARATH RecName: Full=Reticulon-like protein B5; Short=AtRTNLB5 >gi|3702332|gb|AAC62889.1| expressed protein [Arabidopsis thaliana] >gi|15450759|gb|AAK96651.1|	31431	EKEEDTSPSEGSLLQEQPAEPTSTVDTEKAASPTPGKSLEELLNLKNLDPRVVELVYWRDVKKSGVVFGSGLLILLALSIFSIISVVAYFLLALLTVTIGFRVYKTVMAAVQKSDESNPFKPFMEADLTLSQDQVADYSKMGVEHFNNHIMKLRHYLLVEDLVDSIKFAVFLYLLTYLGSWFNGLTLVMLAYILIFAAPVVYEKYQTQIDENINKVNKQVEAQLAVIKEKL	323	13	-	15	15	3	3	1.447	1.047	1.674	14	15	15	-	-	-	CL10129.Contig1_All	66.3	2e-50	gi|390345025|ref|XP_786176.3|	PREDICTED: reticulon-4-like [Strongylocentrotus purpuratus]	51.67	2e-42	sp|Q99P72|RTN4_MOUSE	Reticulon-4 OS=Mus musculus GN=Rtn4 PE=1 SV=2	64.71	6e-45	H3JI19	H3JI19_STRPU Uncharacterized protein OS=Strongylocentrotus purpuratus GN=SPU_026229gn PE=4 SV=1	-	-	-	-	-	-	-	K00688|1|2e-31|135|ame:409267|starch phosphorylase [EC:2.4.1.1]	-	-
79	CL3969.Contig2_All	945 1439 3&apos;-5&apos; exonuclease domain-containing protein / KH domain-containing protein [Galdieria sulphuraria]	22700	LSLGCKGVRLRNGGPMTLLKMSTMDGVAYIFDLLASDDKKEMFESGGLKEILEDEEIIKVTYDCRTEQKALYSQFDVVLRNVFDVSIAYTVISEQCHVTSRSAPKFRPARPKFSELCSIFGVRKPRNQRAFMEQMNSTKDFWATRPLTDEMLDFAIDDVLCLVPV	170	11.5	-	8	8	2	2	0.979	0.941	1.322	7	7	7	-	-	*	CL3969.Contig2_All	42.86	3e-08	gi|170050482|ref|XP_001861331.1|	conserved hypothetical protein [Culex quinquefasciatus] >gi|167872069|gb|EDS35452.1| conserved hypothetical protein [Culex quinquefasciatus]	-	-	-	-	42.86	9e-08	B0WVA9	B0WVA9_CULQU Putative uncharacterized protein OS=Culex quinquefasciatus GN=CpipJ_CPIJ010836 PE=4 SV=1	-	-	-	-	-	-	-	-	-	-
80	Unigene31887_All	86 532 minus strand glutamyl-tRNA (Gln) amidotransferase subunit A [Paulinella chromatophora] >gi|171191720|gb|ACB42682.1| glutamyl-tRNA (Gln) amidotransferase subunit A [Paulinella chromatophora]	19844	GFHATSMSSFVSKSFKTRINDVGPSPKLLYLLGQYFAESYPGVIYNKGQNLRRLLAKQYDDALNKFDVLALPTIPFTAPRLPDKNISTEDYLANLGNISVNTRPTNLTGHPAISLKAGFHHVNGLPIGTMLISKHFDEVTLFKVASHFE	29	6	-	1	1	1	1	---	---	---	1	1	1	-	-	-	Unigene31887_All	55.1	6e-09	gi|260813975|ref|XP_002601691.1|	hypothetical protein BRAFLDRAFT_94571 [Branchiostoma floridae] >gi|229286993|gb|EEN57703.1| hypothetical protein BRAFLDRAFT_94571 [Branchiostoma floridae]	40.79	1e-17	sp|Q46L72|GATA_PROMT	Glutamyl-tRNA(Gln) amidotransferase subunit A OS=Prochlorococcus marinus (strain NATL2A) GN=gatA PE=3 SV=1	46.9	6e-31	H3J1F1	H3J1F1_STRPU Uncharacterized protein OS=Strongylocentrotus purpuratus GN=SPU_020324gn PE=4 SV=1	SSO2122	100	1e-21	COG0154	Asp-tRNAAsn/Glu-tRNAGln amidotransferase A subunit and related amidases	J	Translation, ribosomal structure and biogenesis ;	K01426|1|2e-31|134|bfo:BRAFLDRAFT_94568|amidase [EC:3.5.1.4]	-	-
81	Unigene15132_All	770 1438 minus strand TPA: hypothetical protein ZEAMMB73_082154 [Zea mays]	30146	YKRVVVAVRPKGQDKLSLKMFKEVPASALEQLLPDGKIRMSKFDQGLIATSVGVGSLTLLVKAVSSLADIQLKWTLIVAGVTGLAGLRFWNSYKNRRVKYLMQLSRTLYYKNVANNRGLLALLVDRAQDESFKEALIMYTFLLSHRRPSSTEPLTAEKSGSQSQLLGGIRSSILERNVERWVKSKTNADVEFDSSAASELLKEFGILHVDEEDANAVVPLASA	151	16.6	-	8	8	3	3	1.001	0.924	1.205	7	7	7	-	-	-	Unigene15132_All	63.68	2e-77	gi|390352276|ref|XP_797230.3|	PREDICTED: transmembrane protein 143-like [Strongylocentrotus purpuratus]	33.84	9e-20	sp|Q96AN5|TM143_HUMAN	Transmembrane protein 143 OS=Homo sapiens GN=TMEM143 PE=2 SV=1	63.68	9e-77	H3J9W2	H3J9W2_STRPU Uncharacterized protein OS=Strongylocentrotus purpuratus GN=SPU_023328gn PE=4 SV=1	-	-	-	-	-	-	-	-	-	-
82	Unigene4668_All	557 2425 minus strand PREDICTED: ubiquitin carboxyl-terminal hydrolase 5-like isoform 2 [Fragaria vesca subsp. vesca]	81779	LLISRDYETLPDPVWKALNLWYAGGPALPRNVIIPDPQKAIPVLELHPIHVKLLQHEKKQNKNGGWNGVSFGGLSLGSGQLGNLLNSSSSTTTPKKYLTHTACFSKLHTVQQVHEFLAQRIRIPNEEMRLWNFRDESNPALIEEDSATMEKVGIVEEQSILIEIRNKDLSWPEEMSLLAKNKQDKYKQVISEGGVTGLSNLGNTCFMNAAVQCISNTQPLTLYFKTDSYLHELNMSNLDGMKGHIARRYGELVNDLWSGTAKSIAPLKLRWTIAKYSRTFNDSQQHDSQELLSFLLDGLHEDLNRVRQKKYVELKDSDGRPDEEVAKEAWDSHLVRNQSVVVDLFQGLLKSQVRCKHCGNTSVRFDPFTFLSLPLPMESSMHIEIIVVRIDGSVPLKYG…	32	2.2	-	1	1	1	1	---	---	---	1	1	1	-	-	-	Unigene4668_All	83.33	4e-08	gi|390345682|ref|XP_003726385.1|	PREDICTED: ubiquitin carboxyl-terminal hydrolase 32 [Strongylocentrotus purpuratus]	63.3	3e-111	sp|P35125|UBP6_HUMAN	Ubiquitin carboxyl-terminal hydrolase 6 OS=Homo sapiens GN=USP6 PE=1 SV=2	68.04	2e-76	H2ZLN2	H2ZLN2_CIOSA Uncharacterized protein (Fragment) OS=Ciona savignyi PE=4 SV=1	SPCC1494.05c	185	2e-46	COG5560	Ubiquitin C-terminal hydrolase	O	Posttranslational modification, protein turnover, chaperones ;	K11837|1|1e-160|567|bfo:BRAFLDRAFT_121867|ubiquitin carboxyl-terminal hydrolase 6/32 [EC:3.1.2.15]	GO:0016579//protein deubiquitination;GO:0006508//proteolysis	GO:0008233//peptidase activity;GO:0004221//ubiquitin thiolesterase activity	GO:0005794//Golgi apparatus
83	CL10113.Contig2_All	143 802 minus strand glutathione S-transferase [Euphorbia esula]	32196	MALQFYYNPISCPSRSVRIFLKKTGLLVEEHIIDLSSDEQHSPEFLKINPRHCVPVLKDGDFILTEGWAILFYVIEKFSKDIDDHWYPKDLRKRSRVNEYLSYHDGSTRQLFSKVFRDEYLSKMRSYCKPSSEEDAKENVKQMEYVASQLQDTFLKDQKFLCGDEISIADILAVAEVIQPTLSGRDTTKNYPKLAAWVERVKESLNPEFDEVYKQFYEIR	208	28.2	-	10	10	4	4	1.082	1.451	1.123	9	9	9	-	*	-	CL10113.Contig2_All	43.72	9e-37	gi|115752364|ref|XP_794503.2|	PREDICTED: glutathione S-transferase theta-1-like, partial [Strongylocentrotus purpuratus]	41.49	6e-10	sp|Q03425|GSTZ2_DIACA	Glutathione S-transferase 2 (Fragment) OS=Dianthus caryophyllus GN=GST2 PE=2 SV=1	44.69	2e-36	H3I5D2	H3I5D2_STRPU Uncharacterized protein OS=Strongylocentrotus purpuratus GN=SPU_009236gn PE=3 SV=1	SMb20420	74.7	1e-13	COG0625	Glutathione S-transferase	O	Posttranslational modification, protein turnover, chaperones ;	K00799|1|9e-44|176|spu:574739|glutathione S-transferase [EC:2.5.1.18]	-	-
84	Unigene11953_All	154 1365 minus strand PREDICTED: mannose-6-phosphate isomerase [Vitis vinifera]	53630	LQCAVKNNAWGSIGTKSEVALLRQGGDSTFELQDDMTYAELWMGTHVKGDSILTSSEHAGKTLSQWVEEHPDCLGSKVRSKFNDQLPYLFKVLSINKTLSIQAHPNKTHAEQLNAKHPDIYVDDNHKPEMALALTPFEGMNGFKRLSKIVHFLEAIPEFRTVVGEKETKALQEACRTDPKGTSDSAKAVLKKSFTSFMNRDESLVSEQLDKLEKRFQKLVDEGQDISNVDGEIFLRLCKEYPGDAGSFVSYFFNVMTLKPGEAMFLQANEPHAYMSGDCIECMACSDNVVRAGLTAKYKDVPTLCEMLSYITSTPEERIFDSHVDPSDPCVTIYNPAIPDFAIAKVEIPAETRNHTLGAYDSGSIVLFIRGSATATSSSISETLSLRRGSVIFVAAGES…	36	4	-	2	2	1	1	1.056	0.918	1.142	2	2	2	-	-	-	Unigene11953_All	55.28	3e-129	gi|115698972|ref|XP_780304.2|	PREDICTED: mannose-6-phosphate isomerase-like [Strongylocentrotus purpuratus]	48.02	1e-113	sp|Q3SZI0|MPI_BOVIN	Mannose-6-phosphate isomerase OS=Bos taurus GN=MPI PE=2 SV=3	55.28	1e-128	H3HW94	H3HW94_STRPU Uncharacterized protein OS=Strongylocentrotus purpuratus GN=SPU_005978gn PE=3 SV=1	SPBC2G2.16	254	2e-67	COG1482	Phosphomannose isomerase	G	Carbohydrate transport and metabolism ;	K01809|1|4e-130|464|spu:574815|mannose-6-phosphate isomerase [EC:5.3.1.8]	GO:0006013//mannose metabolic process	GO:0004476//mannose-6-phosphate isomerase activity	-
85	Unigene18631_All	1 1507 LEN=1773; translated	67298	XICPTLFDETASSREPKFDNKTIIELEDDTTAALLRTAVFLAGTCILVEGGGIGAQVICPAGYKYYQGSCYSFKTEVVNFETAREICQADGGDLTSIMTRSENIYVGNMADGQRSWIGGIRTKSDAVTTSFRWVSREPWGFTSWRKREPNNWGGREHCIETNFVRRAWWNDHFCTKEKPFVCEISILXVKQQQQQQETKFXIYYSNVEARILNWAYAICKRPLTDQVXYRPPHVKKXFYIPGRILVLLPTLANFTNKAMSLPHIALYPIQPATPVSYPNHVIDTNTAPENVQFYVTFDGKTYPAQQPPPIKHVLDVGKIYSKTPSPAVDALAAPDLISMTEIWEREFRIIFASFLPHCWYLLKTFQSPSPRWRRFKDSAKVRFCCQGCGHAWTSMKGRV…	34	4	-	3	3	2	2	0.714	0.667	0.983	3	3	3	-	-	-	Unigene18631_All	66.04	8e-59	gi|260841805|ref|XP_002614101.1|	hypothetical protein BRAFLDRAFT_67313 [Branchiostoma floridae] >gi|229299491|gb|EEN70110.1| hypothetical protein BRAFLDRAFT_67313 [Branchiostoma floridae]	32.46	8e-08	sp|P35246|SFTPD_BOVIN	Pulmonary surfactant-associated protein D OS=Bos taurus GN=SFTPD PE=1 SV=2	66.04	3e-58	C3XQ89	C3XQ89_BRAFL Putative uncharacterized protein OS=Branchiostoma floridae GN=BRAFLDRAFT_67313 PE=4 SV=1	-	-	-	-	-	-	-	K06563|1|7e-13|75.9|mdo:100026844|CD209 antigen!K06560|2|7e-12|72.8|nve:NEMVE_v1g238062|mannose receptor, C type	-	-
86	Unigene36308_All	52 891 unnamed protein product [Blastocystis hominis]	43744	LASDSESDDADFVDDAVDDDGDVGGGGGRKIKSRLSSKKKEKRKSGSKHYIAAVKSNKKNQQIFEELEKAKKESLEALQHTPSLRKDDFMQQFQKRCPTPSRKQNLLKTELLHHINISLSTLRQPAVDVDESTNLEEFKKKCRCEESVDIKDVVQKAIQKESNGAVVKVYKTVKFAGREFEIEQQMDRGSRALKNYERESKSSVGGKFATLDKIYNELQPTKTINSVQKSHIDWHRFVDNGNLHGELKSRGGFLEKVEFLHRQDWISHEEESSLKKQRQI	24	2.1	-	1	1	1	1	---	---	---	-	-	-	-	-	-	Unigene36308_All	34.75	1e-14	gi|237838605|ref|XP_002368600.1|	hypothetical protein TGME49_064710 [Toxoplasma gondii ME49] >gi|211966264|gb|EEB01460.1| hypothetical protein TGME49_064710 [Toxoplasma gondii ME49]	-	-	-	-	34.75	4e-14	B9QEW6	B9QEW6_TOXGO Putative uncharacterized protein OS=Toxoplasma gondii GN=TGVEG_081560 PE=4 SV=1	-	-	-	-	-	-	-	-	-	-
87	Unigene23245_All	1 874 LEN=1073; translated	39556	VATDNLHVRVRXAITPKKKENFNIVFKDLLYFVVRLLRRSFFVPQSQYPKMEVLGVQLVLASALMCLAHGYMAYNDEIPPIERLAIRSYILRNLYDTTGVENEPATRKDEAAPETKPAIPPNTFVSGGTGEGKQHLGSDGKIPNKQVAIPEIQSGYDTPPNPCPVNAKVKDLEQVVSQRHPDSRCACINGWDEDKEDCTEASKCCLMNMPNLAEFVAKYQNEARVDGFADPFASNQYIGGGNKRAEHVAKKSPMLSKRSIRLHSDRIDRHFNPYLAGQRLSSNVAKKAPAY	59	10.3	-	3	3	2	2	0.918	1.341	0.852	2	2	2	-	-	-	Unigene23245_All	40.77	3e-30	gi|72007133|ref|XP_799858.1|	PREDICTED: uncharacterized protein LOC575887 [Strongylocentrotus purpuratus]	30.23	4e-07	sp|P27682|7B2_RAT	Neuroendocrine protein 7B2 OS=Rattus norvegicus GN=Scg5 PE=1 SV=1	40.77	1e-29	H3INR5	H3INR5_STRPU Uncharacterized protein OS=Strongylocentrotus purpuratus GN=SPU_015798gn PE=4 SV=1	-	-	-	-	-	-	-	-	-	-
88	Unigene22300_All	2 325 minus strand Carbon-nitrogen hydrolase (ISS) [Ostreococcus tauri] >gi|116060687|emb|CAL57165.1| Carbon-nitrogen hydrolase (ISS) [Ostreococcus tauri]	13365	FPELSLSLAKQGADILTYPSAFLQTTGLAHWEALLRARAIENQCYVVAAAQTGQLNSGRVTYGHSMVVDPWGQIIASCHEGQDVCLANIDLDYLKSVRKQMPVWSHRR	26	9.3	-	1	1	1	1	---	---	---	1	1	1	-	-	-	Unigene22300_All	73.15	1e-44	gi|260810064|ref|XP_002599824.1|	hypothetical protein BRAFLDRAFT_205706 [Branchiostoma floridae] >gi|229285106|gb|EEN55836.1| hypothetical protein BRAFLDRAFT_205706 [Branchiostoma floridae]	67.59	2e-39	sp|Q32LH4|NIT1_BOVIN	Nitrilase homolog 1 OS=Bos taurus GN=NIT1 PE=2 SV=1	73.15	6e-44	C3YVC0	C3YVC0_BRAFL Putative uncharacterized protein OS=Branchiostoma floridae GN=BRAFLDRAFT_205706 PE=4 SV=1	RSc2658	125	2e-29	COG0388	Predicted amidohydrolase	R	General function prediction only ;	K01506|1|3e-41|166|spu:585232|[EC:3.5.-.-]	GO:0006807//nitrogen compound metabolic process	GO:0000257//nitrilase activity	GO:0005739//mitochondrion
89	Unigene29444_All	639 1055 minus strand PREDICTED: E3 ubiquitin-protein ligase UPL2-like [Vitis vinifera]	17897	ADDSYFLETQEEGKPGRQCFPQRAALLKSMLNFLKKAIPDPAFADSIRHVMDGSLPRSLKHLISNAEYYGPSLFLLACEFVTVYVFQEPSLLSSLQDTGLTDVMLHALLIKDVPATKEVLGSLPNIFSALCLNARGLEA	29	5	-	2	2	1	1	---	---	---	1	1	1	-	-	-	Unigene29444_All	90.91	1e-52	gi|390339746|ref|XP_003725080.1|	PREDICTED: E3 ubiquitin-protein ligase HUWE1 isoform 2 [Strongylocentrotus purpuratus]	84.09	6e-60	sp|Q7Z6Z7|HUWE1_HUMAN	E3 ubiquitin-protein ligase HUWE1 OS=Homo sapiens GN=HUWE1 PE=1 SV=3	88.89	1e-48	G9K513	G9K513_MUSPF HECT, UBA and WWE domain containing 1 (Fragment) OS=Mustela putorius furo PE=2 SV=1	SPAC19D5.04	57.4	7e-09	COG5021	Ubiquitin-protein ligase	O	Posttranslational modification, protein turnover, chaperones ;	K10592|1|4e-60|229|mcc:700136|E3 ubiquitin-protein ligase HUWE1 [EC:6.3.2.19]	GO:0000209//protein polyubiquitination;GO:0006284//base-excision repair;GO:0016574//histone ubiquitination;GO:0006513//protein monoubiquitination;GO:0042787//protein ubiquitination involved in ubiquitin-dependent protein catabolic process;GO:0030154//cell differentiation	GO:0003677//DNA binding;GO:0004842//ubiquitin-protein ligase activity;GO:0005515//protein binding	GO:0005730//nucleolus;GO:0005737//cytoplasm
90	CL3669.Contig1_All	81 476 predicted protein [Ostreococcus lucimarinus CCE9901] >gi|144576235|gb|ABO94304.1| predicted protein [Ostreococcus lucimarinus CCE9901]	16494	GDYGRIALVSYGEQRRWTRLFFGDHSRTQQDVSDPGSDPLVERDDRGFCGWVPSFFRITDDDIRGKSGVDAVQYLLFQRYLIYLVFTVTVISMVIIMPINISGSQEIGKANFGKTTITNLPTDSGKLWAHTI	35	8.3	-	1	1	1	1	---	---	---	1	1	1	-	-	-	CL3669.Contig1_All	54.35	1e-36	gi|390344904|ref|XP_785977.3|	PREDICTED: transmembrane protein 63B isoform 2 [Strongylocentrotus purpuratus]	42.66	1e-17	sp|Q3TWI9|TM63B_MOUSE	Transmembrane protein 63B OS=Mus musculus GN=Tmem63b PE=1 SV=1	54.35	5e-36	H3JBM8	H3JBM8_STRPU Uncharacterized protein OS=Strongylocentrotus purpuratus GN=SPU_023958gn PE=4 SV=1	-	-	-	-	-	-	-	-	-	-
91	CL5720.Contig3_All	81 680 minus strand proteasome subunit beta type6 putative [Albugo laibachii Nc14]	25411	EESTGTTIMAVEFDGGVVIGADSRTTTGAYIANRVTDKLTKIHDNIYCCRSGSAADTQAIADVVSFQLEFHAIQMQQKPLVHTAANLFREMCYKYRDSLMAGIIVAGWDEKKGGQVFSVPLGGMIVQQGVALGGSGSTYMYAYVDATYKDNMTKEECYNFVSKGIALAMMRDGSSGGVIRLAAITKDGVERKTILGNELP	28	9	-	2	2	2	2	0.557	1.844	2.002	2	2	2	-	-	-	CL5720.Contig3_All	76.5	8e-89	gi|390338377|ref|XP_003724763.1|	PREDICTED: proteasome subunit beta type-6-like [Strongylocentrotus purpuratus]	71.5	3e-87	sp|Q3MHN0|PSB6_BOVIN	Proteasome subunit beta type-6 OS=Bos taurus GN=PSMB6 PE=1 SV=1	76.88	2e-89	G1KJL4	G1KJL4_ANOCA Proteasome subunit beta type (Fragment) OS=Anolis carolinensis GN=PSMB6 PE=3 SV=1	SPAC22D3.07	98.6	6e-21	COG0638	20S proteasome, alpha and beta subunits	O	Posttranslational modification, protein turnover, chaperones ;	K02738|1|4e-89|327|xla:397716|20S proteasome subunit beta 1 [EC:3.4.25.1]	GO:0051603//proteolysis involved in cellular protein catabolic process	GO:0004298//threonine-type endopeptidase activity	GO:0005737//cytoplasm;GO:0005839//proteasome core complex;GO:0005634//nucleus
92	Unigene25657_All	219 959 arginine/serine-rich splicing factor RS2Z37 transcript I [Physcomitrella patens subsp. patens]	32316	SANLFVGRLSKNVKERHVQDIFGAYGRLVRCDVKYGTGMAYAFVDYQYKRDAQDAMRYENDREIEGQRIVVEWARGPKRGSQGEDECYNCHQPGHFARDCEEARRFGGRSRGGGSRGGWRGGDRSRRRYSRSRSRSRSRDRTRHRSDSRDRSRSRDRSISRERKQSPHRRSRSKSRSPVRENRSRSKSRSRERNSRSRSRDRSRSPSKGRDNNEGGARGESPERSQREASPIVPNEQAEYNDGPNKN	26	4.5	1	2	2	1	1	---	---	---	1	1	1	-	-	-	Unigene25657_All	69.61	1e-36	gi|291244600|ref|XP_002742185.1|	PREDICTED: alternative splicing factor SRp20/9G8, putative-like [Saccoglossus kowalevskii]	46.05	2e-12	sp|Q13247|SRSF6_HUMAN	Serine/arginine-rich splicing factor 6 OS=Homo sapiens GN=SRSF6 PE=1 SV=2	63	1e-31	H3HUZ6	H3HUZ6_STRPU Uncharacterized protein OS=Strongylocentrotus purpuratus GN=SPU_005520gn PE=4 SV=1	SPAC16.02c	48.9	8e-06	COG0724	RNA-binding proteins (RRM domain)	R	General function prediction only ;	K12893|1|1e-12|73.6|rno:362264|splicing factor, arginine/serine-rich 4/5/6	GO:0048025//negative regulation of mRNA splicing, via spliceosome	GO:0046872//metal ion binding;GO:0097159//organic cyclic compound binding;GO:1901363//heterocyclic compound binding	GO:0005730//nucleolus
93	CL1263.Contig1_All	144 740 hypothetical protein PHYSODRAFT_353859 [Phytophthora sojae]	28836	TYKLIYFDMMSRGECPRLMFKTAGIEFEDFRISEEQWPEFQKTILHGMVPVLEVNGKRIIQSLAICRYIAREAGFYGSNNWESTRIDSICENIVDYEHDVDRLWQPHDSDEIKATLKKRYVEEKIPKIYGILETLLKENNDGNNFFVGEKISMADFYVFAFIDGTVRTHYPSNYDPKDFPKLAAHMERMKKIPQVKDWL	38	12.1	-	2	2	2	2	---	---	---	1	1	1	-	-	-	CL1263.Contig1_All	44.59	5e-26	gi|405978630|gb|EKC43007.1|	S-crystallin SL11 [Crassostrea gigas]	37.04	2e-14	sp|P27016|SCR18_OMMSL	S-crystallin SL18 OS=Ommastrephes sloanei PE=2 SV=1	50.53	4e-19	H3EY32	H3EY32_PRIPA Uncharacterized protein OS=Pristionchus pacificus GN=PPA14742 PE=3 SV=1	alr3195	49.3	5e-06	COG0625	Glutathione S-transferase	O	Posttranslational modification, protein turnover, chaperones ;	K01830|1|2e-28|125|api:100159421|prostaglandin-H2 D-isomerase [EC:5.3.99.2]!K00799|2|2e-28|125|api:100168850|glutathione S-transferase [EC:2.5.1.18]	-	-
94	Unigene12140_All	127 915 similar to guanine nucleotide exchange factor [Cyanidioschyzon merolae strain 10D]	36365	NILNQHLPRPGLEVSRELQKLMLRMKGEFMLEDGHSVDYHRLKEGDLFKSYEMKAVDLQHVDLTSLKENERKAFFINIYNALTIHGLAKCPTLPRSVLDVEKFWRSTGYIISGDEYSLDDIEHGVLRGNRPHPSSPELFFKDGDSRLQYVMSSLDPRVHFALVCGAKSCPPISVYSGTNIDSALDAATKSYLGSEITVDNEKEVISLPKLLQWYRTDFGQTSQEVVRWTLPFLDEAKKKKIEEILNKSDSSEIAVSYNEYNWH	38	3.8	-	2	2	1	1	---	---	---	1	1	1	-	-	-	Unigene12140_All	50.57	1e-77	gi|390354870|ref|XP_003728428.1|	PREDICTED: uncharacterized protein LOC100890992 [Strongylocentrotus purpuratus]	-	-	-	-	50.19	6e-72	C3Z4Y0	C3Z4Y0_BRAFL Putative uncharacterized protein OS=Branchiostoma floridae GN=BRAFLDRAFT_76126 PE=4 SV=1	-	-	-	-	-	-	-	-	-	-
95	CL8115.Contig1_All	182 1948 PREDICTED: LOW QUALITY PROTEIN: ATP-dependent DNA helicase 2 subunit KU70-like [Fragaria vesca subsp. vesca]	83585	DEEEDAETGFSWKTSGRDSIILLVDVTRPMFIKQESGETHFELCMKCAQSVLKNKVISSDRDLVGIVFFGTEKEKNSANFKHIYVLQELEQPCASRILELEGFLQGDSKDFDNKYGHNNSFSLSDALWACSNMFSQSPHNLGSKRVLLFTCNDNPHSNDPALQRQARTKAKDLHEVNVDIELLHLSDQGKEFKFGDFYQDIVFTADDEDDCVLPDASGKLEELMTRVRAKDNKKRTMGKIGFELGDGLQLGIAVYNLIGEQRKPYPTKLYARTNEPLKKNRKTFCEDTGELLMQTDIKKFQMYSGRKIVFEQEEVASMKKFDEPGLKLMGFKPRSALKPYLHVRPAQFIFPDELSVQGSTTLFNALLKKSLSRDVIAICRFIPRRNSAPQFVALLPQEE…	497	11	-	23	23	5	5	0.938	1.029	0.877	23	23	23	-	-	*	CL8115.Contig1_All	60.41	4e-140	gi|115618058|ref|XP_001180453.1|	PREDICTED: X-ray repair cross-complementing protein 5-like, partial [Strongylocentrotus purpuratus]	47	1e-151	sp|O93257|XRCC6_CHICK	X-ray repair cross-complementing protein 5 OS=Gallus gallus GN=XRCC6 PE=2 SV=1	66.52	1e-89	H3I6X9	H3I6X9_STRPU Uncharacterized protein OS=Strongylocentrotus purpuratus GN=SPU_009797gn PE=4 SV=1	-	-	-	-	-	-	-	K10884|1|0.0|700|spu:577594|ATP-dependent DNA helicase 2 subunit 1	GO:0050769//positive regulation of neurogenesis;GO:0006303//double-strand break repair via nonhomologous end joining;GO:0033151//V(D)J recombination;GO:0071214//cellular response to abiotic stimulus;GO:0010212//response to ionizing radiation;GO:0045893//positive regulation of transcription, DNA-dependent	GO:0016787//hydrolase activity;GO:0016829//lyase activity;GO:0003690//double-stranded DNA binding	GO:0005654//nucleoplasm;GO:0005737//cytoplasm;GO:0070419//nonhomologous end joining complex;GO:0043232//intracellular non-membrane-bounded organelle
96	CL10598.Contig2_All	187 1203 uncharacterized protein LOC100382653 [Zea mays] >Unigene15022_All 59 1075 uncharacterized protein LOC100382653 [Zea mays]	45385	GTMADSHSGTNTAEFSQQNGKESADDSAQGASSQDSTESINNGGKGRHGDKIHASKGDHDDKKIFVGGLSYGTNEEKLRNHFSKWGHVVDVEVKRGYDKRSRGFGFVLFQDAEGCAKALAAGKHELDQKTIDPKMAVAVTKPKKLFVGGISHEVTVDDIKEYFGKFGTITDSEIPVSKDEGKHKGFAFLMFEKSESVTNIVKDPYHYIKGKYRCEVKRAVSRDEHHQRILYGNTGYYSQYASGYGFQQLGTNGAASGRGRGYRGRGGFSHSYNDGGGGGYMATYPSYSYTGSFGPGGNYDYGNYSGQTSSGFYGPNYDYYGTAQYGGQGYSGGGSYSTY	667	23.9	-	33	33	7	7	1.061	0.644	0.769	27	27	27	-	*	-	CL10598.Contig2_All	44.94	3e-34	gi|348531962|ref|XP_003453476.1|	PREDICTED: heterogeneous nuclear ribonucleoprotein A/B-like [Oreochromis niloticus]	46.48	5e-07	sp|Q9SVM8|RBG2_ARATH		45.78	9e-30	E9H5U3	E9H5U3_DAPPU Putative uncharacterized protein (Fragment) OS=Daphnia pulex GN=DAPPUDRAFT_32116 PE=4 SV=1	ECU03g0730	60.1	5e-09	COG0724	RNA-binding proteins (RRM domain)	R	General function prediction only ;	K13044|1|5e-38|158|ssc:100127170|heterogeneous nuclear ribonucleoprotein A/B/D	GO:0001837//epithelial to mesenchymal transition;GO:0045892//negative regulation of transcription, DNA-dependent;GO:0045893//positive regulation of transcription, DNA-dependent	GO:0003729//mRNA binding;GO:0003688//DNA replication origin binding;GO:0005515//protein binding;GO:0003700//sequence-specific DNA binding transcription factor activity	GO:0030529//ribonucleoprotein complex;GO:0005737//cytoplasm;GO:0005634//nucleus
97	Unigene29140_All	180 1370 unnamed protein product [Blastocystis hominis]	51430	LSIVLTLMVARLTLSLDNGLARLPPMGFQAWVRFRWRTDCDLDPKNCLSEALIRTMADLVVEKGFKDVGYEYVNIDDCWMATERDPSGKLIADPIRFPNGMKSLADYVHSKGLKIGIYESMGYQTCQGFPGTFEHIDDDAKTFAEWGIDFVKMDTCHTPRGQLVSEGFKNFSRALNSTGRPIVFSCEWPHVGPHPDWDTMFNYCNTIRNGRDVQDSWDAVTSIIENFAKNQVVFKNVSGPGRYNDPDQLIIGDYALSYEQSKTQMALWAIMAAQLLMSNDLRDLPAWAEDILKNKEIIAVDQDPLGIMGQRIVNETRMQVWTKPLANGSFAAVFFCPFHGIPYDYTTTPRKLGFHTGTIYKIRELFEHKDLGTFQTDDSVTVTVNPYGSVMIRADPV	303	15.1	-	15	15	5	5	0.607	1.161	0.881	12	14	14	*	*	-	Unigene29140_All	64.06	4e-145	gi|115670835|ref|XP_786834.2|	PREDICTED: alpha-N-acetylgalactosaminidase-like [Strongylocentrotus purpuratus]	49.21	2e-110	sp|Q90744|NAGAB_CHICK	Alpha-N-acetylgalactosaminidase OS=Gallus gallus GN=NAGA PE=1 SV=1	64.06	6e-145	H3JGC3	H3JGC3_STRPU Uncharacterized protein OS=Strongylocentrotus purpuratus GN=SPU_025624gn PE=4 SV=1	-	-	-	-	-	-	-	K01204|1|6e-111|401|gga:396547|alpha-N-acetylgalactosaminidase [EC:3.2.1.49]	-	GO:0016798//hydrolase activity, acting on glycosyl bonds	-
98	Unigene15437_All	193 474 minus strand hypothetical protein CHLNCDRAFT_30526 [Chlorella variabilis]	13118	AALRRFKPLFDRILVERFTPELKTKGGLLIPEKAQAKVLDATVVAVGSGLRKEDGTFTAMTVGVGDRVLLPEYGGTKVEIEDKEFHLFREGDIL	443	48.9	-	24	24	5	5	1.193	1.214	1.2	19	18	19	*	*	*	Unigene15437_All	70.31	4e-17	gi|51869295|emb|CAE54257.1|	chaperonin [Mesobuthus gibbosus]	62.37	2e-23	sp|P61603|CH10_BOVIN	10 kDa heat shock protein, mitochondrial OS=Bos taurus GN=HSPE1 PE=3 SV=2	70.31	2e-16	Q685K0	Q685K0_9SCOR Chaperonin (Fragment) OS=Mesobuthus gibbosus GN=chap10 PE=3 SV=1	AGc1221	84.3	4e-17	COG0234	Co-chaperonin GroES (HSP10)	O	Posttranslational modification, protein turnover, chaperones ;	K04078|1|3e-32|136|nve:NEMVE_v1g178050|chaperonin GroES	GO:0009792//embryo development ending in birth or egg hatching;GO:0006457//protein folding;GO:0006950//response to stress	GO:0005524//ATP binding	GO:0005739//mitochondrion
99	CL9305.Contig1_All	2969 4279 minus strand pleckstrin homology (PH) domain-containing protein [Arabidopsis thaliana] >gi|332658453|gb|AEE83853.1| pleckstrin homology (PH) domain-containing protein [Arabidopsis thaliana]	58700	STRFKSILQNMDVKFTGLKVVAHSEAILNLTEFADNLVASLKVDKKEEETEEAETVDEGYSSEDDKKPVVPRRKRKPTEEVDIQLDAKLDEISLFVCSNTQAITDVKVTGLEAGVTVQKDKTAVSACLQAITVTDPTEGAVHPRILSTIDPEVFKMKLTLYNQATEGASYSDMEVVDIRVGLTLGCIRVVFLNKFVAAILSFVEPFSRAKAKAAEAGASAAQSAKTAAADLQSKASRVALDVTLKAPLIVVPRSSTADRGLVANLGELTVKNHFTIASGTEGKQVPAVLDNMDVCLSSIQLSRAIIEKEETTADVLLLEPMQLQAGLVRNMAPWFHGVPAIAVSGKMETIRVAISTDDFGIIMAIINENIAEGDVQKAPVEEEKVEEEAIAKPEKSPSK…	69	10.3	1	4	4	4	4	0.991	1.059	1.194	3	3	3	-	-	-	CL9305.Contig1_All	57.06	6e-93	gi|390358014|ref|XP_003729160.1|	PREDICTED: vacuolar protein sorting-associated protein 13C isoform 1 [Strongylocentrotus purpuratus]	37.5	7e-47	sp|Q8BX70|VP13C_MOUSE	Vacuolar protein sorting-associated protein 13C OS=Mus musculus GN=Vps13c PE=1 SV=2	57.06	2e-92	H3HHY3	H3HHY3_STRPU Uncharacterized protein OS=Strongylocentrotus purpuratus GN=SPU_001235gn PE=4 SV=1	-	-	-	-	-	-	-	-	-	-
100	Unigene32285_All	248 727 protocadherin-like protein [Phytophthora infestans T30-4] >gi|262098392|gb|EEY56444.1| protocadherin-like protein [Phytophthora infestans T30-4]	21297	DGVYLIQPDGYLEPFPVYCNNTVDGGNWMVIQRRMDGGVEFNRDWEDYKNGFGFPHRDLWLGNEKLAYITNQKDYEIRFDFVSKSGDPYFAKYNLFRVSDEGTLYRLVDVGDYDSTSTVGYDALPYSKGMAFTTRDRDNDLSSTYHCANHHRNGWWHKTC	135	25.6	1	9	4	5	2	1.528	4.083	0.647	4	4	4	-	*	-	Unigene32285_All	47.86	1e-23	gi|405976729|gb|EKC41225.1|	Fibrinogen-like protein A [Crassostrea gigas]	44.74	3e-13	sp|E2IYB3|FCNV1_VARKO	Veficolin-1 (Fragment) OS=Varanus komodoensis PE=2 SV=1	47.17	7e-35	C3YU50	C3YU50_BRAFL Putative uncharacterized protein (Fragment) OS=Branchiostoma floridae GN=BRAFLDRAFT_203922 PE=4 SV=1	-	-	-	-	-	-	-	K06252|1|6e-32|136|tgu:100221864|tenascin	-	-
101	Unigene29158_All	707 1267 ras [Rhodomonas sp. CCMP768]	27454	LTTYKLVVVGDGGVGKSAITIQFFQKMFYPDYDPTIEDSYIQHTEIDGEWCILDVLDTAGQEEFSAMREQYMRTGDGFLLVYSVTDRASFENMKSFHIQILRVKDKDSYPMILVANKVDLDHQRKVKLEEGADLAAEMGGIPYIETSAKDPPQNIDAAFHEVVRVIRRTPIDKKLKKKRKSQKSKKG	18	5.9	-	1	1	1	1	---	---	---	-	-	-	-	-	-	Unigene29158_All	89.53	4e-81	gi|390341315|ref|XP_784862.2|	PREDICTED: ras-related protein M-Ras-like [Strongylocentrotus purpuratus]	76.19	4e-65	sp|O14807|RASM_HUMAN	Ras-related protein M-Ras OS=Homo sapiens GN=MRAS PE=1 SV=2	89.53	1e-80	H3I533	H3I533_STRPU Uncharacterized protein OS=Strongylocentrotus purpuratus GN=SPU_009134gn PE=4 SV=1	SPAC17H9.09c	193	1e-49	COG1100	GTPase SAR1 and related small G proteins	R	General function prediction only ;	K07831|1|9e-79|292|spu:579665|Ras-related protein M-Ras	GO:0007264//small GTPase mediated signal transduction;GO:0006184//GTP catabolic process	GO:0030742//GTP-dependent protein binding;GO:0003924//GTPase activity;GO:0005525//GTP binding	GO:0016020//membrane
102	Unigene29312_All	178 1119 proline iminopeptidase putative [Albugo laibachii Nc14]	42556	LLLYAGCLMITAVLVLVIIFLFFTSPPPDMYRYLNEKSYADPNKDNAMVDFPSLYSPASIDLSIVVPAYNEEERLPKMLDECLEILESRRESNKGFTYEVIIVDDGSKDKTTQVGLKYSKKYTVEFVRVLTLTKNRGKGGAIRLGMLSARGRALLFADADGATEFKDLVKLEESLKKINQNQDSRALVCGSRAHLQDEAVAQRSSFRTILMYGFHFFVWFLCVRSIKDTQCGFKLMTRNAAAVLFSNMHVNRWAFDVELLYIAQYLGIPMDEVAVNWQEIEGSKIIPIFSWAQMGKDILFIRLRYTLGFWKIED	186	14	-	8	8	4	4	1.173	0.732	0.704	8	8	8	-	-	-	Unigene29312_All	73.08	6e-17	gi|281337265|gb|EFB12849.1|	hypothetical protein PANDA_022478 [Ailuropoda melanoleuca]	58.54	1e-100	sp|Q9Y673|ALG5_HUMAN	Dolichyl-phosphate beta-glucosyltransferase OS=Homo sapiens GN=ALG5 PE=1 SV=1	63.51	7e-106	Q0P463	Q0P463_DANRE Asparagine-linked glycosylation 5 homolog (Yeast, dolichyl-phosphate beta-glucosyltransferase) OS=Danio rerio GN=alg5 PE=2 SV=1	YPL227c	213	4e-55	COG0463	Glycosyltransferases involved in cell wall biogenesis	M	Cell wall/membrane/envelope biogenesis ;	K00729|1|2e-111|402|spu:578155|dolichyl-phosphate beta-glucosyltransferase [EC:2.4.1.117]	-	GO:0016740//transferase activity	-
103	CL560.Contig6_All	268 639 minus strand profilin [Micromonas pusilla CCMP1545] >gi|226460767|gb|EEH58061.1| profilin [Micromonas pusilla CCMP1545] >Unigene4392_All 271 642 profilin [Micromonas pusilla CCMP1545] >gi|226460767|gb|EEH58061.1| profilin [Micromonas	15809	MSWDAYITNLLATNYVTEGVILGHNGSVWAASPGLKIQPAEITALIAGFKENSPLHATGVHINGVKYFTLRANDNEVLAKKGPTGIACYKTTQAIVIGFHPESVQPGQCTTEVAKVADYLREQG	2020	46	-	47	47	4	4	1.219	0.804	0.922	43	44	44	-	-	-	CL560.Contig6_All	100	1e-67	gi|407894519|gb|AFU36096.1|	profilin [Apostichopus japonicus]	43.2	2e-25	sp|P19984|PROF2_ACACA	Profilin-2 OS=Acanthamoeba castellanii PE=1 SV=3	45.67	6e-24	B3RIX1	B3RIX1_TRIAD Profilin OS=Trichoplax adhaerens GN=TRIADDRAFT_35180 PE=3 SV=1	-	-	-	-	-	-	-	K05759|1|1e-25|114|tad:TRIADDRAFT_35180|profilin	GO:0007411//axon guidance;GO:0048133//male germ-line stem cell division;GO:0007296//vitellogenesis;GO:0008286//insulin receptor signaling pathway;GO:0008154//actin polymerization or depolymerization;GO:0008355//olfactory learning;GO:0035159//regulation of tube length, open tracheal system;GO:0040018//positive regulation of multicellular organism growth;GO:0007568//aging;GO:0035193//larval central…	GO:0003785//actin monomer binding;GO:0005159//insulin-like growth factor receptor binding	GO:0015629//actin cytoskeleton
104	Unigene13550_All	134 1243 predicted protein [Hordeum vulgare subsp. vulgare]	46905	MREVISLHVGQAGVQIGNSCWELFCLEHGIQPDGQMPSDKTVGSGEDDFNTFFSETGGGKHVPRSIFVDLEPTVIDEVRLGAYRQLYHPEQLISGKEDAANNYARGHYTIGKEAIDEVLDRTRKLADQCTGLQGFLVFHSFGGGTGSGFTSLLLERLSLDYGKKPKLEFAVYPAPRVSTAVVEPYNAVLTTHTTLEHSDCAFMVDNEAIFEICQKNLDIERPSFPNLNRIIAQVVSSITASLRFDGAINVDLTEFQTNLVPYPRIHFPLVTYAPIISAEKAYHEQMTVSEITNSCFEPANQMVKCDPRHGKYMACCLLFRGDVVPKDVNAAIASIKTKRSIQFVDWCPTGFKIGINYQPPTVVPGGDLAK	2209	40.5	-	92	67	11	9	1.241	1.413	1.202	53	53	53	-	*	-	Unigene13550_All	92.5	3e-15	gi|397511428|ref|XP_003826076.1|	PREDICTED: tubulin alpha-1C chain-like [Pan paniscus]	88.68	1e-84	sp|P24635|TBA_OCTVU	Tubulin alpha chain (Fragment) OS=Octopus vulgaris PE=2 SV=1	89.19	0	Q9YHW1	Q9YHW1_9PERC Alpha tubulin OS=Notothenia coriiceps GN=GTbalphaA PE=2 SV=1	SPBC800.05c	573	2e-163	COG5023	Tubulin	Z	Cytoskeleton ;	K07374|1|0.0|686|dpe:Dper_GL12416|tubulin alpha	GO:0055085//transmembrane transport;GO:0006200//ATP catabolic process;GO:0051258//protein polymerization;GO:0006184//GTP catabolic process;GO:0007018//microtubule-based movement	GO:0042626//ATPase activity, coupled to transmembrane movement of substances;GO:0005524//ATP binding;GO:0003924//GTPase activity;GO:0005198//structural molecule activity;GO:0005525//GTP binding	GO:0016021//integral to membrane;GO:0005874//microtubule;GO:0005737//cytoplasm
105	CL7786.Contig1_All	143 480 LEN=480; minus strand; translated	13974	MDRSAPSTQRATDFYRLFRSGNHLEMISNLITLANNEDVDKHDLAFLMVILRTITDCHLRRVVLHDQRCLNALTLFLDNVQQNEASRDSKPFPQDVADIEEILRAPPLSPDIP	94	15	1	3	3	1	1	2.436	1.574	1.602	3	3	3	-	-	-	CL7786.Contig1_All	-	-	-	-	-	-	-	-	-	-	-	-	-	-	-	-	-	-	-	-	-	-
106	Unigene22564_All	218 1126 hypothetical protein PHYSODRAFT_317226 [Phytophthora sojae]	39997	RHFLTLKDFSSEEVKSLLWVAADLKYRFKVRNERYTPLAGRSAGLIFEKRSTRTRVSTETGVALLGGHPCFLSPSDIHLGVNESSKDTAKVLSGFVDIVLARVYRHNDLEVLASEGSIPVVNGLSELYHPLQALADFLTLREHYKSLKGLTLAWVGDGNNIIHSLMMTAPKLGVHIRCATPKGYECDPTVYSDAVDLAEQHGTTLYCTTDPMDACKDADVLVTDTWISMGQEEEKNERLRAFQGYQITKKMAAVASPDWCFLHCLPRKPEEVDDEVFYSRQSLVWQEAENRKWTVMAVMLCLL	32	3.3	-	1	1	1	1	---	---	---	1	1	1	-	-	-	Unigene22564_All	78.57	7e-19	gi|470619883|ref|XP_004318292.1|	PREDICTED: LOW QUALITY PROTEIN: ornithine carbamoyltransferase, mitochondrial [Tursiops truncatus]	67	1e-122	sp|Q9N1U7|OTC_BOVIN	Ornithine carbamoyltransferase, mitochondrial OS=Bos taurus GN=OTC PE=2 SV=1	72.94	3e-131	C3Z6N9	C3Z6N9_BRAFL Putative uncharacterized protein OS=Branchiostoma floridae GN=BRAFLDRAFT_287613 PE=3 SV=1	SPAC4G9.10	315	7e-86	COG0078	Ornithine carbamoyltransferase	E	Amino acid transport and metabolism ;	K00611|1|1e-132|473|bfo:BRAFLDRAFT_287613|ornithine carbamoyltransferase [EC:2.1.3.3]	GO:0006526//arginine biosynthetic process;GO:0000050//urea cycle	GO:0004585//ornithine carbamoyltransferase activity;GO:0016597//amino acid binding	GO:0005743//mitochondrial inner membrane;GO:0005759//mitochondrial matrix
107	Unigene15498_All	170 1513 hypothetical protein GUITHDRAFT_165762 [Guillardia theta CCMP2712]	64015	KTETVESFSLEVVKIIKDSQQRHGLRHKDYQRYRSYCTRRLQRIRKSLKFIQRNRNKFVKKAVTDEALTDARYLYIPLVSAERAWSYAMQLKLEANSERRKMFHVITRMKKALKHAEELEALCASSKCDARSKLESQAYHLWMKGTLYFETENWEDCMEAFNNASNIYEKLASAVTEDQKGLYLERVNDIVPNLRYCAFQTGDESAIQDLRELRGKVGGDTNIDFLLAQTRDKQAVTLSEVCWRGRSVPVTNERVRAFLLSNKESEQELATATDNEAKISIYDTSLMECKDALQVLRDELKSDPNRKQRGQQSGEPISTPQFLHSYLTYIRLTNTVQRNVLLVLSLKERLPITDTEPKLDPGQRRTKPQDLIRMYDTIIQSLGEIPHLPGVEDDVDLHQ…	51	4.9	-	2	2	2	2	1.062	0.755	1.147	2	2	2	-	-	-	Unigene15498_All	60.54	1e-161	gi|390341339|ref|XP_003725432.1|	PREDICTED: signal recognition particle 68 kDa protein [Strongylocentrotus purpuratus]	50.11	2e-123	sp|Q9UHB9|SRP68_HUMAN	Signal recognition particle 68 kDa protein OS=Homo sapiens GN=SRP68 PE=1 SV=2	60.54	5e-161	H3JCR4	H3JCR4_STRPU Uncharacterized protein OS=Strongylocentrotus purpuratus GN=SPU_024348gn PE=4 SV=1	-	-	-	-	-	-	-	K03107|1|1e-123|443|ssc:100520094|signal recognition particle subunit SRP68	GO:0006412//translation;GO:0042493//response to drug;GO:0006614//SRP-dependent cotranslational protein targeting to membrane	GO:0005047//signal recognition particle binding	GO:0005829//cytosol;GO:0005786//signal recognition particle, endoplasmic reticulum targeting;GO:0005840//ribosome;GO:0005730//nucleolus;GO:0005783//endoplasmic reticulum
108	Unigene29531_All	140 613 minus strand PREDICTED: protein MOTHER of FT and TF 1-like [Cucumis sativus] >gi|449488407|ref|XP_004158023.1| PREDICTED: protein MOTHER of FT and TF 1-like [Cucumis sativus]	21628	VVPDVLSAVPPGVAEVKWPSGAKAELGNVTTPTLMKDVPDIKWAAESGALYTVILTDPDAPSRKDPKYREWHHWLVVDIPGGDVSKGKTQSAYIGAGPPQGTGLHRYVFIVYKQPGPLNIQEPPKPKTTENRASWKASKFAEDHKLGSPVAANFVQAE	595	48.1	-	23	23	5	5	0.506	1.024	0.874	19	19	18	*	-	*	Unigene29531_All	63.27	5e-50	gi|158299558|ref|XP_319656.4|	AGAP008909-PA [Anopheles gambiae str. PEST] >gi|157013575|gb|EAA14862.4| AGAP008909-PA [Anopheles gambiae str. PEST]	59.63	8e-50	sp|O16264|PEBPH_CAEEL	Phosphatidylethanolamine-binding protein homolog F40A3.3 OS=Caenorhabditis elegans GN=F40A3.3 PE=2 SV=1	63.27	2e-49	Q7PWN1	Q7PWN1_ANOGA AGAP008909-PA OS=Anopheles gambiae GN=AGAP008909 PE=4 SV=4	YLR179c	72.8	2e-13	COG1881	Phospholipid-binding protein	R	General function prediction only ;	K14802|1|5e-14|77.0|dan:Dana_GF11187|phospholipid-transporting ATPase [EC:3.6.3.1]	-	-
109	Unigene22537_All	87 1079 hypothetical protein PRUPE_ppa004628mg [Prunus persica]	44503	SSEYTRELNKGNVETTLASNDIVFVNFYANWCRFSQMLKPIFEEAAQVVQQEFITEGQVVLAAVDCDREPEVSQKYHISKYPTLKLFRNGRLAKREYRGQRSKDAFVQFIREQLVDPVVQLPNPAEIPKLNDKKRSIIGFFRDTTSNEYSVFKRVAGALRDDCAFHAGIGDNFRNELTTGESIMFRPSKTSGDEDMLFMGTLGNFELLHTWSLDKCVPLVREITFENGEELTEEGIPFLILFHHPDDVDTVRQYNEIISRELMQEKGNVNFLTADGTKFTHPLHHLNKSPKDLPLIAIDSFRHMYLFPDMSKLTEPRRLLQFVQDLHNGKL	451	26.3	-	20	20	7	7	0.913	1.02	1.088	17	17	17	-	-	-	Unigene22537_All	65.86	2e-131	gi|115872185|ref|XP_791945.2|	PREDICTED: endoplasmic reticulum resident protein 44-like [Strongylocentrotus purpuratus]	53.7	2e-102	sp|Q9BS26|ERP44_HUMAN	Endoplasmic reticulum resident protein 44 OS=Homo sapiens GN=ERP44 PE=1 SV=1	65.86	8e-131	H3IWV8	H3IWV8_STRPU Uncharacterized protein OS=Strongylocentrotus purpuratus GN=SPU_018702gn PE=4 SV=1	SPAC1F5.02	102	1e-21	COG0526	Thiol-disulfide isomerase and thioredoxins	OC	Posttranslational modification, protein turnover, chaperones ; Energy production and conversion ;	K08056|1|5e-25|115|dre:378851|protein disulfide isomerase family A, member 3 [EC:5.3.4.1]!K09580|3|2e-23|110|aga:AgaP_AGAP012407|protein disulfide-isomerase A1 [EC:5.3.4.1]	-	GO:0003756//protein disulfide isomerase activity	-
110	Unigene8113_All	399 2417 unnamed protein product [Blastocystis hominis]	91808	HYLSQAGWAGGLICLLQTSPEAPLIFSLVLKLFKAESTEDLQKKALEKVAGLSAEEFQAFLMYCSAFLSNFGNYKSFGDTKFVPDISQEKLEGIVMCSKAHSVDPSGVDELWNLVKVQIFSLDAKVQQLGLAEKGLTTYFSSNCTEADAEIAKTFMNEKKIQAYNTRLFKTAENGKTTYEIRLASSELGDAQKDLNLGKHEHDNVTFVVSRGDYAPLMAQVVDNLKKAKEFAANTNEEKMLEGYINSFSSGSVEEHMEGSRYWIRDTGPIVEGYIGFIESYRDPFGVRGEWEGFVAIVNKEMSAKFGSLVENAESFLPLLPWPKEYEKDTFLRPDFTSLEVLSFASSGIPAGINIPNYDAIRQNEGFKNVSLGNVLAGHSTDQVVTFLEKSDMELYTKM…	625	12.2	-	27	27	7	7	0.716	1.139	0.986	26	26	26	*	-	-	Unigene8113_All	69.78	8e-132	gi|327289992|ref|XP_003229708.1|	PREDICTED: dipeptidyl peptidase 3-like [Anolis carolinensis]	60.82	0	sp|A7RZW4|DPP3_NEMVE	Dipeptidyl peptidase 3 OS=Nematostella vectensis GN=dpp3 PE=3 SV=1	73.2	2e-126	H3I843	H3I843_STRPU Uncharacterized protein (Fragment) OS=Strongylocentrotus purpuratus GN=SPU_010215gn PE=4 SV=1	-	-	-	-	-	-	-	K01277|1|0.0|981|spu:582874|dipeptidyl-peptidase III [EC:3.4.14.4]	-	-
111	Unigene25855_All	258 1403 predicted protein [Physcomitrella patens subsp. patens] >gi|162663824|gb|EDQ50568.1| predicted protein [Physcomitrella patens subsp. patens]	53391	IVMVGLPARGKTYIAQKLSRYLNWVGISTKVFNVGEYRRQVVGGSSPHDFFRHDNEKALEIRRKCAKMAMEDMVKWLAGEGEVGVFDATNTTRERREWIVSFCQEHCFNVFFVESMCSDPDVIQCNIKEVKLSSPDYYKTAQEDAIKDFLLRIQHYEDNYETIDEELDKHLSFIKIMNVNSKFLVNNITGHLQSRVVYYLMNIHIMPRTIYLTRHGESELNLIGRIGGNASLSPAGKKYASALAEYMSKQNLVDLKVWTSRLNRTIETAEKIDAPIEQWKALDELDAGVCDSMTYQEIQEKHPEEFALRDQDKFHYRYPMGESYEDLVARLEPVTMELERQRNVVVICHQGVMRCLLAYFLDKKSEELPYLKCPLHTVIKLK	89	13.6	-	8	8	5	5	0.931	1.354	1.361	6	6	6	-	-	*	Unigene25855_All	78.33	8e-22	gi|432089729|gb|ELK23546.1|	6-phosphofructo-2-kinase/fructose-2,6-biphosphatase 3 [Myotis davidii]	64.92	1e-150	sp|P70266|F261_MOUSE	6-phosphofructo-2-kinase/fructose-2,6-bisphosphatase 1 OS=Mus musculus GN=Pfkfb1 PE=2 SV=2	68.96	1e-161	H3HLX0	H3HLX0_STRPU Uncharacterized protein OS=Strongylocentrotus purpuratus GN=SPU_002649gn PE=4 SV=1	SPAC732.02c_2	208	1e-53	COG0406	Fructose-2,6-bisphosphatase	G	Carbohydrate transport and metabolism ;	K01103|1|1e-168|592|spu:759612|6-phosphofructo-2-kinase / fructose-2,6-bisphosphatase [EC:2.7.1.105 3.1.3.46]	GO:0046835//carbohydrate phosphorylation;GO:0033133//positive regulation of glucokinase activity;GO:0006096//glycolysis;GO:0006094//gluconeogenesis;GO:0006003//fructose 2,6-bisphosphate metabolic process;GO:0044281//small molecule metabolic process;GO:0006000//fructose metabolic process	GO:0003873//6-phosphofructo-2-kinase activity;GO:0019900//kinase binding;GO:0004331//fructose-2,6-bisphosphate 2-phosphatase activity;GO:0070095//fructose-6-phosphate binding;GO:0042802//identical protein binding;GO:0005524//ATP binding	GO:0043540//6-phosphofructo-2-kinase/fructose-2,6-biphosphatase 1 complex
112	CL10111.Contig1_All	261 908 LEN=4291; minus strand; translated	29821	MADHVRRLSTEKNVAQVHSFHSFIRSTDADDKSKVATLYDDWTSYDEDVQKVAYKGPSESGVMVSQYCKDKSISILDCGSGTGLVGEVLYPHGFKNVTALDISQKSLDIAKAKGVYSRLICTQAGKHQMPFEENEFDALVCVGCFIPGHMNQEVFPDWLRVVKPGGYIFLIMRTSYLQEGEFKGQFDQAIQTHVDAKRWVKVEARVIPEYFDMFEG	244	28.2	-	11	11	5	5	0.679	0.752	2.259	9	9	9	*	-	*	CL10111.Contig1_All	41.67	3e-12	gi|390341844|ref|XP_003725542.1|	PREDICTED: Williams-Beuren syndrome chromosomal region 27 protein-like [Strongylocentrotus purpuratus]	30.98	3e-15	sp|Q8N6F8|WBS27_HUMAN	Williams-Beuren syndrome chromosomal region 27 protein OS=Homo sapiens GN=WBSCR27 PE=2 SV=2	41.01	1e-29	C3YJJ2	C3YJJ2_BRAFL Putative uncharacterized protein OS=Branchiostoma floridae GN=BRAFLDRAFT_93226 PE=4 SV=1	SPAC25B8.10	51.6	9e-07	COG0500	SAM-dependent methyltransferases	QR	Secondary metabolites biosynthesis, transport and catabolism ; General function prediction only ;	-	-	-
113	Unigene34097_All	5 649 minus strand hypothetical protein MTR_027s0011 [Medicago truncatula] >gi|355502031|gb|AES83234.1| hypothetical protein MTR_027s0011 [Medicago truncatula]	33032	EQNNQSDSASEWSENEKKLKELMAETVLLREKEERTLEELSQLTNSKRELEDVIEKSKISFAELEEKFTASQTELEAVKALAEEQRRAEEKLRSSEAEKVGELEAKIENLKKDLESHVEEKVKIQVEFAEERIAKEKLEQEIATSKTQMESMELNVQKLQGDAETWKKALESQRTEMEEKLTELMAEIQAQKDEDRNREEEMEKLRGELAGYREE	17	5.6	-	2	2	1	1	---	---	---	-	-	-	-	-	-	Unigene34097_All	-	-	-	-	-	-	-	-	-	-	-	-	-	-	-	-	-	-	-	-	-	-
114	Unigene4648_All	298 1248 minus strand DNA replication factor C complex subunit 5 [Coccomyxa subellipsoidea C-169]	42524	PWVEKYRPQNLSDLISHKEIISTIQKFIEEDRLPHLLFYGPPGTGKTSTILACAKQLYSPKEFNSMVLELNASDDRGIDVVRGAVLSFASTRTIFRSGFKLVILDEADAMTNDAQNALRRVVEKFTENTRFCFICNYLSKIIPALQSRCTRFRFGPLALEQMMPRVQHVIEQEKVEVTEDGMQALVTLAKGDMRKALNILQSTYMGFELVNEENVYQCVGHPLRKDIENIVNWMLNENFTTAYNNTHKLKTVKGLALQDVVTEVHTYVHRIEFPKNVRIHLLEKMADIEHRIAAGTSEKIQLGSLVAAFQIARDMVM	50	3.8	-	1	1	1	1	---	---	---	1	1	1	-	-	-	Unigene4648_All	79.31	1e-79	gi|449672093|ref|XP_002154784.2|	PREDICTED: replication factor C subunit 5-like [Hydra magnipapillata]	76.03	1e-151	sp|Q9D0F6|RFC5_MOUSE	Replication factor C subunit 5 OS=Mus musculus GN=Rfc5 PE=2 SV=1	77.78	8e-129	Q32PI3	Q32PI3_BOVIN Replication factor C (Activator 1) 5, 36.5kDa OS=Bos taurus GN=RFC5 PE=2 SV=1	YNL290w	328	9e-90	COG0470	ATPase involved in DNA replication	L	Replication, recombination and repair ;	K10756|1|4e-152|537|ecb:100054946|replication factor C subunit 3/5	GO:0000084//S phase of mitotic cell cycle;GO:0000075//cell cycle checkpoint;GO:0006283//transcription-coupled nucleotide-excision repair;GO:0006297//nucleotide-excision repair, DNA gap filling;GO:0006271//DNA strand elongation involved in DNA replication;GO:0032201//telomere maintenance via semi-conservative replication;GO:0000722//telomere maintenance via recombination	GO:0017111//nucleoside-triphosphatase activity;GO:0019899//enzyme binding;GO:0003677//DNA binding;GO:0005524//ATP binding	GO:0005654//nucleoplasm;GO:0005663//DNA replication factor C complex
115	Unigene16507_All	544 1695 hypothetical protein MTR_027s0011 [Medicago truncatula] >gi|355502031|gb|AES83234.1| hypothetical protein MTR_027s0011 [Medicago truncatula]	48923	EQTRYFEELQNIPEEPEEETSDTQEESSSVVRSETVRTVVTTKQVISSGGIVDEHTEVKVFKDEELIDKTEDFGEPSGETLQGDNFEEEVTPKHDDDASPIMQVEEQFKMSEMPSDETHPEADEAIQSKEVERMEESVPVEEEIEIEMEAVEENIKTEMTPDEEIDVFAQDDTSKDYETIPSSSDHYTQKTEVRVHTEITTSGGTLVHEERKVVEDGEVKVDFKMDTLKADDGASQELLQDEEKQEAQPVGQGEVLSGPEWNVDDEEDNMEDEEDVSSEEGEYMPEIRVDPTSEYVQPKDDTEIDEDGLMVEPDPFTEESDVSMDEREEFAEEEEQRPDGVHVTSKISVTSTQIADGTIVSHTETTRTLHTEQQITSGEQPTDD	97	7.3	-	5	5	2	2	0.546	1.294	1.209	5	5	5	*	-	-	Unigene16507_All	-	-	-	-	-	-	-	-	-	-	-	-	-	-	-	-	-	-	-	-	-	-
116	CL2731.Contig1_All	393 1370 conserved unknown protein [Ectocarpus siliculosus]	45007	NSFEAAYTLKDELGRGATSVVKKCVQVGTERPYAVKVIKKNVDQKVVRSEVQILLRLNHPNVIKLHEIFESQTELFLVLELVTGGELFDRIVAKGSYTERDAASVVRQICDAVAFLHDNDIVHRDLKPENLLYANMDEDAPLKLADFGLSKICSQDVNMKTVCGTPGYCAPEVLYGKNYGPEVDMWSIGVITYILLCGFEPFYDERGDSHVYRKIMRADYEFISPWWDPVSLSARDFINKLLIVSPKKRLTAKQALEHPWVRAEFSGANVSQMLHTQEKIKEFNARRKLKAAGKAVIAMNRLGEWVTPVRPRKPPSTPEQPAGIEG	235	21.8	-	18	18	5	5	0.788	1.137	0.63	17	17	17	*	-	-	CL2731.Contig1_All	70.09	6e-89	gi|345798699|ref|XP_003434483.1|	PREDICTED: calcium/calmodulin-dependent protein kinase type IV [Canis lupus familiaris]	67.47	1e-117	sp|P13234|KCC4_RAT	Calcium/calmodulin-dependent protein kinase type IV OS=Rattus norvegicus GN=Camk4 PE=1 SV=3	71.3	9e-94	H3JCW1	H3JCW1_STRPU Uncharacterized protein OS=Strongylocentrotus purpuratus GN=SPU_024395gn PE=4 SV=1	SPAC14C4.03	161	1e-39	COG0515	Serine/threonine protein kinase	RTKL	General function prediction only ; Signal transduction mechanisms ; Transcription ; Replication, recombination and repair ;	K05869|1|9e-122|436|mdo:100015956|calcium/calmodulin-dependent protein kinase IV [EC:2.7.11.17]	GO:0007270//neuron-neuron synaptic transmission;GO:0002372//myeloid dendritic cell cytokine production;GO:0007616//long-term memory;GO:0046827//positive regulation of protein export from nucleus;GO:0006468//protein phosphorylation;GO:0007165//signal transduction;GO:0006954//inflammatory response;GO:0045893//positive regulation of transcription, DNA-dependent;GO:0043011//myeloid dendritic cell dif…	GO:0004683//calmodulin-dependent protein kinase activity;GO:0005516//calmodulin binding;GO:0005524//ATP binding	GO:0005654//nucleoplasm;GO:0005829//cytosol
117	Unigene18162_All	1 230 LEN=230; translated	10110	XIGQLERDQADEASLRKMLNDALTSLLNLLDWVSQAERSLGNEQPESEELKQLERQVADHKTLHDDVLAHQQPIMESX	67	16.7	-	2	2	1	1	0.518	1.094	0.939	2	2	2	-	-	-	Unigene18162_All	67.44	1e-09	gi|390356404|ref|XP_003728775.1|	PREDICTED: uncharacterized protein LOC582631 [Strongylocentrotus purpuratus]	-	-	-	-	67.44	7e-09	H3HNL7	H3HNL7_STRPU Uncharacterized protein OS=Strongylocentrotus purpuratus GN=SPU_003261gn PE=4 SV=1	-	-	-	-	-	-	-	-	-	-
118	CL3502.Contig2_All	784 2778 predicted protein [Hordeum vulgare subsp. vulgare]	80987	DYEVNYTRNPFQIKITRPSSGGVLFDTGIGGFIFEEQFIQFSTLLQTTAIFGFGEHRHKRLRHEVLEWPTWGMWNNDADPDDSQSNLHGQHPFYIGIEPSGDAHGVYFANSNAQEVSIIPMPALTWRTVGGIVNLYFYSGPSPEDVVAQHTEVVGRPAIPPYWALGLHLGREDFNDVATMQAMVDRNEEAGIPFDVLYSGVEITDSYRMFTYDETNFDGLPEFTQMLNDTGRKFIITMTPGIPKHVPEPKTYYTPYYYLEKYGLLVNISNSTQRPVTAQQWAGEVVFPDYTNPLTRDWLGSYLNELHDQFPFHGIIITDNEPTNYVNGSKMGCQNKKLNFPPYVPHLQSRMLYQNTICMESKYSVGEHYDVHSLFGLYSAEAFYMAATQVFHDKRTLLL…	539	13.7	-	34	34	8	8	1.088	1.207	1.68	25	25	25	-	*	-	CL3502.Contig2_All	47.86	2e-58	gi|395739082|ref|XP_003777205.1|	PREDICTED: maltase-glucoamylase, intestinal-like, partial [Pongo abelii]	43.16	1e-149	sp|O43451|MGA_HUMAN	Maltase-glucoamylase, intestinal OS=Homo sapiens GN=MGAM PE=1 SV=5	45.39	9e-32	H2PNR4	H2PNR4_PONAB Uncharacterized protein OS=Pongo abelii GN=LOC100454684 PE=4 SV=1	alr5331	238	2e-62	COG1501	Alpha-glucosidases, family 31 of glycosyl hydrolases	G	Carbohydrate transport and metabolism ;	K12047|1|1e-149|530|hsa:8972|maltase-glucoamylase [EC:3.2.1.20 3.2.1.3]	GO:0005975//carbohydrate metabolic process	GO:0016160//amylase activity;GO:0004558//alpha-glucosidase activity	GO:0005886//plasma membrane
119	CL1195.Contig2_All	100 1974 hypothetical protein PHYSODRAFT_361636 [Phytophthora sojae]	78343	MGGTDSKLNFRKAVVQLTTKTQPVEAGDDAFWDQFWADTVTNVSDVFALIPAAEIRALREESPSNLATLCYKAVEKLVSAAETGCTAPKEQQIVLNSVRLLTRVLPYIFEDADWRGFFWSTLPGQTANLESLDEFPEEESLPLAQSLLNALADLLFCPDFSVVASKKQHAAEKPDDPQSIDSCEYIWEAGVGFAISPPHNAQLDQNRTELLKLLLTCFSETMYLPPVSDAHSIPNQWITYLCSSDNRHALPLFTSLLNIACAYDPVGYGMPYNHLLFNDTREPLVEVAAQILVVTLDHTQSSPNASTSIDGIEDSGEHGLTDNLFVNYLSRIHREEDFRFILKGITRLLNNPLIQTYLPGSTKKIAFHQELLVLFWKMCDHNKKFLFYVLKSSDVLDVL…	29	1.1	-	1	1	1	1	---	---	---	1	1	1	-	-	-	CL1195.Contig2_All	89.08	3e-109	gi|224165678|ref|XP_002188322.1|	PREDICTED: protein HID1-like, partial [Taeniopygia guttata]	73.93	0	sp|Q8IV36|HID1_HUMAN	Protein hid-1 homolog OS=Homo sapiens GN=C17orf28 PE=1 SV=1	86.72	5e-62	H3I1R2	H3I1R2_STRPU Uncharacterized protein OS=Strongylocentrotus purpuratus GN=SPU_007934gn PE=4 SV=1	-	-	-	-	-	-	-	-	-	-	GO:0000139//Golgi membrane;GO:0005886//plasma membrane
120	Unigene27095_All	6 1589 minus strand PREDICTED: myosin-J heavy chain-like [Glycine max]	74537	NFHIFYYMFAGLTDELKEDLGLASPEKYRYLGNGPCKIKTDPKGLLSSYNELINALDLVGFLEEEQEDMFRILAGVLTIGQVEVDTNEKEEAFVRDEDVLKRVADILGLQEHQLKNMLTFATSRASGEFFTRNYSKEQAHNVRDALAKALYGRLFSWIVNKVNQLLAPEEDLSSSSITEIGILDIFGFENLGMNSFEQVCINLANEQLQNFFNQHIFTLEQAEYQLEGVDWTRVPFVNNQPLLELFMAKPISVLALLDEESLFPKGSDHSYVEKMNHNFNKSHHYIKTKVSTSNKFSIDHYAGRVEYDATGFLEKNRDALPLGATQLFKTSNVELISLIFTGTITRTGTLALQNRISQKKRSRKSIKKGRHNPNQNKKLTVGAQFKNSLLVLMELLNQS…	46	2.5	-	1	1	1	1	---	---	---	1	1	1	-	-	-	Unigene27095_All	64.66	4e-148	gi|390365617|ref|XP_782580.3|	PREDICTED: myosin-IIIb-like [Strongylocentrotus purpuratus]	40.61	2e-110	sp|Q8WXR4|MYO3B_HUMAN	Myosin-IIIb OS=Homo sapiens GN=MYO3B PE=2 SV=4	64.58	3e-135	H3HJ25	H3HJ25_STRPU Uncharacterized protein OS=Strongylocentrotus purpuratus GN=SPU_001634gn PE=4 SV=1	YAL029c	308	2e-83	COG5022	Myosin heavy chain	Z	Cytoskeleton ;	K08834|1|8e-112|404|mdo:100024555|myosin III [EC:2.7.11.1]	-	GO:0005488//binding	-
121	Unigene15456_All	186 1043 hypothetical protein MICPUN_107230 [Micromonas sp. RCC299] >gi|226521270|gb|ACO67257.1| hypothetical protein MICPUN_107230 [Micromonas sp. RCC299]	35578	MGQTLSEPVTTKETQGCENHLVKVGSSCMQGWRINMEDAHTHILGLANEEDSAFFAVYDGHGGAKVAQYAGEHLHKTIIDQMAYKRGDLTTAMRDAFLMIDNNMQNDESLKDELAGTTAIVVIMREGKLHTANVGDSRGIVSVSGHARALSQDHKPCLEEESNRIVAAGGWVEFNRVNGNLALSRALGDFIFKRNESKRPEEQIVTALPDITVTEITPETEFLVLACDGIWDVLTNQEVVDFIRPRIAQKMDPEQICEELMTRCLAPDCQMGGLGCDNMTVVLVSL	52	2.8	-	5	5	1	1	1.483	0.818	1.226	5	5	5	*	-	-	Unigene15456_All	75.17	2e-132	gi|115752494|ref|XP_782003.2|	PREDICTED: probable protein phosphatase 2C T23F11.1-like [Strongylocentrotus purpuratus]	63.99	2e-111	sp|P49596|PP2C2_CAEEL	Probable protein phosphatase 2C T23F11.1 OS=Caenorhabditis elegans GN=T23F11.1 PE=2 SV=2	75.17	8e-132	H3IBB5	H3IBB5_STRPU Uncharacterized protein OS=Strongylocentrotus purpuratus GN=SPU_011351gn PE=3 SV=1	SPAC2G11.07c	290	2e-78	COG0631	Serine/threonine protein phosphatase	T	Signal transduction mechanisms ;	K14803|1|3e-133|474|spu:576623|protein phosphatase 2C homolog 2/3 [EC:3.1.3.16]	GO:0006470//protein dephosphorylation	GO:0046872//metal ion binding;GO:0004722//protein serine/threonine phosphatase activity	GO:0008287//protein serine/threonine phosphatase complex
122	Unigene569_All	471 1283 hypothetical protein SELMODRAFT_170980 [Selaginella moellendorffii] >gi|300162225|gb|EFJ28838.1| hypothetical protein SELMODRAFT_170980 [Selaginella moellendorffii]	41726	DLDDDLDNFSKLKKKKKKKKARFDMDGLMETLPDNEGTTEETTQETNESTIAPPAEDDDDEDTDIFSKKKKKKKKKRVTIEDALSNGQSEEQKEEGEDIDARIKAAIPWAGSERDYTYDELLTRVFDIMKAKNPDMVGDKKRFVMKPPQVVRVGTKKSSFVNFSDICRMLHRQPEHLLAFLLAELGTSGSIDGQNMLIIKGRFQQKQIENVLRRYIKEYVTCHTCRSSETILHKENRLFFLQCESCQSRCSVASIKSGFQAVTSKRATMRA	28	2.2	-	1	1	1	1	---	---	---	1	1	1	-	-	-	Unigene569_All	87.8	1e-83	gi|291243459|ref|XP_002741618.1|	PREDICTED: eukaryotic translation initiation factor 2, subunit 2 (beta)-like [Saccoglossus kowalevskii]	82.32	7e-81	sp|Q99L45|IF2B_MOUSE	Eukaryotic translation initiation factor 2 subunit 2 OS=Mus musculus GN=Eif2s2 PE=1 SV=1	84.73	2e-62	Q2I191	Q2I191_ICTPU Eukaryotic translation initiation factor 2 beta (Fragment) OS=Ictalurus punctatus PE=2 SV=1	SPAC6B12.17c	205	7e-53	COG1601	Translation initiation factor 2, beta subunit (eIF-2beta)/eIF-5 N-terminal domain	J	Translation, ribosomal structure and biogenesis ;	K03238|1|2e-81|302|gga:395295|translation initiation factor 2 subunit 2	GO:0006413//translational initiation;GO:0055085//transmembrane transport;GO:0006814//sodium ion transport	GO:0003743//translation initiation factor activity;GO:0015293//symporter activity	GO:0016021//integral to membrane
123	Unigene22058_All	132 1133 predicted protein [Physcomitrella patens subsp. patens] >gi|162664515|gb|EDQ51232.1| predicted protein [Physcomitrella patens subsp. patens]	47813	DTEDDESEILEESPCGRWQKRRVKVEQRDVPGIDVAYLAMDTEEGREVVWNEVQFSARRDYKAQEEKIAVVFDNLIQLDHPNIVKFYKYWADTKSEKPRVIFITEYMSSGSLKQFLKRVKKDMHQIQEKSWKRWTTQILSALSYLHSCEIPIVHGNLTTDTIFIQHNGLIKIGCVAPDAINNHVKTFREEQKNMHYLAPEYSVNQEKVTIGVDIYAFGICALEMAVVDIQGNGETKKKCISREAVLQAVEGLKDDSQRDFIRKCLSDQTKRPTARDLLLQPVLFEVHSLKLLAAHCIVDTESVAAEFESEVKALTKDQLGERVIASISHKDGRK	34	3.3	-	1	1	1	1	---	---	---	1	1	1	-	-	-	Unigene22058_All	84.62	4e-27	gi|148705407|gb|EDL37354.1|	nuclear receptor binding protein, isoform CRA_a [Mus musculus]	66.15	4e-123	sp|Q99J45|NRBP_MOUSE	Nuclear receptor-binding protein OS=Mus musculus GN=Nrbp1 PE=1 SV=1	79.17	8e-27	E1U0R4	E1U0R4_ZONAL Nuclear receptor binding protein 1, 5 prime (Fragment) OS=Zonotrichia albicollis GN=NRBP1 PE=4 SV=1	BS_yloP_1	57.8	3e-08	COG0515	Serine/threonine protein kinase	RTKL	General function prediction only ; Signal transduction mechanisms ; Transcription ; Replication, recombination and repair ;	K08875|1|4e-123|441|rno:619579|nuclear receptor-binding protein	GO:0007254//JNK cascade;GO:0006468//protein phosphorylation;GO:0006367//transcription initiation from RNA polymerase II promoter;GO:0006888//ER to Golgi vesicle-mediated transport	GO:0004674//protein serine/threonine kinase activity;GO:0005524//ATP binding;GO:0042803//protein homodimerization activity	GO:0042995//cell projection;GO:0012505//endomembrane system;GO:0048471//perinuclear region of cytoplasm;GO:0005654//nucleoplasm
124	Unigene6351_All	158 964 minus strand ---	35665	MCAIVSLLALLLSSVAIGRSSASKFTVNPGTLKQEDDDYVWTFAAGHSWHGFEYRDESTGELRGFTVDLINAVCQEANKKCEIIRDLYINCWDAKAGGPAHGGTGLMGGWYDGCSAWSQTRQRLNTFKFSKPYVQQLAEKITFYTADADSDLDWRDLTNRTVAFLDGWPASEDCILLYDEINGFDKSNARHYPSIEEFIVGIQQKEVDCGFAALSEKLQKELHHLTTDELDFKCTLSAPSIMMRKDSQLDTWWNEAFDRIRANGKYSEV	68	18.6	-	4	4	4	4	0.549	0.916	---	3	3	1	*	-	-	Unigene6351_All	40.68	8e-46	gi|390360929|ref|XP_800144.2|	PREDICTED: uncharacterized protein LOC581669 [Strongylocentrotus purpuratus]	-	-	-	-	56.96	1e-20	H3I8S5	H3I8S5_STRPU Uncharacterized protein OS=Strongylocentrotus purpuratus GN=SPU_010450gn PE=4 SV=1	AF0231	56.2	5e-08	COG0834	ABC-type amino acid transport/signal transduction systems, periplasmic component/domain	ET	Amino acid transport and metabolism ; Signal transduction mechanisms ;	-	-	-
125	Unigene25636_All	265 2106 SM/Sec1-family protein [Physcomitrella patens subsp. patens] >gi|162691620|gb|EDQ77981.1| SM/Sec1-family protein [Physcomitrella patens subsp. patens]	83565	HLSGGRVNLALWRNKARSDLLRCLRDCPGSKALVWDHQLTGPVGLIAEYSLLRENEVDRMFPLNPGRLPIATGAGASAIQSVIFLVRPKLELIEVVADCIRKTEEVGSRFHREYNIYFVPMKSTLCCQKLKDLQVYGFFKNVGEYCLELLPLDSDLLSMESEVSFKECYLLNDFTTMHYVARALMKMQAMYGIIPKVYGKGKCAKTVADMITRMRREIGDGQFRSEPCFDSMLLLDRTCDLLTPLPTQLTYEGLIDEFFDLQNGTAKFPPEKFSKGKDSEEQQQQKDLSTEKKSDHKKIPLNSSDELFAVLRDKNFNAVGPELSKKAKTLSAIYDERKDARTVRAMKQFVSKLPHIQLEKSQLATHTSIAELIKEQTDTDVFMDSLQVQQEFMNGIDTD…	94	7.8	-	5	5	4	4	1.14	1.214	0.954	5	5	5	-	-	-	Unigene25636_All	64.24	4e-106	gi|390346773|ref|XP_797117.3|	PREDICTED: vacuolar protein sorting-associated protein 33A-like [Strongylocentrotus purpuratus]	57.63	0	sp|Q9D2N9|VP33A_MOUSE	Vacuolar protein sorting-associated protein 33A OS=Mus musculus GN=Vps33a PE=1 SV=2	63.67	0	H3IKK6	H3IKK6_STRPU Uncharacterized protein OS=Strongylocentrotus purpuratus GN=SPU_014654gn PE=4 SV=1	SPBC1703.15c	258	2e-68	COG5158	Proteins involved in synaptic transmission and general secretion, Sec1 family	U	Intracellular trafficking, secretion, and vesicular transport ;	K15292|1|5e-08|60.1|hmg:100206664|syntaxin-binding protein 1!K15301|4|4e-07|57.0|dre:406780|syntaxin-binding protein 3	GO:0032418//lysosome localization;GO:0016192//vesicle-mediated transport;GO:0030220//platelet formation;GO:0048070//regulation of developmental pigmentation;GO:0032400//melanosome localization	GO:0032403//protein complex binding	GO:0030897//HOPS complex;GO:0031410//cytoplasmic vesicle;GO:0005770//late endosome;GO:0005769//early endosome;GO:0048471//perinuclear region of cytoplasm
126	Unigene25808_All	75 1160 minus strand vacuolar protein sorting 11 protein [Arabidopsis thaliana] >gi|16930681|gb|AAL32006.1|AF436824_1 At2g05170/F5G3.7 [Arabidopsis thaliana] >gi|4755188|gb|AAD29055.1| expressed protein [Arabidopsis thaliana] >gi|27363390|gb|AAO	47874	QWRRFTFFDKETVKRLGSDEDFTGLKDVDITACTSGHGNIVFGDTEGAIHMLNRDLDLVSFRAYELRVSHLYQLKQHNIIVSVGNDESGTNPIIKVWHLDKLDKSGNPTATRLTRALPGNGRPSPVTAMTVSENLNLMAIGFLDGSVTIYRGDVTKDRHSKPQPLFQEKSMVTGLAFRHSQYGTTLFVSTETSVISTTVTSKGCNKVILDGHGCSLGCSVLSDSSQDQQFVIGRSDALYFYQSDQRGSCLIFEGNKNRLQWFRNYLMVVTKDNKAIPRGIGGDGGGKVMDMVTVYDVTNKFIAYSAPVPEVISVIVEWGSLYILGGDRKLYLLREKDTQTKLETLFKKNLYVMAINLAKSQH	41	4.7	-	3	3	2	2	---	---	---	1	1	1	-	-	-	Unigene25808_All	82.14	2e-19	gi|390343382|ref|XP_798781.3|	PREDICTED: vacuolar protein sorting-associated protein 11 homolog, partial [Strongylocentrotus purpuratus]	52.12	4e-103	sp|Q91W86|VPS11_MOUSE	Vacuolar protein sorting-associated protein 11 homolog OS=Mus musculus GN=Vps11 PE=1 SV=3	62.66	2e-54	H3HK77	H3HK77_STRPU Uncharacterized protein OS=Strongylocentrotus purpuratus GN=SPU_002043gn PE=4 SV=1	-	-	-	-	-	-	-	-	GO:0006810//transport;GO:0030318//melanocyte differentiation;GO:0003407//neural retina development;GO:0001889//liver development;GO:0048794//swim bladder development;GO:0003406//retinal pigment epithelium development	GO:0005515//protein binding	GO:0031410//cytoplasmic vesicle;GO:0005769//early endosome;GO:0005884//actin filament;GO:0005773//vacuole;GO:0016020//membrane
127	CL973.Contig1_All	3 302 PREDICTED: DEAD-box ATP-dependent RNA helicase 40-like [Fragaria vesca subsp. vesca]	15300	NHNILQIVDVCDELAKDEKLVKLLEEIMQEKENKSLIFTETKKKSDELVKWLRRDGWPAMCIHGDKAQRERDWVLSEFKHGRSPILVATDVASRGLGLSN	139	9	2	8	8	1	1	1.366	0.684	0.905	8	8	8	-	*	-	CL973.Contig1_All	76.04	1e-40	gi|5059030|gb|AAD38876.1|AF110008_1	p68 RNA helicase [Molgula occulta]	70	1e-40	sp|A5A6J2|DDX5_PANTR	Probable ATP-dependent RNA helicase DDX5 OS=Pan troglodytes GN=DDX5 PE=2 SV=1	76.04	4e-40	Q9Y1M2	Q9Y1M2_9ASCI P68 RNA helicase OS=Molgula occulta GN=bobcat PE=3 SV=1	ECU08g1080	84	6e-17	COG0513	Superfamily II DNA and RNA helicases	LKJ	Replication, recombination and repair ; Transcription ; Translation, ribosomal structure and biogenesis ;	K12823|1|2e-41|167|mdo:100029630|ATP-dependent RNA helicase DDX5/DBP2 [EC:3.6.4.13]	GO:0000122//negative regulation of transcription from RNA polymerase II promoter;GO:0043517//positive regulation of DNA damage response, signal transduction by p53 class mediator;GO:0045667//regulation of osteoblast differentiation;GO:0000381//regulation of alternative mRNA splicing, via spliceosome;GO:0072332//intrinsic apoptotic signaling pathway by p53 class mediator;GO:0060765//regulation of …	GO:0003724//RNA helicase activity;GO:0008026//ATP-dependent helicase activity;GO:0003713//transcription coactivator activity;GO:0030331//estrogen receptor binding;GO:0003723//RNA binding;GO:0005524//ATP binding;GO:0050681//androgen receptor binding	GO:0005730//nucleolus;GO:0005681//spliceosomal complex
128	Unigene45078_All	1 579 methylcrotonoyl-CoA carboxylase beta chain, mitochondrial precursor [Phytophthora infestans T30-4] >gi|262096305|gb|EEY54357.1| methylcrotonoyl-CoA carboxylase beta chain, mitochondrial precursor [Phytophthora infestans T30-4]	22961	DPGTEEDFLEIAPFAGLGMEYGDVPAAGIVSIIGRIHNKWCLVGNNDATVKGGTSFPITVEKQIRTQDIALQNCLPVIYGVDSGGAFLPLQASIFPDRKHGGRVFYNEAILSSLGIPQIAIVCGSCTAGGAYVPTMAEETVIIDKTGTIFLGGPPLVFAATGEKISSENLGGATLHCKVSGCTDYFARTEDEA	27	9.8	-	1	1	1	1	---	---	---	1	1	1	-	-	-	Unigene45078_All	72.34	5e-13	gi|313244387|emb|CBY15185.1|	unnamed protein product [Oikopleura dioica]	62.77	1e-56	sp|Q8T2J9|MCCB_DICDI	Methylcrotonoyl-CoA carboxylase beta chain, mitochondrial OS=Dictyostelium discoideum GN=mccb PE=3 SV=2	69.73	6e-72	H2ZDB3	H2ZDB3_CIOSA Uncharacterized protein (Fragment) OS=Ciona savignyi PE=4 SV=1	Rv2502c	237	1e-62	COG4799	Acetyl-CoA carboxylase, carboxyltransferase component (subunits alpha and beta)	I	Lipid transport and metabolism ;	K01969|1|1e-73|275|acs:100555942|3-methylcrotonyl-CoA carboxylase beta subunit [EC:6.4.1.4]	-	-
129	Unigene32477_All	3220 4395 minus strand hypothetical protein GUITHDRAFT_139499 [Guillardia theta CCMP2712]	51845	EIGGFPAPTVSWSKAGQPFEPSDRVQMVSLPNAATMLISRCQPDDSSEYTITVANKHGEESATVRVKVIDKPGTPENLKVSGYSETTVSLQWDPPAYDGNVGVSHYVVEFRENKKGQEWQEANSSVRKPEFTVPNLTEGKDYFFRVSAVNQVGSSEPTETPKPTTAKEPSEPPDSTKAPVVVDAAEGSITIEWEPPTFDGGRPISGYLIEKRETSSPRWSKATKQPVKGTDFTADDLIPGAEYEFRVSAINKAGTGQPSEPSKATLARVPIDPADAPVQPEVSEVTKSGCLLQWGKPSKDGGSPIKGYQVQKKNPDTGDWEKVNRIPIKDTQFKVPLTEGEEVELRVVAENEAGLSEPSESTPMFVAKDPEIPPTIELTCQEEISIKSGAQM	125	18.4	-	8	8	5	5	0.885	0.477	0.643	7	7	7	-	*	*	Unigene32477_All	54.76	4e-109	gi|390345740|ref|XP_001186987.2|	PREDICTED: twitchin-like [Strongylocentrotus purpuratus]	43.56	5e-11	sp|Q23551|UNC22_CAEEL	Twitchin OS=Caenorhabditis elegans GN=unc-22 PE=1 SV=3	55.09	2e-62	H3IIH9	H3IIH9_STRPU Uncharacterized protein OS=Strongylocentrotus purpuratus GN=SPU_013917gn PE=4 SV=1	-	-	-	-	-	-	-	K12567|1|6e-68|258|aml:100476638|titin [EC:2.7.11.1]	GO:0048739//cardiac muscle fiber development;GO:0045859//regulation of protein kinase activity;GO:0048769//sarcomerogenesis;GO:0055003//cardiac myofibril assembly;GO:0007076//mitotic chromosome condensation;GO:0051592//response to calcium ion;GO:0045214//sarcomere organization;GO:0006936//muscle contraction;GO:0030240//skeletal muscle thin filament assembly;GO:0055008//cardiac muscle tissue morph…	GO:0043621//protein self-association;GO:0005509//calcium ion binding;GO:0008307//structural constituent of muscle;GO:0004674//protein serine/threonine kinase activity;GO:0042802//identical protein binding;GO:0002020//protease binding;GO:0051371//muscle alpha-actinin binding;GO:0051015//actin filament binding;GO:0005516//calmodulin binding	GO:0005865//striated muscle thin filament;GO:0031430//M band;GO:0000794//condensed nuclear chromosome;GO:0030018//Z disc
130	Unigene21922_All	352 1197 minus strand SET domain-containing protein, partial [Coccomyxa subellipsoidea C-169]	38285	LSRFTKWCEDNNFQLNAKVVVTEDGSCAHYGMIANEDIPKGETLFEIPRDCLLHPETSSIKEFFSKYKEHLDSASGWVPLLVCLMYEHTNSNSRWKAYLDLFPNFSEQELPMFWDKQELSELQGTGVPEAVSRDLKNIQDEFQSVVLPCISQHPELFNLEVHNLDLYKKMVAFVMSYSFTEPSNRLPIDMDADEDDEDDDDDNDSHHPPPVMVPLADALNHIAKNNAKLLFEKDRLKMVSIKPIRKGQEVFNTFGELANWQLLHMYGFAESYPENIFDTVDI	20	4.3	-	1	1	1	1	---	---	---	-	-	-	-	-	-	Unigene21922_All	71.11	4e-13	gi|53132675|emb|CAG31926.1|	hypothetical protein RCJMB04_13m6 [Gallus gallus]	51.59	5e-78	sp|Q803K4|SETD6_DANRE	N-lysine methyltransferase setd6 OS=Danio rerio GN=setd6 PE=2 SV=1	71.11	1e-12	F1P3Z2	F1P3Z2_CHICK N-lysine methyltransferase SETD6 OS=Gallus gallus GN=SETD6 PE=4 SV=1	-	-	-	-	-	-	-	K05302|1|5e-85|314|spu:582478|SET domain-containing protein 6	GO:0050789//regulation of biological process;GO:0044238//primary metabolic process;GO:0044260//cellular macromolecule metabolic process;GO:0032259//methylation	GO:0008168//methyltransferase activity	-
131	CL12796.Contig3_All	52 306 hypothetical protein CHLREDRAFT_112949 [Chlamydomonas reinhardtii] >gi|158281256|gb|EDP07011.1| predicted protein, partial [Chlamydomonas reinhardtii]	13692	SFSELAKTMDYGQKRSFGDFQCGNCKKSWKSAYSWPGKYQECKKCHAKAYPRNLRPLQRSGLDGNPNAPHPQELCQKCKELGTSC	230	43.5	-	8	8	3	3	8.97	0.574	2.401	5	5	7	*	-	-	CL12796.Contig3_All	50	2e-12	gi|48134336|ref|XP_396730.1|	PREDICTED: zinc finger CCHC domain-containing protein 24-like [Apis mellifera]	48.68	4e-13	sp|Q8N2G6|ZCH24_HUMAN	Zinc finger CCHC domain-containing protein 24 OS=Homo sapiens GN=ZCCHC24 PE=1 SV=1	50	8e-12	H9KNZ0	H9KNZ0_APIME Uncharacterized protein OS=Apis mellifera GN=LOC413285 PE=4 SV=1	-	-	-	-	-	-	-	-	-	-
132	CL6072.Contig1_All	277 2094 predicted protein [Hordeum vulgare subsp. vulgare]	78380	KDQDEKYGYVHAVSGPVVTAENMAGAAMYELVRVGHVLLVGEIIRLEGDMATLQVYEETSGVSVGDPVLRTGKPLSVELGPGILGNIFDGIQRPLQDIRAMTSSIYIPRGINLKALDRTKKWDFKPYPGIRVGSHITGGDFYGLVQENSLIEHRLMLPPKSRGTVTWIAHAGHYDNTDIVLETEFDGEKTKHTMVQVWPVRQMRPTPEKLPSNYPLLTGQRVLDALFPCVQGGTTAIPGAFGCGKTVISQSLSKYSNSDVIVYVGCGERGNEMSEVLRDFPELTVEIGGKTESIMKRTALVANTSNMPVAAREASIYTGITLSEYFRDMGYNVSMMADSTSRWAEALREISGRLAEMPADSGYPAYLGARLASFYERAGRVKCLGNPSREGSVSLVGAV…	591	22.3	1	27	27	10	10	0.847	1.16	1.094	21	22	21	*	-	-	CL6072.Contig1_All	95.28	2e-116	gi|161898392|gb|ABX80240.1|	V-type ATPase A subunit isoform 2 [Tetraodon nigroviridis]	84.98	0	sp|P31404|VATA_BOVIN	V-type proton ATPase catalytic subunit A OS=Bos taurus GN=ATP6V1A PE=2 SV=2	87.33	0	D7NY33	D7NY33_SCOKU Lysosomal H+-transporting ATPase V1 subunit A (Fragment) OS=Scotophilus kuhlii GN=ATP6V1A PE=2 SV=1	SPAC343.05	850	0	COG1155	Archaeal/vacuolar-type H+-ATPase subunit A	C	Energy production and conversion ;	K02145|1|0.0|1096|bfo:BRAFLDRAFT_202247|V-type H+-transporting ATPase subunit A [EC:3.6.3.14]	GO:0033572//transferrin transport;GO:0090382//phagosome maturation;GO:0008286//insulin receptor signaling pathway;GO:0006879//cellular iron ion homeostasis;GO:0015991//ATP hydrolysis coupled proton transport;GO:0051701//interaction with host;GO:0042777//plasma membrane ATP synthesis coupled proton transport	GO:0046961//proton-transporting ATPase activity, rotational mechanism;GO:0046933//proton-transporting ATP synthase activity, rotational mechanism;GO:0005524//ATP binding	GO:0033180//proton-transporting V-type ATPase, V1 domain;GO:0005902//microvillus;GO:0005829//cytosol;GO:0005887//integral to plasma membrane;GO:0016324//apical plasma membrane;GO:0005739//mitochondrion
133	CL4227.Contig2_All	1 627 LEN=850; translated	29292	VGLLNYVLPSKKFRTLWFTNCTLPASIRPEKIPEELKRQNVQVLWPSNACHLDLQSGKWKKADDVQTITELCSQAVTISSKDSVSVQRSAIELLLKASSHNIPIYGVNLVWSFSKIDEDGNIILSSGLSLPIITSIENMNIQTEKGREMNKHEVNGILNYVQHSQRFKQLDFDYCLLPSSIPVGPSLSTLKSRGVKVFWKPDARKSHER	46	3.8	-	2	2	1	1	1.058	2.053	1.84	2	2	2	-	-	-	CL4227.Contig2_All	-	-	-	-	-	-	-	-	-	-	-	-	-	-	-	-	-	-	-	-	-	-
134	Unigene18812_All	360 932 minus strand hypothetical protein GUITHDRAFT_159784 [Guillardia theta CCMP2712]	25632	FKLVLLGESAVGKSSLVLRFVKGQFHEFQESTIGAAFLTQTVVLDDTTLKFEIWDTAGQERYHSLAPMYYRGSQAAVVVYDITNQDTFARAKTWVRELEKAGSPNLVIALAGNKADMANRRMVEAEEAKAYAEEKSILFMETSAKTAMNVNDLFLAIAKRLPRNEKQPSGEGGSGHTLVDPAQDEKKSGSC	1040	40.8	-	41	41	6	6	0.871	0.925	1.05	38	38	38	*	-	-	Unigene18812_All	86.99	3e-53	gi|148692651|gb|EDL24598.1|	RAB5B, member RAS oncogene family, isoform CRA_b [Mus musculus]	82.63	2e-67	sp|Q58DS9|RAB5C_BOVIN	Ras-related protein Rab-5C OS=Bos taurus GN=RAB5C PE=2 SV=1	84.91	1e-63	A1XKR9	A1XKR9_SUBDO Rab5 (Fragment) OS=Suberites domuncula PE=3 SV=1	SPAC18G6.03	164	1e-40	COG1100	GTPase SAR1 and related small G proteins	R	General function prediction only ;	K07889|1|1e-71|269|tca:100141572|Ras-related protein Rab-5C!K07888|2|2e-71|268|acs:100563281|Ras-related protein Rab-5B	GO:0007264//small GTPase mediated signal transduction;GO:0006184//GTP catabolic process;GO:0030100//regulation of endocytosis;GO:0007032//endosome organization;GO:0015031//protein transport	GO:0030742//GTP-dependent protein binding;GO:0003924//GTPase activity;GO:0005525//GTP binding	GO:0031901//early endosome membrane;GO:0030139//endocytic vesicle;GO:0042470//melanosome;GO:0005886//plasma membrane
135	CL2717.Contig2_All	149 3814 coatomer protein complex [Micromonas sp. RCC299] >gi|226517158|gb|ACO63152.1| coatomer protein complex [Micromonas sp. RCC299]	162953	MLTKFETKSARVKGLSFHKNRPWILASLHSGVIQLWDYRMCTLLDKFDEHDGPVRGICFHDQQPLFVSGGDDYKIKLWNYKLKRCLFTLLGHLDYIRTTFFHHEYPWILSASDDQTIRIWNWQSRNCICVLSGHNHYVMCANFHPSDDMVVSASLDQTVRVWDISGLRKKNVQPGPSGLDDHLKNTMTPELFGTADATVKHQLEGHDRGVNWAAFHPTMPLIVSAADDRYVKLWRMNDAKAWEVDTCRGHYNNVSCAIFHPRQELLISNSEDKSVRVWDMSKRMCLHTFRRDHDRFWVMTAHPSLNLFAAGHDSGMIVFKLERERPAFAVHGNLLYYVKERYMRKLDFTTSKDVPIMQLRSNVKAPVYSMGYNPAENAVLLCTRTSNIDNSNYDLYPVP…	646	11.4	-	26	26	10	10	1.113	0.996	0.985	21	21	23	-	-	-	CL2717.Contig2_All	93.44	2e-65	gi|152012613|gb|AAI50356.1|	Copa protein [Danio rerio]	77.12	0	sp|Q27954|COPA_BOVIN	Coatomer subunit alpha OS=Bos taurus GN=COPA PE=1 SV=1	90.36	2e-89	H3CG64	H3CG64_TETNG Uncharacterized protein OS=Tetraodon nigroviridis GN=COPA PE=4 SV=1	ECU01g1290	297	8e-80	COG2319	FOG: WD40 repeat	R	General function prediction only ;	K05236|1|0.0|2092|spu:592176|coatomer protein complex, subunit alpha (xenin)	GO:0030157//pancreatic juice secretion;GO:0006890//retrograde vesicle-mediated transport, Golgi to ER;GO:0006891//intra-Golgi vesicle-mediated transport;GO:0048205//COPI coating of Golgi vesicle;GO:0006886//intracellular protein transport	GO:0005198//structural molecule activity;GO:0005179//hormone activity	GO:0030126//COPI vesicle coat;GO:0005829//cytosol;GO:0005615//extracellular space
136	Unigene118_All	264 1559 minus strand hypothetical protein AURANDRAFT_22237 [Aureococcus anophagefferens]	54821	ATSVTQGSQPNIVILFADDFGYGDLPSYGHPTSEAPSLEKLIENGLRFTDFYSANPVCTPSRAALLTGRQPPRTGMYPGVLYPQSSGGMPLEEVTIAEILKPLNYRTAIVGKWHLGVGKNNTFMPTNQGFDYYYGIPYTHDMCPCVTCFYPNDTCYYNCNTKVVSCPLFENEKIVQQPTDFVTLADDLVIKAKTFIADSVTKKQPFFLYYAFHHTHNPQFAGKKFRNSTIRGSFGDSLAEMDWNIGEVMSQLKESGVEENTFVFFTSDNGPCLIFPFRQGSSGLLKCGKGTTYEGGQRVPGIAYWPGRIQPGVTREIASTLDLLPTIANITNAKLPSVPLDGVDMSPILFGTGKGNTETFFYYPSFSLPYIGVFAVRYKQYKAHYLTAGNSNSGNKNHD…	47	4.6	-	1	1	1	1	---	---	---	1	1	1	-	-	-	Unigene118_All	63.92	1e-162	gi|291238687|ref|XP_002739253.1|	PREDICTED: arylsulfatase A-like [Saccoglossus kowalevskii]	53.32	2e-129	sp|P15289|ARSA_HUMAN	Arylsulfatase A OS=Homo sapiens GN=ARSA PE=1 SV=3	64.29	5e-16	H2P4X6	H2P4X6_PONAB Uncharacterized protein OS=Pongo abelii GN=ARSA PE=4 SV=1	SMa1683	214	2e-55	COG3119	Arylsulfatase A and related enzymes	P	Inorganic ion transport and metabolism ;	K01134|1|9e-160|563|spu:592372|arylsulfatase A [EC:3.1.6.8]	GO:0010033//response to organic substance;GO:0007339//binding of sperm to zona pellucida;GO:0044248//cellular catabolic process	GO:0008484//sulfuric ester hydrolase activity;GO:0046872//metal ion binding	GO:0043231//intracellular membrane-bounded organelle;GO:0016021//integral to membrane;GO:0005886//plasma membrane;GO:0044444//cytoplasmic part
137	CL6441.Contig1_All	1 739 LEN=739; translated	32034	XSTVLFFVGLLVRVSIAVTSSSLEGADPSMASVVVKEGESAEISCTMKESNVAYFWKKGGSLENSTDVASFIEGITTNNPDQPYTATENGTLIIKKVSLNDEGKYICRVTSEEISCHGEVIVFVQAALQDFQLTIEYCEPENSCVISTESTKPTSLTCKATNASPSMKLKWFNGSHEIKHNIQENSLTKGPSREISSTIRDVYKGPSPLTCQAVDFKTSNDDGMFAHVQFRTPASSTDISPGWMVTA	43	5.7	-	1	1	1	1	---	---	---	1	1	1	-	-	-	CL6441.Contig1_All	34.44	3e-07	gi|390362318|ref|XP_003730127.1|	PREDICTED: uncharacterized protein LOC100889455 [Strongylocentrotus purpuratus]	31.25	1e-06	sp|O75871|CEAM4_HUMAN	Carcinoembryonic antigen-related cell adhesion molecule 4 OS=Homo sapiens GN=CEACAM4 PE=1 SV=2	34.78	2e-06	H3IP12	H3IP12_STRPU Uncharacterized protein OS=Strongylocentrotus purpuratus GN=SPU_015897gn PE=4 SV=1	-	-	-	-	-	-	-	K06499|1|1e-06|53.5|hsa:1089|carcinoembryonic antigen-related cell adhesion molecule	-	-
138	Unigene8011_All	241 636 minus strand conserved hypothetical protein [Albugo laibachii Nc14]	19826	LPLEDVKLKSVEDDGVMKNAWKIISTTKSFMVSAATATEKSEWMAHIDKSIQDLLDKSGKKPATDLSPVWVPDSEAPVCMRCNKNKFTTINRRHHCRKCGYVVCSGCSTKRYLLPQIASRPIRVCDNCLDTL	38	6.1	-	4	4	1	1	0.893	1.373	1.234	3	3	3	*	*	-	Unigene8011_All	69.7	9e-49	gi|390362682|ref|XP_783303.3|	PREDICTED: pleckstrin homology domain-containing family F member 2-like [Strongylocentrotus purpuratus]	62.12	1e-46	sp|Q91WB4|PKHF2_MOUSE	Pleckstrin homology domain-containing family F member 2 OS=Mus musculus GN=Plekhf2 PE=1 SV=1	74.03	9e-25	H3IB27	H3IB27_STRPU Uncharacterized protein OS=Strongylocentrotus purpuratus GN=SPU_011262gn PE=4 SV=1	-	-	-	-	-	-	-	K05724|1|2e-21|100|ecb:100065128|FYVE, RhoGEF and PH domain containing 5/6	-	GO:0046872//metal ion binding;GO:0005543//phospholipid binding	GO:0030133//transport vesicle
139	Unigene8289_All	536 3868 LEN=4405; minus strand; translated	134166	EEMIFDVEFDFMIGQIGCDRVNYFCVEFKKGSNANPDFEIPSTLGDNTIRKCEERSCPFPDEAGTTARLTNIGFSVQPGSGDAPHGHADMGVTATVSTSLNSDRIEGRGLWRLGIFGSRSQDGSGERLHEMRNILSDDVAAMPLIPGQELVLPGNAIINLQGIGTGQDFSYFCMEFAKGDHADPDFDMPMQGGSIVSCSSLAGTPVHDGRPRVMMTGFRSSYELGRKYQDGTTSVTVEATVTPHQQSDPLQGQRLWKLGVYGSSNEEGTGRRQTVSPQLLRPPDTDVPLSPGGDLDFVVTDNLDLRAVGPDTNFPYLCVEFGKDANASPDYELELGGPETIVTCHLLYGTGNTDPHEIGGTDPDRERPDHGHHGGSNPGHHGGNSRPRALVSGFGYEIG…	1124	20	-	60	60	13	13	1.501	0.634	1.094	54	54	54	*	*	*	Unigene8289_All	32.2	6e-06	gi|390335549|ref|XP_787359.3|	PREDICTED: uncharacterized protein LOC582310 [Strongylocentrotus purpuratus]	-	-	-	-	31.5	1e-12	H3HTZ7	H3HTZ7_STRPU Uncharacterized protein OS=Strongylocentrotus purpuratus GN=SPU_005166gn PE=4 SV=1	-	-	-	-	-	-	-	-	-	-
140	Unigene3103_All	317 1045 LEN=1045; minus strand; translated	31677	MAETDNNSQIQFDIGYDIEHYQRGYALIFNNELFGKGSRRIGTNVDRDGLETTFRRLGFGVKVYENYSTQKIRDTLIEESNKDHSLKACFLCVFLTHGDDGIIYGSDGDPESFKGNGNVHSTNRTWLRLNDDVFDIFRGNNCSTLIGKPKIFIIQACRGTLNDTPVQVGGGAQANYVNQEEGVKVTIPTEADFLICYSSTEGFVSYRDHEKGTWFIQELTRVLNEFGESKDFIQILTVVNKLV	62	4.5	-	6	6	1	1	0.336	0.448	1.515	5	5	5	*	*	*	Unigene3103_All	39.32	1e-34	gi|432950947|ref|XP_004084686.1|	PREDICTED: caspase-6-like [Oryzias latipes]	38.36	2e-33	sp|P55214|CASP7_MESAU	Caspase-7 OS=Mesocricetus auratus GN=CASP7 PE=1 SV=1	39.3	6e-35	G1P111	G1P111_MYOLU Uncharacterized protein (Fragment) OS=Myotis lucifugus GN=CASP7 PE=3 SV=1	-	-	-	-	-	-	-	K04396|1|2e-38|159|spu:584221|caspase 6 [EC:3.4.22.59]	-	-
141	CL11164.Contig3_All	207 986 minus strand uncharacterized protein LOC100279871 [Zea mays]	33459	GDRIEKDGFGDITVPAGKYYGANTARSLINFDIGGEKETMPLPMIRAFGILKRCAAEVNKGYGLDEEKANSIIAAADQVIDGTLDDNFPLVVWQTGSGTQTNMNVNEVIGNKAIELMGGVIGSKRPVHPNDDVNKGQSSNDTFPTAMHIAVATEVHKCLLPGLQQLCDALATKQEEFKDIIKIARTHTQDAVPMTLGQEFSGYKTQIENGIKRVERCLPSVYALAAGGTAVGTGLNTRKGFAEKIAASIAAFTDLPFITA	321	24.2	-	19	1	5	1	---	---	---	1	1	1	-	-	-	CL11164.Contig3_All	75.58	4e-23	gi|390345059|ref|XP_786111.3|	PREDICTED: fumarate hydratase class II-like [Strongylocentrotus purpuratus]	70.54	3e-97	sp|Q7SX99|FUMH_DANRE	Fumarate hydratase, mitochondrial OS=Danio rerio GN=fh PE=2 SV=1	73.64	2e-102	H3JI16	H3JI16_STRPU Uncharacterized protein OS=Strongylocentrotus purpuratus GN=SPU_026226gn PE=3 SV=1	CC2109	312	3e-85	COG0114	Fumarase	C	Energy production and conversion ;	K01679|1|2e-97|355|xtr:100491219|fumarate hydratase, class II [EC:4.2.1.2]	GO:0044237//cellular metabolic process	GO:0016829//lyase activity	GO:0044444//cytoplasmic part
142	Unigene26073_All	183 998 minus strand hypothetical protein SELMODRAFT_428295 [Selaginella moellendorffii] >gi|300142544|gb|EFJ09244.1| hypothetical protein SELMODRAFT_428295 [Selaginella moellendorffii]	35806	LTEEQQQLRQAVFRFVQDELAPKAAEIDATDEFTERRDLWKKMGDLGLHGITVPEEDGGTGGGYLDHCIVMEEVSRASGAIALAYGAHSNLCINQISRNGTAEQKAKYLPKLISGEHIGALAMSETNSGSDVVSMKCKAELKGDYYVLNGSKFWITNGPDADVLVVYAKTDPKAKAQHAISTFLIEKGMEGFTTAQKLNKLGMRGSSTCELVFEDCKVPVSNVMGGLNAGVYVLMSGLDLERLVLSAGPIGLMQAACDVAFPYLHERKAFGK	97	12.5	-	6	6	3	3	1.247	1.173	1.07	6	6	6	*	*	-	Unigene26073_All	74.73	1e-115	gi|209571446|ref|NP_001129356.1|	isovaleryl coenzyme A dehydrogenase [Bombyx mori] >gi|208609173|dbj|BAG72196.1| isovaleryl coenzyme A dehydrogenase [Bombyx mori] >gi|209172195|dbj|BAG74561.1| isovaleryl Coenzyme A dehydrogenase [Bombyx mori]	68.13	6e-110	sp|Q5RBD5|IVD_PONAB	Isovaleryl-CoA dehydrogenase, mitochondrial OS=Pongo abelii GN=IVD PE=2 SV=1	74.73	5e-115	B5UB85	B5UB85_BOMMO Isovaleryl Coenzyme A dehydrogenase OS=Bombyx mori GN=ivd PE=2 SV=1	BMEI1923	363	1e-100	COG1960	Acyl-CoA dehydrogenases	I	Lipid transport and metabolism ;	K00253|1|1e-118|426|phu:Phum_PHUM601240|isovaleryl-CoA dehydrogenase [EC:1.3.8.4]	GO:0006508//proteolysis;GO:0055114//oxidation-reduction process	GO:0050660//flavin adenine dinucleotide binding;GO:0008470//isovaleryl-CoA dehydrogenase activity;GO:0004252//serine-type endopeptidase activity	-
143	Unigene27132_All	1 399 LEN=399; translated	18745	XALMLASRNGHHEMVKYLLHFGANAKLVNKSGQTALQIAEFWSHTECCKSLQQNDDDMTKSQAPEVVNFFGHGLLDRQALRRGDKSWLDSTMKEPSTKYILLSKQNVYAIPPSADNRKYTLCSYSYTQVNQLMX	75	26.9	-	2	2	2	2	0.915	0.959	1.387	2	2	2	-	-	-	Unigene27132_All	44.27	1e-24	gi|390335338|ref|XP_003724122.1|	PREDICTED: peroxisomal NADH pyrophosphatase NUDT12-like [Strongylocentrotus purpuratus]	38.53	5e-14	sp|Q4R7L8|NUD12_MACFA	Peroxisomal NADH pyrophosphatase NUDT12 OS=Macaca fascicularis GN=NUDT12 PE=2 SV=1	44.76	4e-15	H2TQM3	H2TQM3_TAKRU Uncharacterized protein OS=Takifugu rubripes GN=NUDT12 PE=4 SV=1	-	-	-	-	-	-	-	K03426|1|4e-16|83.2|tgu:100225025|NAD+ diphosphatase [EC:3.6.1.22]	-	-
144	Unigene5587_All	77 418 minus strand PREDICTED: 60S ribosomal protein L34-like [Glycine max] >gi|356499803|ref|XP_003518726.1| PREDICTED: 60S ribosomal protein L34-like [Glycine max]	18573	MVQRMTYRRRHPYKTRSNKVRIVRTPGGRLVYHYLKKRVSPPKCGDTGVRLRGVIAARPKKLMRIPRYKKKVTRAYGGCLSASAVRKRIVRAFLIEEQKIVHRVLKAQQAGKKK	65	7	-	3	3	1	1	0.734	1.108	1.212	3	3	3	-	-	-	Unigene5587_All	74.34	2e-41	gi|72104110|ref|XP_797232.1|	PREDICTED: 60S ribosomal protein L34-B-like [Strongylocentrotus purpuratus]	61.74	2e-28	sp|P49207|RL34_HUMAN	60S ribosomal protein L34 OS=Homo sapiens GN=RPL34 PE=1 SV=3	74.34	1e-40	H3J5X2	H3J5X2_STRPU Uncharacterized protein OS=Strongylocentrotus purpuratus GN=SPU_021924gn PE=3 SV=1	SPCC1322.15	131	3e-31	COG2174	Ribosomal protein L34E	J	Translation, ribosomal structure and biogenesis ;	K02915|1|2e-42|170|spu:592626|large subunit ribosomal protein L34e	GO:0006412//translation	GO:0003735//structural constituent of ribosome	GO:0005840//ribosome
145	Unigene7591_All	301 567 minus strand hypothetical protein SELMODRAFT_75211 [Selaginella moellendorffii] >gi|300171497|gb|EFJ38097.1| hypothetical protein SELMODRAFT_75211 [Selaginella moellendorffii]	12789	GGAELLFDKVKEHEVKLSHDNNPWTIRKLLVWIKENLLKERPELFVQEDTVRPGILILVNDADWELVGELEYEIQNKDRIVFISTLHGG	26	6.7	-	1	1	1	1	---	---	---	1	1	1	-	-	-	Unigene7591_All	75	4e-23	gi|432957112|ref|XP_004085792.1|	PREDICTED: ubiquitin-related modifier 1 homolog [Oryzias latipes]	71.91	5e-33	sp|A9YUB5|URM1_CAPHI	Ubiquitin-related modifier 1 homolog OS=Capra hircus GN=URM1 PE=3 SV=1	74.16	9e-30	E9HTI9	E9HTI9_DAPPU Putative uncharacterized protein OS=Daphnia pulex GN=DAPPUDRAFT_304164 PE=4 SV=1	YIL008w	72.4	2e-13	COG5131	Ubiquitin-like protein	O	Posttranslational modification, protein turnover, chaperones ;	K12161|1|1e-34|144|xtr:100379922|ubiquitin related modifier 1	GO:0034227//tRNA thio-modification;GO:0002098//tRNA wobble uridine modification	GO:0016783//sulfurtransferase activity	GO:0005737//cytoplasm
146	Unigene46249_All	1 270 LEN=270; translated	13160	ATDSNMVWIRVKEELNLMAVVKSLMKLYANESDVIGSKVHIKIFPVGPSVMRAVTHYHITSADISRALQKFKFVSDMIESGKIDLDSLKM	94	48.9	-	4	4	4	4	1.183	0.984	0.885	4	4	3	-	-	-	Unigene46249_All	35.9	4e-08	gi|390345600|ref|XP_784851.3|	PREDICTED: uncharacterized protein R102.4-like [Strongylocentrotus purpuratus]	-	-	-	-	35.9	1e-07	H3I4D1	H3I4D1_STRPU Uncharacterized protein OS=Strongylocentrotus purpuratus GN=SPU_008871gn PE=4 SV=1	-	-	-	-	-	-	-	K01620|1|4e-09|59.7|spu:579654|threonine aldolase [EC:4.1.2.5]	-	-
147	Unigene15333_All	259 1182 minus strand predicted protein [Micromonas pusilla CCMP1545] >gi|226454801|gb|EEH52106.1| predicted protein [Micromonas pusilla CCMP1545]	45278	KKKVAMLLSYCGVGYQGMQINPASKTIEKDLLNALYKTGCVPDGSRMGKMNFQRCARTDKGVSAAGQVVSLRLLLLDNLVEKLNEHLPSVIRVMDIKRTTGSFNSKHHCNYRTYMYLLPTYSFQDVEDITTETYRITDEKLQEVNDLLAKYKGTHNFHNFTSGKLHDDMSANRYIMDFTCEKAFVDEGMEFAIMRVKGQSFMLHQIRKMIGIIIAILRGFASKNTLEKAFESKKLDIPRAPGLGLVLESVHYDWYNKKWSGDGVHDSLSWEDCKEKQEEFKRKHIYPNIIVREKYNKSMMHWLGTLPL	35	3.2	-	1	1	1	1	---	---	---	1	-	1	-	-	-	Unigene15333_All	67.1	5e-121	gi|390356993|ref|XP_796203.3|	PREDICTED: tRNA pseudouridine synthase A, mitochondrial-like isoform 2 [Strongylocentrotus purpuratus]	56.05	6e-97	sp|Q9Y606|TRUA_HUMAN	tRNA pseudouridine synthase A, mitochondrial OS=Homo sapiens GN=PUS1 PE=1 SV=3	66.67	1e-113	H3I1T3	H3I1T3_STRPU Pseudouridine synthase OS=Strongylocentrotus purpuratus GN=SPU_007956gn PE=3 SV=1	YPL212c	187	2e-47	COG0101	Pseudouridylate synthase	J	Translation, ribosomal structure and biogenesis ;	K06173|1|1e-121|436|spu:591551|tRNA pseudouridine38-40 synthase [EC:5.4.99.12]	GO:0008033//tRNA processing;GO:0001522//pseudouridine synthesis	GO:0003676//nucleic acid binding;GO:0004730//pseudouridylate synthase activity	GO:0031981//nuclear lumen
148	Unigene2197_All	11 376 minus strand glycoside hydrolase [Coccomyxa subellipsoidea C-169]	15478	FSWDWGPAFAPQGVWKNLSIQAFDAAVITDVLAIPLPNGDFSMWKLNVTVFFSVGALPANSSASGTISVTSPFTMVEDVPIKLTRDRPNYNILLDEVKLSEENLWWPHGFGKQRLYQLNVTF	29	11.5	-	1	1	1	1	---	---	---	1	1	1	-	-	-	Unigene2197_All	40.65	9e-18	gi|390335828|ref|XP_798406.2|	PREDICTED: beta-mannosidase-like [Strongylocentrotus purpuratus]	33.33	2e-09	sp|Q0CI48|MANBA_ASPTN	Probable beta-mannosidase A OS=Aspergillus terreus (strain NIH 2624 / FGSC A1156) GN=mndA PE=3 SV=1	40.65	5e-17	H3I376	H3I376_STRPU Uncharacterized protein OS=Strongylocentrotus purpuratus GN=SPU_008458gn PE=4 SV=1	-	-	-	-	-	-	-	K01192|1|1e-18|92.0|spu:593854|beta-mannosidase [EC:3.2.1.25]	GO:0044238//primary metabolic process	GO:0004553//hydrolase activity, hydrolyzing O-glycosyl compounds	-
149	Unigene29219_All	4 1509 minus strand unnamed protein product [Blastocystis hominis]	68429	VILRPGPYICAEWEFGGLPSWLLAEDEMEVRTMYPTFIDAMGKYFDELIPKVVPLQYGNGGPIIAVQVENEYGSFGKDKNYMKQVKEALTSRGIVEMLVSSENGRIPMENAYLKDVLMTANFQENADRHFDDLIRMQGADKPVMVMEFWTGWFDHWGEKHHIYSAEDFSRLVEAVLKRQASINFYMFHGGTNFGFMNGGNFQNGPKGKHQYLPTVTSYDYDAPIAEDGDITDKFLKIKELLKEYVPEETKNIPDLPADIPKRAYADVEITHYMPLDTLLEVNGKPIINDEILPMEKLPINGNSGQGYGYLLYRTYTQKKPTQLKFEHPPHDRAQIFLNGQPEGIVQRRHDTSETVLELKGGKEGENSIEILVENQGRVNYGHDIKIERKGIIGDVFVNG…	588	26.3	-	49	49	13	13	0.986	1.136	2.075	37	37	37	-	*	*	Unigene29219_All	79.07	3e-12	gi|301763006|ref|XP_002916929.1|	PREDICTED: beta-galactosidase-1-like protein 3-like [Ailuropoda melanoleuca]	44.64	8e-99	sp|Q5XIL5|GLBL3_RAT	Beta-galactosidase-1-like protein 3 OS=Rattus norvegicus GN=Glb1l3 PE=2 SV=1	47.04	3e-110	G3WN51	G3WN51_SARHA Beta-galactosidase OS=Sarcophilus harrisii GN=GLB1L2 PE=3 SV=1	XF0840	323	4e-88	COG1874	Beta-galactosidase	G	Carbohydrate transport and metabolism ;	K12309|1|2e-74|280|xla:100158367|beta-galactosidase [EC:3.2.1.23]	-	GO:0016787//hydrolase activity	-
150	CL4088.Contig5_All	219 647 minus strand protocadherin-like protein [Phytophthora infestans T30-4] >gi|262098392|gb|EEY56444.1| protocadherin-like protein [Phytophthora infestans T30-4]	19205	CAEVKAQCSNNNSSGVFVIKPEGFDEPFEVFCENDIDGGGWTVIQRRVDGSINFDRSWSDYKEGFGFLRSEFWIGNQKLSFLTNQKKYQLRIDFENSAGSSFFATYEAFRISDEFSKFRIVSVGKSTGTIDSFIETCPSNMVF	124	23.8	-	13	8	4	3	0.569	7.048	1.147	5	5	5	-	*	-	CL4088.Contig5_All	52.58	4e-26	gi|47224317|emb|CAG09163.1|	unnamed protein product [Tetraodon nigroviridis]	51.09	2e-21	sp|D8VNT0|FCNV4_CERRY	Ryncolin-4 OS=Cerberus rynchops PE=1 SV=1	52.58	2e-25	Q4RR19	Q4RR19_TETNG Chromosome 14 SCAF15003, whole genome shotgun sequence OS=Tetraodon nigroviridis GN=GSTENG00030360001 PE=4 SV=1	-	-	-	-	-	-	-	K10104|1|5e-28|122|spu:581954|ficolin!K05467|2|1e-26|118|cfa:609626|angiopoietin 4	-	-
151	Unigene5277_All	1 788 LEN=788; translated	37211	XAKRFANVVPVQTVRQIALKGTNFEENSLQIMTKPSFFKRYRVLIVGLGGLGLIHLAWYRMSKNPKYSGITEDAPVQIKPRYIKKKNAKEATAXSHSIMALKKWILDHKFLSAFLAVASIHIGIYSLQKLAKAKKPPERLSLVIEDSPXKGFREIMMSSNSNQPNLHKEDNNGSIVKISNPEKLQVISSLKQFLLSCFGPQGRAKYVQNSHGALMTISASSQKLFSNLTFASPISQLVASSILQHLSAYSDNGLYMGIVVSSLX	58	5.7	-	1	1	1	1	---	---	---	1	1	1	-	-	-	Unigene5277_All	40.86	8e-12	gi|291224829|ref|XP_002732405.1|	PREDICTED: McKusick-Kaufman syndrome protein-like [Saccoglossus kowalevskii]	36.36	3e-09	sp|Q9NPJ1|MKKS_HUMAN	McKusick-Kaufman/Bardet-Biedl syndromes putative chaperonin OS=Homo sapiens GN=MKKS PE=1 SV=1	40.54	1e-06	G3NKQ2	G3NKQ2_GASAC Uncharacterized protein OS=Gasterosteus aculeatus GN=MKKS PE=4 SV=1	-	-	-	-	-	-	-	K09492|1|5e-19|95.1|spu:581756|McKusick-Kaufman syndrome protein	GO:0060271//cilium morphogenesis;GO:0065008//regulation of biological quality;GO:0003006//developmental process involved in reproduction;GO:0007507//heart development;GO:0051649//establishment of localization in cell;GO:0044267//cellular protein metabolic process;GO:0030031//cell projection assembly;GO:0044321//response to leptin stimulus;GO:0007600//sensory perception;GO:0050794//regulation of c…	GO:0005515//protein binding	GO:0005813//centrosome
152	CL6907.Contig2_All	493 3201 minus strand topoisomerase I [Catharanthus roseus]	152336	PNLKHRDPNLKAKDPSLKNKDHSTKPKEPSLKPKDPSQKPRDPSLKPKDPNMRPKDPNYKSKDPSLKHKEHNSKPSDPNKPRDPSLKPKDPNKKLKEGYVRMKDGSIRLKDPNAKSSSGSIKPKDPNRHSSSSSGDSKNQIKKEKRPDGTKGEVRKDGQVVKRPDGSTVVIKREGEHAKKHHSSDPSKVKVKVKTENDGKPRVKHKEGSAVTKVKTENGAVSVKSPSPVKSVKREPESDDEDEIPLNQRLQTQGNQKRPLEDSEDDEPLTARIEKVKKQKVHESDDEFVPVKTKKRKTQDEEDEDFDDKPLKKKKKVDGTKKKKDKKSSGKEEKPKKKKKKEEATEVWKWWEEEPLPEGVKWKFLEHKGPVFAPLYEPIPPKIKFFYNGEHLLLSPEAE…	59	1	-	2	2	1	1	0.863	1.301	1.563	2	2	2	-	-	-	CL6907.Contig2_All	78.65	0	gi|115898767|ref|XP_801858.2|	PREDICTED: DNA topoisomerase 1-like isoform 3, partial [Strongylocentrotus purpuratus]	73.67	0	sp|Q7YR26|TOP1_CHLAE	DNA topoisomerase 1 OS=Chlorocebus aethiops GN=TOP1 PE=2 SV=1	75.59	0	H3JIL2	H3JIL2_STRPU Uncharacterized protein OS=Strongylocentrotus purpuratus GN=SPU_026427gn PE=4 SV=1	YOL006c_1	412	2e-114	COG3569	Topoisomerase IB	L	Replication, recombination and repair ;	K03163|1|0.0|879|acs:100559150|DNA topoisomerase I [EC:5.99.1.2]	GO:0012501//programmed cell death;GO:0040016//embryonic cleavage;GO:0006260//DNA replication;GO:0007059//chromosome segregation;GO:0016310//phosphorylation;GO:0042493//response to drug;GO:0019048//virus-host interaction;GO:0006265//DNA topological change;GO:0006338//chromatin remodeling	GO:0003917//DNA topoisomerase type I activity;GO:0005524//ATP binding;GO:0005515//protein binding;GO:0003918//DNA topoisomerase type II (ATP-hydrolyzing) activity;GO:0003682//chromatin binding	GO:0031298//replication fork protection complex;GO:0005730//nucleolus;GO:0000932//cytoplasmic mRNA processing body;GO:0005654//nucleoplasm;GO:0043204//perikaryon
153	Unigene25501_All	1409 2056 hypothetical protein AURANDRAFT_71908 [Aureococcus anophagefferens]	26468	DYRGDIAFDDVMITGAICPGEYVYTNTSGVSCDFESVDICYYKQDQTDTADWTWQNGATRDHFSGPEHDKTRGDELGFYLVFAGDPSSPGTGLARLISPKFQATTGTSCLEFWYHMYGNDVEALNVYVVNENYRTLPQTPTWSASGDKGNYWHRATITFARKTTESRIVFEGRNGVKERDDIAIDEVTLYASSACPDFVTDAPPPTTRPVTVNDIS	93	6.5	-	4	4	1	1	0.161	0.71	0.367	4	4	4	*	-	*	Unigene25501_All	56.58	1e-20	gi|390334046|ref|XP_003723835.1|	PREDICTED: thyroid hormone-induced protein B-like [Strongylocentrotus purpuratus]	38.89	2e-23	sp|Q8NFP4|MDGA1_HUMAN	MAM domain-containing glycosylphosphatidylinositol anchor protein 1 OS=Homo sapiens GN=MDGA1 PE=1 SV=1	53	3e-23	H3JNL7	H3JNL7_STRPU Uncharacterized protein OS=Strongylocentrotus purpuratus GN=SPU_028212gn PE=4 SV=1	-	-	-	-	-	-	-	K01316|1|9e-17|87.0|pon:100431479|protease, serine, 7 (enterokinase) [EC:3.4.21.9]	-	-
154	CL11456.Contig2_All	559 2616 endothelin-converting enzyme [Galdieria sulphuraria]	88230	SGSSEYAQIIDSLDETVDPCDNFYEYACGGWKSTQTVPTGHSKWNTFNIVEMENKAAMKEMFGSEDTSYKGQESSAFRKTKDYYKACMDLDRTGLLGAQPLIDLVHKFGGWPLFGEDISAGGWNQSSYNLTLLLIASNKITVSPFFNMWVGADDRNSSRNIVQFEQSGLGLQFPEMYEGPSMDAIVEGYKVLGAKTAAYLHKGKDWESFYDIALTRFQDIIDFEIEMSHIYVPKREMQDPTATYHKMQLKEFGAMFPMVNISLFMQEIFGEVIPLTEEVIVYTPSFFPKLTHLLQNTPEKLIVDYFMWQMLQPFLTYVSAPFENLYREFQEIFSGTPDLPPRWQRCVSRTDSAFGFATGAMFVETILPQNIKEAAVEMIEEVKSAFIGTLPENEWMDDT…	36	3.8	-	2	2	2	2	0.696	1.946	1.11	2	2	2	-	-	-	CL11456.Contig2_All	41.2	1e-159	gi|326674029|ref|XP_001333228.3|	PREDICTED: endothelin-converting enzyme 2 [Danio rerio]	40.41	3e-156	sp|P42893|ECE1_RAT	Endothelin-converting enzyme 1 OS=Rattus norvegicus GN=Ece1 PE=1 SV=2	53.33	2e-21	G7NUV2	G7NUV2_MACFA Putative uncharacterized protein OS=Macaca fascicularis GN=EGM_00310 PE=4 SV=1	MA2001	304	4e-82	COG3590	Predicted metalloendopeptidase	O	Posttranslational modification, protein turnover, chaperones ;	K01415|1|2e-160|566|dre:793465|endothelin-converting enzyme [EC:3.4.24.71]	GO:0043171//peptide catabolic process;GO:0042445//hormone metabolic process;GO:0016485//protein processing;GO:0050789//regulation of biological process;GO:0060037//pharyngeal system development	GO:0070011//peptidase activity, acting on L-amino acid peptides	GO:0016020//membrane;GO:0043231//intracellular membrane-bounded organelle;GO:0031982//vesicle;GO:0044444//cytoplasmic part
155	CL3970.Contig3_All	1 1504 LEN=1504; minus strand; translated	71865	XVIIDGGLTVQDKKSILINSLKRRYKLQYDAIQPIPYIKDRLYCVDKVFVEGGTEIYIVEGATKEKEGPWVRVDSYKDIFTDPRMKAKRRIIEAEAGYGKSTVTLQLAYDWCNGVKDSPFKDVEILILLRLRQLNSKISIYQAIKLFLAPNDPRIKSSDIKDIIESCSSVKVLLDGYDEFPDRDGATGSDVGRIITSNLLGNIDVTLTTRYLPKDYDKSNTKYVRLVGFDEKARDQYIRKAVTGEDDESVAKIKRALKENPILDDLCQVPLLFVMFSHMTHEKTHFQKFKSVTGFFRYMIKCFHSHMRNKSLDKHAKEHMSEHESEHDELSKVAFEGLCGENKQLSWRKDGLCTRLGQGFCQHYIAVGILVEEEVSAETNEQTSTTDIQTRTDLRFYHQ…	279	18.1	-	25	25	10	10	0.855	1.12	1.663	18	18	18	*	-	*	CL3970.Contig3_All	37.04	3e-09	gi|390338425|ref|XP_003724776.1|	PREDICTED: uncharacterized protein LOC100892100 [Strongylocentrotus purpuratus]	-	-	-	-	40.32	2e-06	H3J6B7	H3J6B7_STRPU Uncharacterized protein (Fragment) OS=Strongylocentrotus purpuratus GN=SPU_022070gn PE=4 SV=1	-	-	-	-	-	-	-	K15015|1|8e-25|115|spu:584114|solute carrier family 32 (vesicular inhibitory amino acid transporter)	-	-
156	CL759.Contig2_All	270 1541 hypothetical protein GUITHDRAFT_159886 [Guillardia theta CCMP2712]	55716	KNIVLVEGVRTPFLMSGTEYADLMPHDLARGALQGLLQKTKIPTEMVDQIIFGTVIQEVKTANIAREAALGAGFAKSVPAHSVTMACISSNQAISTGIGYIASGNADIVVAGGVDFMSDVPIRHSRQMRKFMLNLGKAKTAGAKLGLASKYLSLKALSPELPGIAEFSTGEIMGHSADRLAAAFGVSRKEQDEYSIRSHTFADNATKDGNLSDRLTYIVPKTGKVVERDNGIRVSSMEKMSKLKPAFIKPHGSITAANSSFVSDGASACLIMTEEKALEMGYKPKAYLRDFVFVAIDPKDQLLLGPAYATPQVLDKAGLKLSDIDVFEYHEAFAGQILSNLKAMNSDHFAKKYQHRKGKLGEIPMDKFNLWGGSLSIGHPFGATGVRLVTTVANRLEKE…	1825	29.2	-	72	72	11	11	1.254	1.076	1.678	57	59	59	*	-	*	CL759.Contig2_All	76.6	8e-77	gi|343459089|gb|AEM37703.1|	hydroxyacyl-Coenzyme A dehydrogenase [Epinephelus bruneus]	68.71	1e-161	sp|Q99JY0|ECHB_MOUSE	Trifunctional enzyme subunit beta, mitochondrial OS=Mus musculus GN=Hadhb PE=1 SV=1	73.13	7e-79	Q28CG3	Q28CG3_XENTR Hydroxyacyl-Coenzyme A dehydrogenase/3-ketoacyl-Coenzyme A thiolase/enoyl-Coenzyme A hydratase (Trifunctional protein), beta subunit (Fragment) OS=Xenopus tropicalis GN=hadhb PE=2 SV=1	YPO2746	328	1e-89	COG0183	Acetyl-CoA acetyltransferase	I	Lipid transport and metabolism ;	K07509|1|1e-167|590|xla:379769|acetyl-CoA acyltransferase [EC:2.3.1.16]	GO:0008152//metabolic process	GO:0016747//transferase activity, transferring acyl groups other than amino-acyl groups	GO:0005743//mitochondrial inner membrane;GO:0005741//mitochondrial outer membrane;GO:0005783//endoplasmic reticulum
157	CL10111.Contig3_All	636 1076 minus strand ---	19989	LYDDWSTSYDQVIPEEIGSQRPLEVSSALAEVCDSKDIKVLDCGSGTGLIGEALKAKGFTNVSAADISQQSLDVAEKKGIYQKLFCFDIGKDKMPFNDHEFDALTCIGCIVPAHISPDAIRELIKIVKPGGVFIFSSRECFIEVIQG	107	16.3	-	4	4	2	2	0.948	0.503	0.864	4	4	4	-	*	-	CL10111.Contig3_All	39.19	4e-21	gi|260836473|ref|XP_002613230.1|	hypothetical protein BRAFLDRAFT_73168 [Branchiostoma floridae] >gi|229298615|gb|EEN69239.1| hypothetical protein BRAFLDRAFT_73168 [Branchiostoma floridae]	32.14	2e-12	sp|Q8N6F8|WBS27_HUMAN	Williams-Beuren syndrome chromosomal region 27 protein OS=Homo sapiens GN=WBSCR27 PE=2 SV=2	39.57	4e-20	E1JRQ7	E1JRQ7_DESFR Methyltransferase type 11 OS=Desulfovibrio fructosovorans JJ GN=DesfrDRAFT_0306 PE=4 SV=1	AGc3455	58.5	3e-09	COG4976	Predicted methyltransferase (contains TPR repeat)	R	General function prediction only ;	-	-	-
158	Unigene22014_All	125 823 hypothetical protein SELMODRAFT_179181 [Selaginella moellendorffii] >gi|302802135|ref|XP_002982823.1| hypothetical protein SELMODRAFT_268656 [Selaginella moellendorffii] >gi|300149413|gb|EFJ16068.1| hypothetical protein SELMODRAFT_268656	31448	ELLLDTNIRFWVVLPIVFITFFVGIIRHYVSLLLSSQKKVDLQKVSDGQVLMRSKLLRENGKYLPKRSFQMRKHYFNDEETGFFKTQNREPAMQNPMADPSMLTEMMKGNLTNILPMIVIGGWINWTFSGFVITKVPFPLTLRFKPMLQRGVELASLDASWVSSASWYFLNVFGLRSVYSLILGENNAADQTRLMQQQMAQPMAMAPDPAKAFKAEWETLEIVDHKWMLANVE	98	5.2	-	2	2	1	1	0.999	1.353	0.993	2	2	2	-	-	-	Unigene22014_All	85.84	9e-107	gi|115625689|ref|XP_782919.2|	PREDICTED: transmembrane protein 111-like [Strongylocentrotus purpuratus]	72.65	6e-95	sp|Q7SXW4|EMC3_DANRE	ER membrane protein complex subunit 3 OS=Danio rerio GN=emc3 PE=2 SV=1	77.94	8e-51	Q4TDC5	Q4TDC5_TETNG Chromosome undetermined SCAF3550, whole genome shotgun sequence. (Fragment) OS=Tetraodon nigroviridis GN=GSTENG00000982001 PE=4 SV=1	-	-	-	-	-	-	-	-	GO:0045494//photoreceptor cell maintenance;GO:0060041//retina development in camera-type eye	-	GO:0072546//ER membrane protein complex;GO:0030140//trans-Golgi network transport vesicle
159	CL7095.Contig1_All	231 956 minus strand PREDICTED: probable calcium-binding protein CML49-like isoform 1 [Brachypodium distachyon] >gi|357161050|ref|XP_003578962.1| PREDICTED: probable calcium-binding protein CML49-like isoform 2 [Brachypodium distachyon]	28676	PPGGYQPRYGAPPQGQGGYGAPPQGQAGYGAPPPQRAPYGAPAGQPYGAAPYGGQQQQPYGAPGYGQQPPPAGPPPGVDPNIYSWFVSVDQDKSGQITATELQQALTNSNWSHFNAETCRLMIGIFDRDQSGTINIQEFSALWNYIQQWKGVFERYDQDKSGAIEANELSTAFVQMGYNVSPQFTQMLVAKYDIAARRSLKLDDFIQACVMLKSLTDSFRQRDTNMNGTITISYEDFMSLVL	89	5	1	3	3	1	1	1.507	1.015	0.627	3	3	3	-	-	*	CL7095.Contig1_All	73.25	3e-64	gi|260786751|ref|XP_002588420.1|	hypothetical protein BRAFLDRAFT_198713 [Branchiostoma floridae] >gi|229273582|gb|EEN44431.1| hypothetical protein BRAFLDRAFT_198713 [Branchiostoma floridae]	53.94	1e-49	sp|Q9UBV8|PEF1_HUMAN	Peflin OS=Homo sapiens GN=PEF1 PE=1 SV=1	73.25	9e-64	C3ZSM9	C3ZSM9_BRAFL Putative uncharacterized protein (Fragment) OS=Branchiostoma floridae GN=BRAFLDRAFT_198713 PE=4 SV=1	-	-	-	-	-	-	-	K07359|1|2e-43|176|dpo:Dpse_GA27481|calcium/calmodulin-dependent protein kinase kinase [EC:2.7.11.17]!K08583|2|9e-21|100|rno:29156|calpain, small subunit 1	-	GO:0005509//calcium ion binding	-
160	CL7922.Contig2_All	1 1563 LEN=2984; translated	74059	ETTDFAILLKDLDSSNGDLKQFSRMIRRRLPTGSGDDQGGPSSISYGVEVQNSISECSDFLSKMVTAMRMFGQNAMKTASSLSGDVEGIPVKQLEEYAEAACSAVFGKDDKGPYQSFRETLVKAMVVMNNISSAMQNGEYDANIPQEKVVGPVEKRALKVKAEICDAEGLGHKLESKENEVKDIKRQLKLKQEEVSAASVRLGLVEKKLENASRDGEEKVHKLEQKLSNSQDHMKKKEREFDLTLDHMQNDIDALEKEKQELKQRLTQLSKKTLYESLTGRPGAPSSIAAAVVGETDGAPPSEQVQVRDSPLLLHQVESLKKALYHVKRENTHLRGRKMKTIMDELPPLVVPKKPVGLMSPTGFVSIEVENPEKASPAANQLSDLVRQSGKLMKDLQEL…	55	5.4	-	2	2	2	2	1.121	1.4	1.275	2	2	2	-	-	-	CL7922.Contig2_All	55.45	2e-158	gi|390343201|ref|XP_784891.3|	PREDICTED: dynactin subunit 1-like [Strongylocentrotus purpuratus]	38.35	8e-85	sp|Q6PCJ1|DCTN1_XENLA	Dynactin subunit 1 OS=Xenopus laevis GN=dctn1 PE=2 SV=1	55.45	9e-158	H3IIJ7	H3IIJ7_STRPU Uncharacterized protein OS=Strongylocentrotus purpuratus GN=SPU_013935gn PE=4 SV=1	-	-	-	-	-	-	-	K04648|1|3e-157|555|spu:579698|dynactin 1	-	-	GO:0044424//intracellular part
161	CL1187.Contig1_All	181 576 hypothetical protein PHYSODRAFT_347058 [Phytophthora sojae] >CL1187.Contig2_All 181 576 minus strand hypothetical protein PHYSODRAFT_347058 [Phytophthora sojae]	16271	LPLSLLRTAQNHPMLVELKNGETYNGHLVACDNWMNINLREVICTSRDGDRFWRMPECYIRGSTIKYLRIPDEVIDMVKEEVVAKSRGRGGGMRGRGRGGRGGAFGRGGRGGKGDNRRPNRGGGGGGGGRGG	35	7.6	-	3	3	1	1	---	---	---	1	1	1	-	-	-	CL1187.Contig1_All	97.67	2e-44	gi|390362890|ref|XP_003730251.1|	PREDICTED: U6 snRNA-associated Sm-like protein LSm4-like [Strongylocentrotus purpuratus]	94.19	3e-44	sp|Q9Y4Z0|LSM4_HUMAN	U6 snRNA-associated Sm-like protein LSm4 OS=Homo sapiens GN=LSM4 PE=1 SV=1	98.82	6e-47	H3JLD4	H3JLD4_STRPU Uncharacterized protein (Fragment) OS=Strongylocentrotus purpuratus GN=SPU_027419gn PE=4 SV=1	YER112w	70.5	6e-13	COG1958	Small nuclear ribonucleoprotein (snRNP) homolog	K	Transcription ;	K12623|1|4e-45|179|spu:753538|U6 snRNA-associated Sm-like protein LSm4	GO:0008380//RNA splicing;GO:0043928//exonucleolytic nuclear-transcribed mRNA catabolic process involved in deadenylation-dependent decay;GO:0006397//mRNA processing	GO:0003723//RNA binding;GO:0005515//protein binding	GO:0005688//U6 snRNP;GO:0005829//cytosol
162	CL9888.Contig1_All	46 378 predicted protein [Physcomitrella patens subsp. patens] >gi|168015295|ref|XP_001760186.1| predicted protein [Physcomitrella patens subsp. patens] >gi|162688566|gb|EDQ74942.1| predicted protein [Physcomitrella patens subsp. patens] >gi|1626	16851	MVASKKQKKQMESINSRLQLVMKSGKYFLGIKQTLKSLRQGKAKLIILASNTPQLRKSEIEYYAMLAKTGVHHYSGNNIELGTACGKYFRVCTLCITDPGDSDIIRTMPSD	199	32.4	-	18	18	4	4	0.98	1.038	1.139	11	11	11	-	-	-	CL9888.Contig1_All	97.3	3e-58	gi|390483336|gb|AFL93469.1|	ribosomal protein L30 [Apostichopus japonicus]	85.98	9e-51	sp|P58374|RL30_BRABE	60S ribosomal protein L30 OS=Branchiostoma belcheri GN=RPL30 PE=3 SV=1	90.09	1e-53	H3I998	H3I998_STRPU Uncharacterized protein OS=Strongylocentrotus purpuratus GN=SPU_010626gn PE=3 SV=1	SPAC1250.05	149	1e-36	COG1911	Ribosomal protein L30E	J	Translation, ribosomal structure and biogenesis ;	K02908|1|3e-55|213|spu:577852|large subunit ribosomal protein L30e	GO:0006412//translation	GO:0003735//structural constituent of ribosome	GO:0005840//ribosome
163	Unigene12320_All	45 407 minus strand unknown [Lotus japonicus]	17975	APKAAGKGAKKAAKSKAPRNPGDKKRRRTRRETYSIYIYKVMKQVHPDTGISSRAMSIMNSFVNDIFERIAAEASRLAHYNRKSTITSREVQTAVRLLLPGELAKHAVSEGTKAVTKYTTS	1524	37.2	-	99	99	5	5	1.35	0.877	0.816	83	84	85	-	-	-	Unigene12320_All	96.12	8e-52	gi|1346252|sp|P48557.1|H2B_HOLTU	RecName: Full=Histone H2B >gi|559457|emb|CAA86297.1| histone H2B [Holothuria tubulosa] >gi|1588652|prf||2209257A histone H2B	96.12	9e-53	sp|P48557|H2B_HOLTU	Histone H2B OS=Holothuria tubulosa PE=3 SV=1	91	9e-47	P91961	P91961_PSAMI Histone H2B OS=Psammechinus miliaris GN=CS H2B PE=2 SV=1	-	-	-	-	-	-	-	K11252|1|5e-49|192|acs:100557833|histone H2B	GO:0006334//nucleosome assembly	GO:0003677//DNA binding;GO:0046982//protein heterodimerization activity	GO:0000786//nucleosome;GO:0000790//nuclear chromatin;GO:0035267//NuA4 histone acetyltransferase complex;GO:0005811//lipid particle
164	Unigene59220_All	23 646 minus strand hypothetical protein GUITHDRAFT_73946 [Guillardia theta CCMP2712]	25793	ILGWVFLPVYLAGGVFTMPDYLKKRLGGQRIQMYIAFLSLLLYIFTKISVDLFSGALFIQEALGWNLYPAIMSLLFITAIYTVTGGLAAVIYTDTLQAFIMLGGAAYLCARTFQEIGGYNTLEDQYMTAYPNETKYGNDSCGYPREDSFHMLRAPRGSDLPWPGFIFGQTTASLWYWCSDQVIVQRALSAKNLSHGKGATLFAGLCKI	24	4.8	-	1	1	1	1	---	---	---	-	-	-	-	-	-	Unigene59220_All	75.96	3e-89	gi|390345394|ref|XP_794573.3|	PREDICTED: sodium/glucose cotransporter 4-like [Strongylocentrotus purpuratus]	61.84	2e-70	sp|Q8VDT1|SC5A9_MOUSE	Sodium/glucose cotransporter 4 OS=Mus musculus GN=Slc5a9 PE=2 SV=3	73.08	3e-85	H3HVF7	H3HVF7_STRPU Uncharacterized protein (Fragment) OS=Strongylocentrotus purpuratus GN=SPU_005684gn PE=3 SV=1	BH2222	79.7	3e-15	COG4146	Predicted symporter	R	General function prediction only ;	K14383|1|6e-77|286|nve:NEMVE_v1g163024|solute carrier family 5 (sodium/myo-inositol cotransporter), member 3!K14391|2|2e-73|275|xtr:100488766|solute carrier family 5 (sodium/myo-inositol cotransporter), member 11	GO:0055085//transmembrane transport	GO:0005215//transporter activity	GO:0016021//integral to membrane
165	Unigene22466_All	714 1067 minus strand hypothetical protein AURANDRAFT_16330, partial [Aureococcus anophagefferens]	16698	VDIFMRLFTQDPPSQDLFDQLRGIPLDELAANRKMKAHAFRVAASLNTLVEGLDDIEVLIEMLNNVARTHFSHQVTKQHYDLLGKVLMEAFEDELKDKFNQRTKDAWLKAYGVMEKVM	218	16.9	-	8	8	3	3	1.957	0.567	1.434	7	7	7	*	*	*	Unigene22466_All	44.07	6e-21	gi|390358057|ref|XP_003729167.1|	PREDICTED: cytoglobin-2-like, partial [Strongylocentrotus purpuratus]	43.22	3e-24	sp|P80018|GLBC_CAUAR	Globin C, coelomic OS=Caudina arenicola PE=1 SV=3	44.07	3e-20	H3HZ90	H3HZ90_STRPU Uncharacterized protein OS=Strongylocentrotus purpuratus GN=SPU_007045gn PE=3 SV=1	DRA0243_1	52.8	1e-07	COG1017	Hemoglobin-like flavoprotein	C	Energy production and conversion ;	-	-	GO:0005488//binding	-
166	CL6937.Contig1_All	59 1381 minus strand predicted protein [Physcomitrella patens subsp. patens] >gi|162695264|gb|EDQ81608.1| predicted protein [Physcomitrella patens subsp. patens]	60840	MADYDLTRKIGQYLDRHLVFPLLEFLSAKQIYNEGDMLKGKLELLSNTNMVDFAMDVFRQLYPNQEVPKTLRDKRSSVVTQLKQLQSETEPIIKIFEDQTVVEQIESTRDGRDLFQFLEKEHNFKLKMLDTLYAYAKFQYECGNYTGATEYLSFHRVLVPPEDKRAISSLWGKLASEILMQNWDASLEDLQRLQEVIDSNQSFTTPLQMLQQRNWLIHWSLFVYFNHPQGREFIIERFLYQAHYLNAIQTACPHILRYLTTAVITNKSLKTKRQQVLKDLVKVIQQETYTYRDPITEFIECLYVNFDFDMAQQKLRECETVLTNDFFLVALLDDFIENARHLIFETFCRIHNCISIDMLAEKLNMASEQAERWIVNLIRDAPRDAPLDAKIDSKLGHVV…	217	17.7	-	16	16	7	7	0.673	1.027	0.905	13	13	13	*	-	-	CL6937.Contig1_All	87.14	2e-29	gi|390362943|ref|XP_782397.3|	PREDICTED: eukaryotic translation initiation factor 3 subunit E-like [Strongylocentrotus purpuratus]	73.43	0	sp|Q05AY2|EI3EA_XENLA	Eukaryotic translation initiation factor 3 subunit E-A OS=Xenopus laevis GN=eif3e-a PE=2 SV=1	79.78	1e-75	F7C7V1	F7C7V1_HORSE Uncharacterized protein OS=Equus caballus GN=EIF3E PE=4 SV=1	-	-	-	-	-	-	-	K03250|1|0.0|657|xla:398503|translation initiation factor 3 subunit E	GO:0006413//translational initiation;GO:0043473//pigmentation;GO:0043010//camera-type eye development;GO:0048703//embryonic viscerocranium morphogenesis	GO:0003743//translation initiation factor activity	GO:0005852//eukaryotic translation initiation factor 3 complex;GO:0005634//nucleus
167	Unigene3717_All	243 800 predicted protein [Physcomitrella patens subsp. patens] >gi|162679593|gb|EDQ66039.1| predicted protein [Physcomitrella patens subsp. patens]	24392	LVVAITSDNIEGTDRPPYHEYAKRARYIVNRANWTVMATFSYHDPITGFPYARVESCVDGLLHKGTGTPYFYLMKDGTPMQNIKKCNNVTLSYSEAEFNDIKSCTVSPTSDPENPLCSRLMLYGNSYEVTDKAEHQMAQSALFTRHPIMKDFPPGHQFTVYGFKLSYIYLLDFYGGAVSIDIADYY	174	18.8	-	8	8	3	3	0.784	1.255	1.287	7	7	7	-	-	-	Unigene3717_All	48.89	2e-48	gi|72133119|ref|XP_796937.1|	PREDICTED: protein CREG1-like isoform 2 [Strongylocentrotus purpuratus] >gi|390352136|ref|XP_003727825.1| PREDICTED: protein CREG1-like isoform 1 [Strongylocentrotus purpuratus]	32.75	6e-22	sp|O75629|CREG1_HUMAN	Protein CREG1 OS=Homo sapiens GN=CREG1 PE=1 SV=1	48.89	8e-48	H3J209	H3J209_STRPU Uncharacterized protein OS=Strongylocentrotus purpuratus GN=SPU_020541gn PE=4 SV=1	-	-	-	-	-	-	-	-	-	-
168	Unigene26682_All	28 588 minus strand hypothetical protein AURANDRAFT_31924 [Aureococcus anophagefferens]	26408	DENDKNAYDDVHYVETWKAMEKLVEKGLAISIGVSNFNVSQMEEIVTAAQVPCVMNQIEIHPAIDQSDIITYCKAKSIALTAYSPFGSPDRPWASDKDPNLFEDPVVKEIAESRGCTAGQVLLAYHLNQEIVVVPKSVTPSRIKENFEALSIKLKPEEITKLKELNSTNYRACAMNMLKDHPYFPFK	66	14.4	-	5	5	3	3	1.073	1.202	0.994	3	3	3	-	-	-	Unigene26682_All	49.16	5e-42	gi|390349257|ref|XP_784643.2|	PREDICTED: aldose reductase-related protein 2-like [Strongylocentrotus purpuratus]	48.07	6e-44	sp|P80276|ALDR_PIG	Aldose reductase OS=Sus scrofa GN=AKR1B1 PE=1 SV=2	52.3	1e-44	H3BE97	H3BE97_LATCH Uncharacterized protein (Fragment) OS=Latimeria chalumnae PE=4 SV=1	slr0942	147	8e-36	COG0656	Aldo/keto reductases, related to diketogulonate reductase	R	General function prediction only ;	K00011|1|4e-46|184|der:Dere_GG13904|aldehyde reductase [EC:1.1.1.21]	GO:0008152//metabolic process	GO:0016491//oxidoreductase activity	-
169	Unigene16459_All	42 1130 PREDICTED: acyl-CoA dehydrogenase family member 10-like [Brachypodium distachyon]	47488	SERAQQIHKEVKEFMNEYIYPVERELNEHYASKDKWTIHPIFEQLKTKAKENGLWNLFLPIESDPEMRYGAGLTNIEYAHICELMGRSRYAPEVFNCSAPDTGNMEVLVRYGTKDQQDMWLKPLLEGKIRSCFGMTEPEVASSDATNIRSEIRRDGDDYVLNGRKWWTSGALHPHCKLCIFMGKTDTTEKTHKQQSMILVPMETTGVQILRHLTVFGYDDAPEGHGEVLFDNVRVPASNILLGPGRGFEIAQGRLGPGRIHHCMRLIGMAERALDTMKHRVSERVAFGKLLAEQGTIQADIANSRIEIEQARLLTLKTAHMMDTVGNKVAAPEIAMIKVIAPNMALNVIDRAMQAHGGAGVSA	152	11.8	-	9	9	4	4	1.293	1.03	1.11	6	7	7	*	-	-	Unigene16459_All	73.57	5e-53	gi|197386131|ref|NP_001128009.1|	acyl-CoA dehydrogenase family, member 10 [Rattus norvegicus]	65.29	8e-145	sp|Q6JQN1|ACD10_HUMAN	Acyl-CoA dehydrogenase family member 10 OS=Homo sapiens GN=ACAD10 PE=2 SV=1	72.18	3e-163	H3II06	H3II06_STRPU Uncharacterized protein OS=Strongylocentrotus purpuratus GN=SPU_013742gn PE=3 SV=1	CC0690	409	3e-114	COG1960	Acyl-CoA dehydrogenases	I	Lipid transport and metabolism ;	K11729|1|1e-164|579|spu:588060|acyl-CoA dehydrogenase family member 10	GO:0055114//oxidation-reduction process	GO:0016787//hydrolase activity;GO:0050660//flavin adenine dinucleotide binding;GO:0003995//acyl-CoA dehydrogenase activity;GO:0016772//transferase activity, transferring phosphorus-containing groups	-
170	Unigene49395_All	1 902 LEN=902; minus strand; translated	40783	PKPRAKICVTNVTEYEACRRFKGIAENVPQVKNIAWGCVLANSSMECMKAVHNNTADLFKANPQETFIAGKEFLLDPLMSVHRNDSVTRNHTFTRTLAVIKRSSLSKFPDLLSVPEGQPKYIKDLFKLKICSAGLKNFSAFSNPIGYLLANGTIPRIGSVFESVNRYFQSTCIPEIEPETFRLDSDLLIGRELNWGFSSLNMYNFTGQEWLLWNTPATWNFLTYNRKVSTGLDIKKLIELKRQNLTSHILNQNLTSSNVELLDDLIGVEGLSDLVKGLQDNIRPEGKQRLSMIRERLSNSX	55	3.3	-	5	5	1	1	2.64	1.027	1.817	4	4	4	*	-	*	Unigene49395_All	91	2e-165	gi|38147297|gb|AAK02057.2|	toposome [Tripneustes gratilla]	88.7	1e-161	sp|P19615|MYP_STRPU	Major yolk protein OS=Strongylocentrotus purpuratus PE=1 SV=2	91	8e-165	Q8WQY0	Q8WQY0_TRIGR Toposome OS=Tripneustes gratilla PE=2 SV=2	-	-	-	-	-	-	-	K06569|1|1e-08|60.8|mgp:100546306|melanoma-associated antigen p97	GO:0006879//cellular iron ion homeostasis;GO:0006826//iron ion transport	GO:0045735//nutrient reservoir activity;GO:0008199//ferric iron binding	GO:0005576//extracellular region
171	Unigene20956_All	85 1212 Chain A, Crystal Structure Of An Indole-3-acetic Acid Amido Synthase From Vitis Vinifera Involved In Auxin Homeostasis >gi|430800812|pdb|4B2G|B Chain B, Crystal Structure Of An Indole-3-acetic Acid Amido Synthase From Vitis Vinifera Invol	50188	YVPPFISYLINTSFEAFYVQMLFGIRDKEIGLLMCIFTTHLLEVMHLMENKWPQLLEDLSTGRLSQDLKLAPEVRDALTKELKGGDPERAAELEKEFKKGFDGILSRIWPRLSFIIATDIINIKDQLARTYCKGIPIYVLSFNGSEGLYGVNLDPFSTSAEFVALINCCVFEFIPEENISESNPDTVFIDEVEVGKKYEMVITGESGLYRYRVGDVVEITGYYHKTPKMKFIYRIGTLLNMVGEKVSSDVVRNAVRDAVSMNYPDVRLVYQAVAESNITMELSLDGLSEIKSKGSHYIFFLELEETSRDLLSEFNTTVIAESIDNNLYSRHRFYQNFKDTKQIHPSTVYIVHPGAFYKLRDYVIANSTATANQFKM	37	2.9	-	1	1	1	1	---	---	---	1	1	1	-	-	-	Unigene20956_All	45.79	7e-18	gi|390358801|ref|XP_003729340.1|	PREDICTED: probable indole-3-acetic acid-amido synthetase GH3.5-like [Strongylocentrotus purpuratus]	30.5	1e-35	sp|O81829|GH35_ARATH	Indole-3-acetic acid-amido synthetase GH3.5 OS=Arabidopsis thaliana GN=GH3.5 PE=1 SV=1	40.08	3e-46	H3JKG1	H3JKG1_STRPU Uncharacterized protein OS=Strongylocentrotus purpuratus GN=SPU_027091gn PE=4 SV=1	-	-	-	-	-	-	-	-	-	-
172	CL4292.Contig1_All	121 1707 minus strand hypothetical protein PHYSODRAFT_343583 [Phytophthora sojae]	73988	IAVAIGAPLAVGLAVGAYFYTRKGSEEKPVDEENGSKAKSDGAKPVEEPVQTPAEKAQSSKSKGNKFFKAGQFEKAIKYYSEAIDIAPQENKQDLSTFYQNRAAAQEQLKNFQEVIEDCSKALELNSKYVKALFRRAKAFEMVQEKMKCLEDTTAVCILEGFGHQAGMFLADKMLKELGKEKASQAYKERQPTLPSGQFIRSYFSSFSNDGITSNTESYMEGEDDDSGFLKAVKAFQNGDYTDIIELCTEEIDTNGIFLPPALLMRASFLLLKGQAVEAKPDLDKLIAMEDSDKKLRANALIKRGSMYMQEGNALDAMDVFASAVRIDPDNADIYHHRGQLNLLLEKVDDAVKDFEKCQSLNAEFGLAYAQYCYARYRLAILQQSPMQMQEALKQLEEC…	436	16.4	1	24	24	8	8	1.799	0.915	1.095	21	22	22	*	-	-	CL4292.Contig1_All	66.18	0	gi|390332486|ref|XP_001199474.2|	PREDICTED: mitochondrial import receptor subunit TOM70 [Strongylocentrotus purpuratus]	56.38	4e-153	sp|O94826|TOM70_HUMAN	Mitochondrial import receptor subunit TOM70 OS=Homo sapiens GN=TOMM70A PE=1 SV=1	63.29	0	H3I0F3	H3I0F3_STRPU Uncharacterized protein OS=Strongylocentrotus purpuratus GN=SPU_007464gn PE=4 SV=1	mll2209	82.4	2e-15	COG0457	FOG: TPR repeat	R	General function prediction only ;	K08464|1|3e-29|130|ssc:100523641|G protein-coupled receptor 128!K09553|2|8e-13|75.9|api:100167947|stress-induced-phosphoprotein 1!K09527|3|1e-12|75.1|aga:AgaP_AGAP008985|DnaJ homolog subfamily C member 7!K04460|4|4e-12|73.6|spu:592155|protein phosphatase 5 [EC:3.1.3.16]	-	-
173	Unigene25590_All	982 1986 hypothetical protein PHYSODRAFT_297885 [Phytophthora sojae]	46221	NDFSVHRIIGRGGFGEVYGCRKADTGKMYAMKCLDKKRIKMKQGETLALNERIMLSLVSEVDSPFIVCMTYAFQTPDKLCFILDLMNGGDLHYHLSQHGVFSEKEVQFYAAEIILGLEHMHSRFVVYRDLKPANILLDENGHVRISDLGLACDFSKRKPHASVGTHGYMAPEVLSKGTAYDSSADWFSFGCMLYKLLKGHSPFRQHKTKDKHEIDRMTLTMDVEFPDTMSPEMKSLLQGLLKREVTDRLGCRGGNAEELKEHPFFSGIDWNLVYYQKYTPPLQPPRGEVNAADAFDIGSFDEEDTRGIKLTEADQELYKDFPLVISERWQQEISE	29	2.4	-	2	2	1	1	---	---	---	1	1	1	-	-	-	Unigene25590_All	91.96	1e-107	gi|22477868|gb|AAH36797.1|	ADRBK2 protein [Homo sapiens]	87.46	3e-179	sp|P26818|ARBK2_BOVIN	Beta-adrenergic receptor kinase 2 OS=Bos taurus GN=ADRBK2 PE=2 SV=1	91.96	4e-107	Q8N433	Q8N433_HUMAN ADRBK2 protein OS=Homo sapiens GN=ADRBK2 PE=2 SV=1	SPAC17G8.14c_2	185	1e-46	COG0515	Serine/threonine protein kinase	RTKL	General function prediction only ; Signal transduction mechanisms ; Transcription ; Replication, recombination and repair ;	K00910|1|7e-180|629|aag:AaeL_AAEL006868|beta-adrenergic-receptor kinase [EC:2.7.11.15]	GO:0006468//protein phosphorylation;GO:0031623//receptor internalization;GO:0038032//termination of G-protein coupled receptor signaling pathway	GO:0047696//beta-adrenergic receptor kinase activity;GO:0005543//phospholipid binding;GO:0004703//G-protein coupled receptor kinase activity;GO:0005524//ATP binding	-
174	CL9354.Contig3_All	74 1420 PREDICTED: calcium uptake protein 1, mitochondrial-like [Cucumis sativus]	62182	TSVNNGASRKLWTIGVLSGATAVGGGSFLLLYNKKVTGSRSDVASLISNVKHRPTPMLWEPTQQHRKVACKSTAATSGSTTSVGRFAIGQIVQAREGKDNKPEEYPLTAREERFNSFASLKYDGQIYMTMQDFLESIVDEDPRPRIGRFLLSKAQVDKKLANTPSRRRKTKYLFRDIMDQGILSYTEYLFLLCILTKPKAGYEIAFKMFDRDGNKRIDRREFLLMEEIFRKKSLSRKGGDEDDSVSLLSKFYDVPDSELHIQETTLLRYFFGSKGKDTLDYDTFASFMDNLQSEVLELEFQEQSKGMPTISEVEFAKAIFKYTNLDDEEIEDYLDMVRERTQEEKGITFEQFKDFFQFVNNLDDFEIVLRMYSFADQPMSEDEFRRAVLVTTGHQLADH…	43	7.8	-	4	4	4	4	---	---	---	1	1	1	-	-	-	CL9354.Contig3_All	63.98	2e-49	gi|390366457|ref|XP_003731050.1|	PREDICTED: EF-hand domain-containing family member A2-like, partial [Strongylocentrotus purpuratus]	43.86	2e-83	sp|Q86XE3|EFHA2_HUMAN	EF-hand domain-containing family member A2 OS=Homo sapiens GN=EFHA2 PE=2 SV=1	72.57	2e-37	H3J2P3	H3J2P3_STRPU Uncharacterized protein OS=Strongylocentrotus purpuratus GN=SPU_020780gn PE=4 SV=1	-	-	-	-	-	-	-	K15105|1|1e-10|68.6|tgu:100225577|solute carrier family 25 (mitochondrial aspartate/glutamate transporter), member 12/13	-	-
175	Unigene14627_All	96 317 minus strand calmodulin 2 [Euglena gracilis]	10354	QQQRESRDIFQLFDKKGDGKIDTHQIGDVCRALGLNPSQDVIQRVVEQVDDDRNGARISFQEFQPIFASVSKEK	30	10.8	-	1	1	1	1	---	---	---	1	1	1	-	-	-	Unigene14627_All	56.45	3e-12	gi|196014026|ref|XP_002116873.1|	expressed hypothetical protein [Trichoplax adhaerens] >gi|190580591|gb|EDV20673.1| expressed hypothetical protein [Trichoplax adhaerens]	46.88	2e-09	sp|Q40642|CML1_ORYSI	Calmodulin-like protein 1 OS=Oryza sativa subsp. indica GN=CML1 PE=1 SV=1	56.45	1e-11	B3S9B3	B3S9B3_TRIAD Putative uncharacterized protein OS=Trichoplax adhaerens GN=TRIADDRAFT_60842 PE=4 SV=1	SPAC3A12.14	52.4	2e-07	COG5126	Ca2+-binding protein (EF-Hand superfamily)	TZDR	Signal transduction mechanisms ; Cytoskeleton ; Cell cycle control, cell division, chromosome partitioning ; General function prediction only ;	K12752|1|3e-13|73.9|tad:TRIADDRAFT_60842|myosin light chain, invertebrate	GO:0009792//embryo development ending in birth or egg hatching;GO:0033205//cell cycle cytokinesis	-	-
176	CL249.Contig1_All	254 2356 TPA: hypothetical protein ZEAMMB73_728465 [Zea mays]	98811	MSVSLTINKVNPPVAALLAIEHLDGSVTANVEQGKATSLKLSDDLTFTTPVAICRYLARLAPSSGLYGNNILEATEIDHWLEYSVNRLGNPTEFKDAVSDLDHILGPRTYLVAHGLTIADFAVWGALRANPSWSSKNDSHVNLSRWYNFLDSQEKFQKVSCLLPKKEEKQGSTKTSDVGTFIELPGAKMGEVVVRFPPEASGYLHIGHAKAALLNQYYQQAFKGKLIMRFDDTNPAKESSEFEQVILEDLKLLDIKPDLFTHTSDHFDRMITIAEDLIKSSKAYVDDTDPEEMKRQRDLREESKNRNNSVEKNLQLWSEMKKGSEVGQKCALRMKMDMKSNNGCMRDPTIYRCKLEAHVRCGDKYKAYPTYDFACPIVDSLEGVTHALRTTEYHDRDDQ…	425	15.5	-	22	22	9	9	0.998	0.825	0.987	20	20	19	-	-	-	CL249.Contig1_All	74.39	3e-66	gi|340387203|ref|XP_003392097.1|	PREDICTED: bifunctional aminoacyl-tRNA synthetase-like, partial [Amphimedon queenslandica]	61.17	0	sp|Q8CGC7|SYEP_MOUSE	Bifunctional glutamate/proline--tRNA ligase OS=Mus musculus GN=Eprs PE=2 SV=4	65.78	0	H2MIU6	H2MIU6_ORYLA Uncharacterized protein (Fragment) OS=Oryzias latipes GN=EPRS PE=3 SV=1	SPAC17A5.15c	592	7e-169	COG0008	Glutamyl- and glutaminyl-tRNA synthetases	J	Translation, ribosomal structure and biogenesis ;	K14163|1|0.0|986|bfo:BRAFLDRAFT_117885|bifunctional glutamyl/prolyl-tRNA synthetase [EC:6.1.1.17 6.1.1.15]	GO:0006433//prolyl-tRNA aminoacylation;GO:0006424//glutamyl-tRNA aminoacylation	GO:0004827//proline-tRNA ligase activity;GO:0004818//glutamate-tRNA ligase activity;GO:0005524//ATP binding	GO:0005737//cytoplasm
177	CL1610.Contig2_All	523 1806 uncharacterized protein LOC100274386 [Zea mays]	55708	VTIKKCEDNEYPSLESDESYSLAVGDANSSIIADTIWGGLSGLETFSQLTYYNNDGMLVINKTTIQDSPRFSHRGLLVDTSRHFIKVPILLQNLDAMAYNKLNVFHWHIVDMQAFPYESINFPSLSETGAYSPSHVYTQEDVALVIEYARLRGIRVMPEFDTPGHTFNSWGSIKDLLTPCYSGDKPDGTFGPVNPTLNSTYDFLKSFMQEITSVFPDHYIHLGGDEVNFKCWQSNPQITDFMKAQGFGSDYSKLEEYYEQKLLDIMSDLNSGYAVWQEVIDNNVKVRSDTVVEVWKTPYPGEMSAVTKKGYRTILSTPWYLNYLKSPYSNDWKDFYVVDPLLFNGTDAQKKLVIGGEVCMWGEFVDGTNLIPRLWPRASAVSERLWSPQSVTSLDDAKI…	1087	29.7	-	49	16	10	3	1.083	1.316	1.41	13	13	13	-	-	*	CL1610.Contig2_All	67.53	2e-175	gi|72098985|ref|XP_799340.1|	PREDICTED: beta-hexosaminidase subunit beta [Strongylocentrotus purpuratus]	59.29	3e-152	sp|P07686|HEXB_HUMAN	Beta-hexosaminidase subunit beta OS=Homo sapiens GN=HEXB PE=1 SV=3	64.11	5e-106	F6SFS1	F6SFS1_CALJA Uncharacterized protein OS=Callithrix jacchus GN=HEXA PE=4 SV=1	CC0447	175	1e-43	COG3525	N-acetyl-beta-hexosaminidase	G	Carbohydrate transport and metabolism ;	K12373|1|3e-176|618|spu:594823|hexosaminidase [EC:3.2.1.52]	GO:0030207//chondroitin sulfate catabolic process;GO:0019953//sexual reproduction;GO:0030214//hyaluronan catabolic process;GO:0051179//localization;GO:0007610//behavior;GO:0005975//carbohydrate metabolic process;GO:0006687//glycosphingolipid metabolic process;GO:0048869//cellular developmental process;GO:0016043//cellular component organization;GO:0050877//neurological system process;GO:0048609//…	GO:0004563//beta-N-acetylhexosaminidase activity;GO:0046982//protein heterodimerization activity;GO:0042803//protein homodimerization activity	GO:0043202//lysosomal lumen
178	Unigene2654_All	1 362 LEN=362; translated	17027	XNFTIGDTAKIKFGLDIEVDRKLTSRTVRGENLWKLGAWMSPNEDGSGPKFSHNENVFTELDAAKEYSKPDYPPWDWQKLRHTLMFSGGTCDDFKYFCVEFGEADDPLPTYDLPFTMGPLY	50	17.4	-	3	3	2	2	1.119	0.874	1.164	2	2	2	-	-	-	Unigene2654_All	36.67	6e-06	gi|1143585|emb|CAA61929.1|	2 alpha fibrillar collagen [Paracentrotus lividus]	-	-	-	-	34.78	7e-06	H3JHF2	H3JHF2_STRPU Uncharacterized protein OS=Strongylocentrotus purpuratus GN=SPU_026008gn PE=4 SV=1	-	-	-	-	-	-	-	-	-	-
179	CL3739.Contig1_All	940 1386 minus strand hypothetical protein GUITHDRAFT_72699 [Guillardia theta CCMP2712]	17589	PACLGICDNCYNGGICDDISGRCVCAPGFSGPNCLLGCGGNSFGRDCEMQCNDTSQSQDACRGTLFCLPDPYGCSCGPGFKSLNCTQECDTGYFGAGCLQPCRCQSGTCDRFTGRCLPSDSVNSTACHDGWIGVTCQIPEVCDRGYYGD	24	12.8	-	1	1	1	1	---	---	---	1	1	1	-	-	-	CL3739.Contig1_All	54.32	8e-16	gi|198437090|ref|XP_002123619.1|	PREDICTED: tyrosine-protein kinase receptor Tie-1-like [Ciona intestinalis]	50	8e-24	sp|O73791|TIE2_DANRE	Tyrosine-protein kinase receptor Tie-2 OS=Danio rerio GN=tie2 PE=2 SV=1	68.57	3e-06	H3IT39	H3IT39_STRPU Uncharacterized protein OS=Strongylocentrotus purpuratus GN=SPU_017353gn PE=4 SV=1	-	-	-	-	-	-	-	K01104|1|1e-34|145|spu:578045|protein-tyrosine phosphatase [EC:3.1.3.48]!K05121|2|1e-31|134|gga:427368|endothelial-specific receptor tyrosine kinase [EC:2.7.10.1]	GO:0016525//negative regulation of angiogenesis;GO:0010595//positive regulation of endothelial cell migration;GO:0070374//positive regulation of ERK1 and ERK2 cascade;GO:2000251//positive regulation of actin cytoskeleton reorganization;GO:0018108//peptidyl-tyrosine phosphorylation;GO:0045766//positive regulation of angiogenesis;GO:0043552//positive regulation of phosphatidylinositol 3-kinase acti…	GO:0004713//protein tyrosine kinase activity;GO:0005515//protein binding	GO:0009986//cell surface;GO:0016324//apical plasma membrane;GO:0009925//basal plasma membrane;GO:0005884//actin filament;GO:0045121//membrane raft;GO:0005887//integral to plasma membrane;GO:0005911//cell-cell junction;GO:0001725//stress fiber;GO:0005902//microvillus
180	CL2994.Contig2_All	92 1663 uncharacterized protein LOC100382642 [Zea mays]	72808	PLRMTATPLKKRVCYYYDGDIGNYYYGQGHPMKPHRIRMTHNLILNYGLYRKMEIYRPHKAVMEEMTKYHSDDYIKFLRTIRPDNMPEYTKQMQRFNVGEDCPVFDGLYEFCQLSGGGSVAGAVKLNKQQTDIAVNWAGGLHHAKKSEASGFCYVNDIVLAILELLKYHQRVLYIDIDIHHGDGVEEAFYTTDRVMTVSFHKYGEYFPGTGDLRDIGAGKGKYYAVNFPLRDGIDDESYEKIFKPIMSKVMEMYQPSAIVLQCGADSLSGDRLGCFNLTLKGHAKSVEFMKQYNLPLLLLGGGGYTIRNVARCWTFETAVALGVDIANELPYNDYFEYFGPDFKLHISPSNMTNQNTSEYMDKIKTRLYENLRMIPHAPGVQMQPIPEDAIPEAKEEEE…	55	4.8	-	2	2	2	2	0.581	1.635	1.346	2	2	2	-	-	-	CL2994.Contig2_All	93.64	2e-154	gi|262301931|gb|ACY43558.1|	histone deacetylase [Scolopendra polymorpha]	86.8	0	sp|P70288|HDAC2_MOUSE	Histone deacetylase 2 OS=Mus musculus GN=Hdac2 PE=1 SV=1	93.64	6e-154	D0ULE2	D0ULE2_SCOPO Histone deacetylase (Fragment) OS=Scolopendra polymorpha PE=2 SV=1	YNL330c	571	1e-162	COG0123	Deacetylases, including yeast histone deacetylase and acetoin utilization protein	BQ	Chromatin structure and dynamics ; Secondary metabolites biosynthesis, transport and catabolism ;	K06067|1|0.0|733|spu:373339|histone deacetylase 1/2 [EC:3.5.1.98]	GO:0007179//transforming growth factor beta receptor signaling pathway;GO:0021766//hippocampus development;GO:0043524//negative regulation of neuron apoptotic process;GO:0010870//positive regulation of receptor biosynthetic process;GO:0008284//positive regulation of cell proliferation;GO:0070933//histone H4 deacetylation;GO:0070932//histone H3 deacetylation;GO:0042475//odontogenesis of dentin-con…	GO:0003700//sequence-specific DNA binding transcription factor activity;GO:0033613//activating transcription factor binding;GO:0097372//NAD-dependent histone deacetylase activity (H3-K18 specific);GO:0001106//RNA polymerase II transcription corepressor activity;GO:0046969//NAD-dependent histone deacetylase activity (H3-K9 specific);GO:0001103//RNA polymerase II repressing transcription factor bin…	GO:0005829//cytosol;GO:0016581//NuRD complex;GO:0000792//heterochromatin;GO:0005667//transcription factor complex;GO:0016580//Sin3 complex;GO:0005730//nucleolus;GO:0043025//neuronal cell body
181	Unigene12079_All	103 672 minus strand predicted protein [Populus trichocarpa] >gi|118489001|gb|ABK96308.1| unknown [Populus trichocarpa x Populus deltoides] >gi|222863722|gb|EEF00853.1| predicted protein [Populus trichocarpa]	25462	MEFLIGIQGEDFVLVASDMTAARSVFLLKHDQDKMFELSSKLLMLCVGEAGDTVQFAEYIQKNMQLYKIRNGYELSPKAAANFTRKNLADFLRSRTPYMVNMLLAGHDDQDGPSLFYMDYLASLQQVPYAAHGYGSFFTMSVIDRLYKPGLSKDEAQSILQKCLDEVQRRFIINLPMFQVRIIDKDGVHQ	64	6.3	-	3	3	2	2	0.94	0.903	0.781	2	3	3	-	-	-	Unigene12079_All	88.37	2e-15	gi|183212415|gb|ACC54870.1|	proteasome subunit beta type 2 [Xenopus borealis]	68.25	6e-74	sp|P49721|PSB2_HUMAN	Proteasome subunit beta type-2 OS=Homo sapiens GN=PSMB2 PE=1 SV=1	78.15	2e-49	G3NDU6	G3NDU6_GASAC Uncharacterized protein OS=Gasterosteus aculeatus GN=PSMB2 PE=3 SV=1	SPAC31A2.04c	203	1e-52	COG0638	20S proteasome, alpha and beta subunits	O	Posttranslational modification, protein turnover, chaperones ;	K02734|1|9e-88|322|spu:588670|20S proteasome subunit beta 4 [EC:3.4.25.1]	GO:0051603//proteolysis involved in cellular protein catabolic process	GO:0004298//threonine-type endopeptidase activity	GO:0005737//cytoplasm;GO:0005839//proteasome core complex;GO:0005634//nucleus
182	CL5597.Contig1_All	148 1032 hypothetical protein THAOC_11160 [Thalassiosira oceanica]	40583	LVHAVAGATGSTVAMTVFFPLDTARTRLQLDDKRQAQHTPVVIAEILKEEGMSSLYRGWRPVITSLWLSNFVYFYTFNGLKLFLVDSMRTRKALKDLLMGISAGIVNVLSTTPMWVVNTRLKMQGVHFKTERIEKKKFPKYSGIIDAFQKIISQEGVSTLWSGTVSSLALVINPALHFMIYESLKRYYSRLTKGATPSALHFFIIGAIAKTLSTTATYPLQVIQSKLRYGRDNTEDGEKKPTMLDIFKYILQTQGRNGFYKGLETKLVQTVLTAALMFVCYEKIAAFIFRILGAK	20	3.4	-	1	1	1	1	---	---	---	-	-	-	-	-	-	CL5597.Contig1_All	66.55	1e-116	gi|390353209|ref|XP_783345.2|	PREDICTED: peroxisomal membrane protein PMP34-like [Strongylocentrotus purpuratus]	55.85	1e-84	sp|O43808|PM34_HUMAN	Peroxisomal membrane protein PMP34 OS=Homo sapiens GN=SLC25A17 PE=1 SV=1	65.06	2e-101	H3HMZ3	H3HMZ3_STRPU Uncharacterized protein OS=Strongylocentrotus purpuratus GN=SPU_003033gn PE=3 SV=1	-	-	-	-	-	-	-	K13354|1|5e-93|340|spu:578063|solute carrier family 25 (peroxisomal adenine nucleotide transporter), member 17	GO:0015908//fatty acid transport;GO:0035349//coenzyme A transmembrane transport;GO:0001561//fatty acid alpha-oxidation;GO:0015867//ATP transport;GO:0006635//fatty acid beta-oxidation;GO:0043132//NAD transport;GO:0015866//ADP transport;GO:0080121//AMP transport;GO:0035350//FAD transmembrane transport	GO:0080122//AMP transmembrane transporter activity;GO:0015217//ADP transmembrane transporter activity;GO:0051087//chaperone binding;GO:0051724//NAD transporter activity;GO:0015228//coenzyme A transmembrane transporter activity;GO:0005347//ATP transmembrane transporter activity;GO:0015230//FAD transmembrane transporter activity	GO:0005779//integral to peroxisomal membrane;GO:0005739//mitochondrion
183	CL9065.Contig1_All	147 1064 minus strand conserved unknown protein [Ectocarpus siliculosus] >CL9065.Contig2_All 1720 2637 minus strand conserved unknown protein [Ectocarpus siliculosus]	35957	GDPHIITLDNANFTFNGKGEYTLLEVDSESFRLDGRFEVIPAFSSGVNQQDGATGITAVVMLDDYSDVLHVEKNNLAGLALYRGEHTDLAVTDWERIVFRDQTWLDLPGVSVTINNNFESDQMITSLTVMFMESRIGVNVTSEEDQNNLAISVILPPDLKGSSGVRGMLGNYNDDPDDDLRSRSGSVLDPNTASEEEIYAAGLTWETVYRMLFRYSGGKTHADYQNSTVYDPVLVAPDESSLSSFEQSTMENTCGDVDQCRFDYLVTRDQDLASSTATVVEHYYWADDVMTKITSCPFFNTPRNGS	23	4.9	-	1	1	1	1	---	---	---	-	-	-	-	-	-	CL9065.Contig1_All	44.59	2e-06	gi|291232323|ref|XP_002736107.1|	PREDICTED: fibrillin 2-like, partial [Saccoglossus kowalevskii]	30.77	3e-25	sp|Q9UGT4|SUSD2_HUMAN	Sushi domain-containing protein 2 OS=Homo sapiens GN=SUSD2 PE=1 SV=1	49.21	4e-07	I1FM43	I1FM43_AMPQE Uncharacterized protein OS=Amphimedon queenslandica PE=4 SV=1	-	-	-	-	-	-	-	-	-	-
184	Unigene34473_All	22 336 minus strand hypothetical protein GUITHDRAFT_135847 [Guillardia theta CCMP2712]	14951	CERGWQKFDMDSSYCFNNVRKSWNEASEFCSGINSHLVWIESEKENDFLKLSLFAENPAGRVWIGMDDIEEEGVWKFDGSDTLPTYTNWRKTEPNNNKNEDCAMI	147	40	-	7	7	3	3	2.188	0.904	0.459	4	4	4	*	-	-	Unigene34473_All	42.06	6e-13	gi|301608736|ref|XP_002933953.1|	PREDICTED: hepatic lectin-like [Xenopus (Silurana) tropicalis]	38.68	1e-10	sp|Q6ZS10|CL17A_HUMAN	C-type lectin domain family 17, member A OS=Homo sapiens GN=CLEC17A PE=1 SV=2	42.06	5e-12	F7CSY8	F7CSY8_XENTR Uncharacterized protein (Fragment) OS=Xenopus tropicalis GN=clec4e PE=4 SV=1	-	-	-	-	-	-	-	K06563|1|6e-12|69.3|ptr:455661|CD209 antigen	GO:0009987//cellular process;GO:0006810//transport;GO:0022610//biological adhesion;GO:0044699//single-organism process;GO:0002376//immune system process;GO:0019048//virus-host interaction	GO:0005488//binding	GO:0016021//integral to membrane;GO:0044464//cell part
185	CL4601.Contig2_All	94 411 Aryl sulfotransferase [Ectocarpus siliculosus]	15569	IKKMVIRSSDVIIVTWPKSGTTWLQFIVSQIFRGQESDEMVPFFEEHFFLEMAQNFPSSDVGEGVYKIAVDAPSPRFLKSHLLLKFLPEELTTKKPKVIYVARNPK	52	8.5	-	2	2	1	1	1.993	0.593	0.201	2	2	2	-	-	-	CL4601.Contig2_All	48.54	8e-20	gi|390360907|ref|XP_782779.3|	PREDICTED: sulfotransferase 1C4-like [Strongylocentrotus purpuratus]	44.12	3e-11	sp|O75897|ST1C4_HUMAN	Sulfotransferase 1C4 OS=Homo sapiens GN=SULT1C4 PE=1 SV=2	53.97	7e-11	H3IWY4	H3IWY4_STRPU Uncharacterized protein OS=Strongylocentrotus purpuratus GN=SPU_018728gn PE=4 SV=1	-	-	-	-	-	-	-	K01014|1|1e-13|75.1|ptr:739600|aryl sulfotransferase [EC:2.8.2.1]	-	-
186	Unigene16239_All	532 954 LEN=954; minus strand; translated	18806	LVGKWKLDRSENFEDYMVALGVSLPIRKAALIMPSPTCEITNPADNAFVIKMNVPVIMTHVQDFVIGQPFEDLVPNGEKQMTVVSQESDSKLVFAEENPSDPPHVVTREIDGDEMVMTLLKGDVSCKRVFKAFNLSHVSSX	51	16.3	-	3	3	1	1	1.14	0.618	0.774	3	3	3	-	-	-	Unigene16239_All	58.87	2e-33	gi|390358632|ref|XP_003729303.1|	PREDICTED: cellular retinoic acid-binding protein 1-like [Strongylocentrotus purpuratus]	36.36	2e-14	sp|Q5PXY7|RABP2_BOVIN	Cellular retinoic acid-binding protein 2 OS=Bos taurus GN=CRABP2 PE=2 SV=3	58.78	3e-36	H3IJL0	H3IJL0_STRPU Uncharacterized protein OS=Strongylocentrotus purpuratus GN=SPU_014303gn PE=4 SV=1	-	-	-	-	-	-	-	K08752|1|3e-13|73.6|cbr:CBG12713|fatty acid-binding protein 3, muscle and heart!K08754|2|2e-11|67.8|acs:100555334|fatty acid-binding protein 5, epidermal!K08756|3|6e-11|66.2|api:100168295|fatty acid-binding protein 7, brain	GO:0002138//retinoic acid biosynthetic process	GO:0001972//retinoic acid binding	GO:0005829//cytosol
187	Unigene58583_All	1 376 LEN=376; minus strand; translated	17157	XQALDLLKGSPVENEGMSAGTKRADVFQITVDISMNQEKVSQGILSLATFHGADATKQLINNEKNSPLMSLLTPLITDKSCRMAMIVTIKMDTSPETQETLHFIEKMREASEKRWEXPNILQDNQX	134	14.3	-	3	3	1	1	1.074	1.214	1.804	3	3	3	-	-	-	Unigene58583_All	-	-	-	-	-	-	-	-	-	-	-	-	-	-	-	-	-	-	-	-	-	-
188	Unigene15957_All	71 577 minus strand MRP-like ABC transporter [Oryza sativa Japonica Group] >gi|38346012|emb|CAE01891.2| OSJNBa0035O13.14 [Oryza sativa Japonica Group]	22116	AMTTIVTHVLAGGTVTAAEAYALMSLFYGIGVVIYIIPMALKPLSETSIALKRMKVILLMKETTLQYEDPEDEDNAIEVTGGSFCWTERLEEVEISASRENLDEVGTENAKDAKASGAEKLLEQNGTRKHTYMLKDIDLCVPKGQLVGICGAVGSGKSSLLYALLDQME	23	3.6	-	1	1	1	1	---	---	---	-	-	-	-	-	-	Unigene15957_All	38.17	1e-27	gi|390339222|ref|XP_789376.3|	PREDICTED: multidrug resistance-associated protein 5-like [Strongylocentrotus purpuratus]	32.95	8e-19	sp|Q96J65|MRP9_HUMAN	Multidrug resistance-associated protein 9 OS=Homo sapiens GN=ABCC12 PE=1 SV=2	38.17	4e-27	H3HXJ6	H3HXJ6_STRPU Uncharacterized protein OS=Strongylocentrotus purpuratus GN=SPU_006437gn PE=3 SV=1	YLL015w	55.1	5e-08	COG1132	ABC-type multidrug transport system, ATPase and permease components	V	Defense mechanisms ;	K05668|1|3e-20|97.8|bfo:BRAFLDRAFT_256206|ATP-binding cassette, subfamily C (CFTR/MRP), member 5!K05672|2|4e-19|94.0|pon:100461306|ATP-binding cassette, subfamily C (CFTR/MRP), member 12	-	-
189	Unigene4195_All	754 3192 predicted protein [Hordeum vulgare subsp. vulgare]	110643	EAQQMLTDSKTKIEVIRMEILRARMEEGNGGKPETGVPENGTLDSGYGRRGSDRKMSSVEFRIEELRHHQKVESAIVDGFKNAVKFYGLQDKKASEKATRGLTDSSHRLEILQEALKKRVAELPEDSEMYKEIKQELDTGKSKSYSSLPKPAELTGRLEVRLLGCQGLMENIPNRKPQGLSSNSNDGRSLIRSSFHSRGSAKSSNSRTDELSNEVAAVLRLDNQPVGQTSYKPISQQCWDHKISIELDKSRELEISILWKDYRSLNALKFLRLEDFLASEKHSMCLPLEPQGTLFAEIAFFNPSIERRTKLKRQRKIFPKQKGMNFLRPKQMNINVATWGRLMKRHVPTSPSNIGSEGFPSPHAPAPRDRGSIKDYQFSPNVSSTPRPAERRSKPLDTD…	47	2.7	-	3	3	2	2	---	---	---	1	1	1	-	-	-	Unigene4195_All	81.93	6e-156	gi|321477444|gb|EFX88403.1|	hypothetical protein DAPPUDRAFT_305606 [Daphnia pulex]	78.68	1e-149	sp|Q16513|PKN2_HUMAN	Serine/threonine-protein kinase N2 OS=Homo sapiens GN=PKN2 PE=1 SV=1	81.93	2e-151	E9FWM9	E9FWM9_DAPPU Putative uncharacterized protein OS=Daphnia pulex GN=DAPPUDRAFT_305605 PE=4 SV=1	SPAC17G8.14c_2	356	9e-98	COG0515	Serine/threonine protein kinase	RTKL	General function prediction only ; Signal transduction mechanisms ; Transcription ; Replication, recombination and repair ;	K06071|1|0.0|894|spu:582022|protein kinase N [EC:2.7.11.13]	GO:0044238//primary metabolic process;GO:0044260//cellular macromolecule metabolic process	GO:0004672//protein kinase activity	GO:0044424//intracellular part
190	Unigene1798_All	1 1217 LEN=1217; minus strand; translated	52704	XSNPSGQDSTSCSVLVTALEPPPSKPHFPLKLAPEVVISDGEPLALKCKVGGYPLPRAAWYKDGSLIPNEPPYQITFRDGDAALMVPESQEENSGVYSCQATNSSGQESTSSNVIVSAPEPPPSKPHFTSKLPPEFKVPPEEPLLLKCKVSGYPPPKVTWYKDGVQLKNEPHCEITSRNGDNQLKVPDAQEDDGGVYSCLITNPTGQDSTSCNVAVAAPEPPPSKPHFTLKLAANLSFPPGEPIFLRCKVAGYPAPKPTWYKDGIPLKSEPLYDITHRNGECTFKIPESIVEDGGVYSCLAANPSGQETTTTNVVVKAPEPPPSKPHFVTRLSPELNVLGGEPVVLRCKVGGYPIPKLSWFKDSEQLPSEPPYQIENREGEGMLRIPESFEDDGGVYSC…	29	3.9	-	1	1	1	1	---	---	---	1	1	1	-	-	-	Unigene1798_All	42.42	1e-06	gi|339253644|ref|XP_003372045.1|	putative immunoglobulin I-set domain protein [Trichinella spiralis] >gi|316967602|gb|EFV52010.1| putative immunoglobulin I-set domain protein [Trichinella spiralis]	38.64	3e-07	sp|Q5VST9|OBSCN_HUMAN	Obscurin OS=Homo sapiens GN=OBSCN PE=1 SV=3	42.42	4e-06	E5ST68	E5ST68_TRISP Putative immunoglobulin I-set domain protein OS=Trichinella spiralis GN=Tsp_05689 PE=4 SV=1	-	-	-	-	-	-	-	K12567|1|6e-49|195|dre:317731|titin [EC:2.7.11.1]	GO:0031034//myosin filament assembly	GO:0005488//binding	GO:0005622//intracellular
191	CL12846.Contig16_All	310 1539 hypothetical protein AURANDRAFT_53141 [Aureococcus anophagefferens]	53956	PACVVDPGTGYTKLGFAGNTEPQFIIPSAIAIKESAQVGDRSQRRLGKGVDDLDFFIGDEAIDKPNYACKYPVRHGIIEDWDLMERFLEQVIFKYLRAEPEDHYFLLTEPPLNTPENREYLAEIMFESFNVPGLYIAVQAVLALAASWTSRQQGERTLTGTVIDSGDGVTHVIPVAEGYVIGSCIKHIPIAGRDITYFIQQLLRERELGIPPEQSLETAKAIKEKYCYICPDISKEFEKYDTDPVKWIKKHEGANAITKESFAVDVGYERFLGPEIFFHPEFSNPDFTLPISEIVDNVIQNCPIDVRRPLYKNIVLSGGSTMFRDFGRRLKRDVKRIVDARLKLSEQLSGGRLKPKPIETEVISHHMQRYAVWFGGSMLASTPEFYGACHTKAQYDEIG…	1483	31.5	-	69	69	9	9	0.905	0.973	0.928	58	58	59	*	-	*	CL12846.Contig16_All	90.7	3e-83	gi|410932014|ref|XP_003979389.1|	PREDICTED: actin-related protein 3-like, partial [Takifugu rubripes]	86.7	2e-86	sp|Q9C0K3|ARP3C_HUMAN	Actin-related protein 3C OS=Homo sapiens GN=ACTR3C PE=2 SV=1	88.78	0	Q9U5H4	Q9U5H4_HEMPU Sea urchin Arp3 (SUArp3) OS=Hemicentrotus pulcherrimus GN=SUarp3 PE=2 SV=1	SPAC630.03	485	5e-137	COG5277	Actin and related proteins	Z	Cytoskeleton ;	K05692|1|2e-68|260|spu:593068|actin beta/gamma 1!K12314|3|2e-68|259|bfo:BRAFLDRAFT_115565|actin, alpha cardiac muscle!K10354|5|3e-68|259|mcc:100426612|actin, alpha skeletal muscle	GO:0050775//positive regulation of dendrite morphogenesis;GO:0007163//establishment or maintenance of cell polarity;GO:0060271//cilium morphogenesis;GO:0046677//response to antibiotic;GO:0051321//meiotic cell cycle;GO:0006928//cellular component movement;GO:0008356//asymmetric cell division;GO:0043519//regulation of myosin II filament organization;GO:0045666//positive regulation of neuron differe…	GO:0003779//actin binding;GO:0005524//ATP binding	GO:0030056//hemidesmosome;GO:0030027//lamellipodium;GO:0000139//Golgi membrane;GO:0005884//actin filament;GO:0060076//excitatory synapse;GO:0005885//Arp2/3 protein complex;GO:0002102//podosome
192	Unigene26154_All	204 2082 LEN=2335; minus strand; translated	85176	EGGMRLDDMNLQDWTGKNNLIENIFASMDSEPAIPCLVITEQPKPKDHRFRYPCEGRTAGALLGEKSSERKKTCPEVKVENLATRALIVGSLVTKEEDAKPHPFKLVGTNCTEGIVKMVVTASSPKAKFESLGIQCVKKADLKDALLVRKKLQVDPYNNIDQCLEDDMQDLDCKVLRICFQAYLEDPNTGQFTEPLAPVLTHNIYNKKDSNLKIMKMNKREGTAKGGDEVYIFCEKVDKEDIQVVFFEESKESRPWTDNGLFGSSDVHHQIAIVLRTPPYKCTNIEKEIEVKVRLQRTSDSDVSDPEVFTYIPENADPEQLEAKRKRNNPSFEQNFALEDGAAGSSSKLSDIKKKLNEKLKAKGRRQSLKARAQVKPESSFSFPSAADSCNIISVTPDS…	33	1.6	-	1	1	1	1	---	---	---	1	1	1	-	-	-	Unigene26154_All	97.32	0	gi|347954121|gb|AEP33643.1|	NF-kappaB transcription factor Rel [Apostichopus japonicus]	42.43	8e-56	sp|P51510|RELB_XENLA	Transcription factor RelB homolog OS=Xenopus laevis GN=relb PE=2 SV=1	97.32	0	G4XLY1	G4XLY1_STIJA NF-kappaB transcription factor Rel OS=Stichopus japonicus GN=rel PE=2 SV=1	-	-	-	-	-	-	-	K09254|1|9e-63|242|dre:415101|c-Rel proto-oncogene protein!K04735|2|2e-61|238|xla:394353|transcription factor p65!K09253|3|8e-61|235|acs:100558547|transcription factor RelB	-	GO:0046982//protein heterodimerization activity	-
193	CL2517.Contig1_All	134 478 minus strand LOC100285722 [Zea mays] >gi|195652485|gb|ACG45710.1| small nuclear ribonucleoprotein Sm D3 [Zea mays] >gi|413935155|gb|AFW69706.1| Small nuclear ribonucleoprotein Sm D3 [Zea mays]	15360	SIGVPIKVLHEAEGHIVTLETSTGEVYRGKLIEAEDNMNCQMQSITVTYRDGRVAQLEHVFIRGSKIRFLILPDMLKNAPMFKKQPKGAAGRGKSAILRAQVAASRGRGRGERGG	268	21.7	-	16	16	3	3	0.989	0.976	1.174	13	13	13	-	-	-	CL2517.Contig1_All	91.18	5e-47	gi|270008821|gb|EFA05269.1|	hypothetical protein TcasGA2_TC015424 [Tribolium castaneum]	83.81	2e-45	sp|O44437|SMD3_DROME	Small nuclear ribonucleoprotein Sm D3 OS=Drosophila melanogaster GN=SmD3 PE=1 SV=1	91.18	2e-46	D2A4U7	D2A4U7_TRICA Putative uncharacterized protein GLEAN_15424 OS=Tribolium castaneum GN=GLEAN_15424 PE=4 SV=1	SPBC19C2.14	130	8e-31	COG1958	Small nuclear ribonucleoprotein (snRNP) homolog	K	Transcription ;	K11088|1|2e-48|190|tca:661326|small nuclear ribonucleoprotein D3	GO:0006369//termination of RNA polymerase II transcription;GO:0000387//spliceosomal snRNP assembly;GO:0008334//histone mRNA metabolic process;GO:0034660//ncRNA metabolic process	GO:0071208//histone pre-mRNA DCP binding;GO:0019899//enzyme binding	GO:0005829//cytosol;GO:0005683//U7 snRNP;GO:0071013//catalytic step 2 spliceosome;GO:0005654//nucleoplasm;GO:0005689//U12-type spliceosomal complex
194	Unigene25612_All	62 2011 Signal recognition particle subunit srp72, putative [Ricinus communis] >gi|223546023|gb|EEF47526.1| Signal recognition particle subunit srp72, putative [Ricinus communis]	93832	AAKQPKDKITPLYTELNRYKLNEDFSNPRIIAVTSKLLKLNREDAVAFKCKIVCLIHQSDFALAIKEIANNPNLASDLMFEKAYCQYRLNKVPESLKTLRNITEPDDKVKELLGQVLYRLEEYSECLDIYKDLIKNSSDDFDEERGTNLSAVLAALQLWNAQESEDPGLSEENYELSFNKASLLAGKGKFKEALEELDHAEELCKEGLDEEDDEEAELGIIRVQRGYVLQLMGKTDKAMALYNQVVKARPSDIGLLAVASNNIISLNKDQNVFDSKKKIRATQVAGLENKVTKHQQNTLSYNRCLFYLYTNQFENCRKQLKKLKGEDGDTLVMIEAALFTREKRIEKAFETLQDYISKENASIRVKLSLAQLFLSQGHVNKACDVLQALGDDQYAPGVV…	143	7.8	-	6	6	4	4	1.089	0.693	1.074	6	6	6	-	-	-	Unigene25612_All	61.38	0	gi|390359145|ref|XP_003729420.1|	PREDICTED: signal recognition particle 72 kDa protein-like [Strongylocentrotus purpuratus]	46	2e-132	sp|P33731|SRP72_CANFA	Signal recognition particle 72 kDa protein OS=Canis familiaris GN=SRP72 PE=1 SV=3	64.74	2e-57	H3HJS5	H3HJS5_STRPU Uncharacterized protein OS=Strongylocentrotus purpuratus GN=SPU_001889gn PE=4 SV=1	-	-	-	-	-	-	-	K03108|1|2e-132|473|bta:509430|signal recognition particle subunit SRP72	-	-	GO:0044444//cytoplasmic part
195	CL9711.Contig2_All	96 824 minus strand uncharacterized protein LOC100272906 [Zea mays]	29977	MGSNACVSCVKYLMFAFNFLFWLCGCALLGLGLYLCFEPSMRSYAHTSGDLQEYYIALYCLIGIGGLMMLVGFLGCCGACAESRILLGMFFTFLLLICVVEVGGGFYAYLQREELKVLVTDSMTQTIKDVYGEDQVVNEAVDSMQQGLECCGASGPGDWLASKYSNIPESCCIAESCTPPSAVEALSKLFAGDTNVIIYTEGCSSKLFKKLEQHTVILAGLTIGIGVVQLLGMVFSCCLCVAI	53	4.9	1	2	2	1	1	0.852	0.98	0.585	2	2	2	-	-	-	CL9711.Contig2_All	48.51	8e-28	gi|72109953|ref|XP_794210.1|	PREDICTED: CD63 antigen-like [Strongylocentrotus purpuratus]	35.59	4e-14	sp|P30932|CD9_BOVIN	CD9 antigen OS=Bos taurus GN=CD9 PE=2 SV=2	48.51	3e-27	H3JGI0	H3JGI0_STRPU Uncharacterized protein OS=Strongylocentrotus purpuratus GN=SPU_025681gn PE=4 SV=1	-	-	-	-	-	-	-	K06508|1|5e-25|114|dwi:Dwil_GK14385|CD81 antigen	-	-
196	Unigene4387_All	1087 1392 minus strand hypothetical protein GUITHDRAFT_77473, partial [Guillardia theta CCMP2712]	16078	LTTVVLEAKNLKKMDVGGLSDPYVKISLYMNNKRIKKKKTTIKKRTLNPYYNESFGFEVPFEQIQKVTLVVTVVDYDKLGSSEPIGKVTLGCNATGAGLRHW	36	20.6	-	2	2	2	2	0.858	1.308	0.684	2	2	2	-	-	-	Unigene4387_All	94.12	1e-39	gi|260314314|ref|NP_001159462.1|	synaptotagmin I [Strongylocentrotus purpuratus] >gi|75854645|gb|AAB67801.3| synaptotagmin I [Strongylocentrotus purpuratus]	78.43	1e-32	sp|P46096|SYT1_MOUSE	Synaptotagmin-1 OS=Mus musculus GN=Syt1 PE=1 SV=1	94.12	4e-39	O16152	O16152_STRPU Synaptotagmin I OS=Strongylocentrotus purpuratus PE=2 SV=2	YML072c	53.5	8e-08	COG5038	Ca2+-dependent lipid-binding protein, contains C2 domain	R	General function prediction only ;	K15290|1|1e-40|164|spu:373478|synaptotagmin-1	GO:0006810//transport	GO:0016740//transferase activity;GO:0005215//transporter activity	GO:0008021//synaptic vesicle;GO:0016020//membrane
197	Unigene22176_All	186 1151 PREDICTED: 2-oxoisovalerate dehydrogenase subunit beta, mitochondrial-like [Cucumis sativus] >gi|449493568|ref|XP_004159353.1| PREDICTED: 2-oxoisovalerate dehydrogenase subunit beta, mitochondrial-like [Cucumis sativus]	39875	MNLFQSLTNAMDIALATDQTTVIFGEDVAFGGVFRCTVGLSDKYGKDRVFNTPLCEQGIVGFGIGMAAVGATTIAEIQFADYIFPAYDQIVNEAAKFRYRSGNLFNVGGLTIRAPWGAVGHGALYHSQSPEAAFASCPGLKVVVPRSPIQAKGLLLACIRDRNPCIFFEPKVLYRAAVEEVPVQDYMVPLSQADVLLEGSDITLVGWGTQIHVLWEVAEMAKEQLGVSCEVIDLQTILPWDQDTIIKSVQKTGRLLIAHEAPITGGFAGEIAATIQEECFLHLECPVQRVCGWDTPFPHVFEPFYMPTKWRCFDAIKKAINY	29	3.4	-	1	1	1	1	---	---	---	1	1	1	-	-	-	Unigene22176_All	87.2	7e-58	gi|344238942|gb|EGV95045.1|	2-oxoisovalerate dehydrogenase subunit beta, mitochondrial [Cricetulus griseus]	78.57	5e-157	sp|P21953|ODBB_HUMAN	2-oxoisovalerate dehydrogenase subunit beta, mitochondrial OS=Homo sapiens GN=BCKDHB PE=1 SV=2	80.57	2e-116	F1NXT5	F1NXT5_CHICK Uncharacterized protein (Fragment) OS=Gallus gallus GN=BCKDHB PE=4 SV=1	BMEII0747	316	3e-86	COG0022	Pyruvate/2-oxoglutarate dehydrogenase complex, dehydrogenase (E1) component, eukaryotic type, beta subunit	C	Energy production and conversion ;	K00167|1|1e-157|555|mgp:100546491|2-oxoisovalerate dehydrogenase E1 component, beta subunit [EC:1.2.4.4]	GO:0055114//oxidation-reduction process;GO:0007584//response to nutrient;GO:0034641//cellular nitrogen compound metabolic process;GO:0009083//branched-chain amino acid catabolic process;GO:0051384//response to glucocorticoid stimulus;GO:0051591//response to cAMP	GO:0003826//alpha-ketoacid dehydrogenase activity;GO:0003863//3-methyl-2-oxobutanoate dehydrogenase (2-methylpropanoyl-transferring) activity;GO:0032403//protein complex binding;GO:0016831//carboxy-lyase activity	GO:0005743//mitochondrial inner membrane;GO:0005947//mitochondrial alpha-ketoglutarate dehydrogenase complex
198	Unigene11683_All	265 2064 unnamed protein product [Vitis vinifera]	84973	MADKLTRIAIVSTDKCKPKRCRQECKKSCPVVRMGKLCIEVTPTDKLAFISEKLCIGCGICIKKCPFEAICIINLPKNLEKDTTHRYNANSFKLHRLPTPRPGEVLGLVGTNGIGKSTALKILAGKLKPNLGQFKLPPDWEKILLFFRGSELQNYFTKILEDDLKAIIKPQYVDQIPKAVKGTVQAILDKKDETNTQETVCQELDLQKVKGRNVEDLSGGELQRFAIAVVCIQKSDIYMFDEPSSYLDVKQRLKAALSIRNLIDSDKYIIVVEHDLSVLDYLSDFICCLYGEPGAYGVVTMPFSVREGINIFLDGYVPTENLRFRETSLVFKVSETAEEEEIKRMAHYKYPAMSKTLGDFHLDIKAGEFSDSEIIVMLGENGTGKTTFIRMLAGRLAPD…	69	2.7	-	3	3	2	2	---	---	---	1	1	1	-	-	-	Unigene11683_All	85.71	3e-47	gi|226479026|emb|CAX73008.1|	ATP-binding cassette, sub-family E (OABP), member 1 [Schistosoma japonicum]	81	0	sp|P61222|ABCE1_MOUSE	ATP-binding cassette sub-family E member 1 OS=Mus musculus GN=Abce1 PE=2 SV=1	82.62	0	H3ITF3	H3ITF3_STRPU Uncharacterized protein OS=Strongylocentrotus purpuratus GN=SPU_017469gn PE=4 SV=1	YDR091c	854	0	COG1245	Predicted ATPase, RNase L inhibitor (RLI) homolog	R	General function prediction only ;	K06174|1|0.0|998|phu:Phum_PHUM105900|ATP-binding cassette, sub-family E, member 1	GO:0009615//response to virus;GO:0006401//RNA catabolic process;GO:0006200//ATP catabolic process;GO:0019048//virus-host interaction	GO:0015416//organic phosphonate transmembrane-transporting ATPase activity;GO:0046872//metal ion binding;GO:0009055//electron carrier activity;GO:0051539//4 iron, 4 sulfur cluster binding;GO:0005524//ATP binding;GO:0008428//ribonuclease inhibitor activity	GO:0005739//mitochondrion
199	Unigene60852_All	1 306 LEN=306; translated	13233	XPLVVEKLGCAEFKYLCVEFRKGDSANPDYTAEFTQSEVEIGSADDDVIFTGDSLVHCREEKCPGTGKEPAXGGFPDNPSSWLLNISLSYITSQLTSVAEVLE	20	6.8	-	2	2	1	1	---	---	---	-	-	-	-	-	-	Unigene60852_All	35.94	6e-06	gi|390347052|ref|XP_780851.3|	PREDICTED: uncharacterized protein LOC575353 [Strongylocentrotus purpuratus]	-	-	-	-	-	-	-	-	-	-	-	-	-	-	-	-	-	-
200	CL4031.Contig1_All	193 1622 LEN=2140; minus strand; translated	70595	PDQNAEFAMDSQKSFWEVHQYRRTVKRLEDGYETCNKLMLLLQERAEIEKKYAKSLKQWSTKWHGIIDKGPEYGTNKSAWKATLTEAERRHDVHRDICTRLNGEVVASIKNWQKENYHKKMMNGFKEVIDLDEGFRKAQKQWAVLLKKTQQSQKTYYNCCKAEKTAELQEKAAEGDTTLSPDQVKKIQDKRDKSTHDTNKTKDKYESCLEDINEHNPRYIEDMTVQFKKAQDYERKRLQFFKEALIAAHKVLDLSVNDKFSAIYTDFMNTLRSSDCEKDLKWWSANHGVNMAMNWPNFEEYSEQVHAITKKSSKGNVGGSGGEGVVVASFKSTSEFSNQDYNDPTYNTNSHQRWSSSNSYGWDSSPNVERPASPEEEQNDFEYDAEEEQEDFASKPGVQ…	180	10.1	1	13	13	5	5	1.086	1.21	1.186	11	11	11	-	-	*	CL4031.Contig1_All	78.18	7e-20	gi|195113097|ref|XP_002001105.1|	GI10597 [Drosophila mojavensis] >gi|193917699|gb|EDW16566.1| GI10597 [Drosophila mojavensis]	64.06	3e-16	sp|Q9UNF0|PACN2_HUMAN	Protein kinase C and casein kinase substrate in neurons protein 2 OS=Homo sapiens GN=PACSIN2 PE=1 SV=2	78.18	3e-19	B4K8W9	B4K8W9_DROMO GI10597 OS=Drosophila mojavensis GN=GI10597 PE=4 SV=1	-	-	-	-	-	-	-	K10408|1|2e-85|317|tca:664324|dynein heavy chain, axonemal!K12804|3|1e-09|65.1|dre:571331|proline-serine-threonine phosphatase interacting protein 1!K04705|4|2e-09|64.7|xtr:394846|signal transducing adaptor molecule	-	GO:0005515//protein binding	GO:0005737//cytoplasm
201	CL62.Contig2_All	209 829 minus strand hypothetical protein ARALYDRAFT_476670 [Arabidopsis lyrata subsp. lyrata] >gi|297334859|gb|EFH65277.1| hypothetical protein ARALYDRAFT_476670 [Arabidopsis lyrata subsp. lyrata]	30758	ITLYIKGGVNHTVGDCPLCQRVYMVLKLKDLNFRVMAINTKAPPQEYKAIAGPKKPPILVDGEAVYFDLAEMVDYLDASYQKSLQPKDKETHNVGIEVFIALSKYLKNKDDTKNEKLKTNLMKKLLTINDALEINGGPFLDGEVMTLPDCNLLPKLYHVEVCGRRISEKGYVIPEAMTNIHRYLDAFKNSEVFEETKVEESEIEYGW	306	25.1	-	20	20	5	5	0.814	1.148	0.921	13	13	13	-	-	-	CL62.Contig2_All	37.84	8e-25	gi|291239925|ref|XP_002739882.1|	PREDICTED: chloride intracellular channel protein 5-like [Saccoglossus kowalevskii]	33.5	8e-19	sp|Q9Z0W7|CLIC4_RAT	Chloride intracellular channel protein 4 OS=Rattus norvegicus GN=Clic4 PE=1 SV=3	35.11	9e-23	B3RWE0	B3RWE0_TRIAD Putative uncharacterized protein OS=Trichoplax adhaerens GN=TRIADDRAFT_56715 PE=4 SV=1	-	-	-	-	-	-	-	K05022|1|1e-24|112|spu:754232|chloride intracellular channel 2!K05024|4|2e-21|102|bfo:BRAFLDRAFT_90113|chloride intracellular channel 4	-	-
202	Unigene26171_All	155 676 LEN=885; minus strand; translated	21960	MDDTKIQADLPATPTKERRRSRTNSRVHFPEDVHDSQIQASHEYNAMIDVNLGFLQTHHIYEVQFTVRDSVTGPVTASIDRQVIVKSIEAFPTQDGTGHDVILTVLGHKDGIINESFKLTSQSDPNQKVTVMLHTKVLGKDQGTPLLKDGIHLVGTEGGDEASESSDASTAAE	50	13.3	-	2	2	1	1	1.13	0.948	1.204	2	2	2	-	-	-	Unigene26171_All	44.76	1e-27	gi|390335998|ref|XP_003724261.1|	PREDICTED: UPF0687 protein C20orf27 homolog isoform 2 [Strongylocentrotus purpuratus] >gi|390336000|ref|XP_001179748.2| PREDICTED: UPF0687 protein C20orf27 homolog isoform 1 [Strongylocentrotus purpuratus]	30	1e-10	sp|Q68FA2|CT027_XENTR	UPF0687 protein C20orf27 homolog OS=Xenopus tropicalis PE=2 SV=1	34.78	1e-11	G3MMS5	G3MMS5_9ACAR Putative uncharacterized protein OS=Amblyomma maculatum PE=2 SV=1	-	-	-	-	-	-	-	-	-	-
203	Unigene22931_All	1 444 LEN=444; translated	21184	XEEDRAQLDEEDRGQLAEEDRAQLAEGSRKGDLEWEPSKFSPTNGPGSRAHLTLAVREKVHPLQTGLDLKEIIKKEVEDQKTGKDRLTINLECGVARCYGNGSWAVYLNKSQEYQALFSSMYLKKXISKVLACGVLLKCDIPQXNVVEX	63	19.5	-	4	4	3	3	0.678	1.1	1.372	4	4	4	*	-	*	Unigene22931_All	43.42	1e-07	gi|259155280|ref|NP_001158882.1|	2,3-cyclic-nucleotide 3-phosphodiesterase [Salmo salar] >gi|223647830|gb|ACN10673.1| 2,3-cyclic-nucleotide 3-phosphodiesterase [Salmo salar]	40.91	4e-07	sp|P09543|CN37_HUMAN	2',3'-cyclic-nucleotide 3'-phosphodiesterase OS=Homo sapiens GN=CNP PE=1 SV=2	43.42	2e-06	H2UUC8	H2UUC8_TAKRU Uncharacterized protein (Fragment) OS=Takifugu rubripes GN=CNP PE=4 SV=1	-	-	-	-	-	-	-	K01121|1|8e-14|75.9|spu:582388|2',3'-cyclic-nucleotide 3'-phosphodiesterase [EC:3.1.4.37]	-	-
204	Unigene23321_All	1 1025 LEN=1025; minus strand; translated	45224	XFSTDCVERNCLHASSKQINNFQFYIRLTVSQEYLXYLRPILTMLVFVIFLLFGCLIGVVSGQEWVSETNGNIPAYPFRGGYDDGRSLYICKDYFHGEPVVGKISYNQRSCKVPWGEKENNDYSYQVLTRPPWADYTLEWKGPYSWGNVPSGAVCIGSGVYVGRYKRSGRYYVPGKVIPKHWSMFYGYNGKEYQARRRYEVLVKKARGISHYQLTNVEYDFSQAEEIISPDLKQVATAQQVTNDSPYTVTTSVSLEITKTVTRSWSEMTEMGIEIGNKLTVKVGVPMLGEITNEFHVTATHTYQHKYGESTTQTHKSSHAVSVTMGPNSTASVMMVAKEARL	92	3.2	-	3	3	1	1	0.163	1.7	0.137	3	3	3	*	-	-	Unigene23321_All	37.84	5e-16	gi|318087058|gb|ADV40120.1|	methyltransferase-like protein [Latrodectus hesperus]	29.26	2e-08	sp|Q66S17|NATT3_THANI	Natterin-3 OS=Thalassophryne nattereri PE=1 SV=1	37.84	2e-15	E7D176	E7D176_LATHE Methyltransferase-like protein (Fragment) OS=Latrodectus hesperus PE=2 SV=1	-	-	-	-	-	-	-	K07739|1|6e-06|52.0|dan:Dana_GF21222|elongator complex protein 3 [EC:2.3.1.48]	-	-
205	CL8788.Contig3_All	200 3214 minus strand predicted protein [Populus trichocarpa] >gi|222847433|gb|EEE84980.1| predicted protein [Populus trichocarpa]	136791	ITSAGGVISMLDEPDIQLKAYALEKLNVLVDDFWAEIADTVEKIEMMYEDEKFEQREIAALVASKVYYHLGAFEESVAYALGAGSLFDVNSKSEYVSTIIAKCIDQYTKLKVHNYEHQDEPKEIDPRLEAVVNRMFKRCFDDKKFKQAVGIALETRRLDVFKEAILKSADIPTMLSYSVKVVMSLLQERQFGNTVLGVLVDLYMNLAVPDYINICQCLIFRDDPQAVADILDKLIKEGGEPALMAFQIGFDLYESATQKFLARIQGSLKPVGAEAETPTETKTEDQEESETKAETPSEDKDGEETKPEPSTVVELKPEEKEYNARLEKLNQILSGNSTISLHLQFLIRSNKADMLILKNTKEAVRNSVCHNATVIANSFMHCGTTCDSFLRENLEWLGR…	647	15.1	-	27	27	11	11	0.982	1.098	1.193	23	23	23	-	-	*	CL8788.Contig3_All	83.67	3e-41	gi|262302557|gb|ACY43871.1|	proteasome non-ATPase regulatory subunit [Peripatus sp. 'Pep']	68.79	0	sp|Q5F418|PSMD1_CHICK	26S proteasome non-ATPase regulatory subunit 1 OS=Gallus gallus GN=PSMD1 PE=2 SV=1	69.19	0	F6WGT0	F6WGT0_XENTR Uncharacterized protein OS=Xenopus tropicalis GN=psmd1 PE=4 SV=1	SPBC17D11.07c	779	0	COG5116	26S proteasome regulatory complex component	O	Posttranslational modification, protein turnover, chaperones ;	K03032|1|0.0|1126|xla:734707|26S proteasome regulatory subunit N2	GO:0019222//regulation of metabolic process	-	-
206	Unigene4817_All	358 1296 minus strand PREDICTED: uncharacterized protein LOC100244700 [Vitis vinifera] >gi|297742983|emb|CBI35850.3| unnamed protein product [Vitis vinifera]	40927	KKVIFVIDTSGSMYGNKIAQTKVAMDLILDQLRPIDSFNIMTFSHVSRAWKTSAIPATRNNKRLGKEFVSRLNPTGGTNIYGPLIDASRQFRDNEEAFPAIIFLTDGRPNAGVIGTDEIVAGVKRNLKDRVALFCIGFGNDVDDILLTRLSSENQGIYRKVFADSSAALQMQNFFEEVATPLLFNIAVQYLNGAVDADSLIGGNTISYFDGKEVLVAGKLADGYEGNELVALVEARGRRDISLQVSKELNQVLDPGMVADFAQRMWAFLTIKDYLAKEKLSSSQTEKAELKQKALDLSLKYSFVTPLTSLLVI	34	2.6	1	2	2	1	1	2.461	0.329	0.546	2	2	2	-	-	-	Unigene4817_All	42.6	2e-61	gi|260814261|ref|XP_002601834.1|	hypothetical protein BRAFLDRAFT_215239 [Branchiostoma floridae] >gi|229287136|gb|EEN57846.1| hypothetical protein BRAFLDRAFT_215239 [Branchiostoma floridae]	38.79	2e-51	sp|Q14624|ITIH4_HUMAN	Inter-alpha-trypsin inhibitor heavy chain H4 OS=Homo sapiens GN=ITIH4 PE=1 SV=4	42.81	1e-56	H3JL57	H3JL57_STRPU Uncharacterized protein OS=Strongylocentrotus purpuratus GN=SPU_027341gn PE=4 SV=1	alr4412	85.9	9e-17	COG2304	Uncharacterized protein containing a von Willebrand factor type A (vWA) domain	R	General function prediction only ;	K05316|1|9e-07|54.7|cqu:CpipJ_CPIJ005664|voltage-dependent calcium channel alpha-2/delta, invertebrate!K04861|3|9e-06|51.6|cfa:477733|voltage-dependent calcium channel alpha-2/delta-4	-	-
207	CL4352.Contig3_All	25 258 minus strand hypothetical protein VOLCADRAFT_68493 [Volvox carteri f. nagariensis] >gi|300256978|gb|EFJ41233.1| hypothetical protein VOLCADRAFT_68493 [Volvox carteri f. nagariensis]	9338	SASYGEGTGEIWLDDVQCDGSEHNVSSCANSGVGVHNCGHGEDAGVKCVIPQVRLVDGSADYEGRIEIFMKGAWGTIC	36	7.7	1	4	4	1	1	0.388	1.147	1.031	3	4	4	*	-	-	CL4352.Contig3_All	62.5	2e-11	gi|115928363|ref|XP_001199932.1|	PREDICTED: uncharacterized protein LOC763830, partial [Strongylocentrotus purpuratus]	60.42	5e-10	sp|Q14DK5|HIPL1_MOUSE	HHIP-like protein 1 OS=Mus musculus GN=Hhipl1 PE=2 SV=1	64.58	2e-08	G1KTW4	G1KTW4_ANOCA Uncharacterized protein (Fragment) OS=Anolis carolinensis PE=4 SV=1	-	-	-	-	-	-	-	K06545|1|8e-17|85.5|dre:564415|CD163 antigen	-	-
208	Unigene29489_All	11 805 inositol monophosphatase 3 [Solanum lycopersicum] >gi|1709205|sp|P54928.1|IMP3_SOLLC RecName: Full=Inositol monophosphatase 3; Short=IMP 3; Short=IMPase 3; AltName: Full=Inositol-1(or 4)-monophosphatase 3 >gi|1098971|gb|AAB19031.1| myo-ino	35890	MGSDYNIEEFIKTAEELAREAGVLVRDAYKKDKAVESKSCAVDLVTETDTKVEELLISRLRKKYPTHKFIGEESTVSGEPCLWTDDPTWIIDPVDGTMNFVHSFPFVGICIGLSIKKEIVGGVVYNPIYDEMFQAIKGKGAFCNNKPIKVSSQNDLKLSLFITEVGFNSQEMLDVKVANYKSLLEAGIRGFRSLGSAALNMCHIARGSAELYYEYGIHCWDMAAASIIVTEAGGVVMDTTGGPLDIMNRRCVAASSGSLVKEFTK	88	5.3	-	1	1	1	1	---	---	---	1	1	1	-	-	-	Unigene29489_All	57.79	1e-86	gi|390346412|ref|XP_003726545.1|	PREDICTED: inositol monophosphatase 1-like [Strongylocentrotus purpuratus]	51.74	4e-74	sp|Q5R4X0|IMPA1_PONAB	Inositol monophosphatase 1 OS=Pongo abelii GN=IMPA1 PE=2 SV=1	57.79	5e-86	H3ING3	H3ING3_STRPU Uncharacterized protein OS=Strongylocentrotus purpuratus GN=SPU_015691gn PE=4 SV=1	YDR287w	170	2e-42	COG0483	Archaeal fructose-1,6-bisphosphatase and related enzymes of inositol monophosphatase family	G	Carbohydrate transport and metabolism ;	K01092|1|2e-78|291|bfo:BRAFLDRAFT_114381|myo-inositol-1(or 4)-monophosphatase [EC:3.1.3.25]	GO:0046855//inositol phosphate dephosphorylation;GO:0006020//inositol metabolic process;GO:0006661//phosphatidylinositol biosynthetic process;GO:0007165//signal transduction	GO:0008934//inositol monophosphate 1-phosphatase activity;GO:0042803//protein homodimerization activity	GO:0030424//axon;GO:0005739//mitochondrion;GO:0043025//neuronal cell body;GO:0005634//nucleus
209	Unigene8204_All	404 1063 minus strand mitochondrial glyco protein, partial [Coccomyxa subellipsoidea C-169]	29359	PCTCGCAGLHTEADKQLSNFLAEEIQIEKESQKNPKIPTIAGFSVTTDGAEVTLTKEGSSDERVQVIFNVNHSVEFEENVEAEPPADSKDTDTPDGQMRSYPDFRVELTKSGKSTIAVQCSYTTDDDFNAEEEVEEGEADDPQDDLFLIDEVYMFKDQANEKTYRVGSEVMQGEMYDHLLALLESRGVDNEFADKLSDFASSFEHSSFIKFLESLKDTIK	133	10.5	-	8	8	2	2	0.848	0.866	0.703	8	6	8	-	-	-	Unigene8204_All	46.79	2e-43	gi|291235331|ref|XP_002737600.1|	PREDICTED: CG6459-like [Saccoglossus kowalevskii]	33.93	5e-29	sp|Q3T0B6|C1QBP_BOVIN	Complement component 1 Q subcomponent-binding protein, mitochondrial OS=Bos taurus GN=C1QBP PE=2 SV=1	42.48	4e-38	H3IXN2	H3IXN2_STRPU Uncharacterized protein OS=Strongylocentrotus purpuratus GN=SPU_018978gn PE=4 SV=1	-	-	-	-	-	-	-	K15414|1|1e-39|162|spu:584500|complement component 1 Q subcomponent-binding protein, mitochondrial	GO:0050848//regulation of calcium-mediated signaling;GO:0007274//neuromuscular synaptic transmission	-	GO:0005739//mitochondrion
210	CL676.Contig2_All	82 1689 minus strand predicted protein [Physcomitrella patens subsp. patens] >gi|162664976|gb|EDQ51676.1| predicted protein [Physcomitrella patens subsp. patens]	74585	MAYSGHGEKEVDPYAYDRFHTGDPKQDFNFEQSYQPGKSYIVPEEIKNFLVFFQRSVNEGNVSDVTTCYEHDFNKLSERFFKNSPWPDAENIIQIVGSDQVFLILYKELFYRHIIARTQSGPSQEQRFESYYNYCNFFNYILSSESPVGLQLPDQWLWDIIDEFIYQFQDFCKYRSKITNKTNEELLFLRQNPKVWNVHSVLNVLHSLVDKSNINAQLEMYGKGDDPDILGGDFGRHPLYKMLGYFSLIGLLRLHSLLGDYFQAIKVLEYIELDKQTSYTQVPTCQVTTYYYVGFAYMMMRRYKDAIRSFTSILLYIQRTNYMVSTSGSYQIDVVKKMNDQIMNLLAICLVLHPMRIDEALQALLMEKYGEKIQRMEKGEPQAFDDAFSYACPRFLSPV…	227	7.8	-	10	10	4	4	0.874	0.942	0.942	9	9	9	-	-	-	CL676.Contig2_All	81.25	4e-07	gi|297708828|ref|XP_002831155.1|	PREDICTED: eukaryotic translation initiation factor 3 subunit L-like [Pongo abelii]	62.7	2e-170	sp|A7SDW5|EIF3L_NEMVE	Eukaryotic translation initiation factor 3 subunit L OS=Nematostella vectensis GN=v1g169424 PE=3 SV=1	78.79	4e-07	H2P4C1	H2P4C1_PONAB Uncharacterized protein OS=Pongo abelii GN=LOC100441418 PE=4 SV=1	-	-	-	-	-	-	-	K15029|1|0.0|686|spu:591170|translation initiation factor 3 subunit L	GO:0006413//translational initiation	GO:0003743//translation initiation factor activity	GO:0005852//eukaryotic translation initiation factor 3 complex
211	Unigene15076_All	210 2048 minus strand succinate dehydrogenase flavoprotein subunit,mitochondrial precursor [Zea mays]	76913	SRDYPVIDHTFDAVVVGAGGAGLRAAFGLAHEGFKTACVTKLFPTRSHTVAAQGGINAALGNMEPDNWRWHMYDTVKGSDWLGDQDAIHYMTEEAPKAVIELENYGMPFSRTEEGKIYQRAFGGQSYDYGKGGQAHRCCAVADRTGHSLLHTLYGQSLKYDTNYFIEYFALDLIMEDGECRGVVALCLEDGTIHRFRSTNTILATGGYGRAYFSCTSAHTCTGDGTAMVSRAGLPNQDMEFVQFHPTGIYGAGCLITEGCRGEGGYLLNSEGERFMERYAPTAKDLASRDVVSRSMTIEIREGRGVGPDKDHVYLQLSHLPPEQLALRLPGISETAQIFAGVDVTREPIPVLPTVHYNMGGVPTNYKGQVVTHVDGEDQVVKGLYACGEAACASVHGAN…	694	30.5	-	29	29	11	11	1.042	1.007	0.892	28	26	28	-	-	-	Unigene15076_All	86.32	0	gi|115647100|ref|XP_801853.2|	PREDICTED: succinate dehydrogenase [ubiquinone] flavoprotein subunit, mitochondrial-like isoform 3, partial [Strongylocentrotus purpuratus]	82.06	0	sp|Q9YHT1|DHSA_CHICK	Succinate dehydrogenase [ubiquinone] flavoprotein subunit, mitochondrial OS=Gallus gallus GN=SDHA PE=1 SV=2	89.6	0	H3IB93	H3IB93_STRPU Uncharacterized protein OS=Strongylocentrotus purpuratus GN=SPU_011329gn PE=4 SV=1	SPAC1556.02c	893	0	COG1053	Succinate dehydrogenase/fumarate reductase, flavoprotein subunit	C	Energy production and conversion ;	K00234|1|0.0|1066|spu:580610|succinate dehydrogenase (ubiquinone) flavoprotein subunit [EC:1.3.5.1]	GO:0006810//transport;GO:0006105//succinate metabolic process;GO:0006099//tricarboxylic acid cycle;GO:0007399//nervous system development;GO:0022904//respiratory electron transport chain	GO:0050660//flavin adenine dinucleotide binding;GO:0008177//succinate dehydrogenase (ubiquinone) activity	GO:0005749//mitochondrial respiratory chain complex II
212	Unigene61516_All	1 454 LEN=454; minus strand; translated	24396	XRNHVFKNKSCLCRITRELEKTKREYREVRQKKKRGLLKKEKXTSIKDEAIINTFIYWNISEEKVKHVCKKCTSTCVAWGRADLYSGSIERRDKEETIDLVQSDLDQDKNTDSQSETLTTAVPSNSDEKQEVNKEVTNYQTIEVDGHSKIDX	43	9.9	-	1	1	1	1	---	---	---	1	1	1	-	-	-	Unigene61516_All	-	-	-	-	-	-	-	-	-	-	-	-	-	-	-	-	-	-	-	-	-	-
213	CL2397.Contig1_All	69 2030 ATP-binding Cassette (ABC) Superfamily [Phytophthora infestans T30-4] >gi|262096576|gb|EEY54628.1| ATP-binding Cassette (ABC) Superfamily [Phytophthora infestans T30-4]	87584	YSKTSAITICSGFAIFYLSRLAPLSFSRQKRKSTFADLKVNLKEEKTNRSKAAVDAVFFSRLYKILKILVPGWFSREGGLLLLVALSLILRTVCDIWMIQNSTSVESSIIQRNHEQFKMYLIRFMYAMPMISLVNNVLKYGLNQLKLRFRTRLTNYLYSKYLRGFTYYKMSNLDNRVANADQLLTQDVEKFCNSVADLYSNLSKPVLDIVIYIRQLALAIGAQGPATMIGYLAVAGLILTRLRKPVSQMTVQEQRLEGEFRFVNARLITNSEEIAFYQGNKREERTIQKAFRKLVEHLNNFIFFRFSMGFVDNIIAKYCATCVGWYVVSRPFMNPDDPLLENMNQAEALKHYYNAGRMLIRLSEAIGRVVLSGREMARLAGFTERVHELMMVLKDLNLG…	275	13.8	-	14	14	8	8	1.306	1.052	1.476	13	13	13	-	-	*	CL2397.Contig1_All	71.71	0	gi|390335880|ref|XP_788720.3|	PREDICTED: ATP-binding cassette sub-family D member 3-like [Strongylocentrotus purpuratus]	68.59	0	sp|P55096|ABCD3_MOUSE	ATP-binding cassette sub-family D member 3 OS=Mus musculus GN=Abcd3 PE=1 SV=2	71.6	4e-27	B7PS95	B7PS95_IXOSC Peroxisomal membrane protein, putative OS=Ixodes scapularis GN=IscW_ISCW008186 PE=4 SV=1	YPL147w	283	7e-76	COG4178	ABC-type uncharacterized transport system, permease and ATPase components	R	General function prediction only ;	K05677|1|0.0|969|spu:583732|ATP-binding cassette, subfamily D (ALD), member 3	GO:0006635//fatty acid beta-oxidation;GO:0015910//peroxisomal long-chain fatty acid import;GO:0007031//peroxisome organization;GO:0042493//response to drug;GO:0042760//very long-chain fatty acid catabolic process;GO:0055085//transmembrane transport;GO:0006200//ATP catabolic process	GO:0043621//protein self-association;GO:0042626//ATPase activity, coupled to transmembrane movement of substances;GO:0042803//protein homodimerization activity;GO:0005524//ATP binding	GO:0005743//mitochondrial inner membrane;GO:0016021//integral to membrane;GO:0005829//cytosol;GO:0005778//peroxisomal membrane
214	Unigene29607_All	305 595 minus strand predicted protein [Hordeum vulgare subsp. vulgare]	13445	RRTRTSSLSRSAADNPQKTGVIAEFCKKRGHGFITPDESPDRLFVHVSDVEGEYVPMAGDHVTYKECPIPPKRSKVQAVEVIITHLAPGTKHHRWED	494	30.9	-	13	13	3	3	0.824	0.911	0.787	11	12	12	-	-	*	Unigene29607_All	71.93	1e-16	gi|291390569|ref|XP_002711830.1|	PREDICTED: calcium-regulated heat-stable protein (24kD)-like [Oryctolagus cuniculus]	61.18	3e-25	sp|Q9CR86|CHSP1_MOUSE	Calcium-regulated heat stable protein 1 OS=Mus musculus GN=Carhsp1 PE=1 SV=1	70.83	1e-23	G3TN75	G3TN75_LOXAF Uncharacterized protein OS=Loxodonta africana GN=CARHSP1 PE=4 SV=1	-	-	-	-	-	-	-	-	GO:0035556//intracellular signal transduction;GO:0043488//regulation of mRNA stability	GO:0003730//mRNA 3'-UTR binding;GO:0019902//phosphatase binding	GO:0005829//cytosol;GO:0000177//cytoplasmic exosome (RNase complex);GO:0043186//P granule
215	Unigene11975_All	2 1279 predicted protein [Ostreococcus lucimarinus CCE9901] >gi|144578182|gb|ABO96247.1| predicted protein [Ostreococcus lucimarinus CCE9901]	60191	SAECLVIGEIACKKMLVVLNKVDLLQPEKKQQQIDKMTKRMLKTLENTCFANSPVIPVAAKPGGPDAPEVNAEGVETLIEELKRHAYLPARDSTGQLLFSVDHCFGIKGQGTVMTGTMLRGRVAVNDTVEIPSMQITRKVKSMQMFRQPVESAIMGDRVGICVTQFDPKLLERGLVCTPGSLPTIEAAVISVTKIGYFRGPCATKAKFHVTMGHETVMARVTFFGDVPGQSYPEREKIAFSFDKEYLYQDDLKAPVKSKGSSNKENQPEEDALPSNTLQWALLEFEKPITCPVNCLVIGSKLDTDIHSNTCRLAFHGYLLDSTTDKEYVASYLPSLKIYKTKTREGVVDRMTDEYSIIGRGLFKKETNLQTFVGLKVKLSTGESGVIEGGFGQSGKFKI…	36	4	-	1	1	1	1	---	---	---	1	1	1	-	-	-	Unigene11975_All	71.88	1e-19	gi|327266041|ref|XP_003217815.1|	PREDICTED: selenocysteine-specific elongation factor-like [Anolis carolinensis]	60.34	4e-145	sp|P57772|SELB_HUMAN	Selenocysteine-specific elongation factor OS=Homo sapiens GN=EEFSEC PE=1 SV=4	75.58	1e-30	H3IS30	H3IS30_STRPU Uncharacterized protein OS=Strongylocentrotus purpuratus GN=SPU_016991gn PE=4 SV=1	MK0148	104	3e-22	COG3276	Selenocysteine-specific translation elongation factor	J	Translation, ribosomal structure and biogenesis ;	K02358|1|6e-13|75.9|bmy:Bm1_54320|elongation factor Tu	-	GO:0000166//nucleotide binding	-
216	Unigene34056_All	1 300 LEN=300; minus strand; translated	14165	XNIDDDRPLKRVKGDHGTENEKEVAEKEDIPSIDVAGHGNLVLAGNSNMTLNFFSNSSKHENDTTKHCWDWSRTSEKEAQVEDVTDVFRKFADGLSQHVDX	19	9.9	-	1	1	1	1	---	---	---	-	-	-	-	-	-	Unigene34056_All	-	-	-	-	-	-	-	-	-	-	-	-	-	-	-	-	-	-	-	-	-	-
217	Unigene32747_All	1 1007 LEN=1497; translated	43675	XPFLNVNSKDIQCSNCSDARSNFKNQDDALGGSMKVLLIMCFLLSPIVSASVTKEKDVSVFTWGGVSAYIAVNRNKVQTKLNDINQSRPGAPQLFVPEDPVLPNLTEDQHIVYIDFGFVTPESVTVDPSIASFSREVSVAIPFLSTTPKGAPNYAMAIDKMYDIGVNGDIFITQPIYQYTPVEKVNIMGSEASMEDQTETIRITFNQTHPCRKSPVRLRNEFNDFLLNNNIFGSSDPDLDFCNRHPKMSKSQYCQTMDDIKENFQNDILCAKQTSSTNPEENFPCEVSLAVDAITPGLRGLLLLGPTDTIQVVAAEQYIKKFVFSLRYPCTVKNXE	35	3.3	-	1	1	1	1	---	---	---	1	1	1	-	-	-	Unigene32747_All	-	-	-	-	-	-	-	-	-	-	-	-	-	-	-	-	-	-	-	-	-	-
218	Unigene4878_All	3 1229 minus strand PREDICTED: acyl-coenzyme A oxidase 2, peroxisomal-like [Solanum lycopersicum]	51137	KLGLNGFSNGFASFNKVRIPKENLLNRLGDVVDDGRYVSQFKSIGERLGATLSILSSGRIAIIDSSAVNLASAVSIAVRYSAVRRQFGPTKEGEIPVLEYQLQQWRLLPYVAGCYIYLNFARRVHYLYVEYLTAIITGSKTPGAKDDADLLKEVHALVSSGKPAASWLAQRGIQECREACGGHGYLWANRFGVLRDDNDPNVSYEGDNNVILQQTSRHLLLTARDVFQGNEVRSPLGSLDFLRNVSDILGDKFSAKSIQELAEPNTILRAYRWLVVYLMEQSGDKFSRELEATKNGFTANNNAQVYNCRSMSIAYIELTALDWFYQLINGPDVLPELRNVLLKLFSLYGVWSLEKHTSTLVKGGYIVGSEPIQLIEDAILHLCSNLKDEAVALVDAIAP…	146	10.5	-	8	8	4	4	1.118	1.014	3.581	5	5	5	-	-	*	Unigene4878_All	80.85	5e-14	gi|405958017|gb|EKC24186.1|	Peroxisomal acyl-coenzyme A oxidase 3 [Crassostrea gigas]	53.17	2e-122	sp|Q9EPL9|ACOX3_MOUSE	Peroxisomal acyl-coenzyme A oxidase 3 OS=Mus musculus GN=Acox3 PE=2 SV=2	55.17	4e-77	H2QP76	H2QP76_PANTR Uncharacterized protein OS=Pan troglodytes GN=ENSG00000087008 PE=3 SV=1	YGL205w	112	9e-25	COG1960	Acyl-CoA dehydrogenases	I	Lipid transport and metabolism ;	K00232|1|6e-134|477|spu:580963|acyl-CoA oxidase [EC:1.3.3.6]	GO:0033540//fatty acid beta-oxidation using acyl-CoA oxidase	GO:0050660//flavin adenine dinucleotide binding;GO:0016402//pristanoyl-CoA oxidase activity;GO:0005102//receptor binding;GO:0005504//fatty acid binding	GO:0005782//peroxisomal matrix;GO:0005739//mitochondrion
219	Unigene17324_All	2 358 Thymidylate synthase [Blastocystis hominis]	16472	RPLKNRINIVLSRSLQEKPEGSQYLFDSLESAIEHLSKPEMQKEIHEVWIVGGQSVYKVSMESPLCHRIYLTKVFADIECDTFFPEIDMERFHLVSDPAINGETQEENGLKFQFLIYER	39	12.6	-	1	1	1	1	---	---	---	1	1	1	-	-	-	Unigene17324_All	53.39	2e-34	gi|72009986|ref|XP_780421.1|	PREDICTED: dihydrofolate reductase-like isoform 1 [Strongylocentrotus purpuratus]	47.5	4e-31	sp|P00378|DYR_CHICK	Dihydrofolate reductase OS=Gallus gallus GN=DHFR PE=1 SV=1	56.9	1e-11	H9L0P3	H9L0P3_CHICK Dihydrofolate reductase OS=Gallus gallus GN=DHFR PE=4 SV=1	BMEI0609	72.4	2e-13	COG0262	Dihydrofolate reductase	H	Coenzyme transport and metabolism ;	K00287|1|2e-35|147|spu:575335|dihydrofolate reductase [EC:1.5.1.3]	GO:0046653//tetrahydrofolate metabolic process;GO:0044238//primary metabolic process;GO:0019438//aromatic compound biosynthetic process;GO:1901362//organic cyclic compound biosynthetic process;GO:0018130//heterocycle biosynthetic process;GO:0044271//cellular nitrogen compound biosynthetic process;GO:0044281//small molecule metabolic process	GO:0008144//drug binding;GO:0003729//mRNA binding;GO:0004146//dihydrofolate reductase activity	-
220	Unigene24597_All	1 221 LEN=221; minus strand; translated	10514	XRSIQDSLDALLRWLDEKERAFLRMEKGTVIVVKKEPLVENLQEYRLLEKDIDSHRPTIRSVLQTANQAIHSLQ	44	25.7	-	2	1	2	1	---	---	---	1	1	1	-	-	-	Unigene24597_All	74.47	1e-13	gi|390356404|ref|XP_003728775.1|	PREDICTED: uncharacterized protein LOC582631 [Strongylocentrotus purpuratus]	-	-	-	-	56.67	3e-12	H3HNL7	H3HNL7_STRPU Uncharacterized protein OS=Strongylocentrotus purpuratus GN=SPU_003261gn PE=4 SV=1	-	-	-	-	-	-	-	-	-	-
221	Unigene15499_All	1 1107 LEN=1107; minus strand; translated	50059	XFRNQQLTKKVEGLQEQLRTAESRGSKNAVRGDDHHISDPTLEILQTELRSKIEEIAKLHQKLNDGSEQHVQSVTDLQNRLENLERENSQHQSVLEGLKREHQETVERLQEDKARLEIKVQNQEKVVQSSTLTAAQCSDELTRVQEDLEAKIQWAMGIINNKLPFNDTGLNELNSFNVPTHDRKHQKKTKTLVGQALTMVKELCAGLSNFHTYTEQRCKIYPIDASTGVPISEINQKFCNHLHENAAYLRPIEKAFRSFYNSINDDTLTTLETATELGEVAANFSKYVRYHETILPYQLLSLEEECAISSCPQTLESRNMDVHSSFKKMASALVALESYVSLLASASTASSTVLVSNYPGIFKKFAESAT	48	3	-	2	2	1	1	---	---	---	1	1	1	-	-	-	Unigene15499_All	51.3	3e-82	gi|390350764|ref|XP_794940.3|	PREDICTED: protein phosphatase 1 regulatory subunit 21-like [Strongylocentrotus purpuratus]	42.77	2e-72	sp|Q3TDD9|PPR21_MOUSE	Protein phosphatase 1 regulatory subunit 21 OS=Mus musculus GN=Ppp1r21 PE=2 SV=2	54.96	9e-98	H3IJS4	H3IJS4_STRPU Uncharacterized protein OS=Strongylocentrotus purpuratus GN=SPU_014368gn PE=4 SV=1	-	-	-	-	-	-	-	-	-	-
222	Unigene904_All	342 1403 minus strand hypothetical protein PHYSODRAFT_566756 [Phytophthora sojae]	45719	EGGGSVRIPFYWLRDNCRCSSCFHHDTNQILHNIVDLNLDIKPTDVQSDHGEVTITWDDCHKTVFSNSWLREYFPGAADNAMTGEQDIYRTLWQGNYFNMPSFELVDLQNDRPTLKKFLQTLHEYGVALIGGVDTSSEAHANVAKLVAGGIQSTFYHPEVCVASPGLDIADTAYTNLAIPLHTDASYFSPPCRGMTLQITERSGNGGRTVISDGFYALERLRLSQPEYFQLLCDTSITAHYLDDERDMRNCEPVVKMNSNTKQVERLRFNPFDRATITNLPYEDMLEFYKAYQALAKEIYDDEKAFKILLKPDQMVVYDNWRILHARESFTGHRVLKCTYLRHDDWMSQMRKIG	37	6.2	-	3	3	2	2	---	---	---	1	1	1	-	-	-	Unigene904_All	35.76	2e-22	gi|389612007|dbj|BAM19538.1|	epsilon-trimethyllysine 2-oxoglutarate dioxygenase, partial [Papilio xuthus]	33.15	7e-51	sp|Q9NVH6|TMLH_HUMAN	Trimethyllysine dioxygenase, mitochondrial OS=Homo sapiens GN=TMLHE PE=1 SV=1	35.86	3e-32	H3I5Q3	H3I5Q3_STRPU Uncharacterized protein (Fragment) OS=Strongylocentrotus purpuratus GN=SPU_009359gn PE=4 SV=1	mll1440	114	3e-25	COG2175	Probable taurine catabolism dioxygenase	Q	Secondary metabolites biosynthesis, transport and catabolism ;	K00474|1|4e-53|208|xla:100189568|trimethyllysine dioxygenase [EC:1.14.11.8]	GO:0034641//cellular nitrogen compound metabolic process;GO:0044281//small molecule metabolic process	GO:0051213//dioxygenase activity	GO:0005739//mitochondrion
223	CL1610.Contig1_All	519 1802 uncharacterized protein LOC100274386 [Zea mays]	55663	VTIKKCEDNEYPSLESDESYSLAVGDANSSIIANTIWGGLSGLETFSQLTYYNNDGMLVINKTTIQDSPRFSHRGLLVDTSRHFIKVPILLQNLDAMAYNKLNVFHWHIVDMQAFPYESINFPSLSETGAYSPSHVYTQEDVALVIEYARLRGIRVMPEFDTPGHTFNSWGSIKDLLTPCYSGDKPDGTFGPVNPTLNSTYDFLKSFMQEITSVFPDHYIHLGGDEVNFKCWQSNPQITDFMKAQGFGSDYSKLEEYYEQKLLDIMSDLNSGYAVWQEVIDNNVKVKNDTIVEVWLPKWQNEFAKVTSKGYRTLLTSTFYLNRVASPYGQDWKGYYGVDPQDFNGTDAQKKLVIGGEVCMWGEFVDGTNLIPRLWPRASAVSERLWSPQSVTSLDDAKI…	789	23.4	-	35	2	8	1	---	---	---	-	-	-	-	-	-	CL1610.Contig1_All	64.71	1e-167	gi|72098985|ref|XP_799340.1|	PREDICTED: beta-hexosaminidase subunit beta [Strongylocentrotus purpuratus]	58.59	1e-150	sp|P07686|HEXB_HUMAN	Beta-hexosaminidase subunit beta OS=Homo sapiens GN=HEXB PE=1 SV=3	63.8	1e-95	F1QTE2	F1QTE2_DANRE Uncharacterized protein (Fragment) OS=Danio rerio GN=hexb PE=4 SV=1	CC0447	168	1e-41	COG3525	N-acetyl-beta-hexosaminidase	G	Carbohydrate transport and metabolism ;	K12373|1|1e-168|592|spu:594823|hexosaminidase [EC:3.2.1.52]	GO:0009653//anatomical structure morphogenesis;GO:0030207//chondroitin sulfate catabolic process;GO:0019953//sexual reproduction;GO:0030214//hyaluronan catabolic process;GO:0051179//localization;GO:0007610//behavior;GO:0005975//carbohydrate metabolic process;GO:0006687//glycosphingolipid metabolic process;GO:0048869//cellular developmental process;GO:0016043//cellular component organization;GO:00…	GO:0004563//beta-N-acetylhexosaminidase activity;GO:0046982//protein heterodimerization activity;GO:0042803//protein homodimerization activity	GO:0043202//lysosomal lumen
224	CL12487.Contig2_All	321 1352 conserved hypothetical protein [Phytophthora infestans T30-4] >gi|262109729|gb|EEY67781.1| conserved hypothetical protein [Phytophthora infestans T30-4]	44271	SAMNLTNSSSSGNGLLHAAFNQDHGCFACGMETGFRVYNTDPLREKERQDFDGGIGHVEMLFRCNYLALIGGGRHPHYPPNKAMIWDDLKKKPVIELEFSTEVKAVRLRRDRIVVVLDTMIKVYTFTQNPQQLHVFDTCFNSKGLCVLCPNSNNSLLAFPGRHTGVVQIVDLANTEKAPLEISAHEGTLCCLTFNHQGTRLATASEKGTLIRIFDTSSGTQLQELRRGSGSAAIYCISFNQDSSLLCVSSDHGTVHVFAVEDPAKNKQSSLASATFLPKYFSSKWSFSKFQVPNNAQCICAFGADTNSVIAICADGSYYKFVFNPKGECTRDVYTQFLEMTDDD	60	6.7	-	4	4	2	2	0.998	1.288	0.666	3	3	3	-	-	-	CL12487.Contig2_All	82.37	2e-148	gi|72170536|ref|XP_792976.1|	PREDICTED: WD repeat domain phosphoinositide-interacting protein 3-like [Strongylocentrotus purpuratus]	79.82	7e-145	sp|Q640T2|WIPI3_XENTR	WD repeat domain phosphoinositide-interacting protein 3 OS=Xenopus tropicalis GN=wdr45l PE=2 SV=1	82.37	5e-148	H3HI88	H3HI88_STRPU Uncharacterized protein OS=Strongylocentrotus purpuratus GN=SPU_001341gn PE=4 SV=1	-	-	-	-	-	-	-	-	GO:0000045//autophagic vacuole assembly	GO:0080025//phosphatidylinositol-3,5-bisphosphate binding;GO:0032266//phosphatidylinositol-3-phosphate binding	GO:0005737//cytoplasm
225	CL2782.Contig1_All	1 266 LEN=266; translated	12194	XTGDNKRFEKLVYSIVPGLTANLDSKLSEPFDPHTSLSSSIYNILASLCFGKQYEFDSPELTRIMYLTKEANEIAGSGLLADYIPIFKPX	107	17.8	-	3	3	1	1	1.446	1.125	1.779	3	3	3	-	-	-	CL2782.Contig1_All	56.52	2e-09	gi|291220736|ref|XP_002730380.1|	PREDICTED: cytochrome P450 17alpha-hydroxylase/17, 20-lyase-like [Saccoglossus kowalevskii]	43.1	7e-09	sp|P00185|CP1A1_RAT	Cytochrome P450 1A1 OS=Rattus norvegicus GN=Cyp1a1 PE=1 SV=1	42.86	2e-06	Q80UE2	Q80UE2_RAT Cytochrome P-450c OS=Rattus norvegicus GN=Cyp1a1 PE=2 SV=1	-	-	-	-	-	-	-	K07408|1|6e-09|59.3|rno:24296|cytochrome P450, family 1, subfamily A, polypeptide 1 [EC:1.14.14.1]	GO:0009615//response to virus;GO:0045750//positive regulation of S phase of mitotic cell cycle;GO:0030324//lung development;GO:0032496//response to lipopolysaccharide;GO:0009611//response to wounding;GO:0042737//drug catabolic process;GO:0060137//maternal process involved in parturition;GO:0032094//response to food;GO:0070988//demethylation;GO:0046677//response to antibiotic;GO:0043010//camera-ty…	GO:0016679//oxidoreductase activity, acting on diphenols and related substances as donors;GO:0016711//flavonoid 3'-monooxygenase activity;GO:0008395//steroid hydroxylase activity;GO:0032451//demethylase activity;GO:0016712//oxidoreductase activity, acting on paired donors, with incorporation or reduction of molecular oxygen, reduced flavin or flavoprotein as one donor, and incorporation of one at…	GO:0016020//membrane;GO:0005739//mitochondrion
226	CL12335.Contig3_All	1 612 LEN=1344; minus strand; translated	27845	TVFYANCKHSVRTYVCTLVSLGYSRPVAYPVTLCKASNEVMANPKHSLSRVDLRPAAGAEPAVPAWAKDDYVLSRWIKEERARRRRFLADQVLEHSEPRIHYRPQNTIGDRIFGPIRNAFKPLDVATGGRLFRGWLHTKKYLVLLVIPAWTAHYFVKYHVATKPHGIVTEKSAVFPAKTDHAGHHXSVAIFGSSKTVRSRKENQ	131	18.6	-	7	1	3	1	---	---	---	1	1	1	-	-	-	CL12335.Contig3_All	47.11	6e-16	gi|390361528|ref|XP_001180805.2|	PREDICTED: uncharacterized protein LOC752983 [Strongylocentrotus purpuratus]	33.67	3e-06	sp|P0CB93|NDUB6_PONAB	NADH dehydrogenase [ubiquinone] 1 beta subcomplex subunit 6 OS=Pongo abelii GN=NDUFB6 PE=2 SV=1	47.11	2e-15	H3J367	H3J367_STRPU Uncharacterized protein OS=Strongylocentrotus purpuratus GN=SPU_020957gn PE=4 SV=1	-	-	-	-	-	-	-	K03962|1|2e-20|99.4|spu:574803|NADH dehydrogenase (ubiquinone) 1 beta subcomplex 6 [EC:1.6.5.3 1.6.99.3]	-	-
227	CL8779.Contig1_All	2 280 PREDICTED: 60S ribosomal protein L23a isoform 1 [Vitis vinifera] >gi|297746139|emb|CBI16195.3| unnamed protein product [Vitis vinifera]	14806	SVPKRPRLDQFSTVKYPLTTESAMKKIEEFNTLVFIVSLKANKFQIKQAVKKLYDIDVAKVNTLIRPDGEKKAYVRLAPDFDALDVANKIGII	509	43	1	34	34	5	5	1.029	1.16	1.006	28	28	28	-	-	-	CL8779.Contig1_All	92.21	9e-33	gi|296474538|tpg|DAA16653.1|	TPA: ribosomal protein L23a-like [Bos taurus]	82.8	1e-38	sp|P62752|RL23A_RAT	60S ribosomal protein L23a OS=Rattus norvegicus GN=Rpl23a PE=2 SV=1	86.02	8e-38	B0Z9M5	B0Z9M5_9BILA Ribosomal protein rpl23a (Fragment) OS=Lineus viridis PE=2 SV=1	YOL127w	127	5e-30	COG0089	Ribosomal protein L23	J	Translation, ribosomal structure and biogenesis ;	K02893|1|1e-43|174|spu:588157|large subunit ribosomal protein L23Ae	GO:0008283//cell proliferation;GO:0006412//translation	GO:0003735//structural constituent of ribosome;GO:0000166//nucleotide binding	GO:0022625//cytosolic large ribosomal subunit;GO:0005634//nucleus
228	Unigene13536_All	69 365 minus strand hypothetical protein AURANDRAFT_22616 [Aureococcus anophagefferens]	12833	RQFNMNYLRFINSLSQARQRSPIRLMTEILYKSPPTMISMASGMPNASQFPFEEATFKLTDGTSIEINNTDMKKALQYNPTPGIAGLHSWLMSMLQHPH	21	8.1	-	1	1	1	1	---	---	---	-	-	-	-	-	-	Unigene13536_All	52.63	3e-21	gi|443709967|gb|ELU04387.1|	hypothetical protein CAPTEDRAFT_156025 [Capitella teleta]	50.57	5e-19	sp|Q8N5Z0|AADAT_HUMAN	Kynurenine/alpha-aminoadipate aminotransferase, mitochondrial OS=Homo sapiens GN=AADAT PE=1 SV=2	52.63	3e-20	H0Z743	H0Z743_TAEGU Uncharacterized protein OS=Taeniopygia guttata GN=AADAT PE=4 SV=1	-	-	-	-	-	-	-	K00825|1|5e-22|102|xla:398787|kynurenine/2-aminoadipate aminotransferase [EC:2.6.1.7 2.6.1.39]	GO:0006103//2-oxoglutarate metabolic process;GO:0006536//glutamate metabolic process;GO:0006569//tryptophan catabolic process;GO:0006554//lysine catabolic process;GO:0070189//kynurenine metabolic process	GO:0016212//kynurenine-oxoglutarate transaminase activity;GO:0047536//2-aminoadipate transaminase activity;GO:0042803//protein homodimerization activity	GO:0005759//mitochondrial matrix
229	CL5739.Contig3_All	415 1515 PREDICTED: UPF0361 protein C3orf37 homolog isoform 1 [Fragaria vesca subsp. vesca]	52859	MCGRTACTLDPNQLRQACTYTNRQGQSRQPRWRRHGNDGGGGHQSTTKQTGNHDNKRKRKYFPSYNTAPQALTPVLVSSQHLKDEDEESNEEQSLMLMKWGLVPSWHKGDPSAIAYKMNNCRSEGMMEKASFKRPFEKGQRCVVLADGYYEWHTDSNKKKQPYFIYFSQQEPVKDLNLPESYEFDYEGANGEIDEKWTGHRLLTMAGIFDKWTPPDGSDPLYSYSVITIEADPSVSWIHHRMPVMLDGEEAVRDWLDFGNVSASKALTMMKPLNCLSCHPVTPQMGNIRYKDPDCIKEISLQEKKKPNTFMTSWLKTSSKSEVDVAGQPSVDVKVKSEKKTGLTAWLQKANKPETVKRAVESASPEK	36	2.7	-	1	1	1	1	---	---	---	1	1	1	-	-	-	CL5739.Contig3_All	49.45	9e-91	gi|390360068|ref|XP_790183.3|	PREDICTED: UPF0361 protein C3orf37 homolog [Strongylocentrotus purpuratus]	43.25	2e-70	sp|Q5ZJT1|CC037_CHICK	UPF0361 protein C3orf37 homolog OS=Gallus gallus GN=RCJMB04_15p13 PE=2 SV=1	52.63	2e-85	H3IFA6	H3IFA6_STRPU Uncharacterized protein OS=Strongylocentrotus purpuratus GN=SPU_012777gn PE=4 SV=1	all3194	98.6	2e-20	COG2135	Uncharacterized conserved protein	S	Function unknown ;	K05696|1|6e-42|171|ame:408900|protein tyrosine phosphatase, non-receptor type 1 [EC:3.1.3.48]	-	-
230	Unigene991_All	180 1205 hypothetical protein PHYSODRAFT_518272 [Phytophthora sojae]	44881	CVPGSVPVDPWTNFALYTQRELQIDEPFDKVSFLDAHNAYNNRADGYGKNDTCAWPPPYRELCWGFANQEFSITDMLNMGIRGVEMDNWFCRDAMRLAHLGSNIKIGCQDDDKLYSEGIKEIADWLNTDGNQLEIVRIYLNEKQDQGHDDLMNDPITEYLGSKVFTPRDLNETYKGYWPTLRQMRKDGKNVVIATGSTAGSGELYTHGDVYIHKLYWSDRQYRRFTPYPECGGKTENSGAVRYYSDSTHYPAISDGPTSVGFVSNYWELLKCRIEFPAGDQVNPKLMKTAVYTWAEGEPSEPLVSNSCIKMSGEDNRWYVANCEEELHYACQHSDDLSDWTI	53	3.5	-	1	1	1	1	---	---	---	1	1	1	-	-	-	Unigene991_All	49.71	3e-94	gi|390332962|ref|XP_003723606.1|	PREDICTED: uncharacterized protein LOC100890124 [Strongylocentrotus purpuratus]	23.1	6e-13	sp|Q10683|Y2075_MYCTU	Uncharacterized protein Rv2075c/MT2135 OS=Mycobacterium tuberculosis GN=Rv2075c PE=4 SV=1	50.43	3e-98	H3IXZ0	H3IXZ0_STRPU Uncharacterized protein OS=Strongylocentrotus purpuratus GN=SPU_019088gn PE=4 SV=1	-	-	-	-	-	-	-	-	-	-
231	Unigene22473_All	138 332 hypothetical protein GUITHDRAFT_91152 [Guillardia theta CCMP2712]	9864	DLVDPRDELVEKCGEHCEKIKAELDACTERVTNKPGTEEMCTQELFDFLHCVDHCTGPKTLALYK	19	9.2	-	1	1	1	1	---	---	---	-	-	-	-	-	-	Unigene22473_All	59.09	8e-15	gi|390336730|ref|XP_795093.3|	PREDICTED: cytochrome b-c1 complex subunit 6, mitochondrial-like [Strongylocentrotus purpuratus]	46.97	8e-08	sp|P07919|QCR6_HUMAN	Cytochrome b-c1 complex subunit 6, mitochondrial OS=Homo sapiens GN=UQCRH PE=1 SV=2	59.09	5e-14	H3IGJ8	H3IGJ8_STRPU Uncharacterized protein OS=Strongylocentrotus purpuratus GN=SPU_013225gn PE=4 SV=1	-	-	-	-	-	-	-	K00416|1|1e-15|81.6|spu:590393|ubiquinol-cytochrome c reductase subunit 6	-	-
232	Unigene5011_All	712 1359 enoyl-CoA hydratase domain-containing protein [Ectocarpus siliculosus]	26511	MMVELSDVVQDLECWEEGKAVILFGDPEGSNFCAGADLHTIRQLGTKQGGMMCLFMQNVLSRLQRLPLISVAAVSGRATGGGAELTTACDFRVMSPDASIQFVQAKMGMSPGFGGGSRLVRIVGPRTALKLLTSTQMISSEEALNFGLSDSTVSETKDICQAASDWLGQYTAAPVDVVRAMKTVVKHATELTLDQALLREKHVFTSLWGGPEQRKA	80	6.5	-	3	3	1	1	1.335	0.763	1.185	3	3	3	-	-	-	Unigene5011_All	52.89	3e-29	gi|328909361|gb|AEB61348.1|	enoyl-CoA hydratase domain-containing 1-like protein, partial [Equus caballus]	49.32	1e-52	sp|F1R6N4|ECHD1_DANRE	Ethylmalonyl-CoA decarboxylase OS=Danio rerio GN=echdc1 PE=3 SV=2	55.56	4e-20	H0YCS9	H0YCS9_HUMAN Ethylmalonyl-CoA decarboxylase (Fragment) OS=Homo sapiens GN=ECHDC1 PE=3 SV=1	CAC2712	107	1e-23	COG1024	Enoyl-CoA hydratase/carnithine racemase	I	Lipid transport and metabolism ;	K05607|1|8e-19|93.6|dwi:Dwil_GK15915|methylglutaconyl-CoA hydratase [EC:4.2.1.18]	-	GO:0016831//carboxy-lyase activity	GO:0005737//cytoplasm
233	Unigene22955_All	24 449 minus strand predicted protein [Populus trichocarpa]	18558	AYFYDTYRTLDGKYMAVGALEPQFYAKLLEGLQLSPDDVPSQMDQSEWPAMKKMFVKIFASKTQSQWSEIFDGKDACVTPVLTRDEAPHHPHNQANKSFLANQSGSYEPVPAPRLSRTPGVPATTARPEAGQHTPEIMAELG	194	18.3	-	8	8	2	2	1.212	1.335	2.415	7	7	7	-	*	*	Unigene22955_All	63.12	3e-48	gi|72042701|ref|XP_794568.1|	PREDICTED: alpha-methylacyl-CoA racemase-like [Strongylocentrotus purpuratus]	55	2e-42	sp|O09174|AMACR_MOUSE	Alpha-methylacyl-CoA racemase OS=Mus musculus GN=Amacr PE=1 SV=4	63.12	1e-47	H3J911	H3J911_STRPU Uncharacterized protein OS=Strongylocentrotus purpuratus GN=SPU_023025gn PE=4 SV=1	CC1841	128	3e-30	COG1804	Predicted acyl-CoA transferases/carnitine dehydratase	C	Energy production and conversion ;	K01796|1|1e-51|201|bfo:BRAFLDRAFT_267844|alpha-methylacyl-CoA racemase [EC:5.1.99.4]	-	-
234	CL2668.Contig3_All	141 884 hypothetical protein AURANDRAFT_27922 [Aureococcus anophagefferens]	34334	LDCALDLMRRLPPQQIEKNLSDLIDLVPDLCEDLLSSVDQPLKIARDKTVGKDYLLCDYNRDGDSFRSPWTNQYDPPLKDGAMPSEKLRKLEVEANNAFDQYRDMYFEGGVSSVYLWDLQHGFAGVILIKKAGDGSKKIQGCWDSIHVVEVMEKSSGKNAHYKLTSTAMLWLQTTKSGSGTMNLGGSLTRQVESDFAVSESAPHLTNIGRMVEDMENKIRNTLYEIYFGKTRDIVNSLRLEKSMKDDQ	522	37.9	-	39	39	8	8	0.763	1.2	1.079	34	34	33	*	*	-	CL2668.Contig3_All	100	2e-06	gi|431891329|gb|ELK02206.1|	F-actin-capping protein subunit beta [Pteropus alecto]	85.37	3e-125	sp|Q5R507|CAPZB_PONAB	F-actin-capping protein subunit beta OS=Pongo abelii GN=CAPZB PE=2 SV=2	88.55	4e-64	A7T120	A7T120_NEMVE Predicted protein (Fragment) OS=Nematostella vectensis GN=v1g14752 PE=4 SV=1	-	-	-	-	-	-	-	K10365|1|4e-126|450|oaa:100085467|capping protein (actin filament) muscle Z-line, beta	GO:0030032//lamellipodium assembly;GO:0022604//regulation of cell morphogenesis;GO:0051693//actin filament capping	GO:0003779//actin binding	GO:0005829//cytosol;GO:0030863//cortical cytoskeleton;GO:0008290//F-actin capping protein complex;GO:0030027//lamellipodium;GO:0016020//membrane
235	Unigene9297_All	246 773 calmodulin cam-211 [Daucus carota]	25417	DFLRVWEHYDADGNGFIEGKELREFFTELVECHDNPEAISPQMFDEMCNCFMEAYDENADGKIEMKELAELLRPEENFLLLFRTEELRSSVEFMETWRKYDTDKSGYIEAAELKSFIKDLLEKPRSEPGIDAAEEVPETITEEKLTKYTNIMLKLFDRNGDGKLEIKEMTRLLPVK	39	14.8	-	2	2	2	2	---	---	---	1	1	1	-	-	-	Unigene9297_All	58.72	8e-27	gi|56567182|gb|AAV98581.1|	28kDa calbindin 1 [Macaca mulatta]	53.67	9e-43	sp|P07090|CALB2_CHICK	Calretinin OS=Gallus gallus GN=CALB2 PE=2 SV=3	59.76	2e-15	H3BUW9	H3BUW9_HUMAN Calretinin (Fragment) OS=Homo sapiens GN=CALB2 PE=4 SV=1	-	-	-	-	-	-	-	K14757|1|3e-42|171|tgu:100232668|calbindin D28	GO:0006874//cellular calcium ion homeostasis	GO:0005509//calcium ion binding	-
236	CL2279.Contig1_All	84 683 glutathione s-transferase pi [Pfiesteria piscicida]	30735	KLIYFDGKARAEAIRYLFQLSGTEFEDCRVEYEKWPELKPKIGLGQLPVLEIDGTEYPQSHAAYRHLSRKFGFYGKDDHERFLIDIVCETADDLWAEIFRIFQAEKEKKPELRETFKTEGALKVTANLEKLLKKNKNGTGWFVGDGITLADVMAFNMIYDFIPFVLETKEGEFDLKDQEVLKAFVERFKSNAKISDWLKK	194	25.5	1	15	15	4	4	2.107	1.284	0.605	3	3	3	*	*	-	CL2279.Contig1_All	54.12	4e-18	gi|389611337|dbj|BAM19280.1|	glutathione S transferase S1 [Papilio polytes]	41.84	2e-18	sp|P46428|GST_ANOGA	Glutathione S-transferase OS=Anopheles gambiae GN=GstS1 PE=2 SV=4	53.12	2e-18	D3YEX2	D3YEX2_9NEOP Glutathione S-transferase sigma OS=Chilo suppressalis PE=2 SV=1	-	-	-	-	-	-	-	K01830|1|4e-25|114|xla:398969|prostaglandin-H2 D-isomerase [EC:5.3.99.2]!K00799|4|2e-21|102|cel:K08F4.11|glutathione S-transferase [EC:2.5.1.18]	-	-
237	CL984.Contig5_All	46 1143 cyclic AMP-dependent protein kinase-like protein regulatory subunit [Phytophthora sojae]	48998	DDEQSLKECEAYVQEHNIQQLLKETIIHLCIHRPDNPIGFLKDYYAKLDEESQGKANTASSASQSEDRDEDVSCTPTVPPKRLQRRGGISAEPVTEDDAASYVKKVITKDYKTMAALSKAISKNVLFAHLDEDERRDIFDCMFPQKHNAGEVVIQQGDEGDNFYVIDEGEVDVFVNSELVTTISEGGSFGELALIYGTPRQATVKGKTFLKLWGIDRDSYRRILMGSTLRKRKMYEEFLTKVSILENLDEWERLTVADSLESVQFEDQEKIVVQGEQGDDFFMIIEGQAAVLQRRAEGEDFIEVGRLGPSDYFGEIALLLDRPRAATVVARGPLKCVKLDRQRFERVLGSCGDILKRNIAQYNSFV	149	12.8	-	8	8	3	3	1.03	1.056	0.899	7	8	8	-	-	-	CL984.Contig5_All	83.33	9e-68	gi|410057575|ref|XP_001143850.3|	PREDICTED: cAMP-dependent protein kinase type I-beta regulatory subunit-like [Pan troglodytes]	73.97	1e-154	sp|P16905|KAPR1_DROME	cAMP-dependent protein kinase type I regulatory subunit OS=Drosophila melanogaster GN=Pka-R1 PE=2 SV=2	83.81	4e-99	F1QWS8	F1QWS8_DANRE Uncharacterized protein (Fragment) OS=Danio rerio GN=prkar1b PE=4 SV=1	YIL033c	201	2e-51	COG0664	cAMP-binding proteins - catabolite gene activator and regulatory subunit of cAMP-dependent protein kinases	T	Signal transduction mechanisms ;	K04739|1|4e-158|557|bfo:BRAFLDRAFT_60565|cAMP-dependent protein kinase regulator	GO:0045859//regulation of protein kinase activity;GO:0007165//signal transduction;GO:0001707//mesoderm formation	GO:0031625//ubiquitin protein ligase binding;GO:0030552//cAMP binding;GO:0008603//cAMP-dependent protein kinase regulator activity;GO:0016301//kinase activity	GO:0031594//neuromuscular junction;GO:0005952//cAMP-dependent protein kinase complex
238	Unigene54358_All	2 313 minus strand putative myosin heavy chain [Oryza sativa Japonica Group]	14927	YLNEASVLFNLKDRYFSSLIYTYSGLFCVVVNPYKRLPIYTEKVIELYRGKKRHEVPPHVYAITDTAYRSMLQDREDQSILCTGESGAGKTENTKKVIQYLAYV	515	43.3	-	17	17	4	4	0.741	1.077	0.84	15	15	15	*	-	-	Unigene54358_All	96.12	4e-53	gi|405966783|gb|EKC32023.1|	Myosin-11 [Crassostrea gigas]	92.59	3e-24	sp|Q63862|MYH11_RAT	Myosin-11 (Fragments) OS=Rattus norvegicus GN=Myh11 PE=2 SV=3	94.17	2e-51	Q8SWQ7	Q8SWQ7_LOLPE Non-muscle myosin II heavy chain OS=Loligo pealeii PE=2 SV=1	SPCC645.05c	139	9e-34	COG5022	Myosin heavy chain	Z	Cytoskeleton ;	K10352|1|7e-54|208|spu:373225|myosin heavy chain	-	GO:0005524//ATP binding;GO:0051015//actin filament binding;GO:0003774//motor activity	GO:0016459//myosin complex
239	CL2907.Contig1_All	1 482 LEN=482; translated	24073	XEKSITLPQFTMEKFISRLTDVWEAVKSEDFVFNFQNSFDALSNNRFRLHHNILIGKMKTALTGWELEQTDNLSSATKDEFFRKVEFEINERCEGVNDRIKEYVKAHSNEEEVKRRQQSILNETFDIGRDIQSAIVKHTNILLKNKEDIQHLPYFIKQAKQX	31	5.6	1	1	1	1	1	---	---	---	1	1	1	-	-	-	CL2907.Contig1_All	-	-	-	-	-	-	-	-	-	-	-	-	-	-	-	-	-	-	-	-	-	-
240	Unigene38065_All	3 167 minus strand ATP citrate lyase, subunit B [Chlamydomonas reinhardtii] >gi|158281174|gb|EDP06930.1| ATP citrate lyase, subunit B [Chlamydomonas reinhardtii]	8077	DYDFICGKETPCISAIVRPSSKQKIEEFSWGEGKVSIPVFTDIQMALKSHPQISV	31	25.5	-	1	1	1	1	---	---	---	1	1	1	-	-	-	Unigene38065_All	42.59	2e-07	gi|390336746|ref|XP_799305.3|	PREDICTED: ATP-citrate synthase-like [Strongylocentrotus purpuratus]	36.36	7e-06	sp|Q93VT8|ACLB1_ORYSJ	ATP-citrate synthase beta chain protein 1 OS=Oryza sativa subsp. japonica GN=ACLB-1 PE=2 SV=1	41.82	2e-06	E6X142	E6X142_NITSE ATP-citrate lyase/succinyl-CoA ligase OS=Nitratifractor salsuginis (strain DSM 16511 / JCM 12458 / E9I37-1) GN=Nitsa_0577 PE=4 SV=1	SPBC1703.07_1	50.4	7e-07	COG0074	Succinyl-CoA synthetase, alpha subunit	C	Energy production and conversion ;	K01648|1|6e-08|55.8|bta:511135|ATP citrate (pro-S)-lyase [EC:2.3.3.8]	GO:0006085//acetyl-CoA biosynthetic process;GO:0006633//fatty acid biosynthetic process;GO:0006101//citrate metabolic process	GO:0003878//ATP citrate synthase activity;GO:0005515//protein binding	GO:0005739//mitochondrion;GO:0005634//nucleus
241	CL10042.Contig1_All	189 2003 minus strand acyl-CoA dehydrogenase family member 9, mitochondrial precursor [Phytophthora infestans T30-4] >gi|262098374|gb|EEY56426.1| acyl-CoA dehydrogenase family member 9, mitochondrial precursor [Phytophthora infestans T30-4]	80474	KSSQESAVAQKSDNAVASSTPATGIGFAKNICLGKINKSDVFPYPEISHEDFTELNQLCEPIEKYFSEKVDSKQIDIDAKIDAETLQGLKDLGLFGQQIPEEYGGLNLNNTKYARIAEITAQDGAIGVTLAAHQAIGLKGILIAGNEAQKQKYLPRLATGELVAAFCLTEPSSGSDAASIQTRATLSPDGKHFHLNGGKIWISNGGIADVFTVFARTEVTNEKGEKQDKITGFIVERAFGGITSGKPEDKLGIRGSNTCEVHFEDTPVPIENVLGEVGSGFKLAMNILNSGRFSMGSSGSGMIRRMVAQVTEHATNRKQFNTKLKDFGLIQEKIAQMTVTAYAMESMAYLTAGMLDRPGEKDCSVEAAMVKIFSSEGCWYSVSEALQILGGLGYMKDYP…	414	16.7	-	16	16	8	8	0.996	0.728	2.095	16	16	16	-	*	-	CL10042.Contig1_All	72.94	9e-138	gi|323650076|gb|ADX97124.1|	mitochondrial acyl-CoA dehydrogenase family member 9 [Perca flavescens]	58.76	0	sp|Q8JZN5|ACAD9_MOUSE	Acyl-CoA dehydrogenase family member 9, mitochondrial OS=Mus musculus GN=Acad9 PE=2 SV=2	72.94	3e-137	F1C764	F1C764_PERFV Mitochondrial acyl-CoA dehydrogenase family member 9 (Fragment) OS=Perca flavescens GN=Acad9 PE=2 SV=1	BH3486	310	7e-84	COG1960	Acyl-CoA dehydrogenases	I	Lipid transport and metabolism ;	K15980|1|0.0|738|xtr:548505|Acyl-CoA dehydrogenase family member 9 [EC:1.3.99.-]	GO:0008152//metabolic process	GO:0016627//oxidoreductase activity, acting on the CH-CH group of donors	GO:0030425//dendrite;GO:0005739//mitochondrion;GO:0005634//nucleus
242	Unigene289_All	307 888 peptidylprolyl isomerase, precursor [Micromonas sp. RCC299] >gi|226523334|gb|ACO69316.1| peptidylprolyl isomerase, precursor [Micromonas sp. RCC299]	27905	VVLVATIYFFYPADAKKDKAEKPKVTDKVFFDVKIGDEKAGRIVIGLFGEIVPKTVENFKTLATRSGKEGYKGSKFHRVIKDFMIQGGDFTHGTGTGGKSIYGDRFEDENFKLSHYGAGWLSMANAGKNTNGSQFFITTVVTSWLDGKHVVFGKVIEGMSVVRKIEGTKVSGSTPVEPCVIVDSGVIDVDVPFE	849	33.5	-	39	39	6	6	0.939	0.971	0.957	36	36	36	-	-	-	Unigene289_All	81.25	7e-54	gi|53749651|ref|NP_998184.1|	peptidyl-prolyl cis-trans isomerase B [Danio rerio] >gi|37747992|gb|AAH59560.1| Ppib protein [Danio rerio] >gi|47937999|gb|AAH71458.1| Peptidylprolyl isomerase B (cyclophilin B) [Danio rerio] >gi|157422730|gb|AAI53470.1| Ppib protein [Danio rerio] >gi|158254297|gb|AAI54214.1| Peptidylprolyl isomerase B (cyclophilin B) [Danio rerio]	78.32	9e-53	sp|P24367|PPIB_CHICK	Peptidyl-prolyl cis-trans isomerase B OS=Gallus gallus GN=PPIB PE=2 SV=1	81.25	2e-53	Q6PBW4	Q6PBW4_DANRE Peptidyl-prolyl cis-trans isomerase OS=Danio rerio GN=ppib PE=2 SV=1	YDR304c	208	4e-54	COG0652	Peptidyl-prolyl cis-trans isomerase (rotamase) - cyclophilin family	O	Posttranslational modification, protein turnover, chaperones ;	K03768|1|5e-55|213|spu:577919|peptidyl-prolyl cis-trans isomerase B (cyclophilin B) [EC:5.2.1.8]	GO:0006457//protein folding;GO:0032504//multicellular organism reproduction;GO:0000413//protein peptidyl-prolyl isomerization	GO:0042277//peptide binding;GO:0003755//peptidyl-prolyl cis-trans isomerase activity	GO:0005615//extracellular space;GO:0005875//microtubule associated complex;GO:0005788//endoplasmic reticulum lumen;GO:0005811//lipid particle
243	Unigene9351_All	1 460 LEN=460; translated	19942	VVVDDDTILSVSRLLRLLSCYDAMEEVVLGERYGYGHGRMIGYDYVTGGGGMVFSRSAVSSFIDKGIKCSRHEDPDDMIIGMFAKSYQIPITHCPLFHQSQPQQYALGFLKHQTPISFHKHTNLDPYEVYQTWFYRDDEAARKHESLSREGLRX	30	9.1	-	1	1	1	1	---	---	---	1	1	1	-	-	-	Unigene9351_All	70.59	9e-09	gi|390361440|ref|XP_781188.2|	PREDICTED: beta-1,3-glucosyltransferase-like [Strongylocentrotus purpuratus]	52.94	1e-31	sp|Q6Y288|B3GLT_HUMAN	Beta-1,3-glucosyltransferase OS=Homo sapiens GN=B3GALTL PE=1 SV=2	70.59	5e-08	H3IPD1	H3IPD1_STRPU Uncharacterized protein OS=Strongylocentrotus purpuratus GN=SPU_016018gn PE=4 SV=1	-	-	-	-	-	-	-	K13675|1|4e-36|150|xla:100127336|UDP-glucose:O-linked fucose beta-1,3-glucosyltransferase [EC:2.4.1.-]	-	GO:0016740//transferase activity	GO:0016020//membrane
244	Unigene8392_All	486 1673 minus strand epocide hydrolase domain-containing protein [Coccomyxa subellipsoidea C-169]	52904	KITFSQKDQDDLKRRLQNTRYFESLEGTNWNYGVRADSMKVIVNHWLTNYSWPKQEKVLNQFNHFKTNIEGIDIHFLHVKPKVKPGQKVKQILMVHGWPGSFYEFYKVIPMLTDPTNHGGTEDDVFEVICPSLPGYGFSEEAHKPGMGPIQIARIFNTLMHERLGFDNYYVQGGDWGSTVVEFMSLFFPQYIRGHHNNFLMVTPPWMGLRLLVGHFFPEWSYPRIRDRKLFSPLGERLLVIMRESGYFHIQATKPDTIGQALTDSPAGLAAYIFEKFSLPTNPDYINYPDGKLTERFELDDLLNNVMVHWIGGRFTASMRSYKEIIQLYPTLMPLQRLVITVPTGYAAFPHEASGTPEHWLKYRFANVVSYSLLPDGGHFAALEQPKLFAEDLRKF	1065	38.9	-	46	10	10	6	1.801	0.963	2.791	9	10	9	*	-	-	Unigene8392_All	52.7	3e-108	gi|260788133|ref|XP_002589105.1|	hypothetical protein BRAFLDRAFT_278838 [Branchiostoma floridae] >gi|229274279|gb|EEN45116.1| hypothetical protein BRAFLDRAFT_278838 [Branchiostoma floridae]	47.49	3e-102	sp|P07099|HYEP_HUMAN	Epoxide hydrolase 1 OS=Homo sapiens GN=EPHX1 PE=1 SV=1	52.7	1e-107	C3ZQS0	C3ZQS0_BRAFL Putative uncharacterized protein OS=Branchiostoma floridae GN=BRAFLDRAFT_278838 PE=4 SV=1	CAC0719	248	9e-66	COG0596	Predicted hydrolases or acyltransferases (alpha/beta hydrolase superfamily)	R	General function prediction only ;	K01253|1|5e-103|375|bfo:BRAFLDRAFT_213876|microsomal epoxide hydrolase [EC:3.3.2.9]	-	-
245	Unigene25650_All	127 777 PREDICTED: vacuolar protein sorting-associated protein 45 homolog [Cucumis sativus] >gi|449518378|ref|XP_004166219.1| PREDICTED: vacuolar protein sorting-associated protein 45 homolog [Cucumis sativus]	29857	MNVIQAVKLYISKMIEDSGPGMKVLLMDQETISFVSMVYAQSEILQKEVYLFELIGNRNRETMKHLRAICFLRPTPENIDLLKRELTIPKYGVYFIYFSNVISKSEIKGLAEADAQEVVREVQEFYGDYLAISPHAFSLGIPNCSRHSNWKPALLSRACEGLTAVLLSLKKCPMIRYQNSSEMAKKLAETIKQTIARDTSLFDFRRTDVSPLLLILD	98	6	-	3	3	1	1	0.917	0.954	1.351	3	2	3	-	-	-	Unigene25650_All	75.81	5e-48	gi|55959178|emb|CAI14266.1|	vacuolar protein sorting 45 homolog (S. cerevisiae) [Homo sapiens]	72.35	5e-89	sp|O08700|VPS45_RAT	Vacuolar protein sorting-associated protein 45 OS=Rattus norvegicus GN=Vps45 PE=2 SV=1	76.61	7e-48	E2QV43	E2QV43_CANFA Uncharacterized protein OS=Canis familiaris GN=VPS45 PE=4 SV=1	SPAC2G11.03c	179	5e-45	COG5158	Proteins involved in synaptic transmission and general secretion, Sec1 family	U	Intracellular trafficking, secretion, and vesicular transport ;	K12479|1|3e-91|334|spu:587303|vacuolar protein sorting-associated protein 45	GO:0007596//blood coagulation;GO:0006904//vesicle docking involved in exocytosis;GO:0006886//intracellular protein transport	GO:0005515//protein binding	GO:0000139//Golgi membrane;GO:0016021//integral to membrane;GO:0010008//endosome membrane
246	CL7599.Contig2_All	299 1369 minus strand 1-acyl-sn-glycerol-3-phosphate acyltransferase PLS1, putative, expressed [Oryza sativa Japonica Group] >gi|215769113|dbj|BAH01342.1| unnamed protein product [Oryza sativa Japonica Group]	50066	ILTHLYFFVVFIISGLIVNILQVFTLLLWPVSKSLYRKANGYLVYLHWAQLVFLYDTYSGSHIYIHCDDKFFTAMNKQHGLLVMNHTFELDWLATWCVADRYGQLFSAKCFMKNELKYVPLVGWSFYLLEMPFLKRDFVKDREQLVEGVKLLADFPMPAKMLMFCEGTRFTPEKYEKSKAFAEKKGLPILKHHLTPRTKGFCMAVEGLKGRVPVIMDATVACQKNDSATVYDLLLGKRVTYHAFVKIRSMDEVPTDSEEETSNYCHQLYQEKDNAMDYFMKNDTFHGYDDTMKQHFIPPRIQPTLVAMFWYASLGTLIIYYLLKLLLTGSMLTILIAVLVVFLLQLGFHRMMSVAVA	121	9	-	7	7	3	3	0.648	1.044	2.781	6	6	6	-	-	*	CL7599.Contig2_All	50.48	3e-59	gi|115704902|ref|XP_001200709.1|	PREDICTED: 1-acyl-sn-glycerol-3-phosphate acyltransferase gamma-like [Strongylocentrotus purpuratus]	40.76	4e-63	sp|Q5R757|PLCD_PONAB	1-acyl-sn-glycerol-3-phosphate acyltransferase delta OS=Pongo abelii GN=AGPAT4 PE=2 SV=1	51.22	2e-58	H3J744	H3J744_STRPU Uncharacterized protein OS=Strongylocentrotus purpuratus GN=SPU_022349gn PE=4 SV=1	SPBC428.14	97.4	3e-20	COG0204	1-acyl-sn-glycerol-3-phosphate acyltransferase	I	Lipid transport and metabolism ;	K13523|1|9e-90|330|spu:586692|lysophosphatidic acid acyltransferase / lysophosphatidylinositol acyltransferase [EC:2.3.1.51 2.3.1.-]	-	-
247	Unigene17673_All	1 437 LEN=437; translated	20224	XYFDYPPAQIDLLQNKDSRNHLMVRYMEERGQITETDISTLLYALKVLNLHGIQKKAQTLFELHTGKRCTGDDQSMQQPEDLNFGKLDLGSKESFTSDFTSLGLASFSSADQHNITLENGKLVPVSSTLEELQIKTNKGKEFTQDQ	114	9.6	-	3	3	1	1	1.383	0.751	0.903	2	3	3	*	-	-	Unigene17673_All	-	-	-	-	-	-	-	-	-	-	-	-	-	-	-	-	-	-	-	-	-	-
248	Unigene46427_All	15 314 minus strand chaperonin cpn60 [Ectocarpus siliculosus]	13998	LGTAKSIVSRKDRSSIVTLPEAKVAIDQRIERLRTDMDKETSKFEREKLNERIAALSGGIAKILIGAATETEQKEKRLRYEDAISAVRAAMETGYVPGGG	15	12	-	1	1	1	1	---	---	---	-	-	-	-	-	-	Unigene46427_All	69	5e-33	gi|221486035|gb|EEE24305.1|	chaperonin-60kD, ch60, putative [Toxoplasma gondii GT1]	58	1e-29	sp|P34940|CH60_PLAFG	Chaperonin CPN60, mitochondrial OS=Plasmodium falciparum (isolate FCR-3 / Gambia) PE=3 SV=1	69	2e-32	B9PN93	B9PN93_TOXGO Chaperonin-60kD, ch60, putative OS=Toxoplasma gondii GN=TGGT1_050270 PE=3 SV=1	lin2174	98.6	2e-21	COG0459	Chaperonin GroEL (HSP60 family)	O	Posttranslational modification, protein turnover, chaperones ;	K04077|1|2e-16|84.3|smm:Smp_008545|chaperonin GroEL	GO:0042026//protein refolding	GO:0005524//ATP binding	GO:0020011//apicoplast
249	CL6866.Contig1_All	15 287 minus strand predicted protein [Bathycoccus prasinos]	12085	GAAKIVEPGTGSIVSAVETAAGRDALVLGKPHKFMVDLIKEKFTLEPRRTVMVGDRLNTDIQLGKNADLHTLLVLTGVSKLSDVDSNLESS	123	24.2	1	9	9	2	2	1.663	0.972	1.164	6	6	6	*	-	-	CL6866.Contig1_All	62.03	4e-21	gi|470319957|ref|XP_004348759.1|	predicted protein [Capsaspora owczarzaki ATCC 30864] >gi|320167085|gb|EFW43984.1| predicted protein [Capsaspora owczarzaki ATCC 30864]	56.1	1e-18	sp|Q2T9S4|PGP_BOVIN	Phosphoglycolate phosphatase OS=Bos taurus GN=PGP PE=2 SV=1	62.03	2e-20	E9C370	E9C370_CAPO3 Predicted protein OS=Capsaspora owczarzaki (strain ATCC 30864) GN=CAOG_02009 PE=4 SV=1	TM1742	75.1	3e-14	COG0647	Predicted sugar phosphatases of the HAD superfamily	G	Carbohydrate transport and metabolism ;	K01091|1|4e-21|99.8|spu:760243|phosphoglycolate phosphatase [EC:3.1.3.18]!K07758|4|7e-21|99.0|gga:771207|pyridoxal phosphatase [EC:3.1.3.74]	GO:0060548//negative regulation of cell death;GO:0006855//drug transmembrane transport;GO:0072089//stem cell proliferation;GO:0006200//ATP catabolic process;GO:0000086//G2/M transition of mitotic cell cycle	GO:0016791//phosphatase activity;GO:0042626//ATPase activity, coupled to transmembrane movement of substances	GO:0000139//Golgi membrane;GO:0016021//integral to membrane;GO:0009986//cell surface;GO:0046581//intercellular canaliculus;GO:0016324//apical plasma membrane
250	CL8480.Contig2_All	554 2002 hypothetical protein VOLCADRAFT_120428 [Volvox carteri f. nagariensis] >gi|300267637|gb|EFJ51820.1| hypothetical protein VOLCADRAFT_120428 [Volvox carteri f. nagariensis]	63262	HDTAGWKNLETWMRCLQAVVEGCGPGFLSYIDQDLLDLVFGTLTHTNRFVRETGYYVCAAIVSCNGREGENVSTDLSENTILKYGQDFSQHFANGLADNWSQVRLAASVATRQFLTNMPSEESRHEFFGILVPRLCLNRYYVAEGVKIYCQETWRQIVGEQGKALVEKYIEEVVNFYVEQSDADNHAVREAACACIAELGSKIDKEKVRPYVQRLLTALLICFEDDSWPVRDAACVACGNFILCFPDESSSYMEKLLPLFFGNLEDNILSVRQGAAISLGKVANVYGNEVEKKLLEKVQEGFDGVENQDSFAKNFGGLESTPATFGVVKSLRDNDVELHSDKQMYSCGSLAPKMGKGREGGCMDHKFRKPSEPWELGDGCINLLAELSSIPRLSQQVSN…	255	9.3	-	13	13	4	4	0.722	1.211	1.25	13	13	13	-	-	-	CL8480.Contig2_All	67.12	1e-22	gi|156345493|ref|XP_001621381.1|	hypothetical protein NEMVEDRAFT_v1g222046 [Nematostella vectensis] >gi|156207247|gb|EDO29281.1| predicted protein [Nematostella vectensis]	-	-	-	-	67.12	5e-22	A7T431	A7T431_NEMVE Predicted protein (Fragment) OS=Nematostella vectensis GN=v1g222046 PE=4 SV=1	-	-	-	-	-	-	-	-	-	-
251	Unigene8350_All	685 1527 PREDICTED: protein-tyrosine kinase 2-beta-like [Fragaria vesca subsp. vesca]	38503	PVHRNSSEGQNRQNIAPSHVPNVQIPSNLMIRADELKLGAEIGRGFFGAVYDGEYKGQKVAVKMLQDAAASQAFMEEAHIMSKLKNAFLVDLIGISDKYIVLEFMAKGNLRDYLRTRGRAMITNDMQLKFALDVVRGMVYLESHHFAHRDLAARNILISSDDVAKVSDFGMAQGDGANLVGGKIPVKWTAPEAIRQKIFTNKSDVWSFGVLLWEMYSFGKVPYPRIPADEVISFLEEGSRMPIPEDCPKAMYKIMMECWEWEATKRPKFSEIEQKLLNLAK	107	11.7	-	3	3	2	2	0.42	1.003	0.766	3	2	2	-	-	-	Unigene8350_All	55.65	9e-76	gi|18150824|dbj|BAA81712.3|	protein tyrosine kinase [Ephydatia fluviatilis]	51.76	5e-76	sp|Q0VBZ0|CSK_BOVIN	Tyrosine-protein kinase CSK OS=Bos taurus GN=CSK PE=2 SV=1	62.07	1e-65	H3HQT2	H3HQT2_STRPU Uncharacterized protein OS=Strongylocentrotus purpuratus GN=SPU_004037gn PE=3 SV=1	L138452_1	101	2e-21	COG0515	Serine/threonine protein kinase	RTKL	General function prediction only ; Signal transduction mechanisms ; Transcription ; Replication, recombination and repair ;	K05728|1|5e-76|284|bta:509246|c-src tyrosine kinase [EC:2.7.10.2]	GO:0045779//negative regulation of bone resorption;GO:0042997//negative regulation of Golgi to plasma membrane protein transport;GO:0033673//negative regulation of kinase activity;GO:0007420//brain development;GO:0043406//positive regulation of MAP kinase activity;GO:0031295//T cell costimulation;GO:0030168//platelet activation;GO:0048709//oligodendrocyte differentiation;GO:0070373//negative regu…	GO:0004713//protein tyrosine kinase activity;GO:0008022//protein C-terminus binding;GO:0070064//proline-rich region binding;GO:0005524//ATP binding;GO:0019903//protein phosphatase binding	GO:0005829//cytosol;GO:0045121//membrane raft;GO:0005886//plasma membrane;GO:0005911//cell-cell junction;GO:0005794//Golgi apparatus;GO:0005813//centrosome
252	Unigene25468_All	389 3649 PREDICTED: ubiquitin carboxyl-terminal hydrolase 12-like [Solanum lycopersicum]	153813	PEQTKPDDMPAAVTDTQKSESVPAEGEEVTMNGDIKVGEDGQEEEEDDTLVEDDSRSEATFRHVVQSISKLKDTSLSTPCIVRNLPWKIMAMLRTTQSGDRPSKSLGFFLQCNGESESQSWSCQATAELRLINQSGGQDHVRKIMHLFYFKENDWGFSHFLSWNEMLDEEKGFVKDDTIILEAHVTADAPHGVSWDSKKLTGHVGLKNQGATCYMNSLLQCLFFTNKLRKAVYLMPTENDDSSRSVPLALQRVFYELQHSDKPVSTKKLTKSFGWETLDSFMQHDVQEFCRVLLDNIESKMKSTCVEGIIPKVFEGKMISYIKCKHINYESIRSEPFYDVQLNIKGKKNVYESFKDYIATEKLEGENKYDAGDNGLQEAAKGVIFTRFPPLLHLQLMRF…	500	17.6	-	29	29	16	16	0.896	0.827	0.886	27	27	27	-	*	-	Unigene25468_All	74.1	7e-135	gi|307166164|gb|EFN60413.1|	Ubiquitin carboxyl-terminal hydrolase 7 [Camponotus floridanus]	60.17	0	sp|Q6U7I1|UBP7_CHICK	Ubiquitin carboxyl-terminal hydrolase 7 OS=Gallus gallus GN=USP7 PE=2 SV=1	74.1	3e-134	E2B1Q7	E2B1Q7_CAMFO Ubiquitin carboxyl-terminal hydrolase 7 OS=Camponotus floridanus GN=EAG_02125 PE=4 SV=1	SPBC713.02c	538	2e-152	COG5077	Ubiquitin carboxyl-terminal hydrolase	O	Posttranslational modification, protein turnover, chaperones ;	K11838|1|0.0|1411|spu:575057|ubiquitin carboxyl-terminal hydrolase 7 [EC:3.1.2.15]	GO:0016579//protein deubiquitination;GO:0006283//transcription-coupled nucleotide-excision repair;GO:0032088//negative regulation of NF-kappaB transcription factor activity	GO:0004197//cysteine-type endopeptidase activity;GO:0002039//p53 binding;GO:0008022//protein C-terminus binding;GO:0004843//ubiquitin-specific protease activity;GO:0031625//ubiquitin protein ligase binding;GO:0004221//ubiquitin thiolesterase activity;GO:0008134//transcription factor binding	GO:0005829//cytosol;GO:0005634//nucleus
253	Unigene22001_All	97 1041 SUMO-activating enzyme (SAE), putative [Phytophthora infestans T30-4] >gi|262108702|gb|EEY66754.1| SUMO-activating enzyme (SAE), putative [Phytophthora infestans T30-4]	45684	EAELYDRQIRLWGLDAQKRLRVTKMLLVGLGGLGAEVCKNIVLAGIKSITLMDDQIVTEADFFSQFLITREDVGKNRATASVARVQELNPNVIVTSNETSVTDKEEAFFKQFDIVCLTYCKPETIVKVNTFCHENNIQFFGGDIFGFYGYSFSDLNEHNYVEEKPKKNKGSSGEGPSKKQKVDATETVFIKRTMHFTRFKEALEKKWGGIPEKEMKRVPPVFFMLQVLLKFESVMGRRPKPQSAENDRCKILELKKEVLQSLDVKEDYLKDDFASLVAGELSPVCAIVGGILGQEVIKAASQKNPPHNNFFFYDG	96	10.5	-	4	4	3	3	0.866	0.88	1.742	2	2	2	-	-	*	Unigene22001_All	62.66	3e-97	gi|72041402|ref|XP_794964.1|	PREDICTED: SUMO-activating enzyme subunit 1-like [Strongylocentrotus purpuratus]	51.1	6e-75	sp|Q9UBE0|SAE1_HUMAN	SUMO-activating enzyme subunit 1 OS=Homo sapiens GN=SAE1 PE=1 SV=1	62.66	1e-96	H3I6U5	H3I6U5_STRPU Uncharacterized protein OS=Strongylocentrotus purpuratus GN=SPU_009761gn PE=4 SV=1	YPR180w	169	4e-42	COG0476	Dinucleotide-utilizing enzymes involved in molybdopterin and thiamine biosynthesis family 2	H	Coenzyme transport and metabolism ;	K10684|1|4e-98|358|spu:590262|ubiquitin-like 1-activating enzyme E1 A [EC:6.3.2.19]	GO:0016925//protein sumoylation;GO:0016567//protein ubiquitination;GO:0043085//positive regulation of catalytic activity	GO:0004839//ubiquitin activating enzyme activity;GO:0008047//enzyme activator activity;GO:0043008//ATP-dependent protein binding;GO:0008022//protein C-terminus binding;GO:0019948//SUMO activating enzyme activity;GO:0046982//protein heterodimerization activity	-
254	CL9016.Contig2_All	160 789 hypothetical protein AURANDRAFT_22362 [Aureococcus anophagefferens]	26449	ALVLARGGSKGIPLKNIKPLAGLPLVAWCLRALLDSGEFDSVWVSTDHDEIARISQEWGAQVFRRSAQTAADKSPSIDAVKEFATHHPEVDYIAQVQCTSPCLHPFHVAGPCRMMREEGFDSVFAVTRRHGFRWQEVHGGGKTAPLNLDPKNRPRRQDWDGELIENGSFYFATRELILDGLFQGGKIGYFEMQAEYSVDIDTDIDWPIAE	177	13.3	-	8	8	2	2	0.886	0.759	1.055	7	7	7	-	-	-	CL9016.Contig2_All	76.92	7e-09	gi|47213955|emb|CAF94053.1|	unnamed protein product [Tetraodon nigroviridis]	65.57	6e-79	sp|Q90WG6|NEUA_ONCMY	N-acylneuraminate cytidylyltransferase OS=Oncorhynchus mykiss GN=cmas PE=2 SV=1	70.14	4e-83	Q0E669	Q0E669_STRPU Putative CMP-sialic acid synthetase OS=Strongylocentrotus purpuratus GN=cmas PE=2 SV=1	MA3766_1	142	3e-34	COG1083	CMP-N-acetylneuraminic acid synthetase	M	Cell wall/membrane/envelope biogenesis ;	K00983|1|2e-84|311|spu:588508|N-acylneuraminate cytidylyltransferase [EC:2.7.7.43]	GO:0006055//CMP-N-acetylneuraminate biosynthetic process	GO:0008781//N-acylneuraminate cytidylyltransferase activity	GO:0005634//nucleus
255	CL1351.Contig3_All	1 1359 LEN=3391; minus strand; translated	60555	LLPLSQTQVTKQDKAIAATLDLVIHMPAKIPXGVKTSRSKMEDLHRKAIRANYVILSKDLELELVMPSLIQDGIYEPFMSDTFKAKGGKLAQNQALLNSIETRGPKAYKAFISALTSAGQGHLAEAIRKKETTQPSTKPSEHHYEPMQTESLVSQPTDAGVWPNPGIPAVLEQYHIPKVPVKTEMVDSNEVYRMSSNPRGLALIINNMKFRTMPERRGTEVDGRNLHHVFKELGFNVDTRTNLKGQEMATFIREFAKMNHSTFDCVILAILTHGVEGALYGVDEKKLAVEDVFKYFDATRAPTLIGKPKIVILQACRGERFDKGVESTDASGAGYVEETAPPPRENGDQDANALVDSMLRLEFEAPDAFASARSKVPSMSDMLIAYATVPGYVSWRNSE…	94	6	1	6	6	4	4	0.766	0.714	0.635	3	3	3	-	-	-	CL1351.Contig3_All	57.68	3e-89	gi|390368767|ref|XP_792621.3|	PREDICTED: caspase-like [Strongylocentrotus purpuratus]	42.03	2e-50	sp|P45436|CED3_CAERE	Cell death protein 3 OS=Caenorhabditis remanei GN=ced-3 PE=3 SV=1	57.68	1e-88	H3HJ71	H3HJ71_STRPU Uncharacterized protein OS=Strongylocentrotus purpuratus GN=SPU_001683gn PE=3 SV=1	-	-	-	-	-	-	-	K04399|1|2e-58|227|tgu:100227981|caspase 9 [EC:3.4.22.62]!K02186|2|4e-57|222|xla:397817|caspase 2 [EC:3.4.22.55]	GO:0009987//cellular process	GO:0008233//peptidase activity	-
256	Unigene1080_All	1 695 LEN=973; translated	31835	GGGGGGGAASGGGGLGGGLAAALAATKLKKTVREEGGDAPPPAKKGGGMQDMMSEIQMKLKKRQQTQNTEEAKPPGRTSPPPVQNKDTNRKPWERNNPAPVANRTKVNGVPDGSSSPKISRVARRGSMQNGNDSDLEKMKQEILTEMRKEMQKLKVEIIDAIKQELRQKLRINPTNEQQVISSENVDPGLGESCRQRSQMGYLKYLQFGDWTIHSPNSVQQAAGRQHNYAYV	122	4.3	-	7	7	2	2	0.688	0.938	1.033	6	6	6	-	-	-	Unigene1080_All	60	4e-06	gi|296209796|ref|XP_002751693.1|	PREDICTED: vasodilator-stimulated phosphoprotein-like [Callithrix jacchus]	43.56	6e-09	sp|Q03173|ENAH_MOUSE	Protein enabled homolog OS=Mus musculus GN=Enah PE=1 SV=2	48.81	3e-07	H0V8V4	H0V8V4_CAVPO Uncharacterized protein (Fragment) OS=Cavia porcellus GN=ENAH PE=4 SV=1	-	-	-	-	-	-	-	K05746|1|3e-09|62.4|acs:100555779|enabled!K06274|5|6e-09|61.2|cfa:403936|vasodilator-stimulated phosphoprotein	GO:0009653//anatomical structure morphogenesis;GO:0008154//actin polymerization or depolymerization;GO:0065008//regulation of biological quality;GO:0006461//protein complex assembly;GO:0006928//cellular component movement;GO:0050896//response to stimulus;GO:0030154//cell differentiation;GO:0007399//nervous system development	GO:0005522//profilin binding;GO:0017124//SH3 domain binding	GO:0005925//focal adhesion;GO:0030027//lamellipodium;GO:0015629//actin cytoskeleton;GO:0005737//cytoplasm
257	Unigene2995_All	6 695 hypothetical protein GUITHDRAFT_86988 [Guillardia theta CCMP2712]	32907	GPRELVTGSRDGSVKVWDPRQKDDPVACMKPKEGETKRDCWSVAFGHAHNQMDRCVAAGYDNGDIKLFDLKNMSLRWDTNVKNGVCFVEFDRKDINMNKLVATVLESKIHVFDMRTQHPKKGFAKMTEKAHDSTVWAAKHLPQNRDIFMTLGGNGSAYLWKYQYPANRVAKDSDEIEMGVAGTLNLLENTTLSKQPINALDWSPDKEGLAVCTAFDQCVRVLIVTKLARV	26	3	-	1	1	1	1	---	---	---	-	-	-	-	-	-	Unigene2995_All	85.19	3e-07	gi|405955292|gb|EKC22462.1|	WD repeat-containing protein 92 [Crassostrea gigas]	74.01	1e-102	sp|Q561Y0|WDR92_DANRE	WD repeat-containing protein 92 OS=Danio rerio GN=wdr92 PE=2 SV=1	86.67	3e-07	E2R5B8	E2R5B8_CANFA Uncharacterized protein OS=Canis familiaris GN=Cfa.5856 PE=4 SV=1	-	-	-	-	-	-	-	-	GO:0034968//histone lysine methylation;GO:0006915//apoptotic process	GO:0035064//methylated histone residue binding	-
258	Unigene4724_All	151 1176 minus strand PREDICTED: ribose-phosphate pyrophosphokinase-like [Cucumis sativus]	44133	MILFAGNSHRELAQSVADKLGIELGKADIYIQDNKETAVDIKESVRGKDVFILAAGSRDVNNLIMELLILTYACKTSCARSIIAVVPYLPYSQQSQMRKRGSIVAKLLATMLGKSGITNMITMDLHHKEIQGFYNLPVDNLRASPFLVQYITENIPDWRNAIIVARNPGAAKRATSYSDRLRLGLAVIHGEQKDAEQENIDGRHSPPPFVAPKPATAMEVIPFFTQKEKPPINVVGDVTGRIAIVVDDIIDDAEPFIAAGDVLKERGAYKVYLILTHGILSGDAPKLLEQSCIDEIVVTNTLPLDVQRLQCNKIRTVDISLLLAESIRRIHNGESMSYLFRN	102	7	-	3	3	2	2	0.915	1.149	1.066	3	3	3	-	-	-	Unigene4724_All	75	3e-11	gi|410917187|ref|XP_003972068.1|	PREDICTED: phosphoribosyl pyrophosphate synthase-associated protein 1-like isoform 3 [Takifugu rubripes]	64.37	3e-127	sp|Q28DH0|KPRB_XENTR	Phosphoribosyl pyrophosphate synthase-associated protein 2 OS=Xenopus tropicalis GN=prpsap2 PE=2 SV=1	70.61	1e-119	H3JGX8	H3JGX8_STRPU Uncharacterized protein OS=Strongylocentrotus purpuratus GN=SPU_025831gn PE=4 SV=1	SPCC1620.06c	282	7e-76	COG0462	Phosphoribosylpyrophosphate synthetase	FE	Nucleotide transport and metabolism ; Amino acid transport and metabolism ;	K00948|1|6e-76|284|tad:TRIADDRAFT_25357|ribose-phosphate pyrophosphokinase [EC:2.7.6.1]	GO:0009165//nucleotide biosynthetic process	GO:0004749//ribose phosphate diphosphokinase activity;GO:0000287//magnesium ion binding	GO:0002189//ribose phosphate diphosphokinase complex
259	CL2655.Contig1_All	13 1851 PREDICTED: pre-mRNA-processing protein 40C-like [Cucumis sativus]	87353	LPTPAVGGSDPPSSTQGQTKLSTSIAAPLQSSAVGQTQPSTVTSGPPPILNSMPPMGMGQRPPNLHPPGLGGMPPAGALGNAPPMMHRPLMGLHPPGMMPPGGGMPPHARFMGPPMMHPRMPVPPGLPPVQGFGGPPPFSMPGMPHQPPAGMPHPGMHPLMPPLGGVPPVMHPVHAAGPMTQQPPVTIQQATATVDSNTGDAKQQAPKETVSKGDWTEYKSPEGRTYYYNSKTMQSTWEKPKELEVNQKQAEASAKKSTDAGSKVTTSSPGEEEGMEVDEEVQTKEIKKEKNVDEVKVETDVKEETKPEITTNEEKTQEEDESTKSTIKIKEEKEEVKVKEEKPAEDTRTEEEKAAERARPIATKPVPGTPWCLVWTGDGRVFYYNPSCKLSLWEKPED…	45	2.9	1	3	3	2	2	0.693	0.692	0.848	3	3	3	-	-	-	CL2655.Contig1_All	85.94	3e-25	gi|159164278|pdb|2DOD|A	Chain A, Solution Structure Of The First Ff Domain Of Human Transcription Factor Ca150	75.86	1e-06	sp|Q9R1C7|PR40A_MOUSE	Pre-mRNA-processing factor 40 homolog A OS=Mus musculus GN=Prpf40a PE=1 SV=1	79.66	4e-19	B0W6C6	B0W6C6_CULQU Transcription elongation regulator 1 OS=Culex quinquefasciatus GN=CpipJ_CPIJ002677 PE=4 SV=1	-	-	-	-	-	-	-	K12824|1|8e-71|268|xtr:100498472|transcription elongation regulator 1	-	-
260	Unigene19040_All	23 454 predicted protein [Chlamydomonas reinhardtii] >gi|158277946|gb|EDP03712.1| predicted protein [Chlamydomonas reinhardtii]	20991	YCLNCRLQTTVDDSUGKSELNMASAEEKFAAAVQAIKKLPKDGPFQPSYDMMKKFYGLFKQATEGPCNEPRPAFWNAIKKAKWEAWSSLGDMSKLEAQEGYVNEMLKIIEAMPQTDEVRNFLRVMGPFFEMVTVTEDGKVQNGG	23	8.3	-	1	1	1	1	---	---	---	1	1	1	-	-	-	Unigene19040_All	65.38	1e-36	gi|432930235|ref|XP_004081387.1|	PREDICTED: acyl-CoA-binding domain-containing protein 5A-like [Oryzias latipes]	58.88	2e-33	sp|Q5XG73|ACBD5_MOUSE	Acyl-CoA-binding domain-containing protein 5 OS=Mus musculus GN=Acbd5 PE=1 SV=1	65.38	3e-35	H2MC37	H2MC37_ORYLA Uncharacterized protein OS=Oryzias latipes GN=ACBD5 (1 of 2) PE=4 SV=1	RSc1366	52.4	3e-07	COG4281	Acyl-CoA-binding protein	I	Lipid transport and metabolism ;	K13239|1|7e-15|79.3|ecb:100059161|peroxisomal 3,2-trans-enoyl-CoA isomerase [EC:5.3.3.8]	-	GO:0005488//binding	GO:0016020//membrane;GO:0043231//intracellular membrane-bounded organelle
261	Unigene38678_All	3 203 minus strand acyl-CoA dehydrogenase [Galdieria sulphuraria]	9514	KQYEASKTHDMPAMNKLMEWLPTQVPKTDETTVVHGDFRVDNMIFHPTEPKVLAVLDWELSTLGDPL	111	34.3	-	6	6	2	2	2.628	0.99	1.395	3	3	4	-	-	*	Unigene38678_All	74.63	4e-25	gi|390349765|ref|XP_792854.3|	PREDICTED: acyl-CoA dehydrogenase family member 10 [Strongylocentrotus purpuratus]	70.15	5e-24	sp|Q6JQN1|ACD10_HUMAN	Acyl-CoA dehydrogenase family member 10 OS=Homo sapiens GN=ACAD10 PE=2 SV=1	76.79	3e-20	Q2G7M7	Q2G7M7_NOVAD Aminoglycoside phosphotransferase OS=Novosphingobium aromaticivorans (strain DSM 12444) GN=Saro_1706 PE=4 SV=1	CC0299	104	3e-23	COG3173	Predicted aminoglycoside phosphotransferase	R	General function prediction only ;	K11729|1|4e-27|119|spu:588060|acyl-CoA dehydrogenase family member 10	GO:0055114//oxidation-reduction process	GO:0050660//flavin adenine dinucleotide binding;GO:0016772//transferase activity, transferring phosphorus-containing groups;GO:0016787//hydrolase activity;GO:0003995//acyl-CoA dehydrogenase activity	GO:0005739//mitochondrion
262	CL2178.Contig1_All	3 1319 minus strand TPA: hypothetical protein ZEAMMB73_165833 [Zea mays]	60601	HVHAASCMNQKHLLRFIKKKMKNDKEVQAYYDKSKKKVMTLHEVFESMNLTAYDMNVDTLDVHADRNTFHRFDKFNAKYNPIGESKLREIFIKTDNYMEGRYFAELIKEVAFDLEECKYQNAEYRLSIYGRSREEWDNLAKWGVHHKVYSDNIRWLIQVPRLYDVYRANKLVSNFGEVLDNLFLPLFEATRDPKSHPELHQFLKYVSGFDSVDDESKPEGQAFTKNTPEPTEWTGSENPPYSYYLFYMYANLVTLNSFRRERGMNTFVLRPHCGEAGPIHHLVAAFILSENISHGLLLRKSPVLQYLYYLSQIGIAMSPLSNNSLFLNYHRNPLPEFHARGLCVSLSTDDPLQFHFTKEPLMEEYSIAAQVWKLTTCDMCELARNSVVMSGFEEEVKEH…	40	4.8	-	2	2	2	2	---	---	---	1	1	1	-	-	-	CL2178.Contig1_All	81.55	0	gi|390333586|ref|XP_792615.3|	PREDICTED: AMP deaminase 2-like [Strongylocentrotus purpuratus]	73.58	0	sp|Q9DBT5|AMPD2_MOUSE	AMP deaminase 2 OS=Mus musculus GN=Ampd2 PE=1 SV=1	81.55	0	H3HP17	H3HP17_STRPU Uncharacterized protein OS=Strongylocentrotus purpuratus GN=SPU_003415gn PE=4 SV=1	YML035c	557	1e-158	COG1816	Adenosine deaminase	F	Nucleotide transport and metabolism ;	K01490|1|0.0|757|spu:587814|AMP deaminase [EC:3.5.4.6]	GO:0032264//IMP salvage;GO:0006144//purine nucleobase metabolic process	GO:0003876//AMP deaminase activity;GO:0046872//metal ion binding	GO:0005829//cytosol
263	Unigene969_All	3 695 minus strand Ca2+ binding protein cbp1 [Triticum aestivum]	35147	LRSQLEQWLALHLNEQIPTSLLLLSRALYLPEHLSAPDALQATIASLPEETAAEAKLKLAEMEGEKVDNTERLKVIKKEEEVIKQEKKEKQEIAKQEQEKKAAAAEAELMKDKAEEELVDKAPILEPVPTKEIVTPDKEEEVSKEELQGIGEVISKIAQEKESLSQEKEDLEELKQDVEEYKEDLEDLKKEQEEDTNLRTLSESKASLRMSKQVNRMMGRLDSIVSELEVE	40	4.3	-	1	1	1	1	---	---	---	1	1	1	-	-	-	Unigene969_All	82.19	2e-07	gi|390349617|ref|XP_781116.3|	PREDICTED: LETM1 and EF-hand domain-containing protein 1, mitochondrial-like [Strongylocentrotus purpuratus]	45.54	3e-12	sp|Q1LY46|LETM1_DANRE	LETM1 and EF-hand domain-containing protein 1, mitochondrial OS=Danio rerio GN=letm1 PE=2 SV=2	82.19	8e-07	H3J3L8	H3J3L8_STRPU Uncharacterized protein OS=Strongylocentrotus purpuratus GN=SPU_021109gn PE=4 SV=1	-	-	-	-	-	-	-	-	-	-
264	CL595.Contig1_All	180 1886 LEN=1886; translated	80906	VTSAAQPAKTEEEFQASRRTPSLSASNEDPSEEESVIVEDMAEPQTLEDKKQILIKALKKKYKVQYNGVKPIPYIQERLYCVDNVFVESGVNASIGGAASYDKDIQWERLESYKNIFTDPRMRSNRRIIEGEPGYGKSTLTLQLAYDWCNGVPDSPLYDVEILILLKLRQMGNVTSIYKAIKLYLIPDERRIKIRDIREIIESCRSVAFQLDGYDEYPEKDKENDVGRIMMLQMFPESDVTLTTRYLPKEYDKSNTNRFKLTGFDDAARDEYIRKAVCGNNEQAVAKVKKGLKENVILDDLCQVPLFFSMFSHMTHEREDFQKFKSVTDFFRYMMRCFHHHTRNKAEEYNVERYATMFEANHEELSKVAFEGLSKENQQIVWEKVSLIKRLGEGFYNHH…	117	7.2	-	10	5	4	3	1.17	1.113	2.432	4	4	4	-	-	*	CL595.Contig1_All	30.25	3e-06	gi|390338425|ref|XP_003724776.1|	PREDICTED: uncharacterized protein LOC100892100 [Strongylocentrotus purpuratus]	-	-	-	-	32.84	8e-08	H3HPM0	H3HPM0_STRPU Uncharacterized protein OS=Strongylocentrotus purpuratus GN=SPU_003619gn PE=4 SV=1	-	-	-	-	-	-	-	K15015|1|6e-15|82.8|spu:584114|solute carrier family 32 (vesicular inhibitory amino acid transporter)	-	-
265	CL2536.Contig1_All	39 3035 minus strand catalytic, putative [Ricinus communis] >gi|223544376|gb|EEF45897.1| catalytic, putative [Ricinus communis]	127131	IFLLQIFNNLTPSGALYEDQVGKFDWRQQYIGHVKEAVLEYGGARKHIFVSSDSNVLAAILARNGNIAWRHIFQQGEAGIINALLYTGQELLTVSNNGFVVRSWDPNSGSLQWEAITSSVLSSESGENVPGVMLFQEEGNPKKPRLAVTYNGNVIVLNVKSGEELWKESLPNSDSIQDYLIQVNLNDEDDGALVVLGRVPGMGFKVFRYNAKDGTLLGQTQVPSPWLQEDTSCMVLSGDKVVCADSQSKAVRIATIQSRQQDQTGFSSIPLTTLQLPATGFHVEPINKYSVGDHRYFALGLDDRTLAWLKLEGEDVRVVKTFPQVSSFTFDYYKDQQILTIVSGQNEEMLIQSHTKDKEITNLRSKAKIGASSGSPKKVYAMYLDRKDKTVGSRTLLQT…	81	4	-	5	5	4	4	0.781	1.11	1.531	3	3	3	-	-	*	CL2536.Contig1_All	56.34	3e-11	gi|405958023|gb|EKC24192.1|	hypothetical protein CGI_10013811 [Crassostrea gigas]	39.75	0	sp|Q8N766|EMC1_HUMAN	ER membrane protein complex subunit 1 OS=Homo sapiens GN=EMC1 PE=1 SV=1	69.65	9e-71	H3HIM4	H3HIM4_STRPU Uncharacterized protein OS=Strongylocentrotus purpuratus GN=SPU_001478gn PE=4 SV=1	-	-	-	-	-	-	-	-	-	-	GO:0072546//ER membrane protein complex
266	Unigene12188_All	214 501 TPA: hypothetical protein ZEAMMB73_174918 [Zea mays]	13287	YQDGEEYRGDWVEGKKQGLGELTMTDGTKYTGGFENGLFSGVGVLAFPDGSKFEGQFSGGKFEGYGIFKGAHGMTFEGEFKQGKVSGKGLITFPDG	18	9.4	-	1	1	1	1	---	---	---	-	-	-	-	-	-	Unigene12188_All	64.21	5e-27	gi|432842960|ref|XP_004065523.1|	PREDICTED: MORN repeat-containing protein 4-like [Oryzias latipes]	61.46	5e-27	sp|Q5BJS9|MORN4_RAT	MORN repeat-containing protein 4 OS=Rattus norvegicus GN=Morn4 PE=2 SV=1	64.21	2e-26	H2L2V0	H2L2V0_ORYLA Uncharacterized protein OS=Oryzias latipes GN=MORN4 PE=4 SV=1	slr1485	68.9	2e-12	COG4642	Uncharacterized protein conserved in bacteria	S	Function unknown ;	K04575|1|1e-12|72.0|ame:413195|amyotrophic lateral sclerosis 2 (juvenile)	-	-
267	Unigene95_All	138 569 minus strand PREDICTED: ubiquitin-conjugating enzyme E2-17 kDa-like [Cucumis sativus] >gi|449496885|ref|XP_004160253.1| PREDICTED: ubiquitin-conjugating enzyme E2-17 kDa-like [Cucumis sativus]	22491	ATRRLAKELTDINKNPTSLYRINSDDTNILLWKGLIIPQQEPYNKGAFKIEINFPAEYPFKPPKITFKTKIYHPNIDEKGQVCLPIISPENWKPATKADQVIQALLALVHSPEPEHPLRGDLAEEYAKDKKKFFRNAEDYTKKF	932	55.6	-	43	43	6	6	1.03	0.969	1.025	41	41	41	-	-	-	Unigene95_All	82.52	1e-35	gi|297274209|ref|XP_002800753.1|	PREDICTED: ubiquitin-conjugating enzyme E2 L3-like isoform 2 [Macaca mulatta]	71.72	3e-46	sp|P68037|UB2L3_MOUSE	Ubiquitin-conjugating enzyme E2 L3 OS=Mus musculus GN=Ube2l3 PE=2 SV=1	82.52	2e-34	G1QH50	G1QH50_NOMLE Uncharacterized protein OS=Nomascus leucogenys PE=3 SV=1	YDR059c	117	6e-27	COG5078	Ubiquitin-protein ligase	O	Posttranslational modification, protein turnover, chaperones ;	K04552|1|2e-50|197|nve:NEMVE_v1g235862|ubiquitin-conjugating enzyme E2 L3 [EC:6.3.2.19]	-	GO:0016881//acid-amino acid ligase activity;GO:0000166//nucleotide binding	-
268	Unigene15050_All	175 822 minus strand predicted protein [Hordeum vulgare subsp. vulgare]	29124	GMVKAIQGSHKIVYHPDGPEGEAVEVDFTPPFRRISMIEELEKVLKVKFPPPDQLHTADANKFLDELCVKNEVECPPPRTTARLLDKLVGDFIESQCINPTYIINHPEIMSPLSKWHRTTKGLTERFECFVMKKEIVNAYTELNDPLVQRERFEMQTADRAAGDDEAQLVDENFCTALEYGLPPTGGWGMGIDRLTMFLTDNNNIKEVLFFPAMRP	213	26.9	-	20	8	5	1	1.17	1	0.997	5	5	5	-	-	-	Unigene15050_All	81.48	6e-20	gi|428671948|gb|EKX72863.1|	lysyl-tRNA synthetase, putative [Babesia equi]	73.61	6e-96	sp|P37879|SYK_CRIGR	Lysine--tRNA ligase OS=Cricetulus griseus GN=KARS PE=1 SV=1	78.24	5e-102	E9ISA6	E9ISA6_SOLIN Lysyl-tRNA synthetase (Fragment) OS=Solenopsis invicta GN=SINV_10183 PE=3 SV=1	SPBC17G9.03c	319	2e-87	COG1190	Lysyl-tRNA synthetase (class II)	J	Translation, ribosomal structure and biogenesis ;	K04567|1|1e-101|369|aag:AaeL_AAEL014702|lysyl-tRNA synthetase, class II [EC:6.1.1.6]	GO:0006430//lysyl-tRNA aminoacylation	GO:0003676//nucleic acid binding;GO:0004824//lysine-tRNA ligase activity;GO:0005524//ATP binding;GO:0000287//magnesium ion binding	GO:0005737//cytoplasm
269	CL9732.Contig2_All	2 1396 predicted protein [Hordeum vulgare subsp. vulgare]	69586	NVILDSEILMVDTNGKILPFGTLGIHKKSAFQDANACLFVFDCIHFNGENLMDKPLKERRKVLEQNMTPIPNRIMFSEMEFIKEADDLSAMIRNVIKEGLEGLVLKDVNGVYEPGKRHWLKVKKDYLSQGAMADSADLLVLGAHYGTGNKGGMMSVFLMGVHDPVTDKFYTVTKCGNGLDDETLAKVNKELQVVKISKNMGKVPSWLKINKSQVPDFVVQDPRKAPVWEIIGAEFSKSDIHTADGISIRFPRVTKIRDDKDFTTATNLPRLKVLFKKSKEETDVGALLPGSSNSNNSNKRPKTGNTKTEASPTKKQKTSNTKTEASPAKKQTSANISSPKKEPKEINSGPSLSPSPANQEKPLCKYGASCYQKNPEHRRKYSHDATNGGKSLGLPNVFT…	69	5.2	-	3	3	2	2	0.787	1.082	1.005	3	3	3	-	-	-	CL9732.Contig2_All	70.07	4e-117	gi|291405585|ref|XP_002719279.1|	PREDICTED: DNA ligase (ATP) 3 isoform 3 [Oryctolagus cuniculus]	55.35	3e-87	sp|P16272|DNLI_VACCW	DNA ligase OS=Vaccinia virus (strain Western Reserve) GN=LIG PE=1 SV=1	69.37	7e-115	H2QCN9	H2QCN9_PANTR DNA ligase OS=Pan troglodytes GN=ENSG00000005156 PE=3 SV=1	ECU02g1220	166	7e-41	COG1793	ATP-dependent DNA ligase	L	Replication, recombination and repair ;	K10776|1|9e-146|517|bfo:BRAFLDRAFT_119901|DNA ligase 3 [EC:6.5.1.1]	GO:0006266//DNA ligation;GO:0006260//DNA replication;GO:0006303//double-strand break repair via nonhomologous end joining;GO:0045910//negative regulation of DNA recombination;GO:0043504//mitochondrial DNA repair	GO:0003909//DNA ligase activity;GO:0097159//organic cyclic compound binding;GO:0005515//protein binding;GO:1901363//heterocyclic compound binding	GO:0000795//synaptonemal complex
270	Unigene19625_All	20 601 plant synaptotagmin [Selaginella moellendorffii] >gi|300167772|gb|EFJ34376.1| plant synaptotagmin [Selaginella moellendorffii]	29169	RTKTVHKTLNPEFNETLTYYGITDEDLQKKTLRLSVLDEDRFGHNDFIGEHRLPLRRLTPHQTKSLSVYLDKQLPLEKDDELLSGGRGRILIYLKYISSRQQLQVGIIRCAGLASMDVNGYSDPYVKLYLKPDTGKKTKQKTALKRKTLNPEFNEDFYYDVKHNELAKKTLEITVWDKDIGKNDYIGGVQLGIN	16	3.1	-	1	1	1	1	---	---	---	1	1	1	-	-	-	Unigene19625_All	75.37	3e-75	gi|390353950|ref|XP_790269.2|	PREDICTED: uncharacterized protein LOC585346 [Strongylocentrotus purpuratus]	67.69	9e-67	sp|P70610|DOC2B_RAT	Double C2-like domain-containing protein beta OS=Rattus norvegicus GN=Doc2b PE=1 SV=2	78.87	8e-77	H3I7Y0	H3I7Y0_STRPU Uncharacterized protein OS=Strongylocentrotus purpuratus GN=SPU_010151gn PE=4 SV=1	YML072c	50.4	2e-06	COG5038	Ca2+-dependent lipid-binding protein, contains C2 domain	R	General function prediction only ;	K15290|1|4e-25|114|bfo:BRAFLDRAFT_214382|synaptotagmin-1	-	-
271	Unigene4651_All	249 1145 unknown [Medicago truncatula]	43321	MILLEIKNRIIEETLLQRFENAANGIKADAIDTKIGDFDGVLFHLSNPDGDKTKILLSASLKFYTELQEYGADELLKREYGDHLVDAESGYNVSLLFDLTNVPANPAEMAAKAALLKRNCFASVFEKYFNYLKDEDTSGKKRAVIHYRDDETMYVHAKKDRVTVVFSTLFKDDDDVIIGKVFMQEFKEGRKASRNAPQVLFSHREPPLELEGTDASVGENIGYITFVLEPRHINDELKDNTINLIHTFRDYLHYHIKCSKAYIHSRMRARTTDFLKILNRARPEDQTKEKKTIKGKTFQ	646	37.8	-	53	53	12	12	0.958	0.976	1.158	46	46	46	-	-	*	Unigene4651_All	85.33	1e-30	gi|343962345|dbj|BAK62760.1|	actin-related protein 2/3 complex subunit 2 [Pan troglodytes]	72.91	2e-126	sp|Q5R5Z5|ARPC2_PONAB	Actin-related protein 2/3 complex subunit 2 OS=Pongo abelii GN=ARPC2 PE=2 SV=1	79.44	6e-45	H7C3F9	H7C3F9_HUMAN Actin-related protein 2/3 complex subunit 2 (Fragment) OS=Homo sapiens GN=ARPC2 PE=4 SV=1	-	-	-	-	-	-	-	K05758|1|8e-127|453|bta:540838|actin related protein 2/3 complex, subunit 2	GO:0006928//cellular component movement;GO:0030838//positive regulation of actin filament polymerization	GO:0003779//actin binding;GO:0005200//structural constituent of cytoskeleton	GO:0005885//Arp2/3 protein complex;GO:0031252//cell leading edge;GO:0042995//cell projection;GO:0005925//focal adhesion;GO:0005794//Golgi apparatus
272	CL9817.Contig2_All	201 854 hypothetical protein SELMODRAFT_123333 [Selaginella moellendorffii] >gi|300146143|gb|EFJ12814.1| hypothetical protein SELMODRAFT_123333 [Selaginella moellendorffii]	31547	KTSTPLEQYVLLAKGTKGAAAVGLIKQVLEAPGVYVFGELLEMPNIQELSDGASSQYLDALNLFAFGTYHDYKENKSRLPELSEVALKKLKQLTVVALAAKTKRIPYTVLQEHLDMANLRELEDLIIECIYAGILQGKLDQNNQQLEVEYAIGRDIRPEAVSDIINVLQEWCDGCETVLANIEEQITKANKYKEIKVKTKQKIQDEVENIKKAIKATS	79	16.1	-	4	4	3	3	0.86	1.417	1.248	3	4	4	-	*	-	CL9817.Contig2_All	73.81	3e-10	gi|119609155|gb|EAW88749.1|	COP9 constitutive photomorphogenic homolog subunit 7A (Arabidopsis), isoform CRA_c [Homo sapiens]	60.37	3e-73	sp|Q9H9Q2|CSN7B_HUMAN	COP9 signalosome complex subunit 7b OS=Homo sapiens GN=COPS7B PE=1 SV=1	65.58	3e-78	C3XYA1	C3XYA1_BRAFL Putative uncharacterized protein OS=Branchiostoma floridae GN=BRAFLDRAFT_91568 PE=4 SV=1	-	-	-	-	-	-	-	K12180|1|1e-79|295|bfo:BRAFLDRAFT_91568|COP9 signalosome complex subunit 7	GO:0010388//cullin deneddylation	-	GO:0005737//cytoplasm;GO:0008180//signalosome
273	CL8883.Contig2_All	1 2500 LEN=2500; minus strand; translated	105657	LYMFQYKPMTFGCEKHRILLDSVTFIEATLLEXDIHFLVVPLAQDLRSICCATTSRTDELVDPPRSSREXMPGHTGAYGREYHQEAPYTNNNYQHGAPHAPMGYPAKDYGQVNGHDRLASSFNGGSAGNPQGYYGGSPHRPSNGISHPPDGYGRGNQNHRNSSYVPTNGANGPQFDAGLGPSRKQRPKSQGHQNGSNGKISGQGDINTDYFSHSSQTTRSQSSAGKSAGSADRQYHVMHLTTLIMDRKEGIINMDDAMRKLRLMDAKGKIWAQEATMQIFEKDIRLVDNYTQDTIETLPLADLTMVHAEPNKTQYKNLILLVFQFSNKKPPEIFFFSCENTPGQEVVQQVKRAVDSAAGKKKKKKSPPSSGRSSENGIVVPPPPQEPAPLPPDSHVKEK…	34	1	-	1	1	1	1	---	---	---	1	1	1	-	-	-	CL8883.Contig2_All	67.17	2e-72	gi|390356339|ref|XP_785396.3|	PREDICTED: epidermal growth factor receptor kinase substrate 8-like [Strongylocentrotus purpuratus]	50	3e-08	sp|Q8R5F8|ES8L1_MOUSE	Epidermal growth factor receptor kinase substrate 8-like protein 1 OS=Mus musculus GN=Eps8l1 PE=1 SV=1	58.29	2e-59	C3ZXZ4	C3ZXZ4_BRAFL Putative uncharacterized protein (Fragment) OS=Branchiostoma floridae GN=BRAFLDRAFT_173928 PE=4 SV=1	-	-	-	-	-	-	-	K07365|1|2e-06|55.1|xla:399308|NCK adaptor protein	GO:0008344//adult locomotory behavior;GO:0051017//actin filament bundle assembly;GO:0031532//actin cytoskeleton reorganization;GO:0048149//behavioral response to ethanol	GO:0005515//protein binding	GO:0017146//N-methyl-D-aspartate selective glutamate receptor complex;GO:0014069//postsynaptic density
274	Unigene1285_All	1 602 LEN=602; translated	28021	TGLMIVSQSYTDFLLVLVFQLAHYLSSYLQHCSYGSCKMKGAVFLILLTSLALGENAGIKTRITQNALDFFTDAKQILPMLPEMPEFADSTEIAVLGKIDYKVYDIKITSLKHSPKTFLTVKPGVGLYWHGGEIRVAVEAKWIYDTHSIIPISDSGKVEVKITVKSTPFDLKVAADESGHLKIDIADKHCHYHVEESDIEX	51	6.5	-	1	1	1	1	---	---	---	1	1	1	-	-	-	Unigene1285_All	30.28	3e-08	gi|291222552|ref|XP_002731280.1|	PREDICTED: bactericidal permeability increasing protein-like, partial [Saccoglossus kowalevskii]	-	-	-	-	-	-	-	-	-	-	-	-	-	-	-	-	-	-
275	CL1268.Contig2_All	370 3597 RNA polymerase II transcription elongation factor SPT5 [Physcomitrella patens subsp. patens] >gi|162676752|gb|EDQ63231.1| RNA polymerase II transcription elongation factor SPT5 [Physcomitrella patens subsp. patens]	139286	DDDMMGSEAEEVPEGEEGEIIEGAEEEEEEGEDLDEIDDEEDEEEDEEEDEDDFVVNEGSGPPRKKRKRKTGGIMDFILQEADVDEDGGEDEEEDGWEEGAKDLIDREPAVVDDNELHGAHRLQQIWSQENEKEIEEYYRRKYAETSSSSGYAAEEELPNAITQQGLLPGVKDPNLWMVKCRVGEEKVTAMLLMRKFLAYQYQDEPLQIKAVVAPEGIKGMIYVEAYKQTHVKQAITGVSNLRYGQWKQQMVPIKEMTDVLRVVKETAILKPKSWVRLKRGIYKGDLAQVDYFEPSQNQVTLKIIPRIDYTKPRGVIRKALTDQEKKRKRKPGVKLFDQQAIRAVGGEVTTDGDYLVFEGNRFSRKGYMYKTLALSAIIYDGVKPTLAELEKFDDKPEK…	39	1.5	-	1	1	1	1	---	---	---	1	1	1	-	-	-	CL1268.Contig2_All	76.53	3e-37	gi|270346534|pdb|3H7H|B	Chain B, Crystal Structure Of The Human Transcription Elongation Factor Dsif, Hspt4HSPT5 (176-273)	58.21	0	sp|Q5R405|SPT5H_PONAB	Transcription elongation factor SPT5 OS=Pongo abelii GN=SUPT5H PE=2 SV=1	63.19	0	H9HBF4	H9HBF4_ATTCE Uncharacterized protein OS=Atta cephalotes PE=4 SV=1	YML010w	251	4e-66	COG5164	Transcription elongation factor	K	Transcription ;	K15172|1|0.0|1119|bfo:BRAFLDRAFT_282155|transcription elongation factor SPT5	GO:0000122//negative regulation of transcription from RNA polymerase II promoter;GO:0032785//negative regulation of DNA-dependent transcription, elongation;GO:0016239//positive regulation of macroautophagy;GO:0032786//positive regulation of DNA-dependent transcription, elongation;GO:0045944//positive regulation of transcription from RNA polymerase II promoter;GO:0006368//transcription elongation …	GO:0046982//protein heterodimerization activity;GO:0003682//chromatin binding;GO:0019899//enzyme binding	GO:0032044//DSIF complex
276	Unigene29684_All	148 1437 unknown [Lotus japonicus]	59090	KPKYKVADISLADFGRKEIELAEFEMPGLMAMRKKYGPTQPLKGARISGCLHMTIQTAVLIETLQELGAEVQWSSCNIFSTQDHAAAAMAKKGVPVYAWKGETDEEYLWCIEQTVMFPDGKPLNMILDDGGDLTNLIHTKHPQLLDGIYGVSEETTTGVHNLYKMLKTGDLKMPAINVNDSVTKSKFDNLYGCRESLVDGIKRATDIMLAGKVCVVAGYGDVGKGSAQSLRGFGARVIITEIDPINALQAAMEGYEVTTMDEACKKGQVFVSATGCDDIICPRHFEQMPDNAIVCNIGHFDTEIDMKWLNANNVEKINIKAQVDRFKLANGRHIIVLAEGRLVNLGCATGHPSFVMSNSFTNQVLAQIELWTKKDEYKVGVYMLPKKLDEEVALAHLDH…	3358	50.9	-	175	175	18	18	0.801	0.885	1.236	133	133	133	*	*	-	Unigene29684_All	81.4	0	gi|260798488|ref|XP_002594232.1|	hypothetical protein BRAFLDRAFT_113595 [Branchiostoma floridae] >gi|229279465|gb|EEN50243.1| hypothetical protein BRAFLDRAFT_113595 [Branchiostoma floridae]	79.77	0	sp|Q3MHL4|SAHH_BOVIN	Adenosylhomocysteinase OS=Bos taurus GN=AHCY PE=2 SV=3	81.4	0	C3ZBK6	C3ZBK6_BRAFL Adenosylhomocysteinase OS=Branchiostoma floridae GN=BRAFLDRAFT_113595 PE=3 SV=1	SPBC8D2.18c	668	0	COG0499	S-adenosylhomocysteine hydrolase	H	Coenzyme transport and metabolism ;	K01251|1|0.0|741|spu:574714|adenosylhomocysteinase [EC:3.3.1.1]	GO:0033353//S-adenosylmethionine cycle;GO:0006730//one-carbon metabolic process	GO:0004013//adenosylhomocysteinase activity	GO:0005737//cytoplasm
277	CL4009.Contig2_All	269 1027 minus strand Sept1, septin GTPase [Ectocarpus siliculosus] >CL4009.Contig3_All 269 1027 minus strand Sept1, septin GTPase [Ectocarpus siliculosus]	35313	EFTLMVVGESGLGKSTLINSLFLTDLYPERHIPNAAEKLDKTVSIDASTVEIEERGVKLRLTVVDTPGYGDAINNNDCFDPILKYIDDQYERYLNDESGLNRRNIVDNRVHCCFYFISPTGHGLKPLDIEFMKALHNKVNIVPVIAKSDTLTKKEIVNLKRRIMDEIDENSIKIYHMPDSDSDEDEDFKEQNQKLKDSVPFAVCGSSQLIEVKGRKVRGRLYPWGVVEVENPDHCDFIKLRSMLITHMQDLQE	475	29.2	-	23	23	5	5	0.75	0.899	0.877	19	19	19	*	-	*	CL4009.Contig2_All	89.33	3e-128	gi|115762761|ref|XP_788114.2|	PREDICTED: septin-2B-like [Strongylocentrotus purpuratus]	81.03	6e-116	sp|P42208|SEPT2_MOUSE	Septin-2 OS=Mus musculus GN=Sept2 PE=1 SV=2	83.79	2e-117	C3YB10	C3YB10_BRAFL Putative uncharacterized protein OS=Branchiostoma floridae GN=BRAFLDRAFT_226235 PE=3 SV=1	SPAC4F10.11	229	4e-60	COG5019	Septin family protein	DZ	Cell cycle control, cell division, chromosome partitioning ; Cytoskeleton ;	K04557|1|1e-96|352|tgu:100220874|peanut-like protein 1 (cell division control related protein 1)	GO:0051301//cell division;GO:0006184//GTP catabolic process;GO:0031175//neuron projection development;GO:0007067//mitosis;GO:0032880//regulation of protein localization;GO:0007224//smoothened signaling pathway;GO:0002036//regulation of L-glutamate transport;GO:0050790//regulation of catalytic activity;GO:0042384//cilium assembly	GO:0005525//GTP binding;GO:0003924//GTPase activity;GO:0030234//enzyme regulator activity;GO:0032947//protein complex scaffold	GO:0015629//actin cytoskeleton;GO:0060170//cilium membrane;GO:0005730//nucleolus;GO:0009986//cell surface;GO:0005819//spindle;GO:0000145//exocyst;GO:0032154//cleavage furrow;GO:0030496//midbody;GO:0048471//perinuclear region of cytoplasm;GO:0031105//septin complex;GO:0045202//synapse
278	CL6609.Contig1_All	126 2876 predicted protein [Physcomitrella patens subsp. patens] >gi|162669380|gb|EDQ55968.1| predicted protein [Physcomitrella patens subsp. patens]	117533	EYFNLTDLQDPRYDRLPFSIRVLLESAVRNCDNFYVKENDVEKILNWSENQNNAVEVPFKPSRVILQDFTGVPAVVDFAAMRDAVKRLGGDPEKINPACPSDLVIDHSVQVDVTRSLCSRLKNAPNPGGGRFKVMDGCQTYLEMCYRLPIHDTTCPFHHLASDCSSALEKNQEIEFERNKERFLFLKWGAKALKNMLIVPPGSGIVHQVNLEYLARVVFSSEGVLYPDSLVGTDSHTTMINGLGVVGWGVGGIEAEAVMLGQPISMVLPKVVGYKLHGQMNPLATSTDVVLTITKHLRQIGVVGKFVEFFGPGVAQLSIADRATIANMCPEYGATVGFFPVDGNSLQYLRQTGRDEVKINIVESYLKANNLFRDFTNPDQDPEFSEIYELDLASVKSCV…	323	18.5	1	29	29	14	14	0.865	1.031	1.048	22	21	21	-	-	-	CL6609.Contig1_All	76.11	0	gi|390350007|ref|XP_791082.2|	PREDICTED: cytoplasmic aconitate hydratase isoform 2 [Strongylocentrotus purpuratus]	69.4	0	sp|P28271|ACOC_MOUSE	Cytoplasmic aconitate hydratase OS=Mus musculus GN=Aco1 PE=1 SV=3	76.67	0	H3IJQ0	H3IJQ0_STRPU Uncharacterized protein OS=Strongylocentrotus purpuratus GN=SPU_014343gn PE=4 SV=1	BS_citB	966	0	COG1048	Aconitase A	C	Energy production and conversion ;	K01681|1|0.0|1378|bfo:BRAFLDRAFT_121463|aconitate hydratase 1 [EC:4.2.1.3]	GO:0006417//regulation of translation;GO:0010040//response to iron(II) ion;GO:0006879//cellular iron ion homeostasis;GO:0006099//tricarboxylic acid cycle;GO:0009791//post-embryonic development;GO:0050892//intestinal absorption;GO:0006101//citrate metabolic process	GO:0052632//citrate hydro-lyase (cis-aconitate-forming) activity;GO:0030350//iron-responsive element binding;GO:0046872//metal ion binding;GO:0052633//isocitrate hydro-lyase (cis-aconitate-forming) activity;GO:0051539//4 iron, 4 sulfur cluster binding;GO:0048027//mRNA 5'-UTR binding	GO:0005829//cytosol;GO:0005739//mitochondrion;GO:0005794//Golgi apparatus;GO:0005783//endoplasmic reticulum
279	Unigene8140_All	1446 2279 minus strand conserved hypothetical protein [Phytophthora infestans T30-4] >gi|262104720|gb|EEY62772.1| conserved hypothetical protein [Phytophthora infestans T30-4]	37774	SSFFLCRSLLSQLGLLNWNKRSQVDILKKNDQLARELKNLDSRQCRETHKIAVMYVAEGQEDKMSVLSNSAGSKAYENFVSGIGWEIDLATHTGFMGGLQKNHSTGETTPYWATSSVEVIFHVSTRMPSGSEDHNNKKMRHLGNDEVHIVWSEHNRDYRRGIIATEFGDVIIVIYPLKNKLFRIQIQMKPGVPFFGPLFDGAIVDHIVLPGLVRATAINASRGKRLQIPYYQRFYEERARYVETIIKNHKKPSSFEQFAANVFEPSVANKPLARTKPG	20	3.6	-	1	1	1	1	---	---	---	-	-	-	-	-	-	Unigene8140_All	77.1	6e-119	gi|390356553|ref|XP_780053.3|	PREDICTED: ral GTPase-activating protein subunit alpha-1 [Strongylocentrotus purpuratus]	70.68	1e-108	sp|Q6GYQ0|RGPA1_HUMAN	Ral GTPase-activating protein subunit alpha-1 OS=Homo sapiens GN=RALGAPA1 PE=1 SV=1	83.52	5e-82	H3I2T5	H3I2T5_STRPU Uncharacterized protein OS=Strongylocentrotus purpuratus GN=SPU_008313gn PE=4 SV=1	-	-	-	-	-	-	-	K07207|1|3e-24|112|aml:100465690|tuberous sclerosis 2	-	-
280	CL3017.Contig1_All	64 567 hypothetical protein POPTRDRAFT_794121 [Populus trichocarpa] >gi|222869571|gb|EEF06702.1| hypothetical protein POPTRDRAFT_794121 [Populus trichocarpa]	34256	KATKSKPTGPTTLDLVVKAVTALNDTKGSSGVAIKKHIKASGVERSSVFVNKAIKRGVATGVLKQVTGTGASGTFKLDTAKAKKAEQEKAKKQKAVQRKKDLKEKQKKKREEAKAKKDAKKKAVAAKGKKPAAKKAVKKKSAAKPKKAVKPKKPAAKKPTKKVAPKKK	310	24.4	-	18	3	4	2	0.806	0.978	1.415	2	2	2	-	-	-	CL3017.Contig1_All	50.72	9e-09	gi|291238480|ref|XP_002739155.1|	PREDICTED: histone H1 gamma-like protein-like [Saccoglossus kowalevskii]	49.3	6e-10	sp|P06144|H1_LYTPI	Late histone H1 OS=Lytechinus pictus PE=3 SV=1	49.35	4e-07	A3KPR3	A3KPR3_DANRE Novel protein similar to vertebrate histone 1, H1d (HIST1H1D) OS=Danio rerio GN=histh1l PE=3 SV=1	-	-	-	-	-	-	-	K11275|1|6e-10|63.5|spu:373354|histone H1/5	-	-	GO:0043229//intracellular organelle
281	Unigene32699_All	1405 1830 minus strand hypothetical protein GUITHDRAFT_110021 [Guillardia theta CCMP2712]	19780	AVINGKIVISGGYDKTRAYKKVQLYDPETNTWASLKSMTNPRIRFEISVIDDRTYAIGGSDGMNELKSCEVFDMKTGWQPMASMHRERSNFGATVLDGKLYVIGGHRDGICIKSCEVYDPKLDQWTEIAPLQKVRSQLGVCT	41	8.5	-	1	1	1	1	---	---	---	1	1	1	-	-	-	Unigene32699_All	45.77	2e-32	gi|193618018|ref|XP_001948435.1|	PREDICTED: influenza virus NS1A-binding protein-like isoform 1 [Acyrthosiphon pisum] >gi|328721125|ref|XP_003247217.1| PREDICTED: influenza virus NS1A-binding protein-like isoform 2 [Acyrthosiphon pisum]	43.42	9e-12	sp|Q5RG82|NS1BA_DANRE	Influenza virus NS1A-binding protein homolog A OS=Danio rerio GN=ivns1abpa PE=2 SV=1	45.19	5e-27	D6WSW2	D6WSW2_TRICA Putative uncharacterized protein OS=Tribolium castaneum GN=TcasGA2_TC009594 PE=4 SV=1	-	-	-	-	-	-	-	K15046|1|3e-33|140|api:100159317|influenza virus NS1A-binding protein	-	-
282	CL11778.Contig2_All	202 990 conserved unknown protein [Ectocarpus siliculosus]	31245	GTEGYHVLRVQENSPGHKAGLEAFFDFIIAIGNTRLDRDDDTFKRLLREHEERPLKMLVYSSKTLKTREITMTPNNRWGGQGLLGVSIRFCSFEGANENVWHVLDVQPNSPASLAGFRSNTDYIIGAESTLHDSEDLFSLIESHEDRALKLYMYNTETDGCREVTITPSRNWGGEGTLGCGIGYGYLHRIPTRSFPETPVDLSQHMKLAPGSAAPASSSSSSDPQVTLTTTPEGFTEVSLTSTPNTSAATGLETGMAGISLAP	27	2.7	-	1	1	1	1	---	---	---	1	1	1	-	-	-	CL11778.Contig2_All	77.72	2e-90	gi|156407312|ref|XP_001641488.1|	predicted protein [Nematostella vectensis] >gi|156228627|gb|EDO49425.1| predicted protein [Nematostella vectensis]	72.08	1e-88	sp|Q99JX3|GORS2_MOUSE	Golgi reassembly-stacking protein 2 OS=Mus musculus GN=Gorasp2 PE=1 SV=3	77.72	8e-90	A7RGG6	A7RGG6_NEMVE Predicted protein (Fragment) OS=Nematostella vectensis GN=v1g80798 PE=4 SV=1	SPAC1D4.02c	138	7e-33	COG5233	Peripheral Golgi membrane protein	U	Intracellular trafficking, secretion, and vesicular transport ;	-	-	-
283	Unigene14037_All	1 207 LEN=207; minus strand; translated	10195	FDFSVDDGGQEPITMASKDRDLLAAAFTKFLLSNIGGSEMFKDKQTCFFEEVANLHSKKKGSQSIFVER	74	18.8	-	3	3	1	1	2.252	0.976	1.164	3	3	3	*	-	-	Unigene14037_All	61.82	5e-13	gi|443689388|gb|ELT91789.1|	hypothetical protein CAPTEDRAFT_203657, partial [Capitella teleta]	45.76	1e-08	sp|O15033|K0317_HUMAN	Protein KIAA0317 OS=Homo sapiens GN=KIAA0317 PE=2 SV=3	61.4	2e-12	C3ZXF9	C3ZXF9_BRAFL Putative uncharacterized protein OS=Branchiostoma floridae GN=BRAFLDRAFT_281345 PE=4 SV=1	-	-	-	-	-	-	-	-	-	GO:0016874//ligase activity	-
284	Unigene34251_All	4 423 unnamed protein product [Blastocystis hominis] >gi|300175974|emb|CBK22191.2| unnamed protein product [Blastocystis hominis]	17836	RLGLSSLQQFNPDERIIEYMVKTKADGPLVSMSLKSFILNVGARSSAPGGGSVAAAVGALGAGLATMVGWMTYGKRKFENLDPQMRQLIPQLRQAMNDLIPLVDADTSAFDQYMAAAKLPKSTEEEKAIRQQAMQEGMAT	36	5	-	3	3	1	1	0.995	1.154	1.118	2	2	2	-	-	-	Unigene34251_All	65.94	5e-33	gi|348541093|ref|XP_003458021.1|	PREDICTED: formimidoyltransferase-cyclodeaminase-like [Oreochromis niloticus]	58.16	6e-26	sp|Q9YH58|FTCD_CHICK	Formimidoyltransferase-cyclodeaminase OS=Gallus gallus GN=FTCD PE=2 SV=1	63.31	4e-28	G3VL73	G3VL73_SARHA Uncharacterized protein OS=Sarcophilus harrisii GN=FTCD PE=4 SV=1	FN0739	83.2	1e-16	COG3404	Methenyl tetrahydrofolate cyclohydrolase	E	Amino acid transport and metabolism ;	K13990|1|1e-31|134|bfo:BRAFLDRAFT_125780|glutamate formiminotransferase / formiminotetrahydrofolate cyclodeaminase [EC:2.1.2.5 4.3.1.4]	GO:0044237//cellular metabolic process	GO:0003824//catalytic activity	-
285	CL1455.Contig1_All	319 786 hypothetical protein SELMODRAFT_228213 [Selaginella moellendorffii] >gi|300158121|gb|EFJ24744.1| hypothetical protein SELMODRAFT_228213 [Selaginella moellendorffii] >CL1455.Contig3_All 319 786 minus strand hypothetical protein SELMODR	20429	LRIAAAVVLPHIGGLYGATITKDQIKGWYKTLNKPPWTPPNWVFGPMWTSLYTAMGYASYLAWKDGGGFKNAMLPLGSYAVGLGLNWMWTPVFFGRHKLGPSVAIILSCLGMTIGTAYLYYPINETACFLNFPLIAWLTLASSVNIYVWLNNKEKG	200	12.8	-	3	3	1	1	1.342	0.92	0.637	3	3	3	-	-	-	CL1455.Contig1_All	60	5e-26	gi|195098312|ref|XP_001997936.1|	GH10662 [Drosophila grimshawi] >gi|193905914|gb|EDW04781.1| GH10662 [Drosophila grimshawi]	42.67	3e-28	sp|P30535|TSPO_BOVIN	Translocator protein OS=Bos taurus GN=TSPO PE=2 SV=1	60	2e-25	B4K3T2	B4K3T2_DROGR GH10662 OS=Drosophila grimshawi GN=GH10662 PE=4 SV=1	SMa1079	120	9e-28	COG3476	Tryptophan-rich sensory protein (mitochondrial benzodiazepine receptor homolog)	T	Signal transduction mechanisms ;	K05770|1|1e-40|165|spu:583617|benzodiazapine receptor	GO:0060319//primitive erythrocyte differentiation	-	-
286	Unigene33882_All	3 674 minus strand predicted protein [Physcomitrella patens subsp. patens] >gi|162677471|gb|EDQ63941.1| predicted protein [Physcomitrella patens subsp. patens]	32662	KTKFWGKSMEVVPIGTIHIEIPKYGDHYKFSKVTSCVHNILSGERWLDHYGETTITNGKITCKVTFTKASYWSNRRHEVNGYVYDEHGQLVHELFGKWNEGMYCGRSSSAKCIWRTGNMPEDHHLYYGFTRFAIELNEITSSIRNHLPQTDSRFRPDQRLLEEGELIAAEKEKQRVESSQRERRKYRDEHGITYEPVFFRCVKENGKEHWVFKNDYWDARKNHS	30	7.1	-	1	1	1	1	---	---	---	1	1	1	-	-	-	Unigene33882_All	63.18	6e-81	gi|390346792|ref|XP_790780.3|	PREDICTED: oxysterol-binding protein-related protein 6-like [Strongylocentrotus purpuratus]	56.19	1e-76	sp|Q9BZF3|OSBL6_HUMAN	Oxysterol-binding protein-related protein 6 OS=Homo sapiens GN=OSBPL6 PE=1 SV=1	68.89	3e-72	H3HNR7	H3HNR7_STRPU Uncharacterized protein OS=Strongylocentrotus purpuratus GN=SPU_003311gn PE=4 SV=1	-	-	-	-	-	-	-	-	GO:0006810//transport	-	-
287	CL1029.Contig1_All	125 616 3-hydroxyanthranilate 3,4 dioxygenase [Galdieria sulphuraria]	24647	VDKWIEENKKFFLPPVCNKMMHNRGQMKAFFVGGPNQRKDYHIEEGEELFYMLKGDMCLKVVEQGKHKDIPIKEGQIFLLRGSTPHSPQRDADTIGLVLERERDLSEKDGLRYYVEGTTKPLYEEWFHCTDLGTQLGPVIKRFFASEQCKTGKPIPGTILEKPP	213	26.2	-	23	23	4	4	1.794	1.332	0.863	18	18	18	*	*	-	CL1029.Contig1_All	81.1	3e-74	gi|390333521|ref|XP_787214.3|	PREDICTED: 3-hydroxyanthranilate 3,4-dioxygenase-like [Strongylocentrotus purpuratus]	69.23	7e-62	sp|Q6P7I0|3HAO_XENLA	3-hydroxyanthranilate 3,4-dioxygenase OS=Xenopus laevis GN=haao PE=2 SV=1	80.49	5e-74	H3HVX3	H3HVX3_STRPU Uncharacterized protein OS=Strongylocentrotus purpuratus GN=SPU_005851gn PE=4 SV=1	-	-	-	-	-	-	-	K00452|1|3e-72|270|spu:579045|3-hydroxyanthranilate 3,4-dioxygenase [EC:1.13.11.6]	GO:0009435//NAD biosynthetic process;GO:0055114//oxidation-reduction process	GO:0000334//3-hydroxyanthranilate 3,4-dioxygenase activity;GO:0005506//iron ion binding;GO:0005516//calmodulin binding	GO:0005737//cytoplasm
288	Unigene32769_All	186 1319 minus strand beta-ureidopropionase [Chlamydomonas reinhardtii] >gi|158283956|gb|EDP09706.1| beta-ureidopropionase [Chlamydomonas reinhardtii]	48738	ASLESVLEEHIPNDKLKEVKRILFGTRAKDLELPSEVTDIASKHDFEVKAFQMDAGKEQLRPPRTVRIGLIQNKIVLPTSAPVQEQRDALHQRIGQIAEAAYHAKVNILCFQETWTIPFAFCTREKLPWVELAESAEDGPTTVLCQEWAKKYNMVIISPILERDSSRGDILQNTAVVISNTGQVLGKSSKNHIPRVGDFNESTYYFEGSTGHRVFETQFGRIAINICYGRHHPLNWHMYGMNGAEIVFNPSATVGGLSEPMWSIEARNAAIANTYFAAAINRVGTEVFENEFTSGDGKPAHKDFGHFYGSSYVAAPDGSRTPGLSRTRDGLLVTEVNLNLIRQIKDKWCFQMTGRYDMYARELTEATTPGFQPNIIKE	278	15.6	-	10	10	4	4	0.95	1.066	0.853	8	7	8	-	-	-	Unigene32769_All	81.03	3e-69	gi|312377367|gb|EFR24210.1|	hypothetical protein AND_11355 [Anopheles darlingi]	68.44	1e-148	sp|Q03248|BUP1_RAT	Beta-ureidopropionase OS=Rattus norvegicus GN=Upb1 PE=1 SV=1	81.03	1e-68	E3X1I6	E3X1I6_ANODA Putative uncharacterized protein OS=Anopheles darlingi GN=AND_11355 PE=4 SV=1	PA0293	104	2e-22	COG0388	Predicted amidohydrolase	R	General function prediction only ;	K01431|1|1e-157|556|bfo:BRAFLDRAFT_269635|beta-ureidopropionase [EC:3.5.1.6]	GO:0006807//nitrogen compound metabolic process	GO:0016810//hydrolase activity, acting on carbon-nitrogen (but not peptide) bonds	-
289	CL2943.Contig2_All	205 1824 minus strand predicted protein [Physcomitrella patens subsp. patens] >gi|162697323|gb|EDQ83659.1| predicted protein [Physcomitrella patens subsp. patens]	67060	GEKVLRSPNYNKGTAFTLRERQALGIHGLLPPVVSTAPVQEERILRNLAHQSNDLDRYVQLMDLQDRNEKLFYRVLCNHLEEMMPIIYTPTVGLACQRYGFIFRRPRGLFITIHDRGHIEDMLSAWPETNVKAIVVTDGERILGLGDLGCYGMGIPVGKLALYTAIAGVEPTQCLPVVIDVGTNNQTLLDDPLYIGIRENRCNGQEYDDLVEEFMTAAVKRYGQSCLIQFEDFANHNAFRFLEKYRNRYCVFNDDIQGTASVAVAGILASLRITGGKISDNLFLFQGAGEASLGIADLLVEAMKEDGLSVDEARARINLMDRKGLITKNRKSGGVTEHKGRYAHENDDMTDLLEVIKTIQPTALIGAAAVGGVFTQQILETMASFNDSPIIFALSNPTS…	1132	23	-	37	37	8	8	1.238	0.881	1.017	33	33	34	*	-	-	CL2943.Contig2_All	74.07	0	gi|390338810|ref|XP_780686.3|	PREDICTED: NADP-dependent malic enzyme-like [Strongylocentrotus purpuratus]	64.07	0	sp|P40927|MAOX_COLLI	NADP-dependent malic enzyme OS=Columba livia GN=ME1 PE=1 SV=1	74.81	0	H3HWG4	H3HWG4_STRPU Malic enzyme OS=Strongylocentrotus purpuratus GN=SPU_006048gn PE=3 SV=1	sfcA	436	6e-122	COG0281	Malic enzyme	C	Energy production and conversion ;	K00029|1|0.0|862|spu:575178|malate dehydrogenase (oxaloacetate-decarboxylating)(NADP+) [EC:1.1.1.40]	GO:0009725//response to hormone stimulus;GO:0009743//response to carbohydrate stimulus;GO:0005975//carbohydrate metabolic process;GO:0006741//NADP biosynthetic process;GO:0006108//malate metabolic process;GO:0051262//protein tetramerization;GO:0044255//cellular lipid metabolic process	GO:0051287//NAD binding;GO:0043531//ADP binding;GO:0030145//manganese ion binding;GO:0009055//electron carrier activity;GO:0004473//malate dehydrogenase (oxaloacetate-decarboxylating) (NADP+) activity;GO:0050661//NADP binding;GO:0016619//malate dehydrogenase (oxaloacetate-decarboxylating) activity	GO:0005829//cytosol;GO:0005739//mitochondrion
290	Unigene7308_All	12 584 minus strand kinesin-like calmodulin binding protein [Zea mays]	26323	RGWILLSLCVGCFGPTDKFVKYLKAFIRGGPPGYAPYCEERLRRTLNNGTRNQPPSWLELQATKTKNPLMLPVTFMDGTTKTLLADSATTAKELCKTLAEKIGLKDQFGFSLYIALFDKVSSLGSGSDHVMDAISQCEQYAKERGAQERNAPWRLFFRKEIFAPWHDPAVDPVGTNLIYQQVVRGIKFGEY	124	20.4	-	5	5	3	3	1.039	1.01	1.189	5	4	4	-	-	-	Unigene7308_All	88.89	4e-54	gi|262300761|gb|ACY42973.1|	myosin [Limnadia lenticularis]	85.86	2e-92	sp|Q9V3Z6|MYO7A_DROME	Myosin-VIIa OS=Drosophila melanogaster GN=ck PE=1 SV=1	88.89	1e-53	D0UJQ7	D0UJQ7_9CRUS Myosin (Fragment) OS=Limnadia lenticularis PE=2 SV=1	-	-	-	-	-	-	-	K10359|1|1e-93|342|bfo:BRAFLDRAFT_277907|myosin VII	GO:0008407//chaeta morphogenesis;GO:0007605//sensory perception of sound;GO:0035293//chitin-based larval cuticle pattern formation;GO:0008586//imaginal disc-derived wing vein morphogenesis;GO:0030048//actin filament-based movement;GO:0051904//pigment granule transport;GO:0023014//signal transduction by phosphorylation;GO:0007040//lysosome organization;GO:0001845//phagolysosome assembly;GO:0006886…	GO:0030898//actin-dependent ATPase activity;GO:0043531//ADP binding;GO:0000146//microfilament motor activity;GO:0019904//protein domain specific binding;GO:0032027//myosin light chain binding;GO:0000155//phosphorelay sensor kinase activity;GO:0051015//actin filament binding;GO:0032403//protein complex binding;GO:0042803//protein homodimerization activity;GO:0005516//calmodulin binding;GO:0005524/…	GO:0001750//photoreceptor outer segment;GO:0042470//melanosome;GO:0005765//lysosomal membrane;GO:0005829//cytosol;GO:0045179//apical cortex;GO:0032391//photoreceptor connecting cilium;GO:0032420//stereocilium;GO:0001917//photoreceptor inner segment;GO:0031477//myosin VII complex;GO:0045202//synapse;GO:0016324//apical plasma membrane
291	Unigene29358_All	2 904 minus strand hypothetical protein PHYSODRAFT_344860 [Phytophthora sojae]	40516	FYAPWCGHCQRIQPIWSEVGQQMVTNHPEIRVSRLDGTRYGSIMDLYDVKGFPTIMFIEGERSYTHRGGRTSKDIVSFALRAQGPAVRNLEDQAQFRQAQRENDVTFILVAEDDTSDLQKYFTSTAEDKILDSNFFRTTRDVIPEKSRPTELPALLVFKDGTSYRFEEEVTEESVAAWILQELITAFPMFTSDNIFNLFKGGKALVIILTFPSASNAKKHPHYLMREVLKEAALHHRDKYHKKYQFVYMEDKAFMQELILTSLEIPSVLVFDPATYFYYLMDEPEKVSQESLEEFLKSVEE	122	8	-	4	4	2	2	1.141	0.97	1.079	4	4	4	-	-	-	Unigene29358_All	52.98	4e-55	gi|390346684|ref|XP_003726604.1|	PREDICTED: protein disulfide-isomerase TMX3-like [Strongylocentrotus purpuratus]	43.04	3e-13	sp|Q9SRG3|PDI12_ARATH	Protein disulfide isomerase-like 1-2 OS=Arabidopsis thaliana GN=PDIL1-2 PE=1 SV=1	47.62	6e-15	C4QPB5	C4QPB5_SCHMA Protein disulfide-isomerase, putative (Fragment) OS=Schistosoma mansoni GN=Smp_179230 PE=4 SV=2	SPAC1F5.02	62.8	8e-10	COG0526	Thiol-disulfide isomerase and thioredoxins	OC	Posttranslational modification, protein turnover, chaperones ; Energy production and conversion ;	K09585|1|2e-51|202|bfo:BRAFLDRAFT_121010|thioredoxin domain-containing protein 10 [EC:5.3.4.1]	-	-
292	Unigene15284_All	147 1421 minus strand unknown [Picea sitchensis]	58816	VDSPTLDLEAHAVCYSGFAKINRLLFIAARCPALRVEALRMALNYTQTTYNTQAYQHIHSKLAEAVTSSSLLPDAVAGVVHNIPSLDTNWIETTNKKAALKLEKLDTDLKNYKANSIKESIRRGHDDLGDHYLDLGDLSNALKCYSRARDYCTSPKHIINMCLNVIKVSIHLKNWSHVLSYVTKAESSPELTEKDSKDNMVIVTKLKCAAGVAELATKKYKPAAKYFLQASFDHCDFPELLSPNNVAVYGGLCALATYTRQELQKNIISSSSFKLFLELEPQLRDIIFMFYQSKYASCLKLLDEIKDNLLLDMYLATHVATLYSQIRNRALIQYFSPYVSADMHKMAIAFNTTVPALEDELMHLILDGQINARIDSHNKILYARDVDQRCSTFEKSLAM…	72	8.5	-	2	2	2	2	0.521	0.805	1.893	2	2	2	-	-	-	Unigene15284_All	84.52	5e-68	gi|471367741|ref|XP_004374400.1|	PREDICTED: COP9 signalosome complex subunit 1, partial [Trichechus manatus latirostris]	75.29	3e-166	sp|Q6NRT5|CSN1_XENLA	COP9 signalosome complex subunit 1 OS=Xenopus laevis GN=csn1 PE=2 SV=1	83.96	0	H3J2Y1	H3J2Y1_STRPU Uncharacterized protein OS=Strongylocentrotus purpuratus GN=SPU_020870gn PE=4 SV=1	YPR108w	72	2e-12	COG5187	26S proteasome regulatory complex component, contains PCI domain	O	Posttranslational modification, protein turnover, chaperones ;	K12175|1|0.0|678|spu:582815|COP9 signalosome complex subunit 1	GO:0010388//cullin deneddylation	GO:0005515//protein binding	GO:0008180//signalosome
293	Unigene5520_All	458 943 minus strand protocadherin-like protein [Phytophthora infestans T30-4] >gi|262098392|gb|EEY56444.1| protocadherin-like protein [Phytophthora infestans T30-4]	20133	GTYGIIVEPLEAPVPVFCDMTTDQGGWIVIQRRVDGSVDFNRTYAEYADGFGTLSGEFWLGNDLISALTKDTTMEMRIDMTDFDDVTVFAKYGKFLVDGANKYYRLNVGGEFQGDAGNSLSYHQRSPFSTFDSDNDASPSRNCALRHTGGWWFKNCMRSNLN	50	4.9	-	3	3	1	1	1.405	0.446	0.981	3	3	3	-	*	-	Unigene5520_All	55.63	7e-36	gi|194226005|ref|XP_001498907.2|	PREDICTED: ficolin-1-like [Equus caballus]	53.95	4e-18	sp|E2IYB3|FCNV1_VARKO	Veficolin-1 (Fragment) OS=Varanus komodoensis PE=2 SV=1	56.29	3e-36	F6QQT6	F6QQT6_HORSE Uncharacterized protein (Fragment) OS=Equus caballus GN=LOC100146602 PE=4 SV=1	-	-	-	-	-	-	-	K10104|1|3e-42|170|cfa:608247|ficolin	GO:0008228//opsonization	GO:0003823//antigen binding;GO:0005509//calcium ion binding;GO:0048306//calcium-dependent protein binding	-
294	CL7129.Contig2_All	91 987 conserved unknown protein [Ectocarpus siliculosus]	39232	MYSVVFKQEEAHEDGIWTVAWAKSDKDGMENIVTGSLDDMVKCWHWENDELKLRWTLEGHQLGVISVDINPTGTVAASSSLDSHIRLWDLEVGQQMRSIDAGPVDAWTLTFSPDGKFLASGSHSGKINLFKVDDGKKESSMDTRGKFTLSIAYSPDTKFIASGAIDGIVNIFDLQTGKLLHTLEGHAMPIRSLCFSPDSQLLATASDDGHIKVYDVQHANLAGTLSGHGSWVHSVHFCPDNTHFVSSSADKTVKVWNAGTRQCVATFYDHLEQVWQAKYNANGSKIVSVSDDKAIHIYD	115	19.7	-	3	3	3	3	1.081	0.915	1.04	3	3	3	-	-	-	CL7129.Contig2_All	83.95	6e-151	gi|390332820|ref|XP_791722.3|	PREDICTED: WD repeat-containing protein 61-like [Strongylocentrotus purpuratus]	73.83	2e-127	sp|Q5ZJH5|WDR61_CHICK	WD repeat-containing protein 61 OS=Gallus gallus GN=WDR61 PE=2 SV=1	83.95	2e-150	H3HZA3	H3HZA3_STRPU Uncharacterized protein OS=Strongylocentrotus purpuratus GN=SPU_007058gn PE=4 SV=1	all0438_2	145	6e-35	COG2319	FOG: WD40 repeat	R	General function prediction only ;	K12602|1|4e-151|534|spu:591782|WD repeat-containing protein 61	GO:0045638//negative regulation of myeloid cell differentiation;GO:2001162//positive regulation of histone H3-K79 methylation;GO:0032968//positive regulation of transcription elongation from RNA polymerase II promoter;GO:0051571//positive regulation of histone H3-K4 methylation;GO:0045944//positive regulation of transcription from RNA polymerase II promoter;GO:0080182//histone H3-K4 trimethylation	-	GO:0016593//Cdc73/Paf1 complex;GO:0055087//Ski complex;GO:0035327//transcriptionally active chromatin
295	CL9149.Contig2_All	1 292 LEN=292; minus strand; translated	11605	XDATSAGSATRNIAKVVAETAELSDDVASAGASVGTNTAVKVSRGIPVVGVVFASVGIVTESYSLISHAMDLSKCSNGEREDLSKQFYELAVIMALTN	15	15.3	-	1	1	1	1	---	---	---	-	-	-	-	-	-	CL9149.Contig2_All	-	-	-	-	-	-	-	-	-	-	-	-	-	-	-	-	-	-	-	-	-	-
296	CL2533.Contig1_All	248 1210 predicted protein [Populus trichocarpa] >gi|222843419|gb|EEE80966.1| predicted protein [Populus trichocarpa]	40168	FTLTNNTVTVKISTFGATIVSIQVPDKNKKISDVVLGFDSVKGYEAKNPYFGATVGRVSGRIGQGKFTLNGESYQLAINNGPNHLHGGLEGFDKKVFQASVQDDSLQLVYVSPDGEEGYPGEVTLTVTYTLRDDNGLVIDYHATSNQPTPISLTNHSYFNLAGHEAGSINDHLLQILADEYAESDLKTLLNTGRLIPVTDSIFDLRQRLVIGERIHDIPGGGFDVSFKHPNQSLDYVCARVEHPDSGRVLEVMTNQPAVHLYTGNFLDASLTGKQGHSYPKHSALCLEMQNFPNAINLPSFPNCVLKPGEAYRSTTIYKFS	620	15.6	-	20	20	4	4	1.228	0.928	1.746	19	19	19	-	-	*	CL2533.Contig1_All	53.09	3e-88	gi|443732300|gb|ELU17073.1|	hypothetical protein CAPTEDRAFT_221220 [Capitella teleta]	51.09	2e-89	sp|Q9GKX6|GALM_PIG	Aldose 1-epimerase OS=Sus scrofa GN=GALM PE=2 SV=1	51.57	4e-94	C3Z3S8	C3Z3S8_BRAFL Putative uncharacterized protein OS=Branchiostoma floridae GN=BRAFLDRAFT_284587 PE=4 SV=1	TM0282	262	5e-70	COG2017	Galactose mutarotase and related enzymes	G	Carbohydrate transport and metabolism ;	K01785|1|1e-95|349|bfo:BRAFLDRAFT_284587|aldose 1-epimerase [EC:5.1.3.3]	GO:0005975//carbohydrate metabolic process	GO:0016853//isomerase activity;GO:0005488//binding	-
297	Unigene22385_All	166 1143 minus strand hypothetical protein SELMODRAFT_449423 [Selaginella moellendorffii] >gi|302824837|ref|XP_002994058.1| hypothetical protein SELMODRAFT_449420 [Selaginella moellendorffii] >gi|300138112|gb|EFJ04892.1| hypothetical protein SEL	44036	WEVPSRYIDINPIGNGAYGQVCSSENTDLNKRVAIKKLARPFQSVTHAKRTYRELKLLHHMKHENVINLLDVFSPCLSFDTFTDVYFVSDLMGADLNTVNKCQKLSDEHVKFLVYQILRGLKYIHSAGVIHRDLKPSNLAVNEDCELRILDFGLARMTDEEMTGYVATRWYRAPEIMLNWMHYSDKVDMWSVGCIMAELLTGQVLFPGTDNIDQLTKILSITGTPSEAFLTKIESDSARDYVRNMETFARKDFYHFFHGANPVAINILERMLDLDKDNRPSATEALAHEYFAQFHDPSDEPTAEPFDDEFEKMDLQLNEWKEKIFQ	174	12.3	-	9	9	3	3	1.098	1.053	0.913	7	7	7	-	-	-	Unigene22385_All	68.24	5e-123	gi|148690640|gb|EDL22587.1|	mitogen activated protein kinase 14, isoform CRA_d [Mus musculus]	67.79	2e-136	sp|P47812|MK14_XENLA	Mitogen-activated protein kinase 14 OS=Xenopus laevis GN=mapk14 PE=2 SV=1	69.26	5e-108	D3K4J3	D3K4J3_CRIGR Mitogen-activated protein kinase 14 (Fragment) OS=Cricetulus griseus GN=MAPK14 PE=2 SV=1	YBL016w	281	1e-75	COG0515	Serine/threonine protein kinase	RTKL	General function prediction only ; Signal transduction mechanisms ; Transcription ; Replication, recombination and repair ;	K04441|1|2e-136|485|xla:379992|p38 MAP kinase [EC:2.7.11.24]	GO:0006006//glucose metabolic process;GO:0023014//signal transduction by phosphorylation;GO:0019395//fatty acid oxidation;GO:0051149//positive regulation of muscle cell differentiation;GO:0048813//dendrite morphogenesis;GO:0006915//apoptotic process;GO:0034138//toll-like receptor 3 signaling pathway;GO:0071479//cellular response to ionizing radiation;GO:0061337//cardiac conduction;GO:0090400//str…	GO:0033613//activating transcription factor binding;GO:0008022//protein C-terminus binding;GO:0051525//NFAT protein binding;GO:0003705//RNA polymerase II distal enhancer sequence-specific DNA binding transcription factor activity;GO:0001105//RNA polymerase II transcription coactivator activity;GO:0004707//MAP kinase activity;GO:0001085//RNA polymerase II transcription factor binding;GO:0001077//R…	GO:0000790//nuclear chromatin;GO:0044445//cytosolic part;GO:0005654//nucleoplasm;GO:0000922//spindle pole;GO:0005739//mitochondrion
298	Unigene9086_All	58 537 predicted protein [Hordeum vulgare subsp. vulgare]	21031	PGEMGKPVIIEPEFQEEAERLFRINEFNLMATDRIALNRSLPDVRPKGCINKPYPTNLPTTSVILIYHNEAWSTLLRNVHSIINRSPRHLLEEIILIDDASDQEHLGQKLKDYVAKLPVPVITDKLPERSGLIRARMRGAELAKGNVLTFLDSHCECTEG	51	5.6	-	3	3	1	1	0.682	0.941	0.974	2	2	2	*	-	-	Unigene9086_All	78.34	3e-65	gi|390336582|ref|XP_001187912.2|	PREDICTED: polypeptide N-acetylgalactosaminyltransferase 1-like [Strongylocentrotus purpuratus]	65	1e-59	sp|Q07537|GALT1_BOVIN	Polypeptide N-acetylgalactosaminyltransferase 1 OS=Bos taurus GN=GALNT1 PE=1 SV=1	78.75	1e-66	H3IDR4	H3IDR4_STRPU Uncharacterized protein OS=Strongylocentrotus purpuratus GN=SPU_012221gn PE=3 SV=1	-	-	-	-	-	-	-	K00710|1|1e-59|228|bta:282241|polypeptide N-acetylgalactosaminyltransferase [EC:2.4.1.41]	GO:0018242//protein O-linked glycosylation via serine;GO:0018243//protein O-linked glycosylation via threonine;GO:0043687//post-translational protein modification;GO:0016266//O-glycan processing	GO:0030145//manganese ion binding;GO:0004653//polypeptide N-acetylgalactosaminyltransferase activity;GO:0030246//carbohydrate binding	GO:0032580//Golgi cisterna membrane;GO:0016021//integral to membrane;GO:0048471//perinuclear region of cytoplasm;GO:0005576//extracellular region
299	Unigene1865_All	152 937 minus strand hypothetical protein VOLCADRAFT_107595 [Volvox carteri f. nagariensis] >gi|300257508|gb|EFJ41756.1| hypothetical protein VOLCADRAFT_107595 [Volvox carteri f. nagariensis]	33003	EMPIERFLGRVALLTGATQGIGLATARRLAQEGCKVVLSSRKQENVDEAIETLNKEGLQVSGLVGNQRVKEDRKKLVEYTLKKYGGLDCVFMSAGVNPHNGNLITVTEEQFDRCFDTNLKANFNFIQEIVPIMEKRGGGTIVTNSTASAYGAVQSFGASNLLLYTISKMALISMVQHVARDCFDRNVRVNCVAPGAVDTNFLAGGTEDSNFNTYWNVAGIKKGEPSSRLGHPNEIASVVAFLLSDDSSYVCGNCIIPSGGYH	370	13	-	13	13	3	3	0.94	1.276	0.755	12	12	13	-	-	-	Unigene1865_All	51.13	2e-31	gi|13507612|ref|NP_109611.1|	dehydrogenase/reductase SDR family member 4 isoform 2 [Mus musculus] >gi|148704354|gb|EDL36301.1| dehydrogenase/reductase (SDR family) member 4, isoform CRA_c [Mus musculus]	45.36	5e-38	sp|Q6PKH6|DR4L2_HUMAN	Dehydrogenase/reductase SDR family member 4-like 2 OS=Homo sapiens GN=DHRS4L2 PE=2 SV=1	45.6	4e-38	F6QUD5	F6QUD5_MACMU Uncharacterized protein OS=Macaca mulatta GN=Mmu.18418 PE=3 SV=1	TM1724	138	1e-32	COG1028	Dehydrogenases with different specificities (related to short-chain alcohol dehydrogenases)	IQR	Lipid transport and metabolism ; Secondary metabolites biosynthesis, transport and catabolism ; General function prediction only ;	K11147|1|8e-53|207|xtr:548501|dehydrogenase/reductase SDR family member 4 [EC:1.1.-.-]	-	-
300	Unigene6902_All	1 576 predicted protein [Ostreococcus lucimarinus CCE9901] >gi|144578743|gb|ABO96807.1| predicted protein [Ostreococcus lucimarinus CCE9901]	25763	AESSVDLNLKLMRWRLIQELDLEKVQQTKCLLLGAGTLGCNVARCLIGWGVRTVTFVDNSTVSYSNPVRQSLFEFEDSQNGGKPKAATAAEKLKKIFPGVTSSGHQFSIPMPGHAVGKSEAALKQVQEDVGKLEALIESHDVIYLLMDTRESRWLPTLIAASKRKLVVNAALGFDTYLVLRHGLKTDESEGS	38	9.9	-	3	3	2	2	0.772	1.067	0.774	2	2	2	-	-	-	Unigene6902_All	78.38	1e-11	gi|449688530|ref|XP_002169373.2|	PREDICTED: ubiquitin-like modifier-activating enzyme ATG7-like [Hydra magnipapillata]	71.35	8e-79	sp|Q641Y5|ATG7_RAT	Ubiquitin-like modifier-activating enzyme ATG7 OS=Rattus norvegicus GN=Atg7 PE=2 SV=1	76.76	8e-83	H3IDS2	H3IDS2_STRPU Uncharacterized protein OS=Strongylocentrotus purpuratus GN=SPU_012229gn PE=4 SV=1	SPBC6B1.05c	232	2e-61	COG0476	Dinucleotide-utilizing enzymes involved in molybdopterin and thiamine biosynthesis family 2	H	Coenzyme transport and metabolism ;	K08337|1|3e-83|307|spu:588017|autophagy-related protein 7	GO:0021860//pyramidal neuron development;GO:0021680//cerebellar Purkinje cell layer development;GO:0043066//negative regulation of apoptotic process;GO:0031396//regulation of protein ubiquitination;GO:0016044//cellular membrane organization;GO:0006497//protein lipidation;GO:0016239//positive regulation of macroautophagy;GO:0009791//post-embryonic development;GO:0015031//protein transport;GO:00076…	GO:0000166//nucleotide binding;GO:0004839//ubiquitin activating enzyme activity;GO:0019778//APG12 activating enzyme activity;GO:0042803//protein homodimerization activity	GO:0005737//cytoplasm
301	Unigene58771_All	1 462 LEN=462; translated	22871	VYVKAVLPLCTKVVRCIQAFFEYYEGLELEEWKECLPDILQDVTGYQQCCTEIVRMHEETIVPLNKRHAKVKELISDLNDRKKEHMKKKPKLNEGAAKSQGWAGRWKGVFVFPSLNRSAEGDLTKVTADDLQANINSAATKAISDDLIPAIADF	26	5.2	-	2	2	1	1	---	---	---	-	-	-	-	-	-	Unigene58771_All	-	-	-	-	-	-	-	-	-	-	-	-	-	-	-	-	-	-	-	-	-	-
302	Unigene19076_All	352 1485 minus strand alpha-2 macroglobulin family-like protein [Micromonas sp. RCC299] >gi|226515106|gb|ACO61102.1| alpha-2 macroglobulin family-like protein [Micromonas sp. RCC299]	49547	VLLFAMFLWICCLVLVRVQLTAAQPSHIFVSAPNIIRAGNIETVLVSVFDTEEVPVTVTLKNGDGSNICPPVLVQVNPDNPQIVSLYVDPENVPQVETEDDLKVYAKLEVTCPPLNNFQEEKDVLISYEEGFVFIQTDKPIYTPDQRVNIRLLVLDQYLRPSSEPVQLDVLSPQGVIVHRSADIRARNGFKTRVFSFPHEPLFGNWSVVAQYGKGLKSNRSVQFEVKEYVLPTFEVKLTTPGYILDGQEAVDITVSARYVYDKPVLGVFYAKVGVLGFDGEIDIKVKKSGQMLATGLGHFRINMEDLGENWFAEYEGRRLYLEVSVLESASGLSENVSDISTKFVQSPYQFKWDRTVRWFKKGLPYEVKVDLTYPNGK	329	15.6	-	16	16	5	5	1.279	1.541	0.802	14	15	15	*	*	-	Unigene19076_All	98.66	0	gi|307950523|gb|ADN97000.1|	complement component C3 [Apostichopus japonicus]	38.06	2e-21	sp|Q7SIH1|A2MG_BOVIN	Alpha-2-macroglobulin OS=Bos taurus GN=A2M PE=1 SV=2	98.66	0	E2JF18	E2JF18_STIJA Complement component C3 OS=Stichopus japonicus PE=2 SV=1	-	-	-	-	-	-	-	K03990|1|3e-46|186|spu:373284|complement component 3!K06530|2|5e-42|172|nve:NEMVE_v1g210666|CD109 antigen!K03994|5|2e-36|153|xtr:100485433|complement component 5	-	-
303	Unigene29092_All	160 2145 minus strand hypothetical protein PHYSODRAFT_519994 [Phytophthora sojae]	85974	MFYAHFVLSKKGPLARIWLAAHWDKKLTKAHVYETNVSSCVDSIMHPKVKLALRTSGHLLLGVVRIHSRKAKYLLADCNEAFVKIKMAFRPGVVDLPEENREAAFATITLPEVFHDFDTSIPDFNDVEVQKQFSLNQSRVEDITMKEDLVNINLGQEDFGDLGFDDREMLREASAANDSTYKQSDESTLLADGSKTKEAPIDASMDKPMDMGLEEQFRNDGFGAEMGMGDGILGDEFMNEGGNLFEEQPEIQAGEPVVVQNVEPPPGAAEDTDDEEKEPEPPKAPVVPATPTPQDGQIKAAAAAPATAPEGAPPISDATLMQPPAAADQTTLVQNEDMEFALQPIVDVTGVKESRQKRKRKLVVDEVKELAGDLIKSQLKDTSDIVTSLDLAPPTKKLM…	30	2.4	-	2	2	2	2	---	---	---	1	1	1	-	-	-	Unigene29092_All	85.29	2e-47	gi|193783639|dbj|BAG53550.1|	unnamed protein product [Homo sapiens]	62.96	2e-29	sp|O93310|RAD21_XENLA	Double-strand-break repair protein rad21 homolog OS=Xenopus laevis GN=rad21 PE=1 SV=1	85.29	8e-47	B3KUT8	B3KUT8_HUMAN Uncharacterized protein OS=Homo sapiens GN=RAD21 PE=2 SV=1	-	-	-	-	-	-	-	K06670|1|2e-154|546|spu:575281|cohesin complex subunit SCC1	GO:0007049//cell cycle;GO:0071168//protein localization to chromatin;GO:0006974//response to DNA damage stimulus	-	GO:0044446//intracellular organelle part;GO:0005694//chromosome;GO:0005634//nucleus
304	CL7984.Contig1_All	370 1782 minus strand hypothetical protein PRUPE_ppa004802mg [Prunus persica]	60940	SCCSGPGYATPEDATHAPPEGLLYTTCVYRGVDSKKPDFLATVDVDPLSPTYCQVIHRLPMPYLDDEIHHSGWNSCSSCFNDPSKSRNRLILPCLSSSRIYVVDTGSHPRAPKLHKIVEPEEVAEGSGLLNPHTSHCLGSGEVLVSAMGDAKNPGEGKGGFLLLDGETFKVKGNWEAPGFNPSFGYDFWYQPYHKVLISTEWGAPKAFLKGFDPNDYANGLYGKSLHVWDWDSHKYLQEINLGDEGGIPLEIRFLHNPRASEGFVGCALASSVYRFYKASNGSWEAEKVIQVPPKKVDGWALPNMPGLITDILLSMDDRFLYFSNWIHGDIRQYDVSDTRNPKLVGQLFLGGSITADGPVKVTHDEELQEQPPSVYVKGREVTGGPQMLQLSLDGKRLY…	2709	35.9	-	102	102	13	13	1.089	0.952	1.261	83	85	85	-	-	*	CL7984.Contig1_All	82.69	6e-18	gi|149602096|ref|XP_001519113.1|	PREDICTED: selenium-binding protein 1-like, partial [Ornithorhynchus anatinus]	69.16	0	sp|Q569D5|SBP1_XENTR	Selenium-binding protein 1 OS=Xenopus tropicalis GN=selenbp1 PE=2 SV=1	70.07	3e-172	Q28CY4	Q28CY4_XENTR Selenium binding protein 1 OS=Xenopus tropicalis GN=selenbp1 PE=2 SV=1	-	-	-	-	-	-	-	K01090|1|2e-34|147|cel:F42G8.8|protein phosphatase [EC:3.1.3.16]	GO:0015031//protein transport	GO:0008430//selenium binding	GO:0016020//membrane;GO:0005829//cytosol;GO:0005634//nucleus
305	Unigene20712_All	291 1031 LEN=1234; minus strand; translated	30952	MARSVISVLMIIAVLGFAKAATTAATTATMTTAGPTITGTNEKMTTNAMTTEDKMTTRMVQTTATPQPNLPTFYAQTVDGEVCMIISINAIISLETQEGDKIQSDIPETASIVKGPEECPKDLETAYIELVWNVDEHDWTLGLSFEAMENDYTVVLVNGSYSEDTDNGTTLINEWEVKDFEFASAPLGNSLHCKDVHLDYIHFVEYKFQPFAQRNDGKFGKVVECSSEEEGLSTMWIIIISVCGGAV	154	13.4	-	6	6	3	3	1.557	1.043	0.476	4	4	5	*	-	-	Unigene20712_All	29.95	2e-07	gi|72088721|ref|XP_800623.1|	PREDICTED: uncharacterized protein LOC590810 [Strongylocentrotus purpuratus]	-	-	-	-	-	-	-	-	-	-	-	-	-	-	-	-	-	-
306	Unigene18984_All	282 746 predicted protein [Micromonas pusilla CCMP1545] >gi|226460945|gb|EEH58239.1| predicted protein [Micromonas pusilla CCMP1545]	18970	WTAIAVTCSDQKIAAAVQKELEIRQRKGFIDNNTLLLTVEDPQARVGSGGATLNALLVVAEHLSQQHGFTVVNSDVLLTSRILILHLGRNYPFSSCGKAFVNLPAQRVASQTTKPDDLLTNIDFILDTISSKLSPGSPPGVWVSSTDMMLHVPDT	74	5.2	-	3	3	1	1	0.732	0.9	0.47	3	3	3	-	-	-	Unigene18984_All	72.86	4e-22	gi|390335631|ref|XP_785733.3|	PREDICTED: trafficking protein particle complex subunit 8-like [Strongylocentrotus purpuratus]	56.21	3e-35	sp|Q8N0W3|FUK_HUMAN	L-fucose kinase OS=Homo sapiens GN=FUK PE=2 SV=2	66.67	2e-21	H3HVB1	H3HVB1_STRPU Uncharacterized protein OS=Strongylocentrotus purpuratus GN=SPU_005637gn PE=4 SV=1	-	-	-	-	-	-	-	K05305|1|2e-36|151|oaa:100075033|fucokinase [EC:2.7.1.52]	-	-
307	Unigene18845_All	33 989 uncharacterized protein LOC100273271 [Zea mays]	40051	ACMRIVARNIVPKVGVRTCYTETRPNLLINSETKVICQGITGKQGAFHTTQAIEYGTNMVGGVTPGKGGQQSCGIPVFNSVKDAKDATGADATVIYVPAKFTAAAIMEAMDAEIGLVVCITEGIPQQDMVKVKHRLVRQNKTRLVGPNCPGIIKPGQCKIGIMPGHIHQPGKIGIVSRSGTLTYEAVAQTTAVGLGQSLCVGIGGDPFNGTNFVDCLDIFMNDPQTEGIVLIGEIGGGAEEAAAKYIAENNVGTRRKPIAAFIAGKTAPPGRRMGHAGAIIAGGKGGADEKIKALEEAGVAVTSSPAQIGTTIYKEMER	198	22.9	-	9	9	5	5	1.023	1.099	0.955	7	8	8	-	-	-	Unigene18845_All	87.5	2e-42	gi|12621910|gb|AAB94002.2|	succinyl-CoA synthetase [Sus scrofa]	74.67	6e-99	sp|Q9YGD2|SUCA_COLLI	Succinyl-CoA ligase subunit alpha, mitochondrial (Fragment) OS=Columba livia GN=SUCLG1 PE=1 SV=1	82.55	1e-93	H3JFQ2	H3JFQ2_STRPU Uncharacterized protein (Fragment) OS=Strongylocentrotus purpuratus GN=SPU_025397gn PE=3 SV=1	RC0598	393	2e-109	COG0074	Succinyl-CoA synthetase, alpha subunit	C	Energy production and conversion ;	K01899|1|3e-111|401|spu:581456|succinyl-CoA synthetase alpha subunit [EC:6.2.1.4 6.2.1.5]	GO:0006099//tricarboxylic acid cycle;GO:0044281//small molecule metabolic process	GO:0016874//ligase activity;GO:0000166//nucleotide binding	GO:0005759//mitochondrial matrix;GO:0005886//plasma membrane
308	Unigene22318_All	334 1548 RecName: Full=Acyl-coenzyme A oxidase, peroxisomal; Short=AOX; AltName: Full=Long-chain acyl-CoA oxidase; Flags: Precursor >gi|3115374|gb|AAC15870.1| acyl CoA oxidase homolog [Cucurbita cv. Kurokawa Amakuri]	51857	SLDEYREVTQKRVRRLVEYNMNSLAQNSNIETAMAWNQAILMYDSALSAKYNLNAMMCAVALIQTGKPHFQELAQKFENLEAVGCFCLTELSHGSNTKAMRTTATFDPQTDEFVLHTPDFEASKFWVGLLGKTATHGIVFAQLYTPDGHCHGLHNFLVPFRDLQTHLPLPGILVGDIGMKLGQNGLDNGFVAFNQVRIPRESLMDRTGSVTKEGKYVTPFKDPSKRFGAALGALSGGRVGITDMCTTNLKLAVTIAIRYSGVRRQFGPTKGEEIPVLEYQLQQWRLIPYVAATYVMHVASRKLFMNFRDSTMAQLMKDRSEKQANLGKEIHAFSSSSKPLGAWLARDCIQECREACGGHGYLWVNRLGSLRDDNDPNCTYEGDNNVLQQQTGNYLLEVA…	1023	28.9	-	42	42	9	9	1.277	1.101	4.491	31	30	32	*	-	-	Unigene22318_All	68.9	3e-117	gi|405958015|gb|EKC24184.1|	Peroxisomal acyl-coenzyme A oxidase 3 [Crassostrea gigas]	58.15	8e-136	sp|Q9EPL9|ACOX3_MOUSE	Peroxisomal acyl-coenzyme A oxidase 3 OS=Mus musculus GN=Acox3 PE=2 SV=2	63.41	4e-122	F7DPR5	F7DPR5_MACMU Uncharacterized protein OS=Macaca mulatta GN=ACOX3 PE=3 SV=1	YGL205w	211	2e-54	COG1960	Acyl-CoA dehydrogenases	I	Lipid transport and metabolism ;	K00232|1|7e-152|537|spu:580963|acyl-CoA oxidase [EC:1.3.3.6]	GO:0033540//fatty acid beta-oxidation using acyl-CoA oxidase	GO:0016402//pristanoyl-CoA oxidase activity;GO:0005102//receptor binding	GO:0005782//peroxisomal matrix
309	Unigene17337_All	153 572 minus strand predicted protein [Populus trichocarpa] >gi|222838256|gb|EEE76621.1| predicted protein [Populus trichocarpa]	20692	PDDKQLVFIKDQSCAIYDHMEYLPDVPTRHVFLIRHPRNVYPSLKQIFTNNTEFTQLPWDETNLIEELPSMPIKDHFKIHRDLWKKIKNKLDPDVIVIDGHDLASRPEVILPKFFTELGIPYKESYLKWEADPELVYSSW	106	42.1	-	8	8	4	4	1.994	1.024	1.66	3	4	4	*	-	-	Unigene17337_All	36.72	9e-11	gi|390332377|ref|XP_003723485.1|	PREDICTED: uncharacterized protein LOC100889781 [Strongylocentrotus purpuratus]	-	-	-	-	38.03	1e-13	H3JNG1	H3JNG1_STRPU Uncharacterized protein OS=Strongylocentrotus purpuratus GN=SPU_028156gn PE=4 SV=1	-	-	-	-	-	-	-	-	-	-
310	Unigene11954_All	300 602 conserved hypothetical protein [Albugo laibachii Nc14]	13069	QISIGASSGWVAGYLFQKVGKLAATAVGGGFFLILVGHQTGYLRIDWQRVERDVSKTQSRITREAEQRLPQVSGLFHQAKDLIKKNVILSGSFGAGFLLGV	44	11.9	-	1	1	1	1	---	---	---	1	1	1	-	-	-	Unigene11954_All	73.53	2e-06	gi|148703777|gb|EDL35724.1|	FUN14 domain containing 1, isoform CRA_c [Mus musculus] >gi|149044356|gb|EDL97677.1| FUN14 domain containing 1, isoform CRA_d [Rattus norvegicus]	53.41	3e-24	sp|B1H3B1|FUND1_XENTR	FUN14 domain-containing protein 1 OS=Xenopus tropicalis GN=fundc1 PE=2 SV=1	73.53	8e-06	H3BJZ1	H3BJZ1_MOUSE FUN14 domain containing 1, isoform CRA_c OS=Mus musculus GN=Fundc1 PE=4 SV=1	-	-	-	-	-	-	-	-	GO:0000422//mitochondrion degradation;GO:0001666//response to hypoxia	GO:0005515//protein binding	GO:0031307//integral to mitochondrial outer membrane
311	CL8807.Contig1_All	233 2491 secretory protein 23A [Guillardia theta CCMP2712] >CL8807.Contig2_All 282 2540 minus strand secretory protein 23A [Guillardia theta CCMP2712]	95871	EDRDGIRFTWNVWPSSRLEATRMVVPLTGLYTPLKERPDLPPIQYDPVLCARSTCRAILNPFCQVDYRAKLWTCNFCFQRNQFPPQYRGISEQHQPAELIPQFSTIEYTLTRAPPMPLIYLIVLDTCMEEDDLQALKESLQMSLSLLPPNALIGLITFGRMVQVHELGCEGVSKCYVFRGTKDLTAKQIQEMLGIGKAQGQVRGQQQQPQQQQQQPMNKFLQPVHKCDMNLTDLLGELQRDPWPVGQAKRPLRSAGVALSIAVGLLECTFPNAGSRIMLFLSGPCTQGPGMVVGDELKTPIRSHHDIEKDNAKFMRKAIKHYDNLANRAAQNGHTIDIYSCALDQTGLHEMKNCCNFTGGHMVMGDSFNTSLFKQTFQRVFSKDVKGEFKMAFGATLEI…	298	13.3	-	19	19	8	8	1.107	0.99	1.138	16	15	16	-	-	-	CL8807.Contig1_All	84.59	0	gi|72109181|ref|XP_780042.1|	PREDICTED: protein transport protein Sec23A isoform 1 [Strongylocentrotus purpuratus]	77.45	0	sp|Q7SZE5|SC23A_DANRE	Protein transport protein Sec23A OS=Danio rerio GN=sec23a PE=2 SV=1	86	0	H3J0L3	H3J0L3_STRPU Uncharacterized protein OS=Strongylocentrotus purpuratus GN=SPU_020029gn PE=4 SV=1	SPCC31H12.07	873	0	COG5047	Vesicle coat complex COPII, subunit SEC23	U	Intracellular trafficking, secretion, and vesicular transport ;	K14006|1|0.0|1338|spu:576977|protein transport protein SEC23	GO:0051216//cartilage development;GO:0035138//pectoral fin morphogenesis;GO:0006888//ER to Golgi vesicle-mediated transport;GO:0006886//intracellular protein transport;GO:0048702//embryonic neurocranium morphogenesis	GO:0008270//zinc ion binding	GO:0000139//Golgi membrane;GO:0030868//smooth endoplasmic reticulum membrane;GO:0030127//COPII vesicle coat;GO:0048471//perinuclear region of cytoplasm
312	Unigene30483_All	117 401 coiled-coil-helix-coiled-coil-helix domain-containing protein 5 [Galdieria sulphuraria]	13378	MEAVMTLVMKYCSSELEDYAACVANNPQTWNTDCEEQKLKAADCSSNSPAVKKINKVCAEQYVAYEKCLNSNPESVEVCVNQLQSFLECAEAAAR	26	11.6	-	1	1	1	1	---	---	---	1	1	1	-	-	-	Unigene30483_All	51.06	2e-20	gi|390350354|ref|XP_003727392.1|	PREDICTED: coiled-coil-helix-coiled-coil-helix domain-containing protein 5-like [Strongylocentrotus purpuratus]	40.66	2e-18	sp|Q9CQP3|CHCH5_MOUSE	Coiled-coil-helix-coiled-coil-helix domain-containing protein 5 OS=Mus musculus GN=Chchd5 PE=2 SV=1	46.67	2e-18	C3ZCQ3	C3ZCQ3_BRAFL Putative uncharacterized protein OS=Branchiostoma floridae GN=BRAFLDRAFT_124473 PE=4 SV=1	-	-	-	-	-	-	-	K15180|1|8e-13|72.0|spu:575589|negative elongation factor B	-	-
313	Unigene60101_All	1 554 LEN=554; translated	25132	XVVKKVRFYHSLFCEWYAAHYVASIISSNSPGQKPEDRASEILEDFDLSKFQYMYRFACGLSPTAAIHIIRYVQGAEGSDKFATLCILEQKGAVNDVINTVKELCSKTIHISNVDSRLLQRSVVQLLAIAFSKKLIIPSLILHEAFSSVDTVRAEIILKSGLRLSTQNTFKELWIEQNGARITEQX	17	5.4	-	1	1	1	1	---	---	---	-	-	-	-	-	-	Unigene60101_All	-	-	-	-	-	-	-	-	-	-	-	-	-	-	-	-	-	-	-	-	-	-
314	Unigene16501_All	110 484 minus strand hypothetical protein GUITHDRAFT_156870 [Guillardia theta CCMP2712]	17943	LSGNSLGLQPKKTRFYMDQELNKWGKYGVHGHFLGDIPWAFCDEVMQVDMSKLVGANPEEVAIMNGLTVNLHLLMVSFYRPTEKRHKILIESKAFPADHYAMESQICNKGYDPKSSLLCLKPSQG	97	20	-	3	3	2	2	0.671	1.573	0.853	3	3	3	-	-	-	Unigene16501_All	69.11	4e-48	gi|390346745|ref|XP_001184983.2|	PREDICTED: LOW QUALITY PROTEIN: kynureninase-like [Strongylocentrotus purpuratus]	57.6	1e-37	sp|Q18026|KYNU_CAEEL	Kynureninase OS=Caenorhabditis elegans GN=C15H9.7 PE=2 SV=1	69.39	2e-36	H3HPN3	H3HPN3_STRPU Uncharacterized protein (Fragment) OS=Strongylocentrotus purpuratus GN=SPU_003632gn PE=4 SV=1	YLR231c	106	9e-24	COG3844	Kynureninase	E	Amino acid transport and metabolism ;	K01556|1|2e-44|177|bfo:BRAFLDRAFT_283826|kynureninase [EC:3.7.1.3]	GO:0019363//pyridine nucleotide biosynthetic process;GO:0019915//lipid storage	GO:0016787//hydrolase activity	-
315	CL5929.Contig4_All	709 2955 minus strand hypothetical protein SELMODRAFT_98006 [Selaginella moellendorffii] >gi|302823451|ref|XP_002993378.1| hypothetical protein SELMODRAFT_136955 [Selaginella moellendorffii] >gi|300138809|gb|EFJ05563.1| hypothetical protein SELM	107261	QPRKDTRMRIRAFPTSMDEKYVANIWDLLHNAIQEIQRKNNSGLSFEELYRNAYTMVLHKHGERLYKGLRDVVTSHLVEKVRVEILNSLNNNFLQTLNAAWNDHQTAMVMIRDILMYMDRVYVQQNNVDNVYNLGLKIFRDQVVRYGNIREHLQQTLLDMVMRERRGEVVDRLAVKNACQMLMVLGIETRTVYEEDFEQPFLEQSADFYTMESQNFLTENSASVYIRKVEARINEETERALHCLDKSTEDPIVKVLEEELISKHMKTVVEMENSGVVHMLQNNKKEDLACMYKLFIRVASGLETMCKCISGYLREQGKALVQEEDGGGGKQPIQYVQDLLELKDNFDMFLKESFSSDRKFKQTISGDFEFFLNLNPKSPEYLSLFIDDKLKKGVKGLSE…	58	3.6	-	2	2	2	2	0.674	1.048	0.911	2	2	2	-	*	-	CL5929.Contig4_All	84.66	0	gi|390346964|ref|XP_795055.3|	PREDICTED: cullin-3-B-like [Strongylocentrotus purpuratus]	76.32	0	sp|B5DF89|CUL3_RAT	Cullin-3 OS=Rattus norvegicus GN=Cul3 PE=1 SV=2	84.57	0	H3J3N0	H3J3N0_STRPU Uncharacterized protein OS=Strongylocentrotus purpuratus GN=SPU_021121gn PE=3 SV=1	SPAC24H6.03	480	5e-135	COG5647	Cullin, a subunit of E3 ubiquitin ligase	O	Posttranslational modification, protein turnover, chaperones ;	K03869|1|0.0|1204|bfo:BRAFLDRAFT_275695|cullin 3	GO:0008054//cyclin catabolic process;GO:0017145//stem cell division;GO:0007369//gastrulation;GO:0016055//Wnt receptor signaling pathway;GO:0006513//protein monoubiquitination;GO:0035024//negative regulation of Rho protein signal transduction;GO:0040016//embryonic cleavage;GO:0007229//integrin-mediated signaling pathway;GO:0007050//cell cycle arrest;GO:0008284//positive regulation of cell prolifer…	GO:0004842//ubiquitin-protein ligase activity;GO:0031625//ubiquitin protein ligase binding;GO:0030332//cyclin binding	GO:0005794//Golgi apparatus;GO:0005827//polar microtubule;GO:0005634//nucleus;GO:0031463//Cul3-RING ubiquitin ligase complex
316	Unigene25768_All	84 782 repressor protein [Zea mays] >gi|195634677|gb|ACG36807.1| repressor protein [Zea mays] >gi|407232566|gb|AFT82625.1| CA5P8 CCAAT-HAP5 type transcription factor, partial [Zea mays subsp. mays] >gi|414591514|tpg|DAA42085.1| TPA: Repressor pro	33456	KKKFNARFPPARIKKIMQTDEEVGKVAAAVPVLISKALEHFIQDLLVKASRQTLEKNAKTLTTSHIKQCIHREKVFDFLKDLVVDIPDLQNTKDNSTSSNSGQSTRQKKAGRGKKRKTKASHSNSFSDEESSENEEDGDEEEEDLYDENSSGSRTTVSPSGSQSYNSNFTEGSSSREEQTHEADQPGPSYVDLKTMNPSKSAHMNFSCPVPMGQYTPRKVSTEQTLEDDEDYD	27	2.6	-	1	1	1	1	---	---	---	1	1	1	-	-	-	Unigene25768_All	76.47	1e-07	gi|350412776|ref|XP_003489758.1|	PREDICTED: dr1-associated corepressor-like [Bombus impatiens]	66.99	1e-34	sp|A0JPP1|NC2A_RAT	Dr1-associated corepressor OS=Rattus norvegicus GN=Drap1 PE=2 SV=1	74.16	1e-29	A7S4W7	A7S4W7_NEMVE Predicted protein (Fragment) OS=Nematostella vectensis GN=v1g47437 PE=4 SV=1	SPAC17G8.03c	94.7	1e-19	COG5247	Class 2 transcription repressor NC2, alpha subunit (DRAP1 homolog)	K	Transcription ;	K08066|1|5e-11|68.2|aga:AgaP_AGAP000441|nuclear transcription factor Y, gamma	GO:0000122//negative regulation of transcription from RNA polymerase II promoter	GO:0043565//sequence-specific DNA binding;GO:0003714//transcription corepressor activity;GO:0003700//sequence-specific DNA binding transcription factor activity;GO:0008134//transcription factor binding;GO:0046982//protein heterodimerization activity	GO:0005634//nucleus
317	Unigene31791_All	7 408 ornithine decarboxylase [Erythroxylum coca]	19051	DVIRRLINERSLYQNSDDAFYVMDMGYQVKMVDQWKRLLPKVYPYYAVKANPDPVLLQIFAKMNFGFDCASLHEIQTILNLNVQPSRIVHAQPHKQTSHLKYAAAVGVEMTVFDDENELYKIKKIAPNMRLLLR	17	9.7	-	1	1	1	1	---	---	---	-	-	-	-	-	-	Unigene31791_All	52.07	3e-28	gi|156392831|ref|XP_001636251.1|	predicted protein [Nematostella vectensis] >gi|156223352|gb|EDO44188.1| predicted protein [Nematostella vectensis]	47.93	3e-28	sp|Q8S3N2|DCOR_CAPAN	Ornithine decarboxylase OS=Capsicum annuum GN=ODC PE=2 SV=1	52.07	1e-27	A7RWL7	A7RWL7_NEMVE Predicted protein OS=Nematostella vectensis GN=v1g96024 PE=3 SV=1	SPAC144.04c	124	3e-29	COG0019	Diaminopimelate decarboxylase	E	Amino acid transport and metabolism ;	K01581|1|3e-29|126|nve:NEMVE_v1g96024|ornithine decarboxylase [EC:4.1.1.17]	GO:0042462//eye photoreceptor cell development	GO:0003824//catalytic activity	-
318	Unigene11500_All	245 1693 PREDICTED: flavonoid 3&apos;-monooxygenase-like [Glycine max]	63910	NLQTLLLFGVVFLTAIWWMSGPKNLPPGPTPLPIIGNLFHFFGKKNYKVFYEIFQNYGGICTVYLGRARTILITDINIVKETATKQADNFSDRFLPPILAWTVGSDGSLFFQNGPVWKERRKFTMQALRNFGVGKKSLEYKINEEARCLMDVMTGIEGPFDPSEYTTLTIANVICNINFGKRFDYKDKHFQDIINRFRFLIASVSLTGLPNSFPFLLRTPLYSHIGRSLDYMKAYIGGHLKEHQQTLNEDDVRDYIDMYLLEIKRQQESGEEVIFKPEQAWRAIMEIFGGGTDTTTNTLLYGILLTSLHTEVQDKVQEEIDRVIGTNRQPSYEDRTNMPYTEAVLMEIQRFRPVVVIVPPHGVFHDTQLAGYNIPKGSQIFFNLWGLLHDPKVWKNPDQ…	274	16.4	-	12	5	6	2	1.007	1.024	1.096	5	5	5	-	-	-	Unigene11500_All	46.81	2e-16	gi|348504416|ref|XP_003439757.1|	PREDICTED: cytochrome P450 2J2-like [Oreochromis niloticus]	41.83	9e-41	sp|Q29478|CP2CV_CAPAE	Cytochrome P450 2C31 (Fragment) OS=Capra aegagrus GN=CYP2C31 PE=2 SV=1	42.44	3e-101	H3J2L7	H3J2L7_STRPU Uncharacterized protein OS=Strongylocentrotus purpuratus GN=SPU_020754gn PE=3 SV=1	BH0579	122	2e-27	COG2124	Cytochrome P450	Q	Secondary metabolites biosynthesis, transport and catabolism ;	K07422|1|1e-85|317|bfo:BRAFLDRAFT_61918|cytochrome P450, family 2, subfamily U!K07417|4|2e-81|303|spu:586945|cytochrome P450, family 2, subfamily G	GO:0008152//metabolic process	GO:0016491//oxidoreductase activity	GO:0044425//membrane part
319	Unigene15155_All	231 1595 minus strand hypothetical protein PHYSODRAFT_502603 [Phytophthora sojae]	66149	FDAFVDAPNLTEISECFTKLCESKGITPFEDHTTFFETLKEQTLSNWKAKELWELIQKRANRKEYNKGKACTDIKVLIIGAGPCGLRTAIELVFLGAKVVVIEKRDRFTRNNVLYLWPYLITDLTNLGAKKLYGGFGAGDINHISIIKLQTILLKVALLLGVEIHHSVEFVKLDEKPKKEGWRANVNPKDHKVSKFEFNYILAADGRQHTLPGFTWKESARTLAIGITTNYVNRHSQRDACTKEIPGKSYIYDQDFFQGLKKAYNIELENIVYYKDETHYFVMTAKKTSLLEKGVLKKDEADTNSLLAANNINNNKLEEYAYQAAHYATEEKLPTSDCAKNYKGKPDIAMFDFTSRKQAKQAALSIEADGKVLILGVVGDSLKEPFWPEGTGCALGFLG…	52	4.8	-	2	2	2	2	0.961	1.159	1.846	2	2	2	-	-	-	Unigene15155_All	56.8	5e-117	gi|311901071|gb|ADQ13086.1|	molecule interacting with CasL 1 [Danio rerio]	53.74	9e-136	sp|E7F9T0|MICA1_DANRE	Protein-methionine sulfoxide oxidase mical1 OS=Danio rerio GN=mical1 PE=3 SV=1	59.77	4e-43	E5F2M6	E5F2M6_DANRE Molecule interacting with CasL 3b (Fragment) OS=Danio rerio GN=mical3b PE=2 SV=1	-	-	-	-	-	-	-	-	GO:0009987//cellular process	GO:0005488//binding;GO:0016491//oxidoreductase activity	-
320	CL9154.Contig1_All	669 1940 LEN=2949; translated	57702	MAFREDDLAGQFRYLEGYVELRVNKDTYQKVFCILNANTLSFYEKKRTQRELERIKPMEVANLTFKKTSFKVDELKLTVKNASRLNTNSDLKLRFTTTEERDNWYIRLFSLCYGAPPTDIPLLPGQIQIANDILQLEAKRCARRMSAPAVSYPDEPPSTPPPDPPRQRRASDSNRHSHPSEKDQFNLTPPGHTPSASFPPKWFFGKIPRHHAEQILKDNQRFGDLLVRASESTRGPGEFSLSVRQSSRDGHAVIRHYKLIRMLTSSGLNGYKLDIDEHHEVKNSVYELLLFFIEKSGGSLKLFETQDSSLLKMPDNLYENRFSEIFSTDPENGEHPRSPSHGSKLPMHGKGSFIRNQRAPWTPEESEYLAPDVKPDRHDDAGYVGPSHGYENTTKLKAL…	27	2.6	1	1	1	1	1	---	---	---	1	1	1	-	-	-	CL9154.Contig1_All	46.97	6e-07	gi|313225146|emb|CBY20939.1|	unnamed protein product [Oikopleura dioica]	44.44	4e-06	sp|P62993|GRB2_HUMAN	Growth factor receptor-bound protein 2 OS=Homo sapiens GN=GRB2 PE=1 SV=1	46.97	2e-06	E4WQP8	E4WQP8_OIKDI Whole genome shotgun assembly, reference scaffold set, scaffold scaffold_1 OS=Oikopleura dioica GN=GSOID_T00000948001 PE=4 SV=1	-	-	-	-	-	-	-	K08891|1|3e-06|53.5|rno:79113|proto-oncogene tyrosine-protein kinase FGR [EC:2.7.10.2]!K04364|2|4e-06|53.1|mmu:14784|growth factor receptor-binding protein 2	-	-
321	Unigene10261_All	264 1346 hypothetical protein AURANDRAFT_28607 [Aureococcus anophagefferens]	48108	LFTPGPLTTSATVKSVMLRDVGARCEEMKSNISWIRQKLLEIAGVSSDKYTCVPLQGSGSYTVEAVLNTTSKKDNARVLIIVNGRYGRRMVSMCEYMGVEVHPLFIDETEAVTGEMVRIFLQKDKNWTSVAIVHSETSSGTVNNVEEVGQLVKKECPGIFYIVDAMSSFGAIPLDMESGQIDFVVSSANKCLEGVPGFGYTICRKDILLQCKGRATSLCLDLVDQYVRLEETGHFRFTQPTHCLLAFRQAIEEFLKEGGVNGRAKRYKELHRILCDGMEQLGFKRYIPGKCQGYIITSFMSPQHENWSFETFNNRLLALGQSIYPGSTTKIKNTFRIGSIGRLFPDDMSHLIDCIKKVLCE	21	8	-	2	2	2	2	---	---	---	-	-	-	-	-	-	Unigene10261_All	54.75	7e-110	gi|260830463|ref|XP_002610180.1|	hypothetical protein BRAFLDRAFT_77063 [Branchiostoma floridae] >gi|229295544|gb|EEN66190.1| hypothetical protein BRAFLDRAFT_77063 [Branchiostoma floridae]	45.28	7e-80	sp|A6L4N0|PHNW_BACV8	2-aminoethylphosphonate--pyruvate transaminase OS=Bacteroides vulgatus (strain ATCC 8482 / DSM 1447 / NCTC 11154) GN=phnW PE=3 SV=1	54.75	3e-109	C3Y0B7	C3Y0B7_BRAFL Putative uncharacterized protein OS=Branchiostoma floridae GN=BRAFLDRAFT_77063 PE=3 SV=1	STM0431	285	9e-77	COG0075	Serine-pyruvate aminotransferase/archaeal aspartate aminotransferase	E	Amino acid transport and metabolism ;	K00830|1|3e-17|89.7|acs:100559450|alanine-glyoxylate transaminase / serine-glyoxylate transaminase / serine-pyruvate transaminase [EC:2.6.1.44 2.6.1.45 2.6.1.51]	GO:0006793//phosphorus metabolic process	GO:0036094//small molecule binding;GO:1901363//heterocyclic compound binding;GO:0008483//transaminase activity;GO:0097159//organic cyclic compound binding;GO:0016772//transferase activity, transferring phosphorus-containing groups	-
322	CL1760.Contig2_All	60 1328 hypothetical protein SELMODRAFT_74992 [Selaginella moellendorffii] >gi|302804594|ref|XP_002984049.1| hypothetical protein SELMODRAFT_180681 [Selaginella moellendorffii] >gi|300148401|gb|EFJ15061.1| hypothetical protein SELMODRAFT_180681 [	57281	DKSIWEDGEETVGEEVLRMSTDEIIGRTRLLDNEVKIMKSEMMRIQHELTAQREKIKENEEKIKVNKTLPYLVSNVIELLDVEPEDSSEAEGANVDLDSQRKGKCAVIKTSTRQTYFLPVIGLVDPEQLHPGDLVGVNKDSYLILETLPQEFDSRVKAMEVDERPTEQYSDIGGLDKQIQELIEAVVLPMTHKERFQNIGIQPPKGVLLYGPPGTGKTLLARACAAQTKSTFLKLAGPQLVQMFIGDGAKLVRDAFALAKEKLPAIIFIDELDAIGTKRFDSEKAGDREVQRTMLELLNQLDGFSSTEDIKVIAATNRVDILDPALLRSGRLDRKIEFPSPTEEARARIMQIHSRKMNVGADVNFEELARCTDDFNGAQCKAVCVEAGMIALRRGATEL…	485	18.4	-	23	12	5	4	1.065	1.03	1.027	10	11	11	-	-	-	CL1760.Contig2_All	94.8	0	gi|390333464|ref|XP_782191.3|	PREDICTED: 26S protease regulatory subunit 6A-like [Strongylocentrotus purpuratus]	87.41	0	sp|O42586|PR6AB_XENLA	26S protease regulatory subunit 6A-B OS=Xenopus laevis GN=psmc3-b PE=2 SV=1	90.66	0	C3Y895	C3Y895_BRAFL Putative uncharacterized protein OS=Branchiostoma floridae GN=BRAFLDRAFT_119205 PE=3 SV=1	YOR117w	611	9e-175	COG1222	ATP-dependent 26S proteasome regulatory subunit	O	Posttranslational modification, protein turnover, chaperones ;	K03065|1|0.0|748|nvi:100115023|26S proteasome regulatory subunit T5	GO:0030163//protein catabolic process;GO:0009987//cellular process;GO:0006508//proteolysis	GO:0004175//endopeptidase activity;GO:0016887//ATPase activity;GO:0005524//ATP binding	GO:0005737//cytoplasm;GO:0008540//proteasome regulatory particle, base subcomplex
323	CL6008.Contig2_All	125 739 minus strand glutathione S-transferase [Galdieria sulphuraria]	28325	MADKPKITYVRGRGLAEVSRLIFAVQDVETTEEHITTNEEFQKIKATGKLMFNQLPLIEIDGLCLIESQAQGNYLGHKYNMLGKTDLERGRVQMLFAGSNSFNSVSGPFWFFMPAEARADAKKSAIEKGKTRYLPVFEKVLTENGTGFLVGSEATIADCALFNILSCMKEMPEYNNILDNFPQCKAFVDTFSAIPGVKKYLESPR	418	12.7	-	20	20	3	3	1.373	1.416	1.287	17	17	17	*	*	*	CL6008.Contig2_All	45.34	2e-30	gi|390359046|ref|XP_792476.3|	PREDICTED: glutathione S-transferase alpha-4-like, partial [Strongylocentrotus purpuratus]	39.9	4e-28	sp|Q28035|GSTA1_BOVIN	Glutathione S-transferase A1 OS=Bos taurus GN=GSTA1 PE=2 SV=3	54.22	7e-18	H3IY52	H3IY52_STRPU Uncharacterized protein OS=Strongylocentrotus purpuratus GN=SPU_019154gn PE=4 SV=1	-	-	-	-	-	-	-	K00799|1|4e-38|157|spu:583081|glutathione S-transferase [EC:2.5.1.18]	-	-
324	CL5072.Contig1_All	1 2595 predicted protein [Physcomitrella patens subsp. patens] >gi|162681314|gb|EDQ67742.1| predicted protein [Physcomitrella patens subsp. patens]	116101	RTFQDMIGRSDMLKAGESLNSQKGKMLNFEKVLLNALDMRPGVNIIGGSIKQDFELEQRLDNHLIAEAQSVINGTSDSCQIKVQAGNTTRAFATTLSFEVAKKYGDEGLPDKSISIEVKGHGGQSFCAFLSRGIHVELEGDSNDYVGKGLSGGTVVIYPPKDLPDDYKSHENIIVGNVCLYGATSGKAYFRGTAAERFCVRNSGAVAIAEGIGDHGCEYMTGGVVIVLGPTGRNFAAGMSGGIAYVFNKSGKFESLCNKEMVTLEPVVKDIDVSFLQEHLKEFISYTGSEVAKAIHTNWQDNVKYFVKVFPNEYRRALRTLRDEEMVKETQKRAAKKPLTNGVIGGHTTNGPTSPAAKKSKKEPVVQDIESTIPDTELEQKIIDKALDKTRGFMKYHRQ…	62	2.9	-	3	3	2	2	1.152	---	1.35	2	1	2	-	-	-	CL5072.Contig1_All	78.16	2e-81	gi|390348197|ref|XP_797208.3|	PREDICTED: uncharacterized protein LOC592601 [Strongylocentrotus purpuratus]	52.07	5e-111	sp|P96219|GLTD_MYCTU		63.15	0	C3XUM8	C3XUM8_BRAFL Putative uncharacterized protein OS=Branchiostoma floridae GN=BRAFLDRAFT_129259 PE=4 SV=1	SPAPB1E7.07_4	572	1e-162	COG0493	NADPH-dependent glutamate synthase beta chain and related oxidoreductases	ER	Amino acid transport and metabolism ; General function prediction only ;	K00264|1|0.0|1105|bfo:BRAFLDRAFT_129259|glutamate synthase (NADPH/NADH) [EC:1.4.1.13 1.4.1.14]	GO:0008152//metabolic process	GO:0050662//coenzyme binding;GO:0004355//glutamate synthase (NADPH) activity;GO:0000166//nucleotide binding	-
325	Unigene18881_All	171 1196 PREDICTED: uncharacterized oxidoreductase YajO-like [Cucumis sativus]	45902	YRYLGGSGVKVSNICLGAMTFGQTGLPGNCDEAASHKILDRFVELGGNFIDTANIYGRGASETIVGNWLSRQERHKIVLASKVRMQMEDDNPNSGGLSRKSIMWSVEESLKRLKTDYIDLFQIHCWDWGTPLEETLRTLDDLVRAGKVRYIGGSNVSSWQFQKIIDYNKFHGLNKWITLQTQYSLLVRDPETEFTDVCKIEGLGLLPWSPLKGGWLSGKIKKGDKAAPEGSRVAWSEAMGDKVRYQSCPKFTPYANEGSIWDLLDKMTEIGKANGKSVAQVALRWLLQKEAVSSVIIGCKTVEQLEDNMGAGAGWELSTEQMSTLDNASAVEPLQVAAMIDR	280	20.8	-	16	16	6	6	0.469	0.538	0.946	12	11	11	*	*	-	Unigene18881_All	68.49	7e-21	gi|260819834|ref|XP_002605241.1|	hypothetical protein BRAFLDRAFT_126594 [Branchiostoma floridae] >gi|229290572|gb|EEN61251.1| hypothetical protein BRAFLDRAFT_126594 [Branchiostoma floridae]	39.01	8e-48	sp|O05408|YRPG_BACSU	Uncharacterized oxidoreductase YrpG OS=Bacillus subtilis (strain 168) GN=yrpG PE=3 SV=2	67.01	3e-73	H3HZ78	H3HZ78_STRPU Uncharacterized protein OS=Strongylocentrotus purpuratus GN=SPU_007033gn PE=4 SV=1	mll8386	251	1e-66	COG0667	Predicted oxidoreductases (related to aryl-alcohol dehydrogenases)	C	Energy production and conversion ;	K04882|1|1e-29|130|mdo:100012202|potassium voltage-gated channel Shaker-related subfamily A, beta member 1!K15303|3|2e-28|127|gga:419471|aflatoxin B1 aldehyde reductase!K04883|5|2e-28|126|rno:29738|potassium voltage-gated channel Shaker-related subfamily A, beta member 2	-	-
326	Unigene413_All	263 730 LEN=1458; minus strand; translated	22356	IARLCRSRAPSIYQVWKPTLQKTPFALYSSTSKKVEQSEYVIGKQTEIDPKRVQEIIDEGKRSYDEQNDINSPYYLTWGFDKNNFIDLWSKRFILFFGVSVVLVLGPVYYHYLPDNKNIKWNRAEALRVLQERREAGLPLIDPDFVPRDKIVLPDE	95	9.6	1	6	6	1	1	1.038	1.2	0.997	6	6	6	-	-	-	Unigene413_All	52.14	5e-28	gi|72115861|ref|XP_787762.1|	PREDICTED: NADH dehydrogenase [ubiquinone] 1 beta subcomplex subunit 11, mitochondrial-like [Strongylocentrotus purpuratus]	-	-	-	-	52.14	2e-27	H3HKD8	H3HKD8_STRPU Uncharacterized protein OS=Strongylocentrotus purpuratus GN=SPU_002106gn PE=4 SV=1	-	-	-	-	-	-	-	K11351|1|7e-29|125|spu:582727|NADH dehydrogenase (ubiquinone) 1 beta subcomplex 11 [EC:1.6.5.3 1.6.99.3]	-	-
327	Unigene28880_All	1795 3828 minus strand hypothetical protein THAPSDRAFT_263945 [Thalassiosira pseudonana CCMP1335] >gi|220971397|gb|EED89732.1| hypothetical protein THAPSDRAFT_263945 [Thalassiosira pseudonana CCMP1335]	89969	AQPGELIGEIAVLTGEPWLFTVKAKVDSTIISITKKSVYSLIRKKPWVVLKLGHLVVNKLSPFVRQTDFALDWMQVEAGKSVYRQGDPADCIYIVLNGRLRSVVQLPSGKKDLVAEYGRDDIVGVVEVLTKKERVTSVHAIRDTEVAKLPSGMLNLIKRKYPHTVSRLIQILSERLIGQVQEKIGTTSQERHPTVENLSTVAVVAISDKVPVSRFTLELTHGLSTIGSVLRLTGNDILNALGGSALDTVNEYRLTSWLGQQEDLHRIVLYEANKDMTAWTQRCIRQADCILIVGLADSDPTILGEMEKQLESLDVRAQKELILLHKARRDGRYRPPTRTADWLNARSWCVSHHHIRCPERMFRRKNPAKERETYDKLFAGNRKQAPDFARLARFLTGTS…	25	1.3	-	1	1	1	1	---	---	---	1	1	1	-	-	-	Unigene28880_All	68.04	0	gi|390333628|ref|XP_783891.3|	PREDICTED: patatin-like phospholipase domain-containing protein 7-like [Strongylocentrotus purpuratus]	57.64	0	sp|Q6ZV29|PLPL7_HUMAN	Patatin-like phospholipase domain-containing protein 7 OS=Homo sapiens GN=PNPLA7 PE=2 SV=3	72.66	2e-52	H3IAS0	H3IAS0_STRPU Uncharacterized protein OS=Strongylocentrotus purpuratus GN=SPU_011154gn PE=4 SV=1	YML059c_2	286	1e-76	COG1752	Predicted esterase of the alpha-beta hydrolase superfamily	R	General function prediction only ;	K14676|1|0.0|949|spu:578640|lysophospholipid hydrolase [EC:3.1.1.5]	GO:0006629//lipid metabolic process;GO:0001525//angiogenesis;GO:0009887//organ morphogenesis	GO:0004091//carboxylesterase activity	GO:0043231//intracellular membrane-bounded organelle;GO:0031967//organelle envelope;GO:0044444//cytoplasmic part;GO:0031090//organelle membrane
328	Unigene8254_All	731 1639 LEN=2717; translated	43524	VRYGRSFIWELGSTQGARDFLLPSLRYNMFTLHTTYNRKAMDTLMVPDAKYITSVRDPVEQFESAFVYYKFFLALPERFQEANIQTAAKIEEWLRLSQFYTARYERIVKNGDVKTPNSELYCHNSQMRDLGLDMKNQEVKETVLKHISTLEQQFNFFVITEYFDESLIVLMREFCWNMEDILYIPENQRPDQIRTTSLPEHLRQAIREWNSADQLLYEQVNRTLWRKIADYGDGFQSDLEMFRQNLKMVLKNCVKEKQDKLDFSRVKYVMKKNSPEYCKLMTVTKNQLMEKIRKRQELTESVA	20	2.3	-	1	1	1	1	---	---	---	-	-	-	-	-	-	Unigene8254_All	39.83	6e-35	gi|115893448|ref|XP_001198811.1|	PREDICTED: galactosylceramide sulfotransferase-like [Strongylocentrotus purpuratus]	31.02	5e-18	sp|Q0VCH4|G3ST3_BOVIN	Galactose-3-O-sulfotransferase 3 OS=Bos taurus GN=GAL3ST3 PE=2 SV=1	40.61	2e-29	H3HFG6	H3HFG6_STRPU Uncharacterized protein OS=Strongylocentrotus purpuratus GN=SPU_000347gn PE=4 SV=1	-	-	-	-	-	-	-	K11793|1|5e-34|145|spu:578218|cereblon!K09676|2|1e-26|120|mmu:545276|galactose-3-O-sulfotransferase 3 [EC:2.8.2.-]!K01019|4|7e-25|114|xtr:100495120|galactosylceramide sulfotransferase [EC:2.8.2.11]	-	-
329	Unigene4403_All	277 1521 minus strand predicted protein [Physcomitrella patens subsp. patens] >gi|162695832|gb|EDQ82174.1| predicted protein [Physcomitrella patens subsp. patens]	61259	FLLLTDTFDSVTIDVCDQVFKFVEEKVSIWKSPQFYVSGKNFLLRMSNDLLRRLSKAHNTVFCGRIQLFLAKFFPLDEKSGLNLMSNFNKENVTFYNKENLEGPIQIEEKDDSMEYEEGEMSEGPSSHHIDYQLYRKFWSLQDYFRDPVQCYTKDKWKQFMKNTRSVLAAFSSMKLEPDSMSSSSMTKGKEPMTTKQKPTVQDKSSVFFAKYLTSEKLFDLQLSDSSFRRYVLVQFLILFQYLSQQVKFKTATLVLTEEMQLFMKTTLDKVYELLKETPPDGQKFAADIKHILDREEHWNNWKNEGCPSFVKEKPKEESEPKRRPRKRTLGEELELNPTSEKVDMGSPELTRLWNQSSNNLEACRSEKRMYLPSLETFFEEAIEQADPEAMIEDDFKVV…	34	2.4	-	1	1	1	1	---	---	---	1	1	1	-	-	-	Unigene4403_All	75.56	2e-13	gi|37779809|gb|AAP23263.1|	THO complex 1 [Pan troglodytes]	57.89	8e-20	sp|P59924|THOC1_RAT	THO complex subunit 1 OS=Rattus norvegicus GN=Thoc1 PE=2 SV=1	74.47	4e-13	Q6TUH4	Q6TUH4_RAT LRRGT00070 OS=Rattus norvegicus GN=Thoc1 PE=2 SV=1	-	-	-	-	-	-	-	K12878|1|4e-123|441|mcc:697954|THO complex subunit 1	-	-
330	CL1437.Contig3_All	1 3612 LEN=4808; minus strand; translated	151318	ALNAANAYKDIVSAIEEAEKAALAAKNASTLAEEAASGFGNKPQKSLKISNKLVKKGEKTNKTLGALEAELNASMDAVRQARDKNNGVEYDLSEIERGMRAIPSEESDCEIKVCALDNDACKPGFTGANCNVAAFSDQALDATMQAMDASMRAEAAAGMVGGIIDQLPMLEELVTTRIPEGVMEANRNIDEIQPQNRKSRKFLDKIPGLAQSLTDTHEMFVNISSNVLGNLDYLREQIDNARSLAQGIQIAAKLESDSSVQLRSLQLSDGPQSVNSISMYFTTTKPDALLFFAGGPGASEEYLALEIEKSEIKLKYNLGDVDVEVPLAMNVADGQWHQVVVERVGKKGRLIVYSDFEGAPMVENEGTSQGENSLLHWGEGWGIFVGGIGENFTAPGVVN…	469	10	-	24	24	10	10	0.908	0.703	0.839	20	18	20	-	*	*	CL1437.Contig3_All	36.4	7e-169	gi|390352866|ref|XP_795348.3|	PREDICTED: laminin alpha chain, partial [Strongylocentrotus purpuratus]	34.91	1e-08	sp|P31696|AGRIN_CHICK	Agrin OS=Gallus gallus GN=AGRN PE=1 SV=2	37.63	2e-113	H3J3S3	H3J3S3_STRPU Uncharacterized protein OS=Strongylocentrotus purpuratus GN=SPU_021165gn PE=4 SV=1	-	-	-	-	-	-	-	K06240|1|7e-92|340|isc:IscW_ISCW011485|laminin, alpha 3/5!K05637|4|9e-86|319|aml:100484712|laminin, alpha 1/2	-	-
331	Unigene61085_All	1 384 LEN=384; translated	18096	XEKFEFLEDLDLSNFHYVYRFACGLDPQVAKQLIEYIKATDGGDKYATLCILERNGSVEHIKDMIQNLCSRTVHIAHEDSRLIQRSIQQLLDIVYAMKPQIKVTKLLLHESFRGIDVDKCEIIVTSGLX	26	5.4	-	1	1	1	1	---	---	---	1	1	1	-	-	-	Unigene61085_All	-	-	-	-	-	-	-	-	-	-	-	-	-	-	-	-	-	-	-	-	-	-
332	CL9728.Contig1_All	178 1158 minus strand Cr611 [Catharanthus roseus]	42957	IRVVVSGAAGQIAYALLYSIAKGDVFGSDQRLDLVLLDIPQMLPILDGVIMELQDCSLPLVNSLTPTADADEAFKGADAAMLVGAMPRKPGMERKDLLKANCRIFQAQGKAMDQFAKKTIKVLVVGNPANTNCLIAQRSAPSIPKENFTCLTRLDQNRAQAQIADRLGLPTNKVCDVTIWGNHSTTQYPDALHAKAEIDGVSTPVFAAVKDDAWLTGPFIETVQKRGAAVLAARKLSSAMSAAKAICDHMRDWWFGTQGDKWVSMGVSSDGNTYGIPEGLIYSFPVCIQNKQWTIVQGLEINDFSRKKMDTSAKELAEEKDMAMDFL	922	25.1	-	50	50	6	6	0.877	0.862	0.937	48	48	49	-	*	-	CL9728.Contig1_All	69.72	2e-133	gi|14583129|gb|AAK69765.1|AF390559_1	cytosolic malate dehydrogenase thermostable form [Sphyraena idiastes]	67.58	5e-128	sp|Q5ZME2|MDHC_CHICK	Malate dehydrogenase, cytoplasmic OS=Gallus gallus GN=MDH1 PE=2 SV=1	69.72	2e-134	H3CAM1	H3CAM1_TETNG Malate dehydrogenase OS=Tetraodon nigroviridis GN=MDH1 (1 of 2) PE=3 SV=1	DR0325	328	6e-90	COG0039	Malate/lactate dehydrogenases	C	Energy production and conversion ;	K00025|1|5e-131|467|dre:335715|malate dehydrogenase [EC:1.1.1.37]	GO:0006107//oxaloacetate metabolic process;GO:0006734//NADH metabolic process;GO:0006108//malate metabolic process;GO:0006099//tricarboxylic acid cycle;GO:0044262//cellular carbohydrate metabolic process;GO:0006094//gluconeogenesis	GO:0051287//NAD binding;GO:0030060//L-malate dehydrogenase activity;GO:0004470//malic enzyme activity;GO:0047860//diiodophenylpyruvate reductase activity	GO:0005829//cytosol;GO:0005739//mitochondrion;GO:0005813//centrosome
333	Unigene27722_All	2 553 enoyl-Coenzyme A hydratase/3-hydroxyacyl Coenzyme A dehydrogenase [Ectocarpus siliculosus]	25636	GFAMGAFKVGDLAGNDVGYKGRKDFGFITREGQEDRFRQGYRYCPIADFLVERGRLGQKSGKGWYNYGKPGGRVPQPDPEVEKLIIESSEKAGFKRRRISPQEILERCLYSLINEGFKTLEENIASRQEDIDMIWLYGYGWPRHTGGPMYYAKNFVGLDKIYERILYYQALNPDVKHWEPSNLL	348	40.8	-	19	19	7	7	0.683	0.947	0.712	16	16	14	*	-	*	Unigene27722_All	64.04	9e-27	gi|390364222|ref|XP_001183011.2|	PREDICTED: peroxisomal bifunctional enzyme-like [Strongylocentrotus purpuratus]	53.48	1e-51	sp|Q9DBM2|ECHP_MOUSE	Peroxisomal bifunctional enzyme OS=Mus musculus GN=Ehhadh PE=1 SV=4	54.26	2e-54	C3ZC82	C3ZC82_BRAFL Putative uncharacterized protein (Fragment) OS=Branchiostoma floridae GN=BRAFLDRAFT_214740 PE=4 SV=1	RSc1759_2	150	1e-36	COG1250	3-hydroxyacyl-CoA dehydrogenase	I	Lipid transport and metabolism ;	K07514|1|6e-53|206|bfo:BRAFLDRAFT_220780|enoyl-CoA hydratase / 3-hydroxyacyl-CoA dehydrogenase / 3,2-trans-enoyl-CoA isomerase [EC:4.2.1.17 1.1.1.35 5.3.3.8]	GO:0006637//acyl-CoA metabolic process;GO:0006635//fatty acid beta-oxidation	GO:0019899//enzyme binding;GO:0003857//3-hydroxyacyl-CoA dehydrogenase activity	GO:0005829//cytosol;GO:0005777//peroxisome;GO:0005739//mitochondrion;GO:0005634//nucleus
334	CL5732.Contig1_All	558 2612 minus strand hypothetical protein SELMODRAFT_73556 [Selaginella moellendorffii] >gi|300171032|gb|EFJ37632.1| hypothetical protein SELMODRAFT_73556 [Selaginella moellendorffii]	86168	LDEINPENIRENLRQLTKKPHLAGTEADKEMADYVKSVWDTQGMETTRIVPYDVLLSYPDPEKPNLITILNSDGTDYFQSQPEESKLDEGDKHNDTVFPFNAYAPAGVVEGELVYVNYARAEDFKQLEDLGVNASGKVVIARYGKIFRGDKENQAWLRGAKGLILYSDPADYAIEGSSSVYPDSWYMPPSGIQRGTVFRPMGDPLTPGYPATETAFREKYEDSELPNIPVQPIGYGDAIHILREMAGDAAPDEWSGGLNVTYKLGPGLVNNRNIKLDVNNRLQRNTTYNIIGTITGSLEPDRYVMIGNHHDAWVFGAVDPSSGTAVLLELSRVMTKLVMEGKWRPRRTIVFCSWGAEEYGLIGSTEWVEEFTRPLVERAVAYINIDIAVQGNFTFRGKA…	155	3.8	-	9	9	2	2	0.45	0.619	0.656	8	8	7	*	-	*	CL5732.Contig1_All	59.33	0	gi|390332915|ref|XP_003723594.1|	PREDICTED: N-acetylated-alpha-linked acidic dipeptidase 2-like isoform 1 [Strongylocentrotus purpuratus]	46.25	4e-172	sp|Q04609|FOLH1_HUMAN	Glutamate carboxypeptidase 2 OS=Homo sapiens GN=FOLH1 PE=1 SV=1	55.63	0	H3JQ30	H3JQ30_STRPU Uncharacterized protein OS=Strongylocentrotus purpuratus GN=SPU_028736gn PE=4 SV=1	MK0503	64.3	7e-10	COG2234	Predicted aminopeptidases	R	General function prediction only ;	K01301|1|0.0|754|spu:579656|glutamate carboxypeptidase II [EC:3.4.17.21]!K14592|3|2e-173|610|pon:100453848|folate hydrolase 1 [EC:3.4.17.21]	-	-
335	Unigene8643_All	99 728 hypothetical protein GUITHDRAFT_77433 [Guillardia theta CCMP2712]	27815	ILGATGRSGVHLVEQALEEGHEVVAIVRTPSKVTTEHENLKVVSGDITSTASLKEHFEGCDAVVSCLGAGTLRNVTLYSESIKIIVAAMRETSIKKLVAMTSWGSFSDPNDRGPFLIEWILRPLVLKNVLENMAVMETYLKEEAQDLDFTTVRPPGLKDGPKTDLEIAHEERNFVGGTATTMLRADVARFLLQCLKTDEFNKKWIAIGVK	131	18.1	-	5	5	3	3	1.182	0.682	1.069	4	4	4	-	*	-	Unigene8643_All	50	6e-50	gi|291225227|ref|XP_002732603.1|	PREDICTED: Flavin reductase-like [Saccoglossus kowalevskii]	31.86	1e-16	sp|P30043|BLVRB_HUMAN	Flavin reductase (NADPH) OS=Homo sapiens GN=BLVRB PE=1 SV=3	50.25	8e-47	H3IGX0	H3IGX0_STRPU Uncharacterized protein OS=Strongylocentrotus purpuratus GN=SPU_013348gn PE=4 SV=1	XF1747	58.5	8e-09	COG0702	Predicted nucleoside-diphosphate-sugar epimerases	MG	Cell wall/membrane/envelope biogenesis ; Carbohydrate transport and metabolism ;	K05901|1|4e-20|98.2|cin:100185152|biliverdin reductase / flavin reductase [EC:1.3.1.24 1.5.1.30]	-	-
336	CL12796.Contig2_All	59 313 hypothetical protein CHLREDRAFT_112949 [Chlamydomonas reinhardtii] >gi|158281256|gb|EDP07011.1| predicted protein, partial [Chlamydomonas reinhardtii]	12820	SFSELAKTMDSGQKRRFGYFQCGKCNKSWESAFSWEGKYQECKKCHANVYPHNLRPLEYSGVDGNSNAPHPQELCEMCKELGTSC	21	9.4	-	1	1	1	1	---	---	---	-	-	-	-	-	-	CL12796.Contig2_All	56.1	7e-06	gi|335307007|ref|XP_003360668.1|	PREDICTED: hypothetical protein LOC100621092 [Sus scrofa]	52.63	4e-14	sp|Q8N2G6|ZCH24_HUMAN	Zinc finger CCHC domain-containing protein 24 OS=Homo sapiens GN=ZCCHC24 PE=1 SV=1	52.7	2e-11	F7D1P2	F7D1P2_MACMU Uncharacterized protein (Fragment) OS=Macaca mulatta GN=ZCCHC24 PE=4 SV=1	-	-	-	-	-	-	-	-	-	-
337	Unigene22951_All	84 959 minus strand RecName: Full=60S ribosomal protein L5 >gi|3153904|gb|AAC17448.1| RPL5A-related protein [Helianthus annuus]	43514	MGFVKVVKNKAYFKRFQVKFKRRRQGKTDYHARRFLVVQDKNKYNTPKYRMIVRFTNKDCICQVAYARIEGDVIVCAAYAHELPRYGVKVGLTNYAAAYCTGLLLARRLLKKFKLDGVYEGVSEADGEEYHVESEGGQPGAFRCYLDVGLARTSTGARVFGALKGAADGGLDIPHSTKRFPGYDEEENSYDAETHKKYIFGGHVADYMRHLQEEDDDAYKRQFSQFIKNGITADSLEGIYKNAHSAIRADPEHKPKPEKKVTVKRWNRAKLTLSQRQDRVRQKKESYLKSLQ	558	42.8	-	36	36	13	13	0.816	1.041	0.983	19	19	19	-	-	-	Unigene22951_All	80	2e-57	gi|405971461|gb|EKC36296.1|	60S ribosomal protein L5 [Crassostrea gigas]	87.25	2e-38	sp|Q95276|RL5_PIG	60S ribosomal protein L5 (Fragment) OS=Sus scrofa GN=RPL5 PE=2 SV=3	79.43	9e-71	F0J8U8	F0J8U8_AMBVA 60S ribosomal protein L5 (Fragment) OS=Amblyomma variegatum PE=2 SV=1	SPBC11C11.09c	301	1e-81	COG0256	Ribosomal protein L18	J	Translation, ribosomal structure and biogenesis ;	K02932|1|5e-110|397|spu:758293|large subunit ribosomal protein L5e	-	-
338	Unigene12150_All	129 623 minus strand DAO-domain-containing protein [Coccomyxa subellipsoidea C-169]	20980	ARLRRLLVGGALVGVTAVTTGYFFSLRNKDRLSKSRQAHVISADFRSSPLPSRAQQIQTLQSTLEYDVLVIGGGATGCGVALDAVSRGLKTALVEKYDFSSGTSSRSTKLVHGGVRYLQKAIMGFDYEQYKLVREALHERANLLEIAPHLSYPLPIMLPVYKLWQ	29	6.1	-	1	1	1	1	---	---	---	-	1	1	-	-	-	Unigene12150_All	85.29	1e-10	gi|149047794|gb|EDM00410.1|	glycerol-3-phosphate dehydrogenase 2, mitochondrial, isoform CRA_a [Rattus norvegicus] >gi|149047795|gb|EDM00411.1| glycerol-3-phosphate dehydrogenase 2, mitochondrial, isoform CRA_a [Rattus norvegicus]	80	4e-50	sp|A7DZP8|GPDM_MESAU	Glycerol-3-phosphate dehydrogenase, mitochondrial OS=Mesocricetus auratus GN=GPD2 PE=1 SV=1	85.9	7e-33	F6V3P2	F6V3P2_CALJA Uncharacterized protein (Fragment) OS=Callithrix jacchus GN=GPD2 PE=3 SV=1	ECU10g0870	129	1e-30	COG0578	Glycerol-3-phosphate dehydrogenase	C	Energy production and conversion ;	K00111|1|7e-63|239|spu:576660|glycerol-3-phosphate dehydrogenase [EC:1.1.5.3]	GO:0055114//oxidation-reduction process;GO:0006734//NADH metabolic process;GO:0019563//glycerol catabolic process;GO:0006072//glycerol-3-phosphate metabolic process;GO:0006094//gluconeogenesis;GO:0044255//cellular lipid metabolic process	GO:0005509//calcium ion binding;GO:0004367//glycerol-3-phosphate dehydrogenase [NAD+] activity;GO:0052591//sn-glycerol-3-phosphate:ubiquinone-8 oxidoreductase activity	GO:0009331//glycerol-3-phosphate dehydrogenase complex;GO:0005743//mitochondrial inner membrane
339	CL4507.Contig1_All	283 612 vacuolar ATP synthase, partial [Coccomyxa subellipsoidea C-169] >CL4507.Contig2_All 212 541 minus strand vacuolar ATP synthase, partial [Coccomyxa subellipsoidea C-169]	14838	LVAVIGDEDTCTGFLLGGIGEMNKARKPNFMVVEKDTSVHDIEERFNAFLNRSDIAIILINQNYAELIRHAIDNHSKPIPAILEIPSKDCPYDPNKDSILRRAKGMFSAE	29	11.8	-	1	1	1	1	---	---	---	1	1	1	-	-	-	CL4507.Contig1_All	79.01	9e-32	gi|291226360|ref|XP_002733161.1|	PREDICTED: vacuolar H[+] ATPase 14kD subunit-like, partial [Saccoglossus kowalevskii]	74.77	1e-41	sp|Q9I8H3|VATF_XENLA	V-type proton ATPase subunit F (Fragment) OS=Xenopus laevis GN=atp6s14 PE=3 SV=1	78.7	2e-44	C3XSJ8	C3XSJ8_BRAFL V-type proton ATPase subunit F OS=Branchiostoma floridae GN=BRAFLDRAFT_115527 PE=3 SV=1	SPBC3B9.18c	115	2e-26	COG1436	Archaeal/vacuolar-type H+-ATPase subunit F	C	Energy production and conversion ;	K02151|1|4e-46|182|bfo:BRAFLDRAFT_115527|V-type H+-transporting ATPase subunit F [EC:3.6.3.14]	GO:0015991//ATP hydrolysis coupled proton transport;GO:0060041//retina development in camera-type eye	GO:0046961//proton-transporting ATPase activity, rotational mechanism;GO:0046933//proton-transporting ATP synthase activity, rotational mechanism	GO:0033180//proton-transporting V-type ATPase, V1 domain
340	Unigene11782_All	108 1340 predicted protein [Physcomitrella patens subsp. patens] >gi|162667464|gb|EDQ54093.1| predicted protein [Physcomitrella patens subsp. patens]	54961	RLQARFFTAQKKYSVADTPFSVPANIVVSDLSDLINKLLLQDKTEQEHKQVDFDFLINGEFLRLSLGEHLEEKGVSTETVVDIEYVEKFPSPKPVGSVLHDDWISTVRGHSGRILTGCYDNHVRLWNKDGSAIATLEYHSEPVKSVAWIKNEEDRSLFASGSHDQTLLLWEWKEDSNTHRCLYCCRGHSRSVDSLAVDSSGSRICSASFDKTIKIWSTEIEDNPSEESEQERKKVKTENPKPATRTPLITLEGHKEAVSSVLWIGENEVCSASWDHTMNIWDVTTATHTSSLTGTKAFLSISYSPLSKLLASGSVDRHVRLWDPREKSGSVVHSSLTHHAGWVSSVAWSPDNQHQLLSGGYDKQIKMWDIRSPKAPLFDMSGIKDKVLAVDWSIAELLL…	26	2.4	-	1	1	1	1	---	---	---	1	1	1	-	-	-	Unigene11782_All	62.95	6e-147	gi|390350684|ref|XP_796128.3|	PREDICTED: ribosome biogenesis protein WDR12-like [Strongylocentrotus purpuratus]	54.48	3e-116	sp|Q9GZL7|WDR12_HUMAN	Ribosome biogenesis protein WDR12 OS=Homo sapiens GN=WDR12 PE=1 SV=2	64.48	2e-87	H3I5Z4	H3I5Z4_STRPU Uncharacterized protein OS=Strongylocentrotus purpuratus GN=SPU_009453gn PE=4 SV=1	all0438_2	117	4e-26	COG2319	FOG: WD40 repeat	R	General function prediction only ;	K14863|1|4e-148|525|spu:591474|ribosome biogenesis protein YTM1	GO:0007219//Notch signaling pathway;GO:0000463//maturation of LSU-rRNA from tricistronic rRNA transcript (SSU-rRNA, 5.8S rRNA, LSU-rRNA);GO:0008283//cell proliferation;GO:0000466//maturation of 5.8S rRNA from tricistronic rRNA transcript (SSU-rRNA, 5.8S rRNA, LSU-rRNA)	GO:0005515//protein binding	GO:0070545//PeBoW complex;GO:0030687//preribosome, large subunit precursor;GO:0005654//nucleoplasm
341	Unigene5487_All	171 746 minus strand Rac1 [Pfiesteria piscicida]	26120	MQAIKCVVVGDGAVGKTCLLISYTTNAFPGEYIPTVFDNYSANVMVDGRPVNLGLWDTAGQEDYDRLRPLSYPQTDVFLICFSLVSPASYENVRTKWYPEVSHHCPSTPIILVGTKLDLRDDKETMNKLSERSLRPIAYPQGLQMQKEIHAVKYLECSALTQKGLKTVFDEAIRAVLCPPAKNKSKRSCQLL	266	22.9	-	16	8	4	2	0.677	1.08	0.95	7	7	7	*	-	-	Unigene5487_All	90.96	8e-93	gi|260817467|ref|XP_002603608.1|	hypothetical protein BRAFLDRAFT_126918 [Branchiostoma floridae] >gi|229288928|gb|EEN59619.1| hypothetical protein BRAFLDRAFT_126918 [Branchiostoma floridae]	88.02	5e-98	sp|P63001|RAC1_MOUSE	Ras-related C3 botulinum toxin substrate 1 OS=Mus musculus GN=Rac1 PE=1 SV=1	90.96	2e-92	C3YJC1	C3YJC1_BRAFL Putative uncharacterized protein OS=Branchiostoma floridae GN=BRAFLDRAFT_126918 PE=3 SV=1	SPAC110.03	276	1e-74	COG1100	GTPase SAR1 and related small G proteins	R	General function prediction only ;	K04392|1|3e-98|357|xla:734382|Ras-related C3 botulinum toxin substrate 1	GO:0006954//inflammatory response;GO:0016032//viral reproduction;GO:0030334//regulation of cell migration;GO:0030838//positive regulation of actin filament polymerization;GO:0048813//dendrite morphogenesis;GO:0048261//negative regulation of receptor-mediated endocytosis;GO:0007160//cell-matrix adhesion;GO:0007411//axon guidance;GO:0043652//engulfment of apoptotic cell;GO:0097178//ruffle assembly;…	GO:0005525//GTP binding;GO:0017137//Rab GTPase binding;GO:0031996//thioesterase binding;GO:0030742//GTP-dependent protein binding;GO:0019901//protein kinase binding;GO:0003924//GTPase activity	GO:0019897//extrinsic to plasma membrane;GO:0030027//lamellipodium;GO:0005829//cytosol;GO:0001891//phagocytic cup;GO:0000139//Golgi membrane;GO:0042470//melanosome;GO:0032587//ruffle membrane
342	Unigene394_All	344 1201 protein kinase, putative [Phytophthora infestans T30-4] >gi|262099574|gb|EEY57626.1| protein kinase, putative [Phytophthora infestans T30-4]	42192	DPEQLFTKFERIGKGSFGEVFKGINNTSKEVVAIKIIDLEEAEDEIEDIQQEITVLSQCDSPYVTKYHGSYLKHTKLWIIMEYLGGGSALDLLKAGAIEEIYIATILREILKGLEYLHSEKKLHRDVKAANVLLSENGEVKLADFGVAGQLTETQMKRNTFVGTPFWMAPEVIKQSEYDSKADIWSLGITAIELAKGEPPNSDLHPMRVLFLIPKNNPPTLEGHYSKPFKEFVECCLNKDPKFRPTARELLKHKFIKTAKKTSYLQELIEVYKKWRQEADDSDEDD	60	2.4	-	5	5	1	1	2.873	0.702	0.522	4	4	4	*	-	*	Unigene394_All	88.38	4e-110	gi|95768823|gb|ABF57385.1|	serine/threonine kinase 25 [Bos taurus]	85.3	4e-125	sp|Q99KH8|STK24_MOUSE	Serine/threonine-protein kinase 24 OS=Mus musculus GN=Stk24 PE=1 SV=1	88.38	1e-109	Q1JPC4	Q1JPC4_BOVIN Serine/threonine kinase 25 (Fragment) OS=Bos taurus GN=STK25 PE=2 SV=1	YAR019c	175	6e-44	COG0515	Serine/threonine protein kinase	RTKL	General function prediction only ; Signal transduction mechanisms ; Transcription ; Replication, recombination and repair ;	K08839|1|2e-127|455|tgu:100217622|serine/threonine kinase 25 [EC:2.7.11.22]	GO:0048514//blood vessel morphogenesis;GO:0006468//protein phosphorylation;GO:0007163//establishment or maintenance of cell polarity;GO:0007507//heart development;GO:0051645//Golgi localization;GO:0050772//positive regulation of axonogenesis	GO:0004674//protein serine/threonine kinase activity;GO:0046872//metal ion binding;GO:0005524//ATP binding;GO:0005515//protein binding	GO:0005794//Golgi apparatus
343	Unigene32260_All	1 704 LEN=704; translated	29141	GKNIQATATCGEGFSFPGERYCKLTGNTADVFRPGEQEIIQGQYCDYCEPNNLVKAHPIQHAIDGTEKWWQSPPLSRLGTGIDFNHVNVTIDLGQLYHIAYIIIKSANSPRPGQWILERSRDYGDTYEAWQYFAESESECQEIFGMESITDIVNDDDVICTSDYSDIVPLEDGEIVVSLVNDRPGADNFSYSETLQEWTKATNIRLRLLRTNTLLGHLMGLARQDPTVTRRYYYX	206	9.4	-	11	11	2	2	0.594	0.613	0.828	8	9	8	*	*	-	Unigene32260_All	71.73	9e-88	gi|390353609|ref|XP_783877.3|	PREDICTED: laminin subunit alpha-like [Strongylocentrotus purpuratus]	62.5	2e-73	sp|Q61001|LAMA5_MOUSE	Laminin subunit alpha-5 OS=Mus musculus GN=Lama5 PE=1 SV=4	72.14	2e-44	H3AL54	H3AL54_LATCH Uncharacterized protein (Fragment) OS=Latimeria chalumnae GN=LAMA5 PE=4 SV=1	-	-	-	-	-	-	-	K06240|1|1e-88|325|spu:578626|laminin, alpha 3/5	GO:0007155//cell adhesion;GO:0000902//cell morphogenesis;GO:0061138//morphogenesis of a branching epithelium;GO:0048468//cell development;GO:0009790//embryo development;GO:0048754//branching morphogenesis of an epithelial tube;GO:0009887//organ morphogenesis;GO:0050794//regulation of cellular process;GO:0016477//cell migration	GO:0005102//receptor binding	GO:0005610//laminin-5 complex
344	Unigene206_All	207 1199 minus strand hypothetical protein VOLCADRAFT_108271 [Volvox carteri f. nagariensis] >gi|300255946|gb|EFJ40226.1| hypothetical protein VOLCADRAFT_108271 [Volvox carteri f. nagariensis]	46088	LLGAVVQNGSKDEIQVSSFSGEGKVIGLYFSAHWCPPCRAFTPKLADFYKNFKQSPRGDELEIVFVSSDKTQTDFDTYFGDMPWLALPFEKRDVKNSLSTKFKIQGIPTFVLLDGATGSIITSDGRSSVLEDPKGENFPWKPKPFSEVIKGKLLKNTGEECTDEALKGKVLGIYFSAHWCPPCKGFTPRLVDFYNKVNEAGKNFEIVFSSGDRNEASFKEYFATMPWLALPFQDQRAKQLSAIFEVSGIPMLIIIDEDGKVITSQGRAAVTSDKEGKDFPWKPKPVELLTEMNVKTVNSEPCLVFFAELNEGEEDANALAAAAVMQPVAEA	24	2.1	-	1	1	1	1	---	---	---	-	-	-	-	-	-	Unigene206_All	55.23	2e-105	gi|291243820|ref|XP_002741798.1|	PREDICTED: predicted protein-like [Saccoglossus kowalevskii]	48.87	5e-28	sp|O77404|TYPX_TRYBB	Tryparedoxin OS=Trypanosoma brucei brucei PE=1 SV=1	59.09	1e-31	F0XYB4	F0XYB4_AURAN Putative uncharacterized protein (Fragment) OS=Aureococcus anophagefferens GN=AURANDRAFT_16440 PE=4 SV=1	-	-	-	-	-	-	-	-	GO:0055114//oxidation-reduction process;GO:0072358//cardiovascular system development;GO:0030178//negative regulation of Wnt receptor signaling pathway;GO:0031397//negative regulation of protein ubiquitination	GO:0005515//protein binding;GO:0004791//thioredoxin-disulfide reductase activity	GO:0005634//nucleus
345	CL11544.Contig1_All	816 1709 minus strand predicted protein [Physcomitrella patens subsp. patens] >gi|162666600|gb|EDQ53250.1| predicted protein [Physcomitrella patens subsp. patens]	40735	FEDFCSKFNKTYKETDEYNLRKKTYEDNMETAALMTEYEQGTAVYGETIFSDMTRAEFKKFYTSGSMEPKYNPMMKEAKIPTGDIPESFDWRDHNAVTPVKNQGSCGSCWAFSTTGNIEGQWAIKKNKLVPLSEQELVDCDKLDDGCQGGLPSDAYTAIMQIGGLEGEADYPYRGRNDKCSFDKSEVRATISGAVNISSDEQEMASWLYKNGPISIGINAFMMQFYLGGIAHPWKIFCNPRSLDHGVLIVGYGVKGSKPYWIVKNSWGASWGVQGYYLVYRGGGVCGLNTMCTSAVVN	62	4.7	-	2	2	1	1	0.344	1.005	0.693	2	2	2	*	-	-	CL11544.Contig1_All	68.59	3e-109	gi|156389068|ref|XP_001634814.1|	predicted protein [Nematostella vectensis] >gi|156221901|gb|EDO42751.1| predicted protein [Nematostella vectensis]	77.14	2e-09	sp|P32956|CYSP3_CARCN	Cysteine proteinase 3 (Fragment) OS=Carica candamarcensis PE=1 SV=1	68.59	9e-109	A7S0K3	A7S0K3_NEMVE Predicted protein OS=Nematostella vectensis GN=v1g204928 PE=3 SV=1	AF1946_2	81.3	2e-15	COG4870	Cysteine protease	O	Posttranslational modification, protein turnover, chaperones ;	K01373|1|3e-110|398|nve:NEMVE_v1g204928|cathepsin F [EC:3.4.22.41]	GO:0006508//proteolysis	GO:0008234//cysteine-type peptidase activity	-
346	CL4917.Contig2_All	99 554 predicted protein [Hordeum vulgare subsp. vulgare] >gi|326522712|dbj|BAJ88402.1| predicted protein [Hordeum vulgare subsp. vulgare]	23585	MSLVIPEKFQHILRVLNTNIDGKCKIMYALTAIKGIGRRYSNICCRKADVDTSKRAGELSDEEVEKLVTIMANPRQYKIPDWFLNRQKDVKDGKFNQIIANGLENKLREDLERLKKIRAHRGLRHYWGLRVRGQHTKTTGRRGRTVGVSKKK	463	36.8	-	35	35	7	7	0.901	0.995	0.952	31	31	31	-	-	-	CL4917.Contig2_All	88.52	1e-26	gi|297292320|ref|XP_002804062.1|	PREDICTED: 40S ribosomal protein S18-like [Macaca mulatta]	85.5	1e-64	sp|Q8ISP0|RS18_BRABE	40S ribosomal protein S18 OS=Branchiostoma belcheri GN=RPS18 PE=2 SV=1	85.5	3e-63	C3Y261	C3Y261_BRAFL Putative uncharacterized protein OS=Branchiostoma floridae GN=BRAFLDRAFT_114927 PE=3 SV=1	SPCC1259.01c	244	4e-65	COG0099	Ribosomal protein S13	J	Translation, ribosomal structure and biogenesis ;	K02964|1|1e-64|244|bfo:BRAFLDRAFT_114927|small subunit ribosomal protein S18e	GO:0006412//translation	GO:0003735//structural constituent of ribosome;GO:0003723//RNA binding	GO:0005840//ribosome
347	Unigene15894_All	1 462 LEN=598; minus strand; translated	21708	EDDGDYVLVLKFSEVWFAARSEKVFDVTLNEHTVVSDLDIYDKVGLGTAHDEVVPFSISKGKVQVNGEVSDFEGNLEVDFVKGDHDNPKINAIVLVKGSLEDVPQLPPLPWNTDDEEDPDGGEDDEEDDETKEIREKQKIKHKSGPKTVDPYAS	128	16.2	-	7	7	2	2	0.673	0.741	0.826	6	7	6	*	*	-	Unigene15894_All	65.77	1e-36	gi|405962701|gb|EKC28352.1|	Malectin [Crassostrea gigas]	52.26	7e-36	sp|A9C3P0|MLEC_DANRE	Malectin OS=Danio rerio GN=mlec PE=3 SV=1	64.71	5e-09	F0J8J7	F0J8J7_AMBVA Hypothetical conserved secreted protein 237 (Fragment) OS=Amblyomma variegatum PE=2 SV=1	-	-	-	-	-	-	-	-	-	-	GO:0016020//membrane;GO:0005783//endoplasmic reticulum
348	Unigene5505_All	390 794 minus strand conserved hypothetical protein [Albugo laibachii Nc14]	19745	CGRGVMDKLLTREEAQTLLKVAKSGLAYGGSNGGASILDLNTGALSKGTSFINIYKLLEDKGITDVFSEKDFQVYKSVSTKIRMAIATQFRVPYAKLYLTSPTFFSKMTNKPAKTIHDEYWHLHVDKETYSTFDY	42	8.1	-	1	1	1	1	---	---	---	1	1	1	-	-	-	Unigene5505_All	66.07	5e-13	gi|307171874|gb|EFN63523.1|	PKHD domain-containing transmembrane protein FLJ22222-like protein [Camponotus floridanus]	54.07	1e-34	sp|Q9D136|OGFD3_MOUSE		66.07	2e-12	E2ASR6	E2ASR6_CAMFO PKHD domain-containing transmembrane protein FLJ22222-like protein (Fragment) OS=Camponotus floridanus GN=EAG_05605 PE=4 SV=1	-	-	-	-	-	-	-	-	-	GO:0016705//oxidoreductase activity, acting on paired donors, with incorporation or reduction of molecular oxygen;GO:0005488//binding	-
349	CL6020.Contig1_All	186 791 hypothetical protein ARALYDRAFT_481300 [Arabidopsis lyrata subsp. lyrata] >gi|297324593|gb|EFH55013.1| hypothetical protein ARALYDRAFT_481300 [Arabidopsis lyrata subsp. lyrata] >CL6020.Contig2_All 186 791 minus strand hypothetical pro	31739	MAPTLRSKGKAKSENVAPVKAKKRKTTAKAKKADPPKGKTPKVEEKKVKEDETVNETATDGNTSENGHADDENASKDEEKSDDTDENEKNGEAAEEETNAENDSEAEEVSENGKMSVVVEHCKSUHVYKRNANQLLEAVRKEFPDIDSVVNSTKPRSKSFEFTLKKADGSEVVIWSGLSKGPPRRLKFPEADILISGIKENM	57	17.8	-	4	4	3	3	1.858	0.798	0.684	4	4	4	*	-	*	CL6020.Contig1_All	58.7	2e-07	gi|386118305|gb|AFI99100.1|	selenoprotein H [Acropora millepora]	50.57	2e-19	sp|Q8IZQ5|SELH_HUMAN	Selenoprotein H OS=Homo sapiens GN=SELH PE=1 SV=2	51.72	8e-19	D6QZ31	D6QZ31_PIG Selenoprotein H OS=Sus scrofa GN=SELH PE=2 SV=1	-	-	-	-	-	-	-	-	-	-
350	Unigene27198_All	87 245 F4N2.17 [Arabidopsis thaliana]	7679	TSIMMDISRKNPLDDFELLQRIGSGTYGDVYKARMTKTGILAAVKVIKIEPGD	32	22.6	-	1	1	1	1	---	---	---	1	1	1	-	-	-	Unigene27198_All	85.42	1e-17	gi|390342780|ref|XP_798070.3|	PREDICTED: mitogen-activated protein kinase kinase kinase kinase 5-like isoform 2 [Strongylocentrotus purpuratus]	75	5e-16	sp|Q8IVH8|M4K3_HUMAN	Mitogen-activated protein kinase kinase kinase kinase 3 OS=Homo sapiens GN=MAP4K3 PE=1 SV=1	85.42	5e-17	H3JCN3	H3JCN3_STRPU Uncharacterized protein OS=Strongylocentrotus purpuratus GN=SPU_024316gn PE=4 SV=1	-	-	-	-	-	-	-	K04406|1|2e-18|90.9|spu:593505|mitogen-activated protein kinase kinase kinase kinase 3 [EC:2.7.11.1]	-	-
351	Unigene1015_All	1 672 hypothetical protein THAOC_32269 [Thalassiosira oceanica]	30626	IAKRLLDTGPVAKSHLLRMSALSRSWEAVDPDLKKFKVCLNYDDQGHVVFPGIDALKEKRIVVVTMVTAGRLVLADSFKNHFTHIFLDEAGHAIEPEALISVTGLLPKNGQLVLAGDPKQLGPVLRSPISKQNGLELSLLERLMTTEAAYQRTEGVYNDLMLTKLLCNYRSHPSILCKPNEMFYEGELKVFADEMIRESLSGIDQLPKKGFPVIFHGIEGKDER	26	4	-	1	1	1	1	---	---	---	1	1	1	-	-	-	Unigene1015_All	58.08	5e-66	gi|260822597|ref|XP_002606688.1|	hypothetical protein BRAFLDRAFT_209586 [Branchiostoma floridae] >gi|229292032|gb|EEN62698.1| hypothetical protein BRAFLDRAFT_209586 [Branchiostoma floridae]	50.44	4e-54	sp|Q1LXK4|M10B1_DANRE	Putative helicase mov-10-B.1 OS=Danio rerio GN=mov10b.1 PE=2 SV=2	60.23	8e-22	H3HSQ3	H3HSQ3_STRPU Uncharacterized protein OS=Strongylocentrotus purpuratus GN=SPU_004714gn PE=4 SV=1	YMR080c	65.5	7e-11	COG1112	Superfamily I DNA and RNA helicases and helicase subunits	L	Replication, recombination and repair ;	K13983|1|2e-42|172|nve:NEMVE_v1g93294|putative helicase MOV10L1 [EC:3.6.4.13]	-	-
352	Unigene19169_All	3 689 minus strand UDP-Glycosyltransferase/glycogen phosphorylase [Coccomyxa subellipsoidea C-169]	30566	AQEIPKDLKEFVEGSGTHGVIIFSLGSAVTAELNDDVMDTFAAVFSKLSQRVLWKRDAKVQSGLGQNTKLLSWLPQNDLLGHPKTRLLIYHGGSHGVMEAIYHGVPMIIIPLFGDQYAHAVRVQEKGMGVMLDKSNLTEESVMEAIREVIDNPKYKQRVQHFSNIHHDAPLKPLERAVYWIEHVMKFGGDHLRPRSADMNFIELYMIDTVIFLSSLVLFLLYVEYLFLK	191	7.9	-	8	1	2	1	---	---	---	-	-	-	-	-	-	Unigene19169_All	57.95	2e-57	gi|390366576|ref|XP_793929.3|	PREDICTED: UDP-glucuronosyltransferase 2C1-like [Strongylocentrotus purpuratus]	47.89	2e-57	sp|P36514|UD2C1_RABIT	UDP-glucuronosyltransferase 2C1 (Fragment) OS=Oryctolagus cuniculus GN=UGT2C1 PE=2 SV=1	51.42	2e-63	H3HGF1	H3HGF1_STRPU Uncharacterized protein OS=Strongylocentrotus purpuratus GN=SPU_000692gn PE=4 SV=1	BS_yojK	63.9	2e-10	COG1819	Glycosyl transferases, related to UDP-glucuronosyltransferase	GC	Carbohydrate transport and metabolism ; Energy production and conversion ;	K00699|1|4e-62|238|spu:592958|glucuronosyltransferase [EC:2.4.1.17]	-	GO:0016757//transferase activity, transferring glycosyl groups	GO:0016020//membrane;GO:0043231//intracellular membrane-bounded organelle
353	CL4794.Contig3_All	238 3435 predicted protein [Hordeum vulgare subsp. vulgare]	145739	LAEQASKLLDFSQKLDINLLDNVVDCLYKGEGLEQRTAGQILTSLKEHPDAWTKVDTILEFSSNEQTKYYGLQILENVIKSRWKVLPRNQCEGIKKYTVGLIIKISSDSSNSNKKMKVYLGKLNMILVQILKHEWPKNWPTFISDIVGASKTSETLCSNNLTILKLLSEEVFDFSSGQMTQAKAKHLKDSMCNEFSQVFTLCQFVMDNSQNAALMQTCLETLLRFLNWIPLGYIFETKLISTLIYKFLNVPMFRNVTLKCLTEIAGVNVTQYDQQFVLLFTLAMVQLKQMLPIETNIKEAYANGSDDEQNFIQNLSLFLYTFFKEHVQQIEKKQELNDILLEAHHYLLLISEVEETEIFKICLEYWNILASELYRESPFPSSTTSPLLLGNSQPEIPPR…	46	2.1	-	2	2	2	2	---	---	---	1	1	1	-	-	-	CL4794.Contig3_All	98.35	1e-67	gi|6581131|gb|AAF18474.1|AF210153_1	nuclear export factor CRM1 [Sus scrofa]	80.88	0	sp|Q80U96|XPO1_RAT	Exportin-1 OS=Rattus norvegicus GN=Xpo1 PE=2 SV=1	85.89	0	H3IDP7	H3IDP7_STRPU Uncharacterized protein OS=Strongylocentrotus purpuratus GN=SPU_012202gn PE=4 SV=1	SPAC1805.17	1083	0	COG5101	Importin beta-related nuclear transport receptor	YU	Nuclear structure ; Intracellular trafficking, secretion, and vesicular transport ;	K14290|1|0.0|1875|spu:575382|exportin-1	GO:0042176//regulation of protein catabolic process;GO:0000122//negative regulation of transcription from RNA polymerase II promoter;GO:0051028//mRNA transport;GO:0046825//regulation of protein export from nucleus;GO:0034504//protein localization to nucleus;GO:0042493//response to drug;GO:0010824//regulation of centrosome duplication	GO:0008565//protein transporter activity;GO:0019904//protein domain specific binding;GO:0003723//RNA binding	GO:0015030//Cajal body;GO:0005737//cytoplasm;GO:0005730//nucleolus;GO:0000776//kinetochore;GO:0005642//annulate lamellae;GO:0030529//ribonucleoprotein complex
354	Unigene8407_All	243 1670 minus strand PREDICTED: serine carboxypeptidase-like 20-like [Fragaria vesca subsp. vesca]	59896	HSIIAILFAGLLGACTAASNPDAITFLPGLTKQPSFDQYSGYLAATGGKMFHYWLVSSQSKPSTDPLIVWTNGGPGCSSMLGILTENGPFIIQDDGVSLSYNDNSWNKFANVLYIESPAGVGFSYTPDGNVTTSDDEITDDHFTALLDFYKKYPALKSNELFLIGESYSGVYTPLLAAQVLAAIDAKILTGVVFGGFATGNGVTNYATLSNSLVYLLYYHGIIGYSLWDELVQNCCDGPNNCNFYNSTVTECTDRVTQAITILGTSGINPYNILATCAGFSPQKSNGTKFFRTTPEMEIMFRGTRIEEKLHKELKQFPSIRLSESPPCLNYTNAQDYLNNAYVRTALHIKPSLPKWTPCSATVLKNYQRVYSDMAPIYTYILQNLAHKVRLLVYNGDLD…	61	5.7	-	2	2	2	2	0.82	1.085	0.994	2	2	2	-	-	-	Unigene8407_All	59.81	7e-69	gi|291232036|ref|XP_002735966.1|	PREDICTED: cathepsin A-like, partial [Saccoglossus kowalevskii]	46.88	3e-118	sp|P16675|PPGB_MOUSE	Lysosomal protective protein OS=Mus musculus GN=Ctsa PE=1 SV=1	53.77	2e-54	A2A5J8	A2A5J8_MOUSE Cathepsin A (Fragment) OS=Mus musculus GN=Ctsa PE=4 SV=1	YBR139w	152	9e-37	COG2939	Carboxypeptidase C (cathepsin A)	E	Amino acid transport and metabolism ;	K13289|1|2e-127|456|bfo:BRAFLDRAFT_280840|cathepsin A (carboxypeptidase C) [EC:3.4.16.5]	-	-	GO:0043231//intracellular membrane-bounded organelle
355	Unigene21016_All	1 370 LEN=370; minus strand; translated	17879	XSKDPACKQDGDPMLKRPLHAVSDNLQSEDNTTADVNWMKHTPAVSTDSNLVFEKMKNALLVRRNMVNAMNSAAHIIEEFPQFKITPGLIEQDFRLLFPEEYPKLLEQWPLLKQKVIAHARKST	18	8.9	-	1	1	1	1	---	---	---	-	-	-	-	-	-	Unigene21016_All	38.46	2e-07	gi|348540893|ref|XP_003457921.1|	PREDICTED: hypothetical protein LOC100707135 [Oreochromis niloticus]	-	-	-	-	36.13	5e-10	A8WHM9	A8WHM9_DANRE Novel protein OS=Danio rerio GN=si:ch211-163b2.4 PE=4 SV=1	-	-	-	-	-	-	-	-	-	-
356	Unigene783_All	519 1745 LEN=3052; minus strand; translated	51011	MAYEGFREELGPAQYPRAKTAVTVDITEAGFIFAAIILFISFLAIVPGIRGLSNRLFSFIRITVSIFLGVAIMLSAYGQEWESAEIHNVKTPYKTFFNKEIIADIGVKIGLNSVNITLKAADNILESAHYNEIGYPDEKIDYNERFHFYGGQGRIGFGRFSGRINREFRAAQWRGAPLPILWISEYFTLDGEDILWGRSYRLAGFYAWIMVWTAFPLWLLANILFFMVIRNGAYFLMLTGGSLLTANILYAGIRYGFQPMVIPFSAEHMLHFHKGPTFFLCMSAGLISFICGVVILFMDFNYPLEIASFFGVDPLQDFEDTFVYDERTDKASNGLTSSVVESKAVFKQRNKSRFDKPRRLPQSRNGHAAAPKDNALQEAAEPDQEDDIAMSSMSKQEEG…	447	11	-	14	14	3	3	0.476	1.273	0.694	12	12	12	*	*	*	Unigene783_All	68.73	2e-107	gi|115738140|ref|XP_001177754.1|	PREDICTED: dual oxidase maturation factor 1-like [Strongylocentrotus purpuratus]	33.08	2e-29	sp|Q1HG43|DOXA1_HUMAN	Dual oxidase maturation factor 1 OS=Homo sapiens GN=DUOXA1 PE=1 SV=1	58.5	1e-110	H3JG16	H3JG16_STRPU Uncharacterized protein OS=Strongylocentrotus purpuratus GN=SPU_025513gn PE=4 SV=1	-	-	-	-	-	-	-	-	-	-
357	Unigene22558_All	356 814 NADH dehydrogenase subunit 10 [Hemiselmis andersenii] >gi|186461068|gb|ACC78230.1| NADH dehydrogenase subunit 10 [Hemiselmis andersenii]	20187	EFVVARLDDLINWARRSSMWPMTFGLACCAMEMMHMAAPRYDMDRFGVVFRASPRQSDVMIVAGTLTNKMAPALRKVYDQMPEPRWVISMGSCANGGGYYHYSYSVVRGCDRIVPVDIYVPGCPPTAEALLYGILQLQKKIKRQKNVSLWYRK	109	9.2	-	4	4	1	1	1.862	1.298	0.884	4	3	4	*	*	-	Unigene22558_All	95.41	8e-38	gi|470641619|ref|XP_004325536.1|	PREDICTED: NADH dehydrogenase [ubiquinone] iron-sulfur protein 7, mitochondrial-like, partial [Tursiops truncatus]	92.16	4e-56	sp|P42026|NDUS7_BOVIN	NADH dehydrogenase [ubiquinone] iron-sulfur protein 7, mitochondrial OS=Bos taurus GN=NDUFS7 PE=1 SV=1	92.16	3e-54	C3Z8T6	C3Z8T6_BRAFL Putative uncharacterized protein OS=Branchiostoma floridae GN=BRAFLDRAFT_99644 PE=3 SV=1	RSc2061	262	1e-70	COG0377	NADH:ubiquinone oxidoreductase 20 kD subunit and related Fe-S oxidoreductases	C	Energy production and conversion ;	K03940|1|2e-56|217|hmg:100201748|NADH dehydrogenase (ubiquinone) Fe-S protein 7 [EC:1.6.5.3 1.6.99.3]	GO:0006091//generation of precursor metabolites and energy;GO:0032981//mitochondrial respiratory chain complex I assembly	GO:0046872//metal ion binding;GO:0003954//NADH dehydrogenase activity	GO:0005747//mitochondrial respiratory chain complex I
358	Unigene33230_All	2886 3248 hypothetical protein AURANDRAFT_62669 [Aureococcus anophagefferens]	14905	ANNWCRQNGGYLVSVTSSYEAQILRGLVNPSVASYWIGLRESTTGTFEWTDGQPYSYVNWKTGQPNNQNGEESCVEIDVTTGNKWQDKNCGFAAPFICKRPEGTVQPIPTPSSAPAGGGCP	33	9.1	-	1	1	1	1	---	---	---	1	1	1	-	-	-	Unigene33230_All	50	4e-14	gi|390365486|ref|XP_003730831.1|	PREDICTED: C-type mannose receptor 2-like, partial [Strongylocentrotus purpuratus]	40.95	2e-12	sp|A7X3Z7|LEC2_LIOPO	Lectoxin-Lio2 OS=Liophis poecilogyrus PE=2 SV=1	45.88	1e-09	H3IRG7	H3IRG7_STRPU Uncharacterized protein OS=Strongylocentrotus purpuratus GN=SPU_016771gn PE=4 SV=1	-	-	-	-	-	-	-	K06560|1|5e-23|106|spu:757247|mannose receptor, C type	-	-
359	Unigene16347_All	70 1149 minus strand predicted protein [Hordeum vulgare subsp. vulgare]	40229	LIALFATAASAMIAPLHTVKEKIDGSYIVVFNDDAKTLASVSTIKNSPFFSSLGGRVDRVYGSALNGFAATLAPKALELVRRFNFVKYVEEDQIMRIDAVASWGLDRVDQQDLPLDNSFTPRNDGEGVNVYVIDTGINPTHVDFGGRAYTEASMDFVSINRGGVDCNGHGSHCAGTVGGTTYGVANQANLFGVRVLSCLGSGSNTGVIGGMDWVADNHVKPAVASMSLGGGPSQSSDDAVTRMHNAGVTVVVAAGNDNEDASNHSPARAPLAITVASSASDDTRSSFSNFGSLIDIFAPGSSITSCWYDSDTAEKTISGTSMATPHVAGGAAILLAQDSSRTPDDVVNTMTSEATSGALT	133	7.2	-	1	1	1	1	---	---	---	1	-	1	-	-	-	Unigene16347_All	99.72	0	gi|86277304|gb|ABC87995.1|	proprotein convertase subtilisin/kexin type 9 preproprotein [Apostichopus japonicus]	51.84	8e-77	sp|P08594|AQL1_THEAQ	Aqualysin-1 OS=Thermus aquaticus GN=pstI PE=1 SV=2	99.72	0	Q1WDP1	Q1WDP1_STIJA Proprotein convertase subtilisin/kexin type 9 preproprotein OS=Stichopus japonicus PE=2 SV=1	VC0157	288	1e-77	COG1404	Subtilisin-like serine proteases	O	Posttranslational modification, protein turnover, chaperones ;	K12821|1|1e-43|177|spu:587854|pre-mRNA-processing factor 40!K13050|2|7e-41|168|bfo:BRAFLDRAFT_265827|proprotein convertase subtilisin/kexin type 9 [EC:3.4.21.-]!K01336|3|5e-30|132|bfo:BRAFLDRAFT_121465|cerevisin [EC:3.4.21.48]	-	-
360	CL8289.Contig1_All	136 708 minus strand Os01g0254000 [Arabidopsis lyrata subsp. lyrata] >gi|297320778|gb|EFH51200.1| Os01g0254000 [Arabidopsis lyrata subsp. lyrata]	25177	YFVDFFTNILGFLGLYKKSGKLVFLGLDNAGKTTLLSMLKDDRMAQHVPTLHPTSEELQIGGMSFTTFDLGGHEQARRVWKDYLPAVEGIVFLIDAADRPRFAEAKAELDSLMTDEMVANAPILILGNKIDLPSAAGEEELRGHFGVHGLTTGKGQVPLKDLQGRPLELFMCSVLKKQGYGEGFRWLSQYL	327	18.3	-	22	22	3	3	1.412	0.911	1.312	13	13	12	*	-	*	CL8289.Contig1_All	84.27	2e-38	gi|148700187|gb|EDL32134.1|	SAR1 gene homolog A (S. cerevisiae), isoform CRA_c [Mus musculus]	75.81	5e-81	sp|Q3T0T7|SAR1B_BOVIN	GTP-binding protein SAR1b OS=Bos taurus GN=SAR1B PE=2 SV=1	80.1	8e-84	H3HYG7	H3HYG7_STRPU Uncharacterized protein OS=Strongylocentrotus purpuratus GN=SPU_006767gn PE=3 SV=1	YDL137w	112	3e-25	COG1100	GTPase SAR1 and related small G proteins	R	General function prediction only ;	K07953|1|3e-85|313|spu:582657|GTP-binding protein SAR1 [EC:3.6.5.-]	GO:0035293//chitin-based larval cuticle pattern formation;GO:0009306//protein secretion;GO:0048081//positive regulation of cuticle pigmentation;GO:0035050//embryonic heart tube development;GO:0007029//endoplasmic reticulum organization;GO:0006886//intracellular protein transport;GO:0050774//negative regulation of dendrite morphogenesis;GO:0016192//vesicle-mediated transport	GO:0005525//GTP binding;GO:0003924//GTPase activity	GO:0005794//Golgi apparatus;GO:0030134//ER to Golgi transport vesicle;GO:0005783//endoplasmic reticulum;GO:0005811//lipid particle
361	Unigene22341_All	84 1187 PREDICTED: uncharacterized protein LOC101310107 [Fragaria vesca subsp. vesca]	44334	IATMGDEELGKLFIGGVDKNTRPEEFRSLFENKGQIDDIVLMKDATMPDRNRGFGFVKFRDPSSAEELLNDPEPLVLNGKTLDVKACRQRDSQQKQDGAGQPDSPNKIFVGGLPQTCSEETLKNSFSAYGEVQHVKIMKDRNTGNLRGFAFVTFATAEPVQKLIDERFVQCDGKSVECKAAEHRYRFQGPDGGRGNGFGYGGGGGQGGGFGGQGGGNWQAQGGQGDGYQYNNAGAWGGQQQPMSGVWGQQTPMGNYNQAGYGRGQSSGGQWNQSYGGGYGSSQQQQQQQPSSQYGGGYTSAQTQGYGDQYSQGAAYNANQGYSANYSGAYGTTQPQQSQYGSQAATGYSAQGSYGAGYANTSNNYGQQ	521	16.3	-	22	20	5	4	1.291	0.826	0.776	18	18	17	*	*	*	Unigene22341_All	42.61	3e-34	gi|1094717|prf||2106321A	stage-specific activator protein	48.39	1e-07	sp|Q8WP23|BOLL_MACFA	Protein boule-like OS=Macaca fascicularis GN=BOLL PE=2 SV=2	50.56	2e-12	B8LKC7	B8LKC7_PICSI Putative uncharacterized protein OS=Picea sitchensis PE=2 SV=1	ECU03g0730	55.5	1e-07	COG0724	RNA-binding proteins (RRM domain)	R	General function prediction only ;	K12741|1|3e-36|152|spu:373473|heterogeneous nuclear ribonucleoprotein A1/A3!K14411|4|5e-31|135|tca:655156|RNA-binding protein Musashi	-	GO:0003723//RNA binding	GO:0005737//cytoplasm;GO:0005844//polysome;GO:0005634//nucleus
362	CL3832.Contig1_All	2594 3631 minus strand hypothetical protein GUITHDRAFT_64440, partial [Guillardia theta CCMP2712] >CL3832.Contig5_All 2594 3631 minus strand hypothetical protein GUITHDRAFT_64440, partial [Guillardia theta CCMP2712]	44691	VEPVIKDNKDGTYNVQYTAPSPLKHNIAVTFGDVSIPNSPFKVNIGAGPDRVKIYGPGVEPGKVKANEPTYFTVDAKDAGNAPITAKVKSKPGVNGPQVKEMPVTLTDNGDGTHTANYTPEGPGDYEVEVKYGGKDVPKTPIQITAIPNVDVSKIKVNDLQDTIEVGEPCVLNVDASEAGKADLQARVRAPSGKELPVEVTKVGEDQYRVSFVPEEEGPHTIDVDYDNDSIFDSVLVTNAVKKPDAGKVVASGPGLESGIVDKPAQFLLDIRNAGNGGLGINVSGPSEADVDCQDNGDGTCSVFYTPKSAGPYTINVLFADEPIPGSPFTANVIDPSKVSCNGPGL	1758	30.3	-	75	12	8	2	1.015	1.205	0.954	9	11	11	-	-	-	CL3832.Contig1_All	54.09	9e-103	gi|390359553|ref|XP_003729505.1|	PREDICTED: filamin-C isoform 1 [Strongylocentrotus purpuratus]	42.41	1e-61	sp|O75369|FLNB_HUMAN	Filamin-B OS=Homo sapiens GN=FLNB PE=1 SV=2	54.09	3e-102	H3ITW4	H3ITW4_STRPU Uncharacterized protein OS=Strongylocentrotus purpuratus GN=SPU_017634gn PE=4 SV=1	-	-	-	-	-	-	-	K04437|1|2e-91|336|spu:579510|filamin	GO:0007010//cytoskeleton organization;GO:0007165//signal transduction	GO:0042802//identical protein binding	GO:0043232//intracellular non-membrane-bounded organelle;GO:0044444//cytoplasmic part;GO:0005634//nucleus;GO:0005886//plasma membrane
[truncated: 3,061 more rows]
